# Supplementary material for: Skeletal Muscle Transcriptome Alterations Related to Declining Physical Function in Older Mice
Source: J Ageing Longev. Author manuscript; Available in PMC 2023 Oct 24. (PMC10597580; doi:10.3390/jal3020013)
Supplement: JAL3020013 Supplementary Material [file NIHMS1905574-supplement-JAL3020013__Supplementary_Material.zip]

Archive with 9 entries (9 files):
- eFigure1 GOrilla_6m vs. 28m_vf.pdf
- eFigure2 GOrilla 6m vs. 24m_vf.pdf
- eTable S10-S16 6m--28m DEGs with Strong Association to CFAB and CFAB Determinants.xlsx
- eTable S17-S22 6m-24m DEGs with Strong Association to CFAB and CFAB Determinants.xlsx
- eTable S2-S3 Differential Gene Expression.xlsx
- eTable S23-S24 DEGs vs. TA Mass.xlsx
- eTable S25 ChEA Transcription Factor Analysis of DEGs Highly Associated with CFAB.xlsx
- eTable S4-S9 GSEA and GOrilla_vf.xlsx
- Graber et al._NGS_Online Supplemental Section_vf.pdf
