# Supplementary material for: Skeletal Muscle Transcriptome Alterations Related to Declining Physical Function in Older Mice
Source: J Ageing Longev. Author manuscript; Available in PMC 2023 Oct 24. (PMC10597580; doi:10.3390/jal3020013)
Supplement: JAL3020013 Supplementary Material [file NIHMS1905574-supplement-JAL3020013__Supplementary_Material.zip › eTable S2-S3 Differential Gene Expression.xlsx]

## Sheet: eTable S2  6m vs. 28m
log2fc≥1, qval≤0.05
gene id	base Mean	log2 Fold Change	lfc SE	stat	pvalue	padj		eTable S1 Gene Expression Changes from 6 to 28 months of age.
Bpifb1	11.4775	4.53438	1.28815	3.52007	0.000431425	0.00225594		KEY: lfc SE = standard error of the log2 fold change, padj = qval = pvalue adjusted for multiple comparisons.
Krt18	254.814	4.48683	0.903449	4.96634	6.82289e-07	1.43219e-05
Ubd	4.20084	4.46345	1.02157	4.36921	1.24694e-05	0.000137572
Sln	599.191	4.32713	0.777333	5.56664	2.59703e-08	1.08185e-06
Tac4	3.68392	4.28063	1.2242	3.49668	0.000471091	0.00242029
Sprr1a	2.08038	3.89064	1.1505	3.38171	0.000720354	0.00337971
Syt4	2.04122	3.84713	1.10979	3.46655	0.000527175	0.00264619
Dntt	1.92092	3.73983	0.974082	3.83934	0.000123364	0.000849059
Atp13a4	2.53517	3.70577	1.10572	3.35145	0.000803881	0.00368495
1300002K09Rik	1.31709	3.67474	1.34907	2.72391	0.00645133	0.0196704
4930558C23Rik	1.30435	3.66331	1.18148	3.10061	0.00193122	0.00745329
Ccl17	2.4258	3.65056	1.18772	3.07357	0.00211513	0.00798386
1110059M19Rik	9.3095	3.61254	0.72952	4.95194	7.34767e-07	1.51674e-05
Chrng	41.2694	3.5989	0.837503	4.29718	1.72983e-05	0.000177983
AA467197	9.17668	3.58577	0.66278	5.41019	6.29574e-08	2.21213e-06
Neil3	2.26253	3.56387	1.06972	3.33159	0.000863514	0.00389676
Nppb	1.66048	3.55059	1.035	3.43053	0.000602401	0.00293448
Erc2	45.9732	3.54275	0.352494	10.0505	9.13815e-24	4.92333e-20
Orm2	3.98948	3.53267	1.17147	3.01559	0.00256477	0.0093114
C130026I21Rik	2.19613	3.51159	1.15805	3.03233	0.00242674	0.00888508
Olig1	2.75012	3.4069	1.07101	3.181	0.00146766	0.0059858
F10	6.25168	3.38451	0.871555	3.88331	0.000103046	0.00073501
Igfbp2	10.0457	3.30482	1.14354	2.89	0.00385247	0.0129697
Gbp1	1.43456	3.28016	1.26429	2.59447	0.00947362	0.0268554
Gm7609	1.90948	3.26632	0.943147	3.46321	0.000533766	0.00267098
Gdf5	44.4985	3.26258	0.437424	7.45863	8.74287e-14	3.00662e-11
Krt8	29.2127	3.12803	1.0681	2.92859	0.00340501	0.0117421
Cdca5	2.78234	3.07917	1.17452	2.62164	0.00875073	0.0251624
Ccnb1	3.65694	3.07566	1.04789	2.93511	0.00333433	0.0115353
Ces2c	21.72	3.04843	0.792124	3.84842	0.000118881	0.000825023
Scn5a	78.2934	3.02128	0.679232	4.44808	8.66401e-06	0.000104505
Gm2694	3.56541	3.01735	0.757972	3.98082	6.86774e-05	0.000532135
Ccdc79	0.836656	3.00738	1.19583	2.5149	0.0119066	0.0323222
Rrad	401.9	2.991	0.590967	5.06119	4.16639e-07	9.71737e-06
Fbp1	1.56313	2.97399	0.948933	3.13404	0.00172418	0.00679707
4933415F23Rik	67.1064	2.94719	0.477015	6.17839	6.47585e-10	5.85019e-08
Mt3	73.4215	2.93223	0.370247	7.91966	2.38152e-15	1.28309e-12
Epha5	1.50691	2.92146	1.02171	2.85937	0.00424479	0.0140017
Mapk13	3.20141	2.88737	0.878383	3.28714	0.0010121	0.00444284
4933404M02Rik	1.08385	2.88419	1.07101	2.69295	0.00708232	0.0211436
Slc17a8	3.16302	2.83634	0.800971	3.54113	0.000398422	0.00211554
Cdc25c	1.36059	2.78247	1.19823	2.32214	0.0202251	0.0497109
Vwc2	1.33286	2.74563	1.17928	2.32822	0.0199004	0.0490994
Otos	3.64531	2.74181	0.81147	3.37882	0.000727977	0.00340657
Scg5	3.03127	2.73735	0.797994	3.43028	0.00060295	0.00293627
Padi1	5.39785	2.72336	0.637202	4.27393	1.92054e-05	0.000192442
Pydc4	1.76567	2.69757	0.944915	2.85483	0.00430602	0.014169
Ankrd1	1974.76	2.68099	0.284572	9.42112	4.46289e-21	1.03048e-17
Cntn2	4.75568	2.67947	1.06626	2.51296	0.0119724	0.0324649
Bcl2a1b	7.16806	2.66268	0.78979	3.37138	0.000747919	0.00348375
Cacng4	5.51809	2.62953	0.57977	4.53548	5.74737e-06	7.60809e-05
AU022793	2.14155	2.62952	1.1054	2.37879	0.0173695	0.0439486
Birc5	9.98499	2.62795	0.725122	3.62415	0.000289912	0.00164531
Arhgdig	33.195	2.62652	0.417829	6.28611	3.25517e-10	3.30453e-08
Cxcl10	38.0315	2.6054	0.345833	7.53369	4.93248e-14	1.89818e-11
2310034O05Rik	1.21853	2.57696	1.10526	2.33155	0.0197245	0.0487176
Hsf2bp	12.5979	2.56515	0.50776	5.05189	4.37453e-07	1.0072e-05
Slc24a1	2.14466	2.55888	0.911401	2.80763	0.00499071	0.0159638
Ly6i	1.62225	2.52531	1.08748	2.32217	0.0202235	0.0497109
Soat2	3.70698	2.51707	0.783571	3.21231	0.00131673	0.00547524
Ctsw	5.07495	2.50463	0.738351	3.39219	0.000693374	0.00327882
Cdk1	12.4963	2.50384	0.751648	3.33113	0.000864938	0.00390176
Kif2c	4.83681	2.47608	0.822344	3.011	0.00260388	0.00942375
Gm4792	4.07995	2.47058	0.807168	3.06079	0.0022075	0.00823635
Akr1c19	2.52235	2.47001	0.865346	2.85436	0.00431239	0.0141698
Ccl5	11.4909	2.46603	0.610172	4.04154	5.31016e-05	0.000432602
Kcnip1	1.14902	2.46523	1.0043	2.45468	0.014101	0.0371578
BC051142	7.60737	2.46217	0.512607	4.80323	1.56128e-06	2.77004e-05
Timp1	54.9628	2.45301	0.654399	3.7485	0.000177899	0.00112848
Fam64a	5.03109	2.44449	0.928277	2.63336	0.00845447	0.0244848
Cxcl2	2.07711	2.43961	1.01681	2.39928	0.0164275	0.042099
Cep55	4.35435	2.43761	0.806068	3.02407	0.00249396	0.0090911
Ckap2	10.672	2.43058	0.646015	3.76242	0.000168278	0.00107889
Gm7538	5.91381	2.41803	0.594238	4.06913	4.71897e-05	0.000392956
Mxd3	3.8389	2.4109	0.944832	2.55167	0.0107209	0.0297276
Pbk	6.62617	2.40281	0.755574	3.18012	0.00147215	0.00599808
Serpina1b	1.10464	2.39368	1.03443	2.31402	0.0206667	0.0505733
Eomes	1.48309	2.37204	0.999193	2.37396	0.0175986	0.0444088
8430423G03Rik	2.68113	2.36737	0.909748	2.60222	0.0092622	0.0263751
Cks2	4.36692	2.36107	0.921268	2.56285	0.0103817	0.0289609
Slpi	5.81592	2.35054	0.755628	3.11071	0.00186637	0.00726019
2410137F16Rik	94.7631	2.3363	0.324658	7.1962	6.19139e-13	1.75564e-10
Cdkn2a	8.98767	2.32248	0.648008	3.58404	0.000338324	0.00186124
Treml1	3.65674	2.31415	0.717646	3.22464	0.00126131	0.00528425
Hsd3b3	4.41275	2.29115	0.673168	3.40354	0.000665183	0.00316775
Cd3g	2.78347	2.28469	0.782481	2.91981	0.00350247	0.0120192
Snap91	3.11635	2.27413	0.838247	2.71295	0.00666863	0.0201856
Ropn1l	3.24155	2.27317	0.804642	2.82506	0.00472711	0.015287
Serpina3g	3.08553	2.26126	0.796764	2.83806	0.00453892	0.014767
Tmem151a	3.25899	2.23951	0.924763	2.42172	0.0154475	0.0400316
Oprd1	3.90493	2.22405	0.648801	3.42793	0.000608191	0.0029539
Mmp12	14.603	2.22352	0.609601	3.6475	0.000264804	0.00153638
Uchl1	201.025	2.22249	0.381666	5.82312	5.77586e-09	3.30758e-07
BC021891	10.9461	2.21634	0.40119	5.52443	3.30563e-08	1.32172e-06
1700101I11Rik	6.13671	2.209	0.468063	4.71946	2.36477e-06	3.82282e-05
Cdkn1a	702.31	2.20663	0.339056	6.50818	7.60683e-11	1.05085e-08
AF251705	14.8391	2.1829	0.583194	3.74301	0.000181832	0.00114659
Kcnd3	7.78742	2.15065	0.496405	4.33245	1.47458e-05	0.000157318
Cd3d	2.43915	2.1498	0.854919	2.51462	0.011916	0.0323369
Lhfpl3	3.34392	2.14642	0.643752	3.33423	0.000855374	0.00387266
Esco2	2.38681	2.13409	0.874008	2.44173	0.0146169	0.0382659
Gdf15	4.1544	2.13216	0.644375	3.30888	0.000936684	0.0041707
1700011I03Rik	14.2735	2.11628	0.40697	5.20009	1.99196e-07	5.5415e-06
Gadd45a	1190.97	2.11311	0.285216	7.40881	1.27433e-13	4.20348e-11
Cd8a	3.37417	2.10418	0.847829	2.48184	0.0130706	0.0348728
Klrd1	3.17238	2.1013	0.738225	2.84643	0.0044213	0.0144571
Cited1	12.1375	2.09941	0.541051	3.88024	0.000104352	0.000742302
Myog	154.073	2.09589	0.415489	5.0444	4.54958e-07	1.0357e-05
Capn11	10.3195	2.09556	0.81495	2.5714	0.0101289	0.0284077
Apol9a	5.87594	2.08436	0.641969	3.24683	0.00116698	0.00497792
Slc23a3	6.80119	2.08122	0.469878	4.42929	9.45458e-06	0.000111461
Gm4841	369.711	2.07813	0.493072	4.21465	2.50161e-05	0.000237008
Clec1b	8.97839	2.07451	0.56692	3.65926	0.000252945	0.00148505
Gsdma	8.02135	2.06575	0.593066	3.48317	0.000495515	0.00251777
Gal	5.15081	2.06505	0.812831	2.54057	0.0110672	0.0304942
Lgals3	316.916	2.06212	0.478786	4.30699	1.65493e-05	0.000171906
Steap1	3.24308	2.04866	0.831939	2.46251	0.0137967	0.0365149
Ccl8	56.7147	2.0433	0.611715	3.34028	0.000836934	0.00380731
Plac8	28.6299	2.041	0.522194	3.9085	9.28693e-05	0.000675217
Gabrg2	2.76517	2.03492	0.711034	2.86192	0.00421077	0.0139037
Aif1l	262.823	2.02584	0.576188	3.51593	0.000438212	0.00228184
Ndc80	6.49194	1.9919	0.597405	3.33425	0.000855285	0.00387266
Oaz1	14.0926	1.97958	0.522	3.79229	0.000149262	0.000983501
Mt2	389.901	1.97336	0.615998	3.20352	0.00135759	0.00561338
Rgs1	3.67377	1.96854	0.67581	2.91286	0.0035814	0.0122252
2900079G21Rik	12.3893	1.95492	0.5815	3.36185	0.000774212	0.00358247
Ms4a4b	5.91438	1.95093	0.53522	3.6451	0.000267289	0.0015479
Vaultrc5	2.15028	1.9306	0.770014	2.50722	0.0121684	0.0329168
Msln	20.1728	1.9269	0.450139	4.28069	1.86315e-05	0.000187899
2810417H13Rik	11.2141	1.91963	0.632986	3.03265	0.00242417	0.00888039
Lrrtm2	4.978	1.90986	0.543718	3.51259	0.00044377	0.00230558
Lcn2	39.5333	1.90966	0.821897	2.32348	0.0201534	0.0495722
Foxq1	5.84677	1.88442	0.497822	3.78533	0.000153503	0.00100326
Gins2	7.39192	1.88061	0.691776	2.71852	0.00655754	0.0199116
A930018P22Rik	3.70171	1.88055	0.693809	2.71047	0.00671879	0.0202907
Ccnb2	12.6592	1.87316	0.652575	2.87042	0.00409928	0.0136012
Prkcz	98.6781	1.87178	0.279141	6.7055	2.0072e-11	3.31045e-09
Ckap2l	5.51516	1.86862	0.677583	2.75777	0.00581978	0.0181138
Gm14446	2.45668	1.86221	0.712544	2.61347	0.00896277	0.0256899
Chrna9	10.2324	1.86101	0.475206	3.91621	8.99529e-05	0.000658151
Slc44a4	2.83445	1.84714	0.772428	2.39134	0.0167869	0.0427554
Calr4	3.19355	1.84494	0.658361	2.80232	0.0050737	0.0161844
Orm1	11.2306	1.83798	0.563226	3.26331	0.0011012	0.00476157
Ccna2	17.3595	1.83077	0.476666	3.84078	0.000122644	0.000845688
Klhdc8a	19.2732	1.82203	0.462879	3.9363	8.27483e-05	0.000615774
Cpne2	654.191	1.80592	0.341004	5.29589	1.18438e-07	3.63939e-06
Pnp2	3.71435	1.80536	0.745818	2.42065	0.0154928	0.0401361
Ankrd55	5.66183	1.80441	0.667967	2.70134	0.00690604	0.020713
Calml4	26.7821	1.79359	0.41552	4.31649	1.58528e-05	0.000165843
Ube2c	16.4426	1.7598	0.519473	3.38766	0.000704917	0.00332562
Cidea	25.4384	1.75951	0.368262	4.77788	1.77157e-06	3.05591e-05
2810032G03Rik	16.9798	1.75653	0.371789	4.72454	2.30641e-06	3.74707e-05
Stmn1	21.0027	1.74719	0.425304	4.10809	3.98943e-05	0.00034262
Il6	4.04262	1.74695	0.574237	3.04222	0.00234844	0.00865431
Cd52	45.9602	1.74364	0.389297	4.47894	7.50147e-06	9.29724e-05
Kif15	9.08843	1.73988	0.562645	3.09232	0.00198601	0.00760841
Snhg9	6.99217	1.73238	0.490797	3.52974	0.000415971	0.00218716
Serpinb1a	168.755	1.7319	0.379326	4.56573	4.97748e-06	6.82946e-05
Gm12185	39.3157	1.7276	0.464473	3.71949	0.000199628	0.00122777
Acoxl	3.21296	1.72602	0.653725	2.64029	0.0082836	0.0240892
Sh2d5	4.62473	1.71647	0.580457	2.9571	0.00310549	0.0108763
4732490B19Rik	6.62485	1.71217	0.669468	2.5575	0.0105426	0.0293137
Ms4a4c	6.81513	1.69399	0.622304	2.72213	0.00648627	0.0197402
F630206G17Rik	13.6718	1.68717	0.618791	2.72655	0.00639994	0.0195543
Gdap1l1	7.06675	1.68509	0.461236	3.65344	0.000258754	0.00150951
Apol9b	11.5294	1.68444	0.501891	3.35619	0.000790247	0.00363689
Zap70	15.8851	1.68084	0.367708	4.57112	4.85119e-06	6.71317e-05
Pcbd1	9.61776	1.6765	0.540172	3.10363	0.00191159	0.00740404
Mustn1	3289.29	1.67559	0.183734	9.11966	7.53628e-20	1.52261e-16
Poln	6.55464	1.67481	0.479515	3.49272	0.000478131	0.0024479
Aurkb	5.70063	1.66776	0.705754	2.36309	0.0181232	0.0454923
Rec8	10.3845	1.6615	0.578626	2.87146	0.00408577	0.0135686
Cetn4	4.42473	1.65334	0.568738	2.90703	0.00364875	0.0123823
5930438M14	12.0795	1.65241	0.498567	3.31431	0.000918707	0.00410308
Trappc6a	74.8577	1.65015	0.321645	5.13035	2.89197e-07	7.3611e-06
Gp9	8.07435	1.64974	0.591109	2.79093	0.00525567	0.0166244
Cenpe	8.93317	1.64663	0.693214	2.37536	0.017532	0.0442895
Retn	55.5961	1.64604	0.603831	2.72599	0.00641093	0.0195768
1700112H15Rik	2.91051	1.63399	0.682458	2.39428	0.0166532	0.0425154
Gtse1	5.89323	1.62901	0.597002	2.72865	0.00635943	0.0194526
Fam196a	11.7932	1.61823	0.511146	3.16588	0.00154613	0.00623818
Rgs11	17.9389	1.615	0.431733	3.74074	0.00018348	0.00115393
Gm4925	5.3885	1.61462	0.473637	3.40899	0.000652049	0.00311746
Gm12250	22.7876	1.60745	0.52119	3.08418	0.00204112	0.00777349
Gnmt	32.3654	1.60698	0.285572	5.62725	1.83109e-08	8.244e-07
Cnih2	4.08937	1.60312	0.556904	2.87863	0.00399401	0.0133351
Runx1	193.143	1.59973	0.361206	4.42886	9.47346e-06	0.000111461
Wdr27	3.21952	1.59852	0.622063	2.56971	0.0101784	0.0285098
Ppp1r1a	1142.46	1.59812	0.296066	5.39787	6.74365e-08	2.32225e-06
Uhrf1	10.644	1.58646	0.598186	2.65213	0.00799863	0.0233994
LOC100504703	25.3092	1.58567	0.321277	4.93553	7.99337e-07	1.61093e-05
Phxr4	8.36426	1.58173	0.507594	3.11612	0.00183245	0.00715752
Top2a	28.3711	1.57805	0.555068	2.84298	0.00446939	0.0145907
Klra2	4.02933	1.57622	0.555301	2.8385	0.00453263	0.0147495
4930509E16Rik	9.726	1.57385	0.383839	4.10029	4.12632e-05	0.000351728
2010300C02Rik	57.8654	1.57252	0.259034	6.07072	1.27341e-09	1.01892e-07
Myl4	450.429	1.57247	0.320016	4.91372	8.93644e-07	1.77009e-05
Dock3	6.72637	1.5679	0.414001	3.7872	0.000152355	0.000999397
C730002L08Rik	5.209	1.5662	0.553892	2.82762	0.00468947	0.0151835
Gm4951	22.7736	1.56438	0.391741	3.9934	6.51313e-05	0.000509297
Spp1	54.9358	1.56077	0.418093	3.73307	0.000189161	0.00118047
Baiap3	6.57636	1.55882	0.433379	3.59691	0.000322023	0.00179046
Cdc20	13.2675	1.55652	0.462809	3.36321	0.000770421	0.00356902
Ttc9	218.276	1.54602	0.350777	4.40743	1.04606e-05	0.000119911
BC006965	4.25031	1.53553	0.575139	2.66984	0.0075888	0.0224196
Gbp8	5.58658	1.53483	0.658179	2.33193	0.0197042	0.0486746
Rps15a-ps6	13.4129	1.53199	0.427205	3.58608	0.000335688	0.00185115
E130306D19Rik	6.27435	1.52883	0.480311	3.18301	0.00145754	0.00595088
5730408K05Rik	7.12772	1.52784	0.489551	3.1209	0.001803	0.00706128
S100a4	294.154	1.52704	0.544188	2.8061	0.00501454	0.0160273
Pabpc1l	7.14188	1.52261	0.419126	3.63282	0.000280345	0.00160454
Lat	7.35877	1.51788	0.437685	3.46797	0.000524399	0.00263452
Gdnf	42.893	1.51023	0.284321	5.31172	1.08596e-07	3.42152e-06
A730090N16Rik	6.39604	1.50543	0.563381	2.67213	0.00753716	0.0222964
Isg15	43.712	1.50301	0.402819	3.73123	0.000190545	0.00118727
Gm12060	4.12828	1.50208	0.535557	2.80472	0.00503609	0.0160898
Myl2	70.6028	1.50044	0.364582	4.11552	3.86308e-05	0.000333542
E130006D01Rik	7.4582	1.49539	0.460593	3.24666	0.00116769	0.00497848
Caly	12.2943	1.49019	0.346204	4.30438	1.67457e-05	0.0001735
Tmem202	9.97013	1.48996	0.437429	3.40617	0.000658807	0.0031448
Dbf4	19.4898	1.48938	0.333011	4.47247	7.73219e-06	9.53283e-05
Fhit	20.268	1.4881	0.344576	4.31864	1.56991e-05	0.000164983
Snhg11	27.4264	1.48803	0.27455	5.4199	5.96326e-08	2.14664e-06
Kif22	12.9463	1.48481	0.53378	2.78169	0.00540774	0.0170215
2310001K24Rik	7.20744	1.484	0.418481	3.54617	0.000390879	0.00208507
Zbp1	23.7365	1.48231	0.450283	3.29195	0.000994946	0.00437954
Nme4	53.8067	1.47153	0.23257	6.32725	2.49567e-10	2.68917e-08
Psmb8	289.374	1.47098	0.346844	4.24104	2.2249e-05	0.000215594
Cxcr3	3.71753	1.47079	0.560125	2.62582	0.00864398	0.024922
Chrnd	122.06	1.46737	0.625004	2.34778	0.0188858	0.0470051
Nuf2	5.3735	1.46649	0.599738	2.44522	0.0144766	0.0379591
1700093K21Rik	5.51554	1.466	0.454252	3.22728	0.00124972	0.00524381
Mmp8	6.89062	1.46526	0.498943	2.93673	0.00331691	0.0114824
Gp1bb	8.82924	1.45948	0.496534	2.93933	0.00328927	0.0114087
Bst2	316.873	1.45833	0.300292	4.85638	1.19553e-06	2.24953e-05
Pomc	4.85201	1.4556	0.551512	2.63929	0.00830791	0.0241339
Accn1	6.42037	1.44962	0.470472	3.08121	0.00206164	0.00782949
Havcr2	4.69801	1.44924	0.615494	2.35459	0.0185429	0.046322
D330050I16Rik	15.8583	1.44691	0.345272	4.19064	2.78174e-05	0.000256752
Gstm6	6.85024	1.44377	0.474356	3.04364	0.00233737	0.00862531
E030010A14Rik	30.2495	1.43973	0.287076	5.01517	5.29872e-07	1.16999e-05
Gm6251	3.11175	1.43961	0.598889	2.4038	0.0162256	0.0417205
Ifi47	86.258	1.43822	0.352231	4.08317	4.44256e-05	0.000373013
Spint2	130.402	1.43636	0.170984	8.40054	4.44438e-17	3.42069e-14
Ect2	6.01554	1.43261	0.561397	2.55186	0.010715	0.0297264
Plaur	33.9846	1.43239	0.365288	3.92126	8.80863e-05	0.000647154
Crabp2	4.64384	1.43229	0.568152	2.52096	0.0117036	0.0318836
Marveld2	25.1641	1.43218	0.305634	4.68592	2.78708e-06	4.32734e-05
Clcnkb	7.10743	1.43065	0.486591	2.94014	0.00328063	0.0113812
2310034G01Rik	16.6281	1.42789	0.325476	4.3871	1.14874e-05	0.000129478
4921536K21Rik	6.12004	1.42002	0.501321	2.83256	0.00461774	0.0149903
4833427F10Rik	12.8025	1.41494	0.423162	3.34372	0.000826636	0.00377108
4930579G22Rik	4.17667	1.41087	0.560717	2.51619	0.011863	0.0322365
Serpinb6c	3.57581	1.40872	0.576132	2.44514	0.0144797	0.0379591
Nudt17	13.7222	1.40442	0.348453	4.03044	5.56735e-05	0.000449476
Slfn1	9.39254	1.40429	0.559434	2.51019	0.0120665	0.0326903
Nrp	10.92	1.40029	0.430869	3.24991	0.0011544	0.0049309
Sostdc1	5.13512	1.39829	0.581025	2.40659	0.0161024	0.0414562
2810408I11Rik	3.61553	1.39584	0.568561	2.45504	0.0140867	0.0371305
Mt1	480.869	1.38937	0.464681	2.98994	0.00279033	0.00996248
Gm4013	7.83478	1.38909	0.379475	3.66055	0.000251673	0.00148081
Acbd7	6.9056	1.38887	0.471768	2.94396	0.00324041	0.0112682
Myl12a	6687.77	1.38868	0.196623	7.06265	1.63355e-12	4.00047e-10
Cgref1	49.4054	1.38781	0.363848	3.81425	0.000136596	0.000917899
Prelid2	8.61087	1.38461	0.405047	3.41838	0.000629946	0.00303482
Sema4f	9.06039	1.38357	0.48096	2.87668	0.00401887	0.013396
AI662270	28.9345	1.37858	0.42853	3.21701	0.00129536	0.00540168
Celf4	13.7101	1.37857	0.334321	4.1235	3.73163e-05	0.000325513
Snx20	14.143	1.37501	0.448842	3.06346	0.00218791	0.00818875
Ggt6	7.63025	1.37285	0.482852	2.84321	0.00446613	0.014583
Emb	93.4495	1.37098	0.436786	3.13878	0.0016965	0.00671879
2310050B05Rik	756.47	1.36988	0.200776	6.82293	8.92038e-12	1.62e-09
Apol11b	10.8294	1.36701	0.561731	2.43357	0.0149507	0.0389505
Tnf	4.90332	1.36477	0.540445	2.52526	0.0115612	0.0316023
Rrm2	33.5546	1.36236	0.350673	3.88499	0.000102336	0.000731237
Depdc7	88.0604	1.36182	0.135901	10.0207	1.23631e-23	4.9956e-20
2210403K04Rik	1077.04	1.36167	0.124072	10.9748	5.05003e-28	8.16237e-24
Rbm3	1292.88	1.35511	0.170788	7.93446	2.11413e-15	1.1783e-12
8430403D17Rik	6.87289	1.35483	0.468261	2.89331	0.003812	0.0128575
Tesc	17.1536	1.35333	0.350503	3.86112	0.00011287	0.000791459
Hspb7	10211.9	1.3492	0.279495	4.82728	1.38414e-06	2.50524e-05
Spata24	77.6553	1.34494	0.224938	5.97914	2.24318e-09	1.58325e-07
G0s2	642.149	1.3441	0.446502	3.01028	0.00261009	0.009442
Tnni1	125.104	1.34319	0.4247	3.16267	0.00156327	0.00628848
G530011O06Rik	10.6602	1.34201	0.404623	3.3167	0.000910861	0.00407367
Ms4a6c	50.8562	1.34091	0.492386	2.7233	0.00646343	0.0196924
Gstm7	60.258	1.34045	0.233102	5.75051	8.89735e-09	4.63896e-07
Cfd	887.074	1.34018	0.569776	2.35211	0.0186671	0.0465756
Diras1	6.10933	1.33896	0.538046	2.48857	0.0128258	0.0343901
Ccl12	6.53887	1.33795	0.525626	2.54544	0.0109139	0.0301438
9330133O14Rik	59.8856	1.337	0.359031	3.72391	0.000196161	0.00120967
Psmg4	144.195	1.33233	0.205596	6.48034	9.1518e-11	1.21794e-08
Pmaip1	5.7089	1.33229	0.537864	2.477	0.0132491	0.0352793
Frmpd4	3.82337	1.33137	0.545168	2.44212	0.0146012	0.0382308
Rps19-ps3	11.983	1.33	0.395661	3.36147	0.000775274	0.00358407
Nkapl	7.42481	1.32827	0.432673	3.06991	0.00214123	0.00806728
Mdfi	55.1693	1.32822	0.415894	3.19366	0.00140483	0.00578062
Wdr86	5.60536	1.32727	0.499972	2.65469	0.00793813	0.0232519
Car3	96758	1.32361	0.173335	7.63614	2.23833e-14	9.04454e-12
Cdt1	19.0683	1.32189	0.348555	3.7925	0.000149136	0.00098329
Xrra1	4.53594	1.32168	0.553747	2.38679	0.0169964	0.0431847
Olfr920	9.44669	1.3152	0.388855	3.38222	0.000719016	0.00337735
Prrxl1	13.2978	1.31068	0.435021	3.01291	0.00258752	0.00937714
Acox2	7.46122	1.30522	0.422283	3.09085	0.00199583	0.00763338
Rpl3	1265.56	1.30029	0.217393	5.9813	2.2137e-09	1.5693e-07
Sh2d4a	95.403	1.29801	0.349668	3.71213	0.000205525	0.00125497
Cdhr3	26.3577	1.29785	0.291768	4.44822	8.65865e-06	0.000104505
1700112E06Rik	46.0433	1.29701	0.198244	6.54249	6.05019e-11	8.81043e-09
Gbp3	245.362	1.2966	0.373596	3.4706	0.000519302	0.00261479
8430408G22Rik	190.998	1.29431	0.273828	4.72671	2.28182e-06	3.72159e-05
Tnnt2	142.09	1.2925	0.299304	4.31835	1.572e-05	0.000165096
Adora1	23.2954	1.29071	0.422386	3.05576	0.00224489	0.00834695
2810029C07Rik	11.5742	1.28794	0.367872	3.50105	0.000463427	0.00238775
Ptpn18	57.0526	1.28631	0.316961	4.05826	4.94402e-05	0.000407878
Rassf7	9.35955	1.28471	0.461975	2.78091	0.00542063	0.0170554
Gp49a	34.8776	1.28221	0.441939	2.90133	0.00371579	0.0125803
Mycl1	9.6053	1.28205	0.522291	2.45466	0.0141017	0.0371578
Gm4902	8.31507	1.28005	0.444191	2.88176	0.00395457	0.0132444
Bend5	14.4105	1.27902	0.297382	4.30094	1.70075e-05	0.000175538
Ptpn7	11.4016	1.27676	0.471969	2.70517	0.00682695	0.0205215
2810008D09Rik	160.483	1.27492	0.221695	5.75078	8.88337e-09	4.63896e-07
Gsta3	21.1287	1.2742	0.459002	2.77602	0.00550291	0.0172706
Ctxn3	1178.13	1.27295	0.202802	6.2768	3.45603e-10	3.44813e-08
1700012D01Rik	13.1903	1.26394	0.33633	3.75804	0.000171249	0.00109317
Ctla2a	275.241	1.2639	0.260362	4.85441	1.20747e-06	2.26408e-05
Ostn	320.157	1.2615	0.232581	5.42392	5.83064e-08	2.10359e-06
Stk32c	8.96265	1.256	0.42909	2.92713	0.00342107	0.0117874
Ifit1	94.0597	1.25363	0.290425	4.31654	1.58495e-05	0.000165843
Mtap7d2	6.74234	1.25131	0.452937	2.76266	0.00573322	0.0178961
E2f8	5.98961	1.25041	0.510036	2.45162	0.0142215	0.0374125
BC049352	28.5738	1.24923	0.434204	2.87706	0.00401395	0.0133823
Cage1	8.35082	1.24058	0.509465	2.43506	0.0148892	0.0388339
Rhpn2	79.6496	1.2404	0.26192	4.7358	2.18194e-06	3.58766e-05
Kcnk5	49.4161	1.23887	0.398361	3.10991	0.00187143	0.0072764
Sox9	69.7232	1.23698	0.266108	4.64843	3.34471e-06	4.99601e-05
Pak1	845.255	1.23399	0.216955	5.68777	1.28707e-08	6.24556e-07
5031426D15Rik	31.783	1.22963	0.391146	3.14366	0.00166851	0.00663471
Tmsb15b1	7.58106	1.22959	0.403699	3.0458	0.00232061	0.00857129
2610002J02Rik	71.4035	1.22944	0.212829	5.77663	7.62108e-09	4.06533e-07
Igtp	448.882	1.22809	0.272745	4.50269	6.70984e-06	8.56644e-05
Ier3	209.214	1.22717	0.15131	8.11033	5.04808e-16	3.13816e-13
Rtn4rl2	16.3806	1.22551	0.354495	3.45707	0.00054609	0.00272311
Ifitm6	7.39065	1.22292	0.501183	2.44006	0.0146846	0.0384182
Arrdc2	1073.5	1.22175	0.455383	2.68291	0.00729851	0.0217208
C1qtnf4	317.507	1.22112	0.272782	4.47653	7.58647e-06	9.38898e-05
Oas1a	18.1848	1.22043	0.419267	2.91087	0.0036042	0.0122766
Kcng2	4.78062	1.21557	0.48558	2.50333	0.0123032	0.0332093
Ccdc11	5.90748	1.21404	0.467067	2.59929	0.00934174	0.0265735
Ifitm5	5.70723	1.21368	0.472007	2.57132	0.0101312	0.0284093
3110003A17Rik	52.376	1.21169	0.308009	3.93396	8.35589e-05	0.000620378
Cyp1a1	40.1088	1.21147	0.240237	5.0428	4.58766e-07	1.03998e-05
Fam196b	27.823	1.21065	0.241141	5.02053	5.15303e-07	1.1425e-05
Amica1	7.87709	1.20852	0.392419	3.07966	0.00207237	0.00785917
4933408B17Rik	6.66201	1.20714	0.414447	2.91265	0.00358372	0.0122305
Cyr61	1345.7	1.20679	0.140726	8.57547	9.86811e-18	8.86102e-15
Golga7b	136.034	1.20521	0.195071	6.17832	6.4789e-10	5.85019e-08
Pglyrp1	7.23569	1.20316	0.517925	2.32304	0.0201768	0.0496223
Psmb9	116.76	1.20194	0.335474	3.58282	0.000339902	0.00186675
2610019E17Rik	9.70571	1.20118	0.401036	2.9952	0.00274267	0.00983794
Arxes2	6.12021	1.20107	0.48998	2.45126	0.0142358	0.0374378
Gabrd	17.6424	1.20057	0.255478	4.69931	2.61037e-06	4.11624e-05
Tmem8	61.6322	1.19805	0.193301	6.19784	5.72443e-10	5.28708e-08
Gstm2	1140.76	1.1977	0.145947	8.20641	2.27896e-16	1.60152e-13
Hpgd	101.839	1.19548	0.508622	2.35042	0.0187522	0.0467445
Amy1	1552.08	1.19282	0.133041	8.96582	3.07975e-19	4.52527e-16
Rab13	251.642	1.19244	0.23577	5.05764	4.24479e-07	9.84341e-06
Lrrn3	11.1669	1.19179	0.338641	3.51934	0.000432618	0.00225986
Cdca3	23.4158	1.19089	0.396218	3.00565	0.00265012	0.00956281
Fbxl13	5.7053	1.19062	0.487037	2.44461	0.0145009	0.0380051
Olfr1372-ps1	12.2208	1.19039	0.317763	3.74617	0.000179556	0.00113677
Mgst2	6.7725	1.18916	0.46399	2.56289	0.0103804	0.0289609
Sertad1	205.248	1.18785	0.208869	5.68704	1.29258e-08	6.24556e-07
Gm5111	13.4619	1.18745	0.398891	2.97687	0.00291204	0.010323
Xcr1	14.8792	1.18744	0.411666	2.88447	0.00392077	0.0131558
H2-Q10	15.1437	1.18586	0.464159	2.55485	0.0106232	0.0295126
Gale	17.3367	1.18481	0.316262	3.7463	0.000179464	0.00113663
Fgfbp1	42.0804	1.18416	0.397206	2.98123	0.0028709	0.0101983
Spdya	7.07086	1.18149	0.443366	2.66482	0.00770305	0.0227032
Gadd45g	1212.6	1.18032	0.23491	5.02455	5.04625e-07	1.125e-05
Lat2	38.5558	1.17944	0.385266	3.06136	0.00220332	0.00822995
Ccdc122	75.2016	1.17866	0.214255	5.5012	3.77223e-08	1.47628e-06
Irf7	119.55	1.17849	0.249731	4.71903	2.36972e-06	3.82282e-05
1700011J10Rik	28.772	1.17657	0.30761	3.82487	0.000130842	0.000889753
Lrat	6.86498	1.17502	0.505605	2.32399	0.0201259	0.0495499
Tnnc1	80.1402	1.17482	0.282062	4.1651	3.11217e-05	0.00028086
Gm6402	8.56486	1.17471	0.381178	3.0818	0.00205751	0.00781809
Ly96	12.8554	1.17433	0.41575	2.82461	0.00473378	0.0152994
Glul	5339.94	1.17096	0.232986	5.02587	5.01164e-07	1.12038e-05
Chkb	11.6666	1.17069	0.334248	3.50246	0.000460991	0.00237671
Fhl2	27.5633	1.16894	0.403419	2.89758	0.00376049	0.0127077
Rpl12	3997.55	1.16818	0.19405	6.01996	1.74456e-09	1.30544e-07
Upp1	12.8625	1.16777	0.387906	3.01044	0.00260866	0.00943894
Rpl38	1162.88	1.16717	0.205091	5.69101	1.26293e-08	6.167e-07
Dcxr	207.396	1.16678	0.184926	6.30946	2.80012e-10	2.93886e-08
Gmfg	20.911	1.16401	0.423873	2.74613	0.00603035	0.0186614
Rasd1	24.8726	1.1555	0.309339	3.7354	0.00018742	0.00117322
Cstb	207.621	1.1554	0.225733	5.11845	3.0806e-07	7.74367e-06
Rps20	4995.37	1.15359	0.189987	6.07195	1.26369e-09	1.01617e-07
Aif1	22.6529	1.14987	0.442467	2.59878	0.00935557	0.0266009
Snhg3	233.532	1.14917	0.237211	4.84451	1.26925e-06	2.34768e-05
Ccdc104	274.406	1.14823	0.132581	8.66054	4.69533e-18	4.74316e-15
Prr15	11.6337	1.14681	0.403907	2.83928	0.00452152	0.0147307
Snhg8	293.12	1.14673	0.254396	4.50766	6.55479e-06	8.40167e-05
Rpl13a	7462.94	1.14491	0.187656	6.10108	1.05355e-09	8.76255e-08
Mcm10	7.25348	1.14418	0.391402	2.9233	0.00346347	0.0119031
3632451O06Rik	173.286	1.14154	0.184137	6.19943	5.66697e-10	5.26409e-08
Bola2	335.799	1.13499	0.207355	5.47367	4.40816e-08	1.65311e-06
Rmrp	9.47686	1.13129	0.412072	2.74536	0.00604439	0.0186972
Tspo	550.694	1.13064	0.199217	5.67542	1.3835e-08	6.52387e-07
Clec18a	16.572	1.12723	0.369259	3.05268	0.00226806	0.00841206
Sel1l2	6.8941	1.12664	0.480312	2.34564	0.0189944	0.0472245
Ddt	379.268	1.12605	0.216608	5.19855	2.00853e-07	5.57564e-06
Rps21	3523.76	1.12504	0.213588	5.26732	1.38433e-07	4.13583e-06
Tmem178	21.3243	1.12113	0.268442	4.17642	2.96129e-05	0.000269349
Hspb3	579.706	1.12064	0.174273	6.4304	1.27273e-10	1.57031e-08
Fau	2505.57	1.11928	0.21011	5.32711	9.97894e-08	3.19385e-06
A530013C23Rik	93.3083	1.11728	0.211227	5.28947	1.22671e-07	3.75768e-06
Pnmt	25.2928	1.11592	0.265546	4.20236	2.64149e-05	0.000247546
Slitrk5	7.32115	1.11239	0.474704	2.34333	0.0191126	0.0474891
Cyba	193.687	1.11185	0.362826	3.06441	0.00218097	0.00817375
Fxyd7	25.2958	1.11105	0.309045	3.59512	0.00032424	0.00180031
Akr1b8	62.5504	1.11028	0.312998	3.54724	0.000389294	0.00207936
Tssk1	7.14048	1.10849	0.39131	2.83276	0.00461473	0.0149835
Gpr132	11.3073	1.10495	0.367783	3.00434	0.00266156	0.00959599
1190005I06Rik	18.0966	1.10302	0.313267	3.52103	0.000429872	0.00224928
Asl	166.613	1.10301	0.156258	7.05887	1.67865e-12	4.04956e-10
3110070M22Rik	5.24672	1.10292	0.464303	2.37542	0.0175288	0.0442893
Cebpd	553.294	1.1028	0.350948	3.14235	0.00167598	0.00665736
BC002163	23.4064	1.10231	0.323365	3.40888	0.000652308	0.00311746
Clec12a	28.8202	1.10178	0.42349	2.60167	0.00927708	0.0264128
2810001G20Rik	58.9059	1.10172	0.314237	3.506	0.000454901	0.00235282
Id2	131.332	1.10013	0.250801	4.38645	1.15214e-05	0.00012968
Lgi1	7.45275	1.09833	0.376756	2.91522	0.00355433	0.0121584
Hes6	238.161	1.09808	0.219996	4.99137	5.99512e-07	1.30592e-05
Plb1	21.4653	1.09762	0.238517	4.60183	4.18789e-06	6.01679e-05
Fbxl22	159.264	1.09652	0.224591	4.88228	1.04867e-06	2.01781e-05
Tppp2	11.7531	1.09387	0.319098	3.428	0.000608052	0.0029539
2010107G23Rik	52.3262	1.09178	0.204025	5.35118	8.73806e-08	2.87644e-06
Rps27a	2979.92	1.09043	0.195818	5.56858	2.56826e-08	1.07669e-06
Nr2c2ap	16.234	1.08999	0.318564	3.42158	0.000622578	0.00300559
Sidt1	11.3487	1.08998	0.41452	2.6295	0.00855113	0.0247293
2410006H16Rik	160.111	1.08998	0.238815	4.56409	5.0166e-06	6.85985e-05
Ddit4	348.381	1.08988	0.234158	4.65445	3.24843e-06	4.89323e-05
Snhg1	134.87	1.08821	0.180644	6.02403	1.70122e-09	1.2849e-07
Cyp46a1	11.4103	1.08796	0.345162	3.15202	0.00162143	0.00647729
Ccdc99	7.76232	1.0854	0.444854	2.4399	0.0146915	0.03843
Fetub	8.81214	1.08529	0.437369	2.4814	0.0130867	0.0348986
Tcap	84692.2	1.08463	0.178797	6.0663	1.30888e-09	1.04214e-07
Dupd1	1443.14	1.0844	0.308318	3.51714	0.000436216	0.00227364
Kcnn4	24.6324	1.08411	0.323292	3.35335	0.000798409	0.0036661
Cst6	601.137	1.08365	0.183264	5.91304	3.35841e-09	2.14842e-07
Tuba1c	52.0269	1.08279	0.291224	3.71805	0.000200767	0.00123337
Ak4	90.0269	1.08134	0.179297	6.031	1.62951e-09	1.24235e-07
Ifi27l2a	117.363	1.08031	0.427358	2.52788	0.0114753	0.0314098
Scx	223.15	1.07953	0.19596	5.50893	3.61015e-08	1.42154e-06
S100a13	250.627	1.07862	0.251006	4.29717	1.72995e-05	0.000177983
E2f2	194.893	1.07637	0.225862	4.76562	1.88278e-06	3.2033e-05
Cxcr5	24.8447	1.0745	0.308236	3.48598	0.000490342	0.00249424
Fam110a	88.1255	1.07216	0.27061	3.962	7.43238e-05	0.000565848
H2-K1	3225	1.07169	0.208411	5.14219	2.71549e-07	7.03373e-06
Rpl39	671.388	1.07143	0.22059	4.85709	1.19121e-06	2.244e-05
Nme5	14.3283	1.06896	0.3153	3.39028	0.000698214	0.00329881
Gm10638	33.2595	1.06879	0.321737	3.32194	0.000893953	0.00401249
Asf1b	13.7314	1.0683	0.379419	2.81563	0.00486823	0.0156556
Rpl36a	1383.78	1.06738	0.203686	5.24032	1.60295e-07	4.62652e-06
Thrsp	342.617	1.06718	0.286409	3.72606	0.000194498	0.00120221
Nt5c	118.266	1.06668	0.198006	5.38711	7.16009e-08	2.43127e-06
Id1	324.318	1.06583	0.225303	4.73067	2.23778e-06	3.66828e-05
Rps12	3387.47	1.06526	0.206196	5.16627	2.38817e-07	6.35913e-06
Ubxn11	27.6826	1.06521	0.249682	4.26628	1.9876e-05	0.000196969
Mthfd1l	27.4495	1.06411	0.345893	3.07641	0.00209513	0.00792686
H2afj	401.225	1.06318	0.171202	6.21008	5.2957e-10	4.97642e-08
Cebpb	1723	1.06251	0.211427	5.02542	5.02326e-07	1.12142e-05
Car1	14.7324	1.06092	0.294227	3.6058	0.00031119	0.00174218
Nnmt	39.1602	1.05985	0.415356	2.55167	0.0107209	0.0297276
Uap1l1	190.851	1.05926	0.20201	5.24363	1.57451e-07	4.57437e-06
E230016M11Rik	15.0436	1.05834	0.291899	3.62569	0.000288194	0.00163881
Tuba1b	139.703	1.05777	0.267643	3.95217	7.74445e-05	0.000584104
Mpv17l	19.2175	1.05722	0.276486	3.82377	0.000131426	0.000891785
Ifit3	96.4511	1.0571	0.295623	3.57584	0.000349104	0.0019037
Ctla2b	59.875	1.0555	0.234846	4.49442	6.97604e-06	8.83482e-05
Katnal2	31.3396	1.05545	0.300346	3.5141	0.000441239	0.00229538
0610040B10Rik	26.5262	1.05488	0.277781	3.79752	0.000146152	0.000966946
Chrna1	502.518	1.05401	0.20345	5.18069	2.21068e-07	6.01537e-06
Wnt5b	84.9778	1.05373	0.191408	5.50518	3.68792e-08	1.44679e-06
Hoxc8	61.2372	1.05275	0.324266	3.24656	0.00116808	0.00497882
C920006O11Rik	32.9059	1.05069	0.238638	4.40284	1.06841e-05	0.000122127
Eef1b2	3470.98	1.04753	0.188524	5.55648	2.75271e-08	1.13596e-06
Gins1	36.4854	1.04563	0.206344	5.06743	4.03232e-07	9.48171e-06
Immp2l	136.462	1.04376	0.211614	4.93237	8.1237e-07	1.6311e-05
Map1lc3a	6735.43	1.04273	0.174123	5.98849	2.11801e-09	1.50808e-07
Cda	16.6247	1.04101	0.340761	3.05496	0.00225091	0.0083597
Atpif1	449.811	1.03958	0.1974	5.26634	1.39171e-07	4.14799e-06
Rhoc	864.325	1.03916	0.137627	7.55054	4.33464e-14	1.7088e-11
Psat1	43.6194	1.03846	0.320704	3.23806	0.00120346	0.00509204
Bub1b	24.8523	1.03834	0.360487	2.88039	0.00397185	0.0132912
H2-T10	20.4486	1.03751	0.322056	3.22153	0.00127508	0.00532948
Nradd	31.1734	1.03734	0.220503	4.70444	2.54565e-06	4.03782e-05
Cth	64.4203	1.03729	0.197807	5.24397	1.57157e-07	4.57437e-06
Slc10a6	48.0246	1.03568	0.277935	3.72633	0.00019429	0.00120221
Nppa	7.20025	1.03547	0.430393	2.40588	0.0161336	0.0415037
Rpl41	3060.27	1.0353	0.20279	5.10527	3.3032e-07	8.16355e-06
Hist1h4h	255.713	1.0351	0.226372	4.57256	4.81807e-06	6.6845e-05
Tyms	17.6675	1.03365	0.403236	2.56339	0.0103656	0.028926
Spc24	51.4941	1.03017	0.254117	4.05391	5.0369e-05	0.000413886
Plekho1	548.162	1.02829	0.215483	4.77202	1.8239e-06	3.13281e-05
Pomp	2011.36	1.0263	0.170564	6.0171	1.77574e-09	1.32264e-07
Rps14	5702.07	1.02582	0.21114	4.85848	1.18289e-06	2.23353e-05
Matk	21.5893	1.0251	0.378053	2.71153	0.00669737	0.0202394
A930015D03Rik	19.2491	1.02491	0.287962	3.5592	0.000371992	0.00200551
1810027O10Rik	782.61	1.02274	0.222313	4.60044	4.21599e-06	6.03428e-05
Ift27	215.132	1.02148	0.215377	4.74274	2.10842e-06	3.4845e-05
Coro1a	146.061	1.02128	0.346185	2.9501	0.00317671	0.0110849
2410004N09Rik	71.7136	1.02029	0.265539	3.84235	0.000121862	0.000841736
Grhl1	20.5629	1.01969	0.278043	3.66737	0.00024506	0.00144876
H2-Q4	676.66	1.01925	0.249805	4.08019	4.4998e-05	0.000376865
Erdr1	156.087	1.01871	0.39951	2.54989	0.0107758	0.0298542
Hmgb2	86.4401	1.0183	0.221836	4.59034	4.42517e-06	6.25757e-05
Rps13	2923.16	1.01696	0.187193	5.4327	5.55073e-08	2.02694e-06
Psmb4	4173.21	1.0168	0.17083	5.95215	2.64636e-09	1.75741e-07
1700029F09Rik	72.2354	1.0167	0.192763	5.27434	1.33234e-07	4.01018e-06
Atp5l	343.22	1.01661	0.170153	5.97468	2.30538e-09	1.60611e-07
Tnnt1	163.951	1.01559	0.307852	3.29897	0.000970399	0.00429233
Romo1	1680.59	1.01523	0.167811	6.04983	1.44999e-09	1.13768e-07
Lhfpl4	20.4329	1.01485	0.227497	4.46092	8.16088e-06	9.99275e-05
Fbxo5	15.1356	1.01432	0.367658	2.75888	0.00580003	0.0180593
Tnfaip8l1	28.5239	1.01229	0.345272	2.93185	0.00336953	0.0116371
Ros1	12.0564	1.01136	0.399263	2.53306	0.0113071	0.0310233
2310009B15Rik	177.515	1.01097	0.211623	4.77722	1.77735e-06	3.05934e-05
Atf3	123.007	1.01092	0.293938	3.43921	0.000583413	0.00286617
Nudt16	208.034	1.00892	0.171867	5.87038	4.34785e-09	2.64189e-07
B2m	3115.92	1.00785	0.242616	4.1541	3.26569e-05	0.000292105
Rdh9	18.9695	1.00706	0.306236	3.28852	0.00100715	0.00442715
Tmem37	1105.81	1.00635	0.226595	4.4412	8.94569e-06	0.000106945
Tbcb	698.375	1.00553	0.161638	6.22089	4.94351e-10	4.73546e-08
Crip1	616.124	1.00448	0.306131	3.28122	0.00103361	0.00452129
Kif20b	11.7	1.00431	0.423415	2.37194	0.017695	0.0445767
Camk2n2	30.2049	1.00388	0.308273	3.25648	0.00112802	0.00485287
Pafah1b3	16.2564	1.0038	0.377803	2.65693	0.00788549	0.0231313
Rps19	1469.37	1.00203	0.185988	5.38764	7.13897e-08	2.4292e-06
Rpl35	1708.81	1.00138	0.167812	5.9673	2.41214e-09	1.64504e-07
Gm13889	280.19	0.998764	0.190981	5.22966	1.69823e-07	4.84955e-06
Lpxn	17.3887	0.995346	0.385073	2.58483	0.00974284	0.0275207
Ndufa2	4145.88	0.994404	0.2212	4.49549	6.94103e-06	8.81288e-05
Chchd6	93.5052	0.993387	0.209027	4.75244	2.00979e-06	3.37324e-05
Scn3b	63.1335	0.993052	0.393338	2.52468	0.0115804	0.031628
B930059L03Rik	10.9617	0.992807	0.355385	2.79361	0.00521238	0.0165354
Cyp4f18	17.1568	0.991362	0.424833	2.33353	0.0196201	0.0485041
Coro2a	17.9849	0.991015	0.383853	2.58176	0.00982983	0.0277132
Rplp1	8268.56	0.990422	0.198984	4.9774	6.44427e-07	1.37051e-05
Bex1	251.331	0.989997	0.208401	4.75044	2.02975e-06	3.38215e-05
Gsta4	402.327	0.98979	0.192139	5.15143	2.58502e-07	6.76079e-06
Apitd1	15.004	0.98856	0.41805	2.36469	0.0180451	0.0453448
2410022L05Rik	117.771	0.987804	0.227498	4.34204	1.41166e-05	0.000152416
E030030I06Rik	8.05759	0.987119	0.413203	2.38894	0.0168969	0.0429748
Id3	584.064	0.98683	0.197939	4.98552	6.17948e-07	1.3335e-05
Neu2	317.833	0.986687	0.197102	5.00597	5.55808e-07	1.21728e-05
Spa17	84.8946	0.986314	0.241782	4.07935	4.5161e-05	0.000377619
Pfn4	10.7332	0.984858	0.404987	2.43183	0.0150228	0.0391004
2310008N11Rik	80.5568	0.980715	0.394458	2.48623	0.0129103	0.0345479
Avpi1	342.291	0.980516	0.15869	6.17881	6.45857e-10	5.85019e-08
Rplp2	4054.93	0.979052	0.192743	5.07957	3.78295e-07	9.03158e-06
Dpep2	13.4476	0.978585	0.329909	2.96623	0.00301479	0.0106231
Rpl35a	1682.4	0.978531	0.200751	4.87435	1.09165e-06	2.09304e-05
Ampd3	363.393	0.978242	0.31438	3.11165	0.00186044	0.00724398
Slc37a2	40.443	0.978231	0.353073	2.77062	0.00559504	0.0175325
D130020L05Rik	28.3829	0.977623	0.229712	4.25587	2.08239e-05	0.000204605
Mvd	192.372	0.976919	0.253619	3.85191	0.000117199	0.000816153
Dnase2a	134.664	0.976787	0.193913	5.03725	4.72277e-07	1.06463e-05
Use1	1527.98	0.976067	0.152406	6.40439	1.50974e-10	1.78263e-08
Snrpe	383.245	0.975868	0.2168	4.50123	6.75603e-06	8.61181e-05
Rps8	4520.89	0.975854	0.189506	5.14946	2.61242e-07	6.80395e-06
Bid	23.0076	0.97529	0.305847	3.18882	0.00142853	0.00585528
Srp14	1934.32	0.974669	0.177837	5.48069	4.2368e-08	1.60373e-06
Rpl36	2923.29	0.973908	0.20588	4.73046	2.24016e-06	3.66845e-05
Ltc4s	20.8674	0.971449	0.415781	2.33644	0.0194681	0.0481729
Hopx	91.2236	0.971005	0.217831	4.45762	8.28764e-06	0.000100944
Rps23	2523.29	0.970919	0.198641	4.8878	1.01971e-06	1.97148e-05
Rps29	3046.55	0.969603	0.187597	5.16854	2.35926e-07	6.29253e-06
Rpl18	2596.08	0.968899	0.196145	4.93971	7.82398e-07	1.5847e-05
Napsa	18.1486	0.96816	0.417879	2.31685	0.0205122	0.0502559
Lingo1	11.8109	0.967505	0.340283	2.84324	0.00446574	0.014583
1110046J04Rik	53.0549	0.966777	0.317451	3.04543	0.00232344	0.0085798
Clic1	331.09	0.965787	0.288209	3.351	0.000805203	0.00368996
Tekt1	106.015	0.96507	0.230999	4.1778	2.94341e-05	0.000268025
Rpl19	3371.21	0.964923	0.174178	5.53988	3.02687e-08	1.23232e-06
Ifitm3	955.79	0.962325	0.208964	4.60522	4.12031e-06	5.94612e-05
Rbp4	25.7448	0.961537	0.409075	2.35052	0.0187474	0.0467397
Gm129	223.236	0.961311	0.313127	3.07004	0.00214032	0.00806574
Traf1	15.2538	0.959708	0.371875	2.58073	0.00985922	0.0277791
Tubb6	752.405	0.958858	0.266697	3.5953	0.000324015	0.00179968
Rpl37a	2274.92	0.95872	0.200474	4.78228	1.73322e-06	3.00257e-05
Wfikkn1	10.9928	0.958541	0.342563	2.79815	0.0051397	0.0163529
Nfkbia	804.049	0.958351	0.164721	5.81802	5.95491e-09	3.37717e-07
Tnfrsf23	195.02	0.958316	0.329578	2.90771	0.00364088	0.0123655
Ngfrap1	37.8023	0.956252	0.298748	3.20086	0.00137016	0.00566248
Myc	119.755	0.956108	0.257801	3.7087	0.000208326	0.00126809
Fbxw10	8.72058	0.953846	0.375425	2.54071	0.0110628	0.0304926
Rps27	13.7182	0.952587	0.313602	3.03757	0.00238497	0.00876014
Riiad1	129.503	0.951589	0.229329	4.14944	3.33286e-05	0.000296635
Nudt10	34.6054	0.950908	0.222723	4.26946	1.95944e-05	0.000195135
Rtp4	99.8972	0.950311	0.277489	3.42468	0.000615514	0.00298129
Tubb3	11.2031	0.950204	0.353891	2.68501	0.00725266	0.0216043
Gpx1	1407.9	0.950193	0.211386	4.49506	6.95515e-06	8.81695e-05
Art5	765.272	0.950028	0.161382	5.88681	3.93713e-09	2.41808e-07
Log2fc≤1.0, padj≤0.05
Gene ID	base Mean	log2 Fold Change	lfc SE	stat	pvalue	padj
9130404H23Rik	5.35196	-4.51201	0.94887	-4.75514	1.98311e-06	3.34747e-05
5330417C22Rik	0.767786	-3.23857	1.10976	-2.91827	0.00351978	0.0120644
Nlrp1c-ps	0.953909	-3.10599	1.10258	-2.81703	0.00484693	0.0155995
Oxct2a	0.923789	-3.02391	1.11037	-2.72335	0.00646241	0.0196924
1700001K23Rik	0.848712	-2.94869	1.16927	-2.52183	0.0116746	0.0318261
Kcng1	1.35612	-2.77617	0.951818	-2.91671	0.00353749	0.0121137
Gpr165	0.907664	-2.58775	1.10704	-2.33753	0.0194115	0.0480765
Fbxo48	2.35582	-2.57941	0.753151	-3.42483	0.000615182	0.00298057
1700071M16Rik	13.0355	-2.55566	0.516759	-4.94556	7.59251e-07	1.55143e-05
1700001O22Rik	258.298	-2.53669	0.490308	-5.17366	2.29552e-07	6.18374e-06
Prap1	3.75872	-2.51258	0.626585	-4.00996	6.07302e-05	0.000480183
E130008D07Rik	2.9919	-2.51003	0.733917	-3.42004	0.000626116	0.00302177
Hrh4	0.893463	-2.50945	1.09045	-2.30129	0.0213752	0.0519921
Trim9	0.888188	-2.50814	1.07349	-2.33644	0.0194683	0.0481729
Zfp366	52.2339	-2.47652	0.488595	-5.06866	4.00629e-07	9.45232e-06
Grem2	74.6733	-2.44809	0.35489	-6.89815	5.26846e-12	1.06004e-09
Rgag1	2.53124	-2.44116	0.749366	-3.25764	0.00112344	0.004837
Duox2	1.42659	-2.43897	0.98339	-2.48017	0.0131321	0.0349965
Nos1	1361.27	-2.41179	0.630318	-3.8263	0.000130083	0.000887102
4932411E22Rik	0.854532	-2.41177	1.0522	-2.29213	0.0218981	0.0531399
Epha3	11.2006	-2.3848	0.403326	-5.91282	3.36293e-09	2.14842e-07
Il1rl2	13.598	-2.34559	0.445919	-5.26013	1.43956e-07	4.26928e-06
Nptxr	2.73535	-2.34379	0.680588	-3.44377	0.000573656	0.00282855
2700086A05Rik	4.38349	-2.31108	0.532391	-4.34095	1.41865e-05	0.000153004
Gm16982	2.68841	-2.2838	0.730183	-3.12772	0.00176171	0.0069264
Nrk	3.22564	-2.26597	0.929886	-2.43682	0.0148171	0.0386958
Hist1h2af	2.578	-2.26069	0.764751	-2.95612	0.00311538	0.0108921
Tll2	1.62355	-2.24227	0.903865	-2.48076	0.0131103	0.03495
Igsf9b	3.46767	-2.20865	0.658022	-3.3565	0.000789368	0.00363388
Necab1	3.79002	-2.19518	0.615053	-3.56909	0.000358228	0.00194689
Gpr161	5.00636	-2.19442	0.554317	-3.95879	7.53309e-05	0.000571362
Nr4a3	62.1771	-2.19262	0.721393	-3.03942	0.00237031	0.008721
Col6a6	69.1493	-2.16482	0.290961	-7.44023	1.00508e-13	3.3844e-11
Hist1h1b	2.49716	-2.14816	0.709703	-3.02685	0.00247118	0.00901724
Cdkl5	8.54651	-2.12491	0.443402	-4.79228	1.64899e-06	2.87945e-05
Adamts12	45.5564	-2.08361	0.341236	-6.10607	1.02116e-09	8.57667e-08
Tex15	1.7532	-2.07921	0.804878	-2.58326	0.00978712	0.027616
Cpeb4	638.856	-2.07033	0.568837	-3.63957	0.00027309	0.00157024
Samd5	20.1827	-2.06173	0.359566	-5.73394	9.81212e-09	5.01878e-07
Hipk2	733.999	-2.01867	0.295975	-6.82041	9.07827e-12	1.63036e-09
Sstr4	2.28447	-1.99825	0.776708	-2.57272	0.0100903	0.0283289
Lgi2	21.7495	-1.99734	0.271294	-7.36228	1.80791e-13	5.84426e-11
Bmp8a	12.7732	-1.9525	0.544622	-3.58506	0.000336997	0.00185583
Asxl3	5.16665	-1.94508	0.488711	-3.98002	6.89103e-05	0.000533172
Shroom4	73.4513	-1.94391	0.691247	-2.81217	0.00492079	0.0157807
Slc26a1	3.8584	-1.93696	0.557064	-3.47709	0.00050689	0.00256668
Erbb4	2.18109	-1.93631	0.84583	-2.28924	0.0220653	0.0534937
Gm5105	187.939	-1.93046	0.305016	-6.32906	2.46658e-10	2.68917e-08
Gm5567	3.82113	-1.93044	0.593402	-3.25317	0.00114126	0.00489289
C7	219.761	-1.91902	0.279974	-6.85428	7.1674e-12	1.34705e-09
1700007J10Rik	2.73407	-1.91879	0.761857	-2.51857	0.0117833	0.0320629
Slitrk1	2.61835	-1.9133	0.706473	-2.70824	0.00676414	0.0203895
Gm9833	2.69785	-1.91163	0.655596	-2.91586	0.00354704	0.0121361
Tdo2	2.16564	-1.91088	0.754395	-2.533	0.0113091	0.0310233
Sec14l5	299.885	-1.90239	0.469508	-4.05188	5.08081e-05	0.000416436
Glis3	3.74527	-1.87546	0.57263	-3.27518	0.00105596	0.00459915
Prima1	38.6754	-1.87114	0.443475	-4.21927	2.45094e-05	0.000233163
Nt5c1a	202.742	-1.86485	0.582018	-3.20411	0.00135483	0.00560484
Col1a1	2978.87	-1.85801	0.608149	-3.0552	0.00224912	0.00835499
Eif2c2	752.171	-1.85436	0.456136	-4.06536	4.79581e-05	0.000398328
Ror1	16.2648	-1.85331	0.488743	-3.79199	0.000149446	0.000984311
Best3	304.192	-1.85274	0.502339	-3.68822	0.000225827	0.00135874
Slc38a4	2130.4	-1.82077	0.243947	-7.46379	8.40675e-14	2.95388e-11
Kcnv2	6.21331	-1.82	0.6376	-2.85446	0.00431105	0.0141698
Xylt1	36.5329	-1.81862	0.40937	-4.44249	8.89254e-06	0.000106546
Btbd8	14.8409	-1.80452	0.419193	-4.30475	1.67175e-05	0.000173319
Robo1	26.052	-1.80435	0.283812	-6.35755	2.04996e-10	2.28507e-08
Megf9	43.2722	-1.79783	0.64475	-2.78841	0.00529676	0.016734
Pax9	2.49667	-1.79054	0.720722	-2.48437	0.0129782	0.0346663
Cyyr1	124.516	-1.78824	0.487537	-3.66792	0.000244535	0.00144724
Adcy9	794.531	-1.77748	0.554173	-3.20745	0.00133918	0.0055486
Arhgap20	755.526	-1.76844	0.298669	-5.92109	3.19812e-09	2.06765e-07
Rian	122.591	-1.76749	0.373844	-4.72787	2.26885e-06	3.70418e-05
Ston1	65.4657	-1.76535	0.336839	-5.24095	1.5975e-07	4.61902e-06
Bmpr2	518.558	-1.76329	0.470718	-3.74596	0.000179708	0.00113728
Pdpr	1475.37	-1.7515	0.625504	-2.80015	0.00510792	0.016271
Prokr1	14.0466	-1.74792	0.31454	-5.55706	2.74358e-08	1.13596e-06
Nebl	4.22132	-1.7474	0.620631	-2.81552	0.00486977	0.0156575
Papln	35.6078	-1.74154	0.477938	-3.64386	0.000268576	0.0015548
Hmbox1	98.2296	-1.72946	0.363653	-4.75581	1.97654e-06	3.34172e-05
Nr5a2	6.30296	-1.7282	0.484877	-3.56419	0.000364978	0.00197692
Mgat5	8.80738	-1.7248	0.391591	-4.40461	1.05974e-05	0.000121221
Hist1h3g	2.92365	-1.71897	0.605037	-2.8411	0.00449586	0.0146594
Fcer2a	5.04504	-1.71527	0.48593	-3.52987	0.000415758	0.00218676
Spna1	3.85771	-1.71416	0.641432	-2.6724	0.0075311	0.0222858
9930111J21Rik1	10.93	-1.71146	0.337045	-5.07784	3.81745e-07	9.0807e-06
Zbed6	497.014	-1.69262	0.469998	-3.60133	0.000316589	0.00176632
Clcn5	14.6892	-1.68852	0.513008	-3.29141	0.000996874	0.00438673
Gm14827	6.4751	-1.68315	0.437026	-3.85137	0.00011746	0.000817263
Pde3a	32.3454	-1.68212	0.335527	-5.01335	5.34908e-07	1.1795e-05
Chad	162.841	-1.6772	0.557247	-3.00979	0.00261428	0.00945505
D830031N03Rik	132.371	-1.67512	0.417216	-4.01499	5.94471e-05	0.000473089
Cbl	72.5193	-1.67422	0.370652	-4.51697	6.27296e-06	8.15388e-05
Tmem200a	2.96161	-1.65759	0.671035	-2.4702	0.0135037	0.0358215
Aff2	3.23681	-1.64092	0.617079	-2.65917	0.00783333	0.0230117
Smox	6804.81	-1.63616	0.250083	-6.54248	6.0506e-11	8.81043e-09
Snph	40.2441	-1.63472	0.35806	-4.56549	4.9834e-06	6.83178e-05
Car12	3.73144	-1.6345	0.557142	-2.93372	0.00334926	0.011577
Ldhal6b	4.46657	-1.6339	0.506245	-3.22748	0.00124886	0.00524159
Ccdc48	10.5015	-1.63279	0.337854	-4.83282	1.34615e-06	2.45851e-05
Slc25a30	80.0768	-1.63179	0.358859	-4.54714	5.43788e-06	7.30004e-05
Fgd4	130.962	-1.61221	0.251421	-6.41238	1.43262e-10	1.7542e-08
Gpr135	2.7952	-1.60666	0.609067	-2.63789	0.00834225	0.0242162
Pax7	34.7841	-1.60409	0.415221	-3.86322	0.000111904	0.000786393
Rgs9bp	21.5802	-1.60406	0.329107	-4.87396	1.09381e-06	2.09469e-05
Igsf10	49.9688	-1.59778	0.356441	-4.4826	7.37376e-06	9.17602e-05
Pcdhga11	14.0851	-1.59185	0.371541	-4.28445	1.83192e-05	0.000185639
Sacs	24.8646	-1.59143	0.320621	-4.96357	6.92084e-07	1.44785e-05
Msx1as	2.51772	-1.59092	0.685014	-2.32246	0.0202082	0.0496843
Gdap10	41.6463	-1.58159	0.413989	-3.82035	0.000133261	0.000901215
Pcdhga9	5.47398	-1.57844	0.502129	-3.1435	0.00166942	0.00663471
Arl5b	158.466	-1.57835	0.356947	-4.4218	9.78822e-06	0.000113982
Atf7	133.257	-1.57582	0.368787	-4.27298	1.92878e-05	0.000192914
Fam65b	108.993	-1.57577	0.202741	-7.77232	7.70586e-15	3.45972e-12
4831426I19Rik	64.1755	-1.57552	0.27705	-5.68679	1.29448e-08	6.24556e-07
Ppp1r12b	1701.83	-1.57532	0.509603	-3.09128	0.00199297	0.00762544
Lama3	41.5736	-1.57339	0.252235	-6.23777	4.43862e-10	4.34796e-08
Zfp750	23.8266	-1.57142	0.228147	-6.88776	5.66796e-12	1.11721e-09
Itga11	74.8945	-1.56496	0.198804	-7.87187	3.49386e-15	1.71125e-12
Wasf3	8.08289	-1.5627	0.414308	-3.77183	0.000162054	0.00104958
Zfp652	665.833	-1.56173	0.297241	-5.25408	1.48763e-07	4.39572e-06
Lcor	59.7346	-1.56126	0.31204	-5.0034	5.63274e-07	1.23196e-05
Col3a1	5320.87	-1.55856	0.617278	-2.52489	0.0115735	0.0316193
6330545A04Rik	2.62413	-1.55852	0.644958	-2.41647	0.0156717	0.0405543
Dagla	237.164	-1.55593	0.189074	-8.22922	1.88444e-16	1.38446e-13
1700020I14Rik	2537.43	-1.55509	0.278534	-5.58312	2.36246e-08	1.00929e-06
Btaf1	622.93	-1.55249	0.161597	-9.60716	7.45753e-22	2.00893e-18
Fbn1	865.918	-1.54364	0.271155	-5.69283	1.24951e-08	6.11995e-07
Slc36a4	19.4743	-1.54161	0.458733	-3.36058	0.000777782	0.0035918
Sik2	170.072	-1.53686	0.512747	-2.99731	0.00272371	0.0097786
Otog	67.3216	-1.53312	0.359088	-4.26949	1.95917e-05	0.000195135
Odz4	12.9279	-1.52085	0.343667	-4.42535	9.62856e-06	0.00011288
Slfn3	12.847	-1.5193	0.369245	-4.11463	3.87808e-05	0.000334301
Zfp369	32.6467	-1.51915	0.430195	-3.53131	0.000413508	0.00217776
Gpr17	37.8675	-1.51699	0.390571	-3.88403	0.000102739	0.000733146
Heg1	247.855	-1.51455	0.371847	-4.07303	4.64052e-05	0.000386822
Gm221	5.67696	-1.51449	0.458258	-3.30489	0.000950135	0.00421781
Irs2	298.322	-1.5143	0.382559	-3.95834	7.54733e-05	0.000571417
Pcdhgb6	32.9063	-1.51308	0.393026	-3.84983	0.000118202	0.000822075
Hes5	3.33664	-1.50854	0.625285	-2.41256	0.0158407	0.0409036
Chst11	81.4253	-1.50646	0.305892	-4.92482	8.444e-07	1.68287e-05
Nlgn3	3.16346	-1.50623	0.588732	-2.55843	0.0105145	0.0292607
Hmga2-ps1	209.255	-1.50483	0.530267	-2.83787	0.00454158	0.0147727
Map3k13	30.8012	-1.50188	0.417794	-3.59478	0.000324671	0.00180208
Prox1	8.5076	-1.49745	0.395203	-3.78906	0.00015122	0.000992755
Ccdc8	16.4983	-1.49547	0.26166	-5.71534	1.09487e-08	5.51289e-07
Hspg2	4547.37	-1.49165	0.241427	-6.17848	6.47205e-10	5.85019e-08
Hgf	3.43927	-1.48779	0.579189	-2.56875	0.0102066	0.0285661
Ptpn4	246.699	-1.48622	0.30908	-4.80854	1.52036e-06	2.71095e-05
Itga2	3.8567	-1.48537	0.541313	-2.74402	0.00606925	0.0187403
5330437I02Rik	56.3777	-1.48126	0.324866	-4.5596	5.12517e-06	6.97879e-05
Gipc3	9.73208	-1.47636	0.563118	-2.62176	0.00874765	0.0251624
Rtn4r	3.26017	-1.47615	0.533934	-2.76466	0.00569818	0.0178039
Npas2	20.0442	-1.47565	0.395995	-3.72643	0.000194209	0.00120221
Sema5a	81.8288	-1.47413	0.186772	-7.89266	2.95807e-15	1.4941e-12
Pcdhgb1	5.60867	-1.47146	0.447703	-3.28669	0.00101374	0.00444883
Npnt	148.309	-1.46962	0.349969	-4.1993	2.67743e-05	0.000250435
Abca9	245.493	-1.46586	0.252296	-5.81008	6.24415e-09	3.52882e-07
Odf3l2	150.241	-1.46156	0.599115	-2.43953	0.0147062	0.0384561
Mme	66.5917	-1.46113	0.206161	-7.08731	1.36744e-12	3.45343e-10
Asb18	208.943	-1.46004	0.393258	-3.71268	0.000205074	0.00125316
Ralgps1	33.0709	-1.45454	0.374915	-3.87966	0.000104603	0.000742839
Pcsk6	282.87	-1.45049	0.147349	-9.8439	7.28323e-23	2.35438e-19
Wdfy2	64.6209	-1.44961	0.362952	-3.99393	6.49864e-05	0.00050841
Tiam1	153.255	-1.44876	0.303615	-4.77168	1.82691e-06	3.13465e-05
Fam38a	384.069	-1.44752	0.360987	-4.00991	6.07422e-05	0.000480183
Chrna2	12.8297	-1.44647	0.534792	-2.70473	0.00683598	0.020541
4931431C16Rik	2.98722	-1.44469	0.616864	-2.34199	0.0191812	0.047623
Lass6	12.1347	-1.44101	0.452632	-3.18362	0.00145446	0.00594248
Btbd7	256.33	-1.44059	0.340331	-4.23292	2.3068e-05	0.000221669
Myo7b	5.86641	-1.43847	0.413296	-3.48049	0.000500505	0.00253913
Cacna2d4	314.072	-1.43511	0.219944	-6.5249	6.80467e-11	9.73309e-09
Ptch1	131.973	-1.43155	0.530505	-2.69846	0.00696617	0.0208546
Col6a3	1120.18	-1.43106	0.306363	-4.67112	2.99555e-06	4.59365e-05
Col5a1	733.853	-1.42854	0.311162	-4.59099	4.41149e-06	6.24863e-05
Coch	16.427	-1.42462	0.282334	-5.04587	4.51452e-07	1.02917e-05
Ly6g6e	11.9183	-1.42281	0.401693	-3.54203	0.00039706	0.00210969
Gpr133	109.86	-1.42186	0.21661	-6.56414	5.23355e-11	7.8324e-09
Abhd2	51.4877	-1.41488	0.477908	-2.96057	0.00307075	0.0107897
Rassf8	189.17	-1.41437	0.383252	-3.69043	0.000223873	0.00134834
Ttll4	170.278	-1.41399	0.314945	-4.48964	7.13439e-06	8.98078e-05
Fam167a	13.3407	-1.40983	0.379335	-3.71657	0.000201943	0.00123918
Pkhd1l1	8.08625	-1.4084	0.390479	-3.60685	0.000309939	0.00173761
Ebf2	65.7615	-1.407	0.217211	-6.47759	9.31987e-11	1.21794e-08
Zdhhc23	26.2364	-1.40668	0.508004	-2.76904	0.00562222	0.017604
Prdm10	39.4533	-1.4049	0.431	-3.25963	0.00111558	0.0048083
Leprel1	25.0285	-1.40317	0.383353	-3.66025	0.000251965	0.00148199
Vps13c	910.57	-1.40004	0.452007	-3.09739	0.00195235	0.00751569
Lyst	90.9591	-1.39634	0.37088	-3.76494	0.000166589	0.00106976
Gbgt1	5.64403	-1.39355	0.467125	-2.98326	0.002852	0.0101438
Neto2	170.913	-1.388	0.231191	-6.00372	1.9285e-09	1.41042e-07
Spred2	116.134	-1.38713	0.394967	-3.51202	0.000444708	0.00230971
Adamts4	12.3113	-1.38711	0.45588	-3.04272	0.00234454	0.00864387
Mrgprb1	11.3645	-1.38567	0.396449	-3.49521	0.000473689	0.00242978
Fat4	177.202	-1.38248	0.213386	-6.47879	9.24604e-11	1.21794e-08
Gm17296	202.188	-1.38058	0.371948	-3.71175	0.00020583	0.00125588
AI506816	26.5027	-1.3803	0.45175	-3.05544	0.0022473	0.00835398
Pggt1b	188.562	-1.37962	0.307502	-4.48654	7.23884e-06	9.07691e-05
AF357359	3.66772	-1.37906	0.531246	-2.5959	0.00943435	0.0267677
Tbck	117.669	-1.37859	0.386303	-3.56868	0.000358791	0.00194864
Ankrd52	1497.86	-1.37818	0.366004	-3.76546	0.00016624	0.00106879
Slc6a2	13.1931	-1.37206	0.330763	-4.14818	3.35135e-05	0.000297953
Sned1	73.0704	-1.37068	0.382639	-3.58218	0.000340745	0.00187074
Fhl5	15.0725	-1.36767	0.372918	-3.66749	0.000244946	0.00144862
Arntl	379.464	-1.36669	0.290684	-4.70165	2.58071e-06	4.07742e-05
Arsi	24.8882	-1.36605	0.292778	-4.66583	3.07377e-06	4.68251e-05
Col4a4	34.0225	-1.36543	0.19909	-6.85839	6.96417e-12	1.32426e-09
Pi15	22.6877	-1.36445	0.390142	-3.49732	0.000469961	0.00241526
Auts2	359.604	-1.36441	0.240614	-5.67051	1.42369e-08	6.63145e-07
Fam46c	17.1226	-1.36432	0.331664	-4.11357	3.89591e-05	0.000335443
Bmp5	134.27	-1.36392	0.24676	-5.52734	3.25128e-08	1.30723e-06
Trpm3	15.5988	-1.36327	0.28395	-4.80108	1.57809e-06	2.78762e-05
Ssh1	82.3028	-1.35834	0.275555	-4.92948	8.24508e-07	1.64728e-05
4833403I15Rik	44.5465	-1.35216	0.346982	-3.89691	9.74273e-05	0.000702999
Eif4ebp2	1615.26	-1.34905	0.450443	-2.99494	0.00274497	0.00983963
A430110N23Rik	182.172	-1.34531	0.318103	-4.22916	2.34569e-05	0.000224943
Trip11	473.914	-1.34488	0.249178	-5.39725	6.76719e-08	2.32225e-06
Dbndd1	40.4969	-1.34414	0.414787	-3.24057	0.00119292	0.00505537
Uhmk1	96.1891	-1.34332	0.38053	-3.53013	0.000415359	0.00218536
Gan	25.7818	-1.34314	0.301805	-4.45037	8.57211e-06	0.000103784
Cit	15.4051	-1.34264	0.340481	-3.94336	8.0349e-05	0.000602357
Nts	23.8564	-1.34256	0.524901	-2.55774	0.0105355	0.0292989
Nphp4	6.61196	-1.34238	0.421508	-3.18471	0.00144899	0.00592464
Usp9x	2205.53	-1.3405	0.483694	-2.77137	0.00558203	0.0174985
Fgf6	35	-1.33294	0.297337	-4.48292	7.36275e-06	9.17534e-05
Zyg11a	15.4797	-1.3292	0.268334	-4.95354	7.28759e-07	1.50626e-05
Adra1a	27.5035	-1.3291	0.26139	-5.08475	3.68109e-07	8.89349e-06
Col6a2	1077.79	-1.32839	0.299064	-4.44183	8.9196e-06	0.000106791
Kcng4	1341.26	-1.32708	0.14666	-9.04869	1.44698e-19	2.33876e-16
Lmbrd2	162.781	-1.32647	0.56709	-2.33909	0.0193309	0.047899
2210009G21Rik	40.1819	-1.32486	0.385455	-3.43712	0.00058794	0.00288228
Ret	85.8934	-1.32138	0.193505	-6.82863	8.57309e-12	1.57462e-09
Zhx3	181.557	-1.31497	0.274126	-4.79696	1.61092e-06	2.82401e-05
4930578C19Rik	39.99	-1.31164	0.349647	-3.75134	0.000175892	0.00111839
Has2	13.1689	-1.31145	0.375823	-3.48955	0.000483827	0.0024708
Vps13d	1607.14	-1.31143	0.329329	-3.98211	6.83057e-05	0.000530017
Evi5l	142.293	-1.3111	0.388328	-3.37627	0.000734759	0.00342937
Itpkb	555.962	-1.3074	0.444999	-2.938	0.00330341	0.0114479
Col15a1	636.36	-1.3074	0.348707	-3.74928	0.000177346	0.00112586
Mmp28	35.9061	-1.30649	0.283793	-4.60367	4.15118e-06	5.97467e-05
Tmem229a	7.77773	-1.30432	0.356787	-3.65575	0.000256434	0.00150117
Fn1	1510.78	-1.29812	0.361838	-3.58757	0.00033378	0.00184189
Gatad2b	237.663	-1.29664	0.347273	-3.73377	0.000188635	0.00117855
Adamts3	14.3825	-1.29654	0.275056	-4.71374	2.43209e-06	3.89592e-05
Mbd5	313.447	-1.29544	0.281489	-4.60209	4.18282e-06	6.01485e-05
Dennd4c	704.389	-1.29161	0.296994	-4.34896	1.36787e-05	0.000148482
Cacna1c	59.3717	-1.29007	0.27152	-4.75128	2.02136e-06	3.37513e-05
Slc24a5	5.60108	-1.28932	0.481702	-2.67659	0.00743766	0.0220461
Has3	63.0692	-1.28824	0.290956	-4.42762	9.52783e-06	0.000111991
Col4a2	2375.93	-1.28698	0.251133	-5.1247	2.9801e-07	7.52616e-06
Zfp109	32.7784	-1.28543	0.445985	-2.88223	0.00394873	0.0132304
Cyb5d1	98.0184	-1.28507	0.521278	-2.46522	0.0136928	0.0362577
Fbxl18	91.2939	-1.28307	0.375995	-3.41247	0.000643773	0.00308305
Dnmbp	310.589	-1.28083	0.458817	-2.79159	0.00524492	0.0165995
Dyrk2	686.345	-1.28071	0.225547	-5.67823	1.36096e-08	6.48887e-07
Rel	45.2245	-1.28042	0.238695	-5.36426	8.12808e-08	2.70874e-06
Kdr	1209.98	-1.27986	0.198934	-6.43357	1.24638e-10	1.54964e-08
Slc25a36	374.694	-1.27844	0.224945	-5.68336	1.32076e-08	6.33454e-07
Fgf14	8.61843	-1.27662	0.423266	-3.01612	0.00256031	0.00929729
Col6a1	1248.69	-1.27638	0.25953	-4.91804	8.74163e-07	1.73576e-05
Lamc3	20.4007	-1.27495	0.26299	-4.8479	1.24774e-06	2.32545e-05
Ccdc88c	815.247	-1.2748	0.30771	-4.14287	3.42987e-05	0.000303931
Pkd1	785.204	-1.27334	0.325182	-3.91579	9.01089e-05	0.000658422
Pcdh12	136.117	-1.27333	0.262843	-4.84447	1.26949e-06	2.34768e-05
Mrs2	420.633	-1.27298	0.250059	-5.09071	3.56718e-07	8.65709e-06
Mob1a	103.548	-1.27292	0.398658	-3.19302	0.00140792	0.00578835
Fat3	77.3665	-1.269	0.348377	-3.64261	0.000269883	0.00155836
Gm5113	163.66	-1.26838	0.356525	-3.55763	0.000374221	0.0020155
Ccdc85c	576.984	-1.26719	0.443297	-2.85856	0.00425563	0.0140289
Camk4	4.59459	-1.26455	0.512668	-2.4666	0.0136401	0.0361299
Gpld1	537.788	-1.25942	0.332524	-3.78746	0.000152195	0.000998752
Hr	1872.1	-1.25754	0.212749	-5.91091	3.40229e-09	2.15652e-07
Gm10549	6.8218	-1.25495	0.406922	-3.08401	0.00204233	0.00777624
Creb3l2	195.435	-1.25401	0.34493	-3.63555	0.000277388	0.0015903
Kif13b	172.63	-1.25261	0.52267	-2.39656	0.01655	0.0422939
Fam5b	8.45643	-1.25155	0.372535	-3.35955	0.000780684	0.00360211
Uprt	38.1916	-1.24972	0.500468	-2.4971	0.0125215	0.0337028
Usp34	1387.07	-1.24969	0.282495	-4.42375	9.70001e-06	0.000113363
Ace	881.168	-1.24814	0.18093	-6.89848	5.25615e-12	1.06004e-09
Pik3ap1	13.8837	-1.24777	0.39714	-3.14188	0.00167864	0.00666468
Flrt1	84.2252	-1.24248	0.280436	-4.43052	9.4004e-06	0.000110944
Pdzd2	629.818	-1.2404	0.222052	-5.5861	2.3222e-08	1.0009e-06
Foxo3	195.97	-1.24028	0.521865	-2.37664	0.0174711	0.044153
Fbxo40	3225.04	-1.2397	0.49658	-2.49648	0.0125432	0.0337557
Raver2	207.847	-1.23875	0.20678	-5.99067	2.0898e-09	1.49458e-07
E330009J07Rik	4.70177	-1.23701	0.462144	-2.67667	0.00743577	0.0220461
Gm4861	36.8704	-1.23625	0.479038	-2.5807	0.00986011	0.0277791
9130019P16Rik	15.4049	-1.2352	0.417424	-2.95909	0.00308547	0.0108226
Col4a1	3014.39	-1.23453	0.257131	-4.80119	1.57729e-06	2.78762e-05
Smad3	2807.21	-1.23391	0.21958	-5.61941	1.91615e-08	8.55544e-07
Mmp9	32.3666	-1.23324	0.414391	-2.97603	0.00292007	0.0103434
Pcdhgc3	145.255	-1.23271	0.489972	-2.51587	0.0118739	0.0322525
Vcan	105.173	-1.2315	0.285943	-4.3068	1.65634e-05	0.000171942
2310016D03Rik	123.292	-1.23043	0.283285	-4.34344	1.4027e-05	0.00015155
C1galt1	212.555	-1.22958	0.346044	-3.55324	0.000380518	0.00204126
Mrgprh	64.6876	-1.22849	0.209538	-5.86286	4.54954e-09	2.72349e-07
Angptl1	98.0525	-1.22796	0.265482	-4.62538	3.73911e-06	5.4754e-05
Edn3	13.0762	-1.22742	0.339991	-3.61016	0.000306007	0.00171915
Col1a2	4344.83	-1.22587	0.518418	-2.36464	0.0180476	0.0453448
Trim14	11.9267	-1.22585	0.334228	-3.66772	0.000244725	0.00144784
Rgs5	2288.57	-1.2255	0.350885	-3.4926	0.000478349	0.00244824
Gna12	411.299	-1.22157	0.269304	-4.53601	5.73277e-06	7.59499e-05
Shc3	4.141	-1.21931	0.516391	-2.36121	0.0182155	0.0456672
Ncor2	2914.25	-1.21925	0.193912	-6.28766	3.22297e-10	3.30453e-08
Nhlrc3	32.5987	-1.21898	0.314962	-3.87026	0.000108721	0.000767695
B230119M05Rik	6.88177	-1.21629	0.517419	-2.35069	0.0187388	0.0467255
Itga1	263.541	-1.21499	0.224315	-5.41647	6.07882e-08	2.16593e-06
Frem1	16.4484	-1.21371	0.278056	-4.36498	1.27137e-05	0.00013979
Ttll7	4454.66	-1.21265	0.321857	-3.76766	0.000164784	0.00106196
Sgcd	376.233	-1.2118	0.245199	-4.94213	7.72734e-07	1.57232e-05
Pdzd7	198.661	-1.21177	0.186614	-6.49346	8.38851e-11	1.13936e-08
Pde4a	1513	-1.21079	0.143883	-8.41511	3.92543e-17	3.3393e-14
Fndc1	557.481	-1.20927	0.244021	-4.9556	7.21058e-07	1.498e-05
Nbeal1	405.723	-1.20831	0.305947	-3.94942	7.834e-05	0.000590032
Phc1	478.586	-1.20802	0.206713	-5.84394	5.0981e-09	3.01103e-07
Inpp5j	105.446	-1.20655	0.239074	-5.04675	4.4939e-07	1.02592e-05
Ern1	176.6	-1.20629	0.516113	-2.33726	0.0194256	0.0480894
Plxna1	530.955	-1.20539	0.254213	-4.74163	2.12003e-06	3.4963e-05
Nid1	1226.38	-1.2043	0.217151	-5.54593	2.92402e-08	1.19648e-06
Strn	121.626	-1.2008	0.388259	-3.09279	0.00198286	0.00760118
Arhgef11	515.003	-1.20001	0.365531	-3.28293	0.00102736	0.00449638
C130021I20Rik	5.42298	-1.19999	0.476711	-2.51723	0.0118282	0.0321526
A630055G03Rik	47.1161	-1.19878	0.241523	-4.96341	6.92654e-07	1.44785e-05
Tead4	184.721	-1.19811	0.395411	-3.03004	0.00244522	0.00893762
Adamtsl3	85.3775	-1.19694	0.18722	-6.39324	1.62411e-10	1.87504e-08
Rcor1	119.339	-1.19362	0.3594	-3.32114	0.000896517	0.00402064
2410066E13Rik	58.4265	-1.193	0.301485	-3.95708	7.58726e-05	0.000573855
C130083M11Rik	62.4509	-1.19275	0.368429	-3.2374	0.00120624	0.0050971
Dag1	3558.2	-1.1922	0.419095	-2.8447	0.00444537	0.014527
Gm996	4.60483	-1.18911	0.486591	-2.44375	0.0145355	0.0380774
Mogat2	4.61126	-1.18904	0.480562	-2.47426	0.0133513	0.035522
Kcnq4	365.642	-1.187	0.468747	-2.53227	0.0113326	0.0310666
Fat1	101.939	-1.18672	0.234708	-5.05614	4.27834e-07	9.907e-06
Vwa3a	24.1227	-1.18408	0.270252	-4.3814	1.17921e-05	0.000132227
Siglec1	24.9863	-1.18192	0.300038	-3.93924	8.17392e-05	0.000610432
Zfp551	18.2904	-1.18149	0.405853	-2.91114	0.00360116	0.0122719
Gys2	13.5955	-1.176	0.406585	-2.89238	0.0038233	0.0128849
Ep300	1386.81	-1.17563	0.192796	-6.09778	1.07551e-09	8.81816e-08
Gm2011	4.34084	-1.17551	0.487732	-2.41015	0.015946	0.0411259
Zfp609	587.663	-1.17495	0.205981	-5.70415	1.16924e-08	5.8135e-07
Pds5a	603.687	-1.1729	0.319177	-3.67477	0.000238063	0.00141881
Palld	699.724	-1.1726	0.281029	-4.17252	3.01248e-05	0.000273543
Npc1	1840.59	-1.17124	0.27938	-4.1923	2.76146e-05	0.000255696
Arsj	5.72047	-1.17122	0.453525	-2.58247	0.00980957	0.0276657
Snx29	67.7224	-1.16738	0.297218	-3.9277	8.57633e-05	0.000633543
5730405O15Rik	8.78413	-1.16579	0.403934	-2.88609	0.00390066	0.0130992
Zbtb38	641.583	-1.16479	0.244149	-4.7708	1.83496e-06	3.14512e-05
Dnmt3a	1576.32	-1.16314	0.13318	-8.7336	2.46697e-18	2.65824e-15
Cmklr1	102.877	-1.16301	0.249576	-4.65994	3.16303e-06	4.79588e-05
Etohi1	305.334	-1.16268	0.31003	-3.75022	0.000176683	0.00112209
Ndst1	1289.63	-1.16164	0.308989	-3.75948	0.000170269	0.00108992
Ar	221.48	-1.16146	0.251109	-4.62534	3.73992e-06	5.4754e-05
Fgf2	16.0344	-1.1604	0.504065	-2.30208	0.0213305	0.0519146
Creb5	16.5983	-1.15945	0.289231	-4.00874	6.10444e-05	0.000481768
Bahcc1	218.749	-1.1592	0.233408	-4.96642	6.82013e-07	1.43219e-05
Loxl2	209.248	-1.15524	0.265263	-4.35509	1.33012e-05	0.000145164
Hils1	22.8777	-1.15516	0.404822	-2.85349	0.00432418	0.0141981
Cacng7	178.775	-1.15488	0.315115	-3.66495	0.000247385	0.00146037
Ptar1	42.1144	-1.15454	0.202989	-5.68768	1.28776e-08	6.24556e-07
Zfp526	93.6015	-1.15377	0.381846	-3.02155	0.00251481	0.00915675
9830001H06Rik	229.961	-1.15326	0.195879	-5.8876	3.91842e-09	2.41731e-07
Cdk19	942.836	-1.15111	0.178671	-6.44262	1.17426e-10	1.48278e-08
Abca2	828.956	-1.15103	0.246983	-4.66036	3.15664e-06	4.79068e-05
1700020D05Rik	6.02864	-1.14973	0.398871	-2.88246	0.00394584	0.0132234
Mast4	1131.91	-1.148	0.248028	-4.6285	3.68319e-06	5.41686e-05
Svep1	210.983	-1.14658	0.195552	-5.86331	4.53729e-09	2.72349e-07
Phf16	7.52716	-1.14423	0.433892	-2.63713	0.00836109	0.0242652
Agbl1	337.072	-1.14212	0.488949	-2.33587	0.0194981	0.0482321
Ephb2	11.3474	-1.14144	0.386034	-2.95685	0.00310803	0.0108805
Spon2	25.6932	-1.14087	0.451806	-2.52513	0.0115654	0.0316084
Plekhg1	111.279	-1.14073	0.155206	-7.34979	1.98514e-13	6.29133e-11
Pogk	380.058	-1.1407	0.165259	-6.90251	5.10906e-12	1.05869e-09
Dvl3	483.041	-1.13984	0.48508	-2.3498	0.0187837	0.0467941
Zfp398	71.5437	-1.13942	0.278855	-4.08607	4.38733e-05	0.000368759
Myh10	478.417	-1.13857	0.238325	-4.77737	1.77607e-06	3.05934e-05
Fam129a	215.402	-1.13724	0.25503	-4.45923	8.22557e-06	0.000100374
Mlxip	2122.4	-1.13716	0.198397	-5.73173	9.94143e-09	5.06887e-07
Grlf1	1090.81	-1.13656	0.241906	-4.69836	2.62262e-06	4.13151e-05
Atp2b4	343.412	-1.1343	0.13141	-8.63175	6.04185e-18	5.74437e-15
Iqsec1	1877.37	-1.13401	0.195493	-5.80075	6.60184e-09	3.64182e-07
C3	1445.05	-1.13368	0.234629	-4.83181	1.35295e-06	2.46447e-05
Zmiz2	1595.39	-1.13367	0.206306	-5.49508	3.90544e-08	1.51013e-06
Crybg3	815.963	-1.13134	0.234569	-4.82308	1.4136e-06	2.54433e-05
1110002L01Rik	34.4087	-1.13104	0.304636	-3.71275	0.00020502	0.00125316
Spen	746.596	-1.12633	0.194728	-5.78412	7.28908e-09	3.94133e-07
Itga4	409.809	-1.12497	0.294795	-3.81612	0.000135566	0.000912604
Itih5	537.402	-1.12446	0.210794	-5.3344	9.58627e-08	3.08038e-06
Dpysl5	17.1701	-1.12242	0.307247	-3.65315	0.000259041	0.00150951
Sufu	79.6063	-1.12217	0.355122	-3.15996	0.0015779	0.00633946
Mef2a	1675.86	-1.12155	0.481531	-2.32914	0.0198516	0.049009
Slc6a4	7.042	-1.12052	0.37575	-2.98208	0.00286296	0.0101746
Olfml2a	54.0982	-1.1205	0.46139	-2.42853	0.0151601	0.0393943
Tspan18	48.9182	-1.12006	0.23822	-4.70181	2.57871e-06	4.07742e-05
Psd3	728.398	-1.11873	0.181571	-6.16136	7.21225e-10	6.33541e-08
Foxn3	698.277	-1.11549	0.190568	-5.85349	4.81377e-09	2.86048e-07
Zfp382	9.28421	-1.11518	0.333242	-3.34647	0.000818477	0.00374125
Dst	13399.6	-1.11453	0.227435	-4.90042	9.56323e-07	1.87131e-05
Slit3	226.261	-1.11412	0.176019	-6.32957	2.45853e-10	2.68917e-08
Dopey2	704.723	-1.11347	0.170706	-6.52275	6.90303e-11	9.78717e-09
Fhdc1	4.13138	-1.11309	0.487911	-2.28133	0.0225288	0.0543806
Lamc1	1885.19	-1.10896	0.180222	-6.1533	7.58854e-10	6.56728e-08
Scn4a	12023.4	-1.10881	0.301477	-3.67791	0.000235149	0.00140403
Itga6	451.632	-1.10859	0.32068	-3.45701	0.000546206	0.00272311
Ptafr	13.9743	-1.1053	0.327266	-3.37737	0.000731817	0.00342157
Tlr5	34.0767	-1.10499	0.444623	-2.48523	0.0129468	0.0346168
4933439F18Rik	2141.51	-1.09934	0.182368	-6.02812	1.6588e-09	1.25874e-07
Xrn1	209.407	-1.09838	0.326469	-3.36443	0.000767029	0.00355636
Zbtb16	1360.02	-1.09581	0.269754	-4.06228	4.85966e-05	0.000402803
Scara5	339.487	-1.09383	0.175503	-6.23254	4.58935e-10	4.44178e-08
Gm6307	510.147	-1.0924	0.135826	-8.04265	8.79183e-16	5.26305e-13
Tubgcp6	266.308	-1.09209	0.346926	-3.14791	0.00164441	0.00656262
Prelp	701.476	-1.09147	0.207384	-5.26301	1.41712e-07	4.21047e-06
Il1r1	235.833	-1.09104	0.241451	-4.51868	6.22249e-06	8.11082e-05
8030462N17Rik	472.558	-1.0901	0.325786	-3.34607	0.000819651	0.00374555
Pfkfb3	7228.88	-1.08995	0.431665	-2.52499	0.0115703	0.0316163
Fam78b	40.945	-1.08989	0.22458	-4.85299	1.21615e-06	2.27507e-05
Col5a3	701.911	-1.08961	0.222265	-4.90231	9.47163e-07	1.86015e-05
Mfap3l	184.068	-1.08915	0.1242	-8.7693	1.79783e-18	2.26987e-15
St3gal1	450.776	-1.08693	0.18733	-5.8022	6.54491e-09	3.63491e-07
Antxr1	227.747	-1.08588	0.254692	-4.26349	2.01257e-05	0.000199077
Gdf11	98.3807	-1.08571	0.314831	-3.44854	0.000563626	0.00279017
Atp2b3	262.052	-1.08498	0.289276	-3.75068	0.000176357	0.0011209
BC068281	75.7885	-1.08403	0.272641	-3.97604	7.00727e-05	0.000540355
Med12	673.773	-1.08383	0.314275	-3.44866	0.000563376	0.00278978
Dpp4	84.2908	-1.08299	0.245302	-4.41492	1.01047e-05	0.000116781
Col5a2	665.728	-1.08155	0.371568	-2.91078	0.00360524	0.0122766
Col4a3	48.9591	-1.08141	0.211554	-5.11175	3.19193e-07	7.96159e-06
Usp24	3982.8	-1.07963	0.209847	-5.14483	2.67766e-07	6.94689e-06
4930579G18Rik	33.2294	-1.07937	0.349828	-3.08543	0.00203255	0.00774997
Egfr	163.763	-1.07931	0.172829	-6.24498	4.23865e-10	4.17739e-08
P2ry13	8.23976	-1.07923	0.461175	-2.34018	0.0192743	0.0477882
Naalad2	98.8646	-1.07916	0.186554	-5.78467	7.26545e-09	3.94133e-07
Lrp5	779.77	-1.07659	0.242603	-4.43767	9.09384e-06	0.000108315
Gm15800	692.518	-1.07636	0.22344	-4.81722	1.45573e-06	2.61143e-05
P2ry1	232.993	-1.07609	0.149952	-7.1762	7.16747e-13	1.99738e-10
Tecpr2	490.133	-1.07503	0.179263	-5.99692	2.011e-09	1.46414e-07
Arhgap5	1053.63	-1.07432	0.234582	-4.57971	4.65615e-06	6.53192e-05
Gm2176	14.7173	-1.07377	0.408311	-2.6298	0.00854363	0.0247164
Clec3a	7.45264	-1.07287	0.436453	-2.45815	0.0139655	0.0368831
Nos1ap	13.8907	-1.07219	0.422495	-2.53777	0.0111562	0.0306976
Lnpep	360.773	-1.07086	0.347874	-3.0783	0.00208184	0.00788265
Cacna1g	65.7111	-1.07049	0.192238	-5.5686	2.56798e-08	1.07669e-06
Pcnx	2914.18	-1.06933	0.187481	-5.70367	1.17256e-08	5.8135e-07
Mmp15	580.017	-1.06891	0.165381	-6.46333	1.02427e-10	1.31391e-08
Zbtb37	20.7039	-1.06873	0.346692	-3.08265	0.00205166	0.00780443
Spns2	1846.89	-1.0685	0.249297	-4.28607	1.81859e-05	0.000184742
Mtr	404.019	-1.06683	0.248778	-4.28828	1.80063e-05	0.000183387
Klhl3	15.253	-1.06587	0.390419	-2.73008	0.00633196	0.0193832
Tubb4a	19.9623	-1.0651	0.292023	-3.6473	0.000265014	0.00153638
Lhx6	42.1786	-1.06503	0.231875	-4.59311	4.36691e-06	6.19154e-05
Bicc1	118.303	-1.06425	0.151051	-7.04567	1.84576e-12	4.27928e-10
Hivep1	550.292	-1.06291	0.204905	-5.18734	2.13323e-07	5.85611e-06
Daam2	159.66	-1.06102	0.183186	-5.79205	6.95336e-09	3.80974e-07
Fam124b	8.96766	-1.05997	0.418281	-2.53412	0.0112731	0.0309559
Ttbk1	6.94393	-1.05921	0.387739	-2.73176	0.00629976	0.0192956
Miat	28.0997	-1.05823	0.430233	-2.45968	0.0139062	0.0367625
Bcl9	77.6658	-1.05746	0.290237	-3.64342	0.000269038	0.00155623
B3gnt9-ps	39.1429	-1.05675	0.221127	-4.77894	1.76224e-06	3.04631e-05
Wdfy3	974.803	-1.05659	0.221505	-4.77005	1.84176e-06	3.15343e-05
Dchs1	140.429	-1.05633	0.280513	-3.76573	0.000166066	0.00106809
Nup98	322.309	-1.05461	0.307551	-3.42907	0.000605661	0.00294504
Impad1	1887.02	-1.05384	0.262401	-4.01613	5.91615e-05	0.000471513
Megf6	22.8551	-1.05374	0.228867	-4.60414	4.14176e-06	5.96642e-05
1110018J18Rik	289.278	-1.05356	0.256793	-4.10278	4.08211e-05	0.0003491
Zfp180	444.836	-1.05356	0.166492	-6.32802	2.48333e-10	2.68917e-08
Lynx1	3510.85	-1.05245	0.183722	-5.72849	1.01331e-08	5.13423e-07
Gck	110.843	-1.04843	0.232405	-4.51121	6.44587e-06	8.30156e-05
Npas1	6.65731	-1.04823	0.418078	-2.50725	0.0121674	0.0329168
Akap12	267.779	-1.04817	0.158014	-6.63337	3.28101e-11	5.09913e-09
Adamts2	206.715	-1.0447	0.22878	-4.56642	4.96122e-06	6.81872e-05
Fads2	34.4885	-1.04452	0.257185	-4.06134	4.87918e-05	0.000404007
Mkl1	861.325	-1.04338	0.196601	-5.30708	1.11398e-07	3.4759e-06
Wnt5a	91.3041	-1.04301	0.218786	-4.76725	1.86756e-06	3.1841e-05
Ppl	123.826	-1.04252	0.246739	-4.22518	2.38745e-05	0.000228199
Plce1	90.0739	-1.04181	0.176669	-5.89696	3.70264e-09	2.30176e-07
Wnt10b	10.1243	-1.04066	0.388275	-2.68022	0.00735748	0.0218681
Wnk2	2847.14	-1.04024	0.252558	-4.11883	3.80797e-05	0.000329488
Ntn4	130.671	-1.03991	0.237193	-4.38425	1.16386e-05	0.000130817
Tecta	19.2518	-1.03977	0.310933	-3.34403	0.000825696	0.00376998
Kif3c	1402.63	-1.0383	0.196311	-5.28906	1.22946e-07	3.75768e-06
Prrt1	4.70137	-1.03753	0.452368	-2.29356	0.0218157	0.0529599
Sntb1	28.565	-1.03604	0.428951	-2.41529	0.0157226	0.0406545
Tnrc18	1052.61	-1.03568	0.228152	-4.53944	5.64036e-06	7.49097e-05
Grm1	28.2399	-1.03563	0.295425	-3.50556	0.000455653	0.00235596
Scd2	531.273	-1.03416	0.182567	-5.66458	1.47388e-08	6.82586e-07
Huwe1	4967.77	-1.03379	0.257182	-4.01968	5.82776e-05	0.000465616
Fam48a	146.524	-1.03323	0.3547	-2.91297	0.00358006	0.0122232
Rnf24	42.4642	-1.03275	0.378533	-2.72831	0.00636605	0.0194691
Ccbp2	18.0947	-1.03251	0.285869	-3.61183	0.000304046	0.0017117
Klhl28	114.739	-1.03248	0.329891	-3.12976	0.00174951	0.00688515
Btnl9	50.9807	-1.03243	0.304098	-3.39506	0.000686134	0.00324648
Map3k3	621.789	-1.03221	0.254968	-4.0484	5.15695e-05	0.000422248
Zdhhc5	2639.67	-1.03109	0.203054	-5.07789	3.81647e-07	9.0807e-06
Notch3	768.81	-1.03029	0.214654	-4.79976	1.58857e-06	2.80001e-05
Man1a	235.641	-1.03017	0.175202	-5.87987	4.10577e-09	2.50421e-07
Spnb2	3909.99	-1.0297	0.170477	-6.04014	1.53984e-09	1.19519e-07
D630003M21Rik	46.8246	-1.02863	0.189913	-5.41632	6.08385e-08	2.16593e-06
Zfp385b	198.618	-1.02822	0.333873	-3.07968	0.00207225	0.00785917
Loxl4	29.5104	-1.02638	0.255889	-4.01102	6.04568e-05	0.000479374
Cyp2u1	96.6338	-1.02604	0.247891	-4.13909	3.48686e-05	0.0003078
Mab21l2	8.72963	-1.02578	0.402174	-2.55058	0.0107544	0.0298102
Dclk3	13.2071	-1.02509	0.262278	-3.9084	9.29104e-05	0.000675217
Fgd3	9.66667	-1.02395	0.380247	-2.69285	0.0070844	0.0211459
Pde10a	139.07	-1.02283	0.193746	-5.27924	1.29718e-07	3.91895e-06
Col14a1	192.686	-1.02201	0.385137	-2.65363	0.00796317	0.0233126
Slc16a7	9.12907	-1.022	0.352626	-2.89826	0.00375241	0.0126857
Tnxb	1217.62	-1.02163	0.159417	-6.40849	1.46966e-10	1.7727e-08
Gm16576	196.458	-1.02133	0.265354	-3.84894	0.000118629	0.000824333
B4galnt3	19.3105	-1.02079	0.424192	-2.40644	0.0161089	0.0414562
Rims4	24.4844	-1.02055	0.261729	-3.89925	9.64916e-05	0.000697181
Zfp493	51.3579	-1.02045	0.205352	-4.96928	6.72026e-07	1.41986e-05
Nwd1	48.5159	-1.01952	0.321249	-3.17362	0.00150553	0.00610023
Sipa1l3	134.918	-1.01853	0.211125	-4.82431	1.4049e-06	2.53199e-05
5031439G07Rik	3612.67	-1.01679	0.17832	-5.70205	1.18379e-08	5.85123e-07
Dgkh	25.9079	-1.01615	0.268556	-3.78376	0.000154474	0.00100757
Trpm6	7.94121	-1.01523	0.344418	-2.94767	0.00320181	0.0111604
Zfhx2	208.056	-1.01379	0.206599	-4.90705	9.24585e-07	1.82467e-05
Pcdhgb7	23.0554	-1.0137	0.417165	-2.42996	0.0151004	0.0392707
Sorcs1	14.192	-1.01266	0.274567	-3.68822	0.000225827	0.00135874
Lama2	860.142	-1.01018	0.180932	-5.5832	2.36135e-08	1.00929e-06
Nhs	50.6778	-1.01009	0.37888	-2.66599	0.00767626	0.0226449
Abl2	799.04	-1.00895	0.169252	-5.9612	2.50386e-09	1.70041e-07
Nr1d1	4293.15	-1.00714	0.196285	-5.13099	2.88221e-07	7.35941e-06
Aqp4	879.425	-1.00661	0.157178	-6.40426	1.51098e-10	1.78263e-08
Rapgef5	82.5232	-1.00502	0.41581	-2.41701	0.0156485	0.0405006
Lrch3	294.962	-1.00498	0.34271	-2.93245	0.00336299	0.011617
Rab11fip3	2749.28	-1.00434	0.209188	-4.80112	1.57783e-06	2.78762e-05
Rybp	48.2012	-1.00401	0.30143	-3.33084	0.000865857	0.00390481
Akap5	26.1994	-1.00331	0.311932	-3.21643	0.00129795	0.00540857
Lrp1	1670.03	-1.00287	0.167947	-5.97134	2.35311e-09	1.63233e-07
Abca8b	574.109	-1.00282	0.196428	-5.1053	3.30271e-07	8.16355e-06
Zfp532	404.768	-1.00275	0.161221	-6.21969	4.98133e-10	4.73607e-08
3110021N24Rik	148.75	-1.00185	0.221583	-4.52135	6.14472e-06	8.02887e-05
Heatr5a	666.872	-1.00062	0.176499	-5.66926	1.43419e-08	6.66117e-07
Zfyve26	463.298	-1.00054	0.215251	-4.64825	3.34757e-06	4.99601e-05
Emilin3	7.23836	-1.00048	0.407658	-2.45422	0.0141189	0.037191
Heatr5b	242.639	-1.00045	0.21955	-4.55682	5.19348e-06	7.04805e-05
Bace1	1161.22	-1.00041	0.188666	-5.30252	1.14213e-07	3.53597e-06
C230081A13Rik	492.965	-0.99811	0.210929	-4.73198	2.22345e-06	3.6522e-05
Carm1	1273.93	-0.997916	0.333313	-2.99394	0.00275404	0.00985903
Efr3b	241.623	-0.997913	0.160063	-6.23449	4.53258e-10	4.41326e-08
Clcn1	3715.12	-0.997527	0.321088	-3.10671	0.00189184	0.00734513
Scrn1	14.7021	-0.996446	0.291062	-3.42348	0.000618255	0.00298919
Ano5	4405.65	-0.995973	0.163352	-6.09708	1.08024e-09	8.81816e-08
Cdh23	195.143	-0.995752	0.238413	-4.17657	2.95932e-05	0.000269321
Cnot1	1594.76	-0.993132	0.237695	-4.17818	2.93853e-05	0.000267731
Galntl2	207.118	-0.992951	0.373571	-2.65799	0.00786071	0.0230753
Usp53	264.084	-0.992146	0.355158	-2.79354	0.00521353	0.0165358
Alkbh8	166.809	-0.991546	0.249992	-3.96631	7.29928e-05	0.000557606
Atp11a	1295.08	-0.990989	0.177887	-5.5709	2.5343e-08	1.07088e-06
Alms1	20.7337	-0.990616	0.236752	-4.18418	2.86193e-05	0.000261724
Flnb	533.932	-0.990614	0.19012	-5.21047	1.88367e-07	5.28573e-06
Adam19	151.705	-0.989588	0.266629	-3.71148	0.000206051	0.00125676
Fras1	40.2825	-0.98943	0.340001	-2.91008	0.00361334	0.0122927
Ptprf	49.5225	-0.987348	0.161906	-6.0983	1.07205e-09	8.81816e-08
Clock	706.054	-0.986226	0.188868	-5.22177	1.77225e-07	5.02543e-06
Brwd3	48.0845	-0.986063	0.287663	-3.42784	0.000608398	0.0029539
Synpo2	10138	-0.985252	0.328172	-3.00224	0.00267999	0.00964953
Zc3hav1l	18.0565	-0.985002	0.312345	-3.15357	0.00161288	0.0064511
Elk4	296.916	-0.983615	0.290816	-3.38226	0.000718929	0.00337735
Mmrn1	48.551	-0.983383	0.273045	-3.60154	0.000316333	0.0017655
Mertk	64.4191	-0.981427	0.206405	-4.75487	1.98579e-06	3.34747e-05
Pygo1	189.691	-0.980628	0.191618	-5.11762	3.09408e-07	7.76548e-06
Klf12	184.851	-0.979587	0.308358	-3.17678	0.00148918	0.00604459
Gli2	20.3029	-0.979502	0.287722	-3.40433	0.000663257	0.00316138
Creb3l1	88.9357	-0.979415	0.21137	-4.63364	3.59284e-06	5.31531e-05
Dapk1	98.2132	-0.978083	0.229135	-4.26859	1.96711e-05	0.000195658
Atp10a	41.1113	-0.978031	0.210054	-4.6561	3.22253e-06	4.85875e-05
Solh	125.196	-0.976979	0.37463	-2.60785	0.00911134	0.0260234
Sox6	3149.89	-0.976544	0.228482	-4.27406	1.91946e-05	0.000192442
Nup210	820.678	-0.9764	0.212193	-4.60148	4.19497e-06	6.01872e-05
Tulp4	1575.85	-0.976216	0.230158	-4.2415	2.22033e-05	0.000215326
Nr2c2	355.159	-0.975085	0.30478	-3.19931	0.00137758	0.0056844
Khnyn	197.546	-0.974514	0.269474	-3.61635	0.000298781	0.00169089
Adcy3	34.0946	-0.973655	0.225417	-4.31935	1.5649e-05	0.000164671
Arhgef10	200.981	-0.973434	0.142928	-6.81066	9.71505e-12	1.70125e-09
Stard4	47.1543	-0.973402	0.221871	-4.38724	1.14797e-05	0.000129478
Eif2c3	93.836	-0.97282	0.235853	-4.12468	3.71245e-05	0.00032474
Atp6v0a2	396.1	-0.972815	0.262702	-3.70311	0.000212971	0.00129262
Apc2	24.5855	-0.970287	0.286343	-3.38855	0.000702633	0.00331678
Arid5b	166.127	-0.970272	0.185387	-5.23375	1.66102e-07	4.76013e-06
Crlf1	58.0375	-0.969251	0.215569	-4.49625	6.9163e-06	8.79529e-05
Plxna3	18.0817	-0.969086	0.289556	-3.3468	0.000817489	0.00373779
Mob1b	290.806	-0.968451	0.303386	-3.19214	0.00141221	0.00579916
Tnfrsf14	13.5459	-0.968449	0.296159	-3.27003	0.00107535	0.00465977
Stox2	269.158	-0.968004	0.135647	-7.1362	9.59429e-13	2.50117e-10
Prrc2b	5043.96	-0.967597	0.23407	-4.13379	3.56825e-05	0.000314127
Cacna1h	92.0189	-0.966572	0.256671	-3.76581	0.000166011	0.00106809
Styx	219.844	-0.965601	0.201464	-4.79293	1.6436e-06	2.87505e-05
Zbtb40	257	-0.965519	0.153967	-6.27093	3.58909e-10	3.55892e-08
Amph	11.9056	-0.96528	0.325061	-2.96953	0.00298256	0.010524
Tmem233	1362.11	-0.964716	0.321306	-3.00248	0.00267788	0.00964407
Ksr1	2467.64	-0.964625	0.331252	-2.91206	0.00359052	0.0122493
Disp1	79.1422	-0.964393	0.17818	-5.41245	6.21684e-08	2.19395e-06
Kdm2b	236.275	-0.963626	0.295902	-3.25657	0.00112765	0.00485258
Cnot6	167.009	-0.962725	0.300251	-3.2064	0.00134407	0.00556601
Ikzf4	8.7272	-0.962351	0.398442	-2.41528	0.015723	0.0406545
Kcnj12	1080.9	-0.961822	0.173599	-5.54049	3.01622e-08	1.23109e-06
Gfra1	61.5387	-0.96106	0.25082	-3.83168	0.000127274	0.000872773
Cbfa2t3	637.024	-0.96046	0.151013	-6.36012	2.01592e-10	2.26273e-08
Gk5	14.3852	-0.960054	0.3644	-2.63462	0.0084232	0.0244117
Vav2	47.312	-0.959729	0.306222	-3.1341	0.00172382	0.00679707
Nt5dc3	3256.63	-0.95905	0.226114	-4.24145	2.22081e-05	0.000215326
Cilp2	98.5808	-0.957622	0.370507	-2.58463	0.00974849	0.0275319
Rps6ka3	485.227	-0.954778	0.309788	-3.08203	0.00205591	0.00781509
3200001D21Rik	7.53545	-0.954488	0.35656	-2.67693	0.00742995	0.0220404
Cd248	217.137	-0.954083	0.269235	-3.54368	0.000394583	0.00210067
Myh13	149.61	-0.954083	0.244042	-3.9095	9.24887e-05	0.000673376
Arhgap31	685.989	-0.953218	0.188389	-5.05983	4.1962e-07	9.77077e-06
Irs1	1618.78	-0.951412	0.15661	-6.07505	1.23951e-09	1.00171e-07
Ubr4	5177.17	-0.951313	0.291808	-3.26006	0.00111389	0.00480485
Filip1	1633.07	-0.950923	0.309874	-3.06874	0.0021496	0.0080913
Aplnr	223.356	-0.95091	0.388745	-2.4461	0.0144411	0.0378852

## Sheet: eTable S3 6m vs. 24
|log2fc|≥1, qval≤0.05
gene id	base Mean	log2 Fold Change	lfc SE	stat	pvalue	padj
Cntn2	72.1125	6.53331	1.2606	5.18272	2.18676e-07	0.000160019		eTable S3 Gene Expression Changes from 6 to 24 months of age.
Orm2	9.99925	6.19586	1.76478	3.51083	0.000446702	0.0369408		KEY: lfc SE = standard error of the log2 fold change, padj = qval = pvalue adjusted for multiple comparisons.
Bpifb1	18.9298	5.55498	1.33439	4.16293	3.14184e-05	0.00627021
Krt18	527.287	5.27252	1.05124	5.01553	5.28885e-07	0.000312591
Chrng	109.504	5.0882	1.09947	4.62788	3.69436e-06	0.00138467
Saa3	3.73389	4.76587	1.37702	3.46101	0.000538157	0.0419971
Atp13a4	4.84354	4.70908	1.31167	3.59013	0.000330517	0.0307822
Cacng4	7.45682	4.43092	1.17731	3.76361	0.00016748	0.0205894
Tmem151a	3.74803	4.33333	1.22808	3.52854	0.000417865	0.0356298
Rrad	884.892	4.09047	0.715158	5.71968	1.06727e-08	1.64008e-05
Ankrd55	12.5673	4.07552	0.907513	4.49086	7.09347e-06	0.00224088
Sln	516.004	3.82226	0.925788	4.12865	3.64897e-05	0.00700921
E130218I03Rik	3.45324	3.739	1.02958	3.63159	0.000281684	0.0279639
Ces2c	35.3971	3.7311	0.779946	4.78379	1.72023e-06	0.000801054
2410137F16Rik	230.619	3.65289	0.599663	6.09158	1.11804e-09	3.42965e-06
Gal	7.60628	3.47457	1.00199	3.46766	0.000525013	0.0418025
Erc2	36.0635	3.40783	0.310214	10.9854	4.49192e-28	6.90273e-24
Gdf5	62.3832	3.37884	0.625197	5.40444	6.501e-08	6.2438e-05
Hsf2bp	23.5535	3.37768	0.624427	5.40924	6.32925e-08	6.2438e-05
Spp1	170.366	3.36805	0.586681	5.74086	9.41981e-09	1.60838e-05
Gm2694	4.38933	3.3517	0.822549	4.07477	4.60605e-05	0.00832719
Orm1	22.5293	3.31978	0.771352	4.30385	1.67855e-05	0.00396836
Awat2	7.52628	3.28592	0.970442	3.38601	0.000709173	0.0502205
Fam26f	7.75026	3.20647	0.877075	3.65587	0.000256314	0.0267566
Ankrd1	2916.52	3.10339	0.67729	4.58208	4.60376e-06	0.00164526
Arhgdig	49.722	3.08036	0.660604	4.66294	3.11721e-06	0.00126058
Oprd1	5.66502	3.02119	0.662146	4.56272	5.04948e-06	0.00176353
Mt3	98.0851	3.01792	0.678455	4.44822	8.65846e-06	0.00247484
Serpina3g	6.03158	3.00561	0.876513	3.42905	0.000605695	0.0456261
Gsdma	10.1604	3.00419	0.808116	3.71752	0.000201189	0.0228261
Cxcl10	52.6861	2.98848	0.610972	4.89136	1.00143e-06	0.000530653
Gadd45a	2333.35	2.92535	0.677572	4.31739	1.57883e-05	0.00385109
Timp1	72.3245	2.91657	0.701634	4.15682	3.22702e-05	0.00627717
Runx1	380.394	2.86472	0.570987	5.01713	5.24481e-07	0.000312591
Ckap2	16.9042	2.81829	0.631536	4.46259	8.09749e-06	0.00239297
Cdkn1a	1048.22	2.69744	0.548746	4.91564	8.84927e-07	0.000493647
Cpne2	1156.36	2.69076	0.502494	5.3548	8.56488e-08	7.31203e-05
Ccl5	15.6103	2.6877	0.674369	3.9855	6.73377e-05	0.0108924
Aif1l	411.27	2.64404	0.581528	4.5467	5.44932e-06	0.00182043
Chrna1	1328.66	2.63309	0.586525	4.48931	7.14539e-06	0.00224088
Ggt6	9.65992	2.59308	0.758327	3.41948	0.000627406	0.0467304
E2f8	14.4865	2.58558	0.734867	3.51843	0.00043411	0.0364534
Uchl1	280.272	2.55077	0.605117	4.21533	2.4941e-05	0.00551314
Trem2	52.1081	2.50777	0.709388	3.53512	0.000407585	0.0349908
Slc23a3	6.85869	2.43969	0.663602	3.67644	0.000236512	0.0250654
Myog	226.117	2.41399	0.542802	4.44728	8.69664e-06	0.00247484
Top2a	40.681	2.41192	0.666008	3.62145	0.000292952	0.0284924
Acox2	10.1067	2.41136	0.568423	4.24219	2.21348e-05	0.00507679
Dnase1l3	11.9581	2.39235	0.506974	4.71887	2.37153e-06	0.00104124
C730002L08Rik	5.24769	2.36307	0.613278	3.85319	0.00011659	0.016437
Ccl8	83.7124	2.30647	0.649297	3.55226	0.000381932	0.0337308
Ccr7	8.1723	2.29463	0.617258	3.71746	0.000201233	0.0228261
Dtl	9.33759	2.27165	0.621605	3.65449	0.000257694	0.0267566
Klhdc8a	27.9538	2.24922	0.370996	6.06263	1.3391e-09	3.42965e-06
Foxq1	6.45634	2.23981	0.54323	4.12314	3.73748e-05	0.00709061
Otos	3.56142	2.23486	0.652649	3.42429	0.000616415	0.0462071
Abhd15	49.9086	2.20976	0.557818	3.96143	7.45011e-05	0.0116822
Dupd1	3028.95	2.15198	0.564279	3.81367	0.000136916	0.0183936
Rap1gap2	423.742	2.13901	0.577727	3.70245	0.000213529	0.0238437
Cd52	62.2285	2.10088	0.591164	3.55381	0.0003797	0.0337274
4933415F23Rik	41.3694	2.09003	0.440095	4.74904	2.04381e-06	0.00092374
Gtse1	7.3338	2.08389	0.567625	3.67125	0.00024137	0.025405
Cd72	9.88731	2.05507	0.575167	3.573	0.000352914	0.0320902
BC021891	15.0029	1.96365	0.348538	5.63397	1.76109e-08	2.26759e-05
Tnfrsf23	304.131	1.92299	0.435319	4.41744	9.98779e-06	0.00274076
Lgals3	341.429	1.88746	0.505354	3.73492	0.000187774	0.0221963
A730090N16Rik	5.75943	1.87023	0.503162	3.71696	0.000201637	0.0228261
Cdk5r1	27.8298	1.83258	0.488332	3.75273	0.000174918	0.0211542
Kcnk5	59.7454	1.83093	0.471506	3.88316	0.000103106	0.0149233
Rrm2	45.1428	1.82008	0.433509	4.19849	2.68699e-05	0.00573486
Ampd3	535.838	1.80915	0.37605	4.81093	1.50226e-06	0.000721413
Gm12185	43.1382	1.80911	0.477493	3.78876	0.000151403	0.0195513
Tekt1	151.477	1.80855	0.448812	4.02963	5.58658e-05	0.00953877
Myl12a	9901.4	1.79486	0.453938	3.95397	7.68638e-05	0.0118117
Snhg11	27.3511	1.74094	0.221172	7.87141	3.5067e-15	1.79625e-11
Sema4f	12.0578	1.73572	0.511475	3.39356	0.000689896	0.0499557
Zap70	19.9178	1.72996	0.453769	3.81242	0.000137613	0.0183936
Zfp697	59.6903	1.69038	0.479215	3.5274	0.000419665	0.0356298
Cgref1	54.0025	1.66723	0.440702	3.78313	0.00015487	0.0198324
Ccna2	26.5307	1.6534	0.441031	3.74894	0.000177581	0.0211542
Ncam1	279.831	1.65335	0.480679	3.43962	0.000582529	0.044734
Sik1	686.903	1.61535	0.387793	4.1655	3.10671e-05	0.00627021
Cyp46a1	14.2484	1.56288	0.448266	3.4865	0.000489387	0.0393739
2810032G03Rik	14.0286	1.55714	0.421718	3.69238	0.000222163	0.0242377
8430408G22Rik	211.64	1.5538	0.392002	3.96376	7.37786e-05	0.0116822
Mfsd7a	133.254	1.53825	0.426559	3.60617	0.000310747	0.029296
Ddc	10.0231	1.53065	0.451315	3.39153	0.000695029	0.0499557
Shroom3	45.4384	1.52533	0.430925	3.53967	0.000400634	0.0348723
Tubb6	1152.05	1.51875	0.343337	4.42349	9.71205e-06	0.00271355
Rpl3	1736.88	1.504	0.407354	3.69212	0.000222393	0.0242377
Serpinb1a	180.647	1.4991	0.4357	3.44067	0.000580267	0.044734
Ak4	108.536	1.47575	0.144298	10.2271	1.49971e-24	1.1523e-20
Tlr2	69.5387	1.45724	0.337253	4.3209	1.55392e-05	0.00385109
Slc37a2	69.4907	1.44633	0.417905	3.46089	0.000538389	0.0419971
Ostn	408.54	1.38078	0.229918	6.00553	1.90706e-09	4.18654e-06
Prkcz	86.7131	1.38026	0.270565	5.10141	3.37124e-07	0.000215857
Gdnf	45.7347	1.37678	0.350309	3.93018	8.48808e-05	0.0127879
Rab13	349.738	1.37106	0.396634	3.45674	0.000546742	0.0424333
Mustn1	3164.12	1.35243	0.375347	3.60315	0.000314379	0.0294577
Lag3	11.7483	1.32399	0.382458	3.46179	0.000536605	0.0419971
Scamp5	68.4021	1.31318	0.325878	4.02966	5.58587e-05	0.00953877
Tmem8	69.053	1.2928	0.281345	4.59507	4.32604e-06	0.00158281
Cd28	44.1855	1.24152	0.363441	3.41602	0.000635447	0.0468653
Slc7a5	96.966	1.22233	0.311854	3.91956	8.87097e-05	0.013235
Obfc2a	732.284	1.19913	0.336956	3.55873	0.000372651	0.0336855
Hip1r	504.587	1.19091	0.278297	4.27929	1.87488e-05	0.00436534
Spsb2	133.642	1.18097	0.333508	3.54105	0.000398538	0.0348723
Galns	61.2208	1.17466	0.341652	3.43817	0.000585651	0.044734
Spata24	94.1567	1.14266	0.319407	3.57745	0.000346958	0.0317363
Bid	25.7711	1.13864	0.309046	3.68436	0.000229274	0.0246382
Cyr61	1476.01	1.13532	0.211268	5.37385	7.70736e-08	6.967e-05
Depdc7	97.9329	1.13397	0.282536	4.01352	5.9819e-05	0.00999172
Spint2	136.317	1.12974	0.303895	3.71754	0.000201172	0.0228261
Pou2f2	21.0188	1.1074	0.315802	3.50663	0.000453824	0.0372937
Zmynd17	2569.31	1.08852	0.210555	5.16977	2.34377e-07	0.000163712
Id2	151.67	1.06043	0.292163	3.62958	0.000283879	0.0279639
Car3	96814.8	1.05391	0.21635	4.87132	1.10853e-06	0.000567828
Rb1	1013.6	1.04057	0.303405	3.42963	0.000604394	0.0456261
Car1	15.8342	1.03618	0.28952	3.57894	0.000344989	0.0317363
Hells	15.8001	1.0358	0.305524	3.39023	0.000698336	0.0499557
2010300C02Rik	51.3226	1.03208	0.222558	4.63734	3.52918e-06	0.00137367
Fam196b	25.3164	1.0258	0.267872	3.82944	0.000128437	0.0176223
Ccdc122	85.7657	1.0245	0.256397	3.99575	6.44895e-05	0.0105427
Trp63	325.798	1.0041	0.286022	3.51058	0.000447127	0.0369408
Lrp11	108.197	0.99861	0.290541	3.43708	0.000588031	0.044734
Nfkb2	576.535	0.992846	0.212579	4.67049	3.00484e-06	0.00124798
Wbscr27	56.5071	0.990731	0.29081	3.40679	0.000657305	0.0478711
Pkdrej	64.739	0.989997	0.236735	4.18188	2.89109e-05	0.00608595
Pld5	83.4865	0.976781	0.223065	4.3789	1.19279e-05	0.00321571
Nme4	47.7397	0.959332	0.227882	4.20977	2.55626e-05	0.00553269
|Log2fc|≤1.0, padj≤0.05
Gene ID	base Mean	log2 Fold Change	lfc SE	stat	pvalue	padj
9130404H23Rik	8.58509	-2.87098	0.664246	-4.32216	1.5451e-05	0.00385109
Ly6g6e	15.1254	-1.59597	0.286744	-5.56582	2.60924e-08	3.08432e-05
1700001O22Rik	362.506	-1.58706	0.381709	-4.15777	3.21363e-05	0.00627717
Grem2	100.161	-1.41576	0.364145	-3.88791	0.000101111	0.0147978
Gck	119.043	-1.40397	0.244464	-5.74305	9.29868e-09	1.60838e-05
Snph	52.7429	-1.17908	0.348463	-3.38366	0.000715263	0.0504195
Slc38a4	2766.01	-1.03755	0.275073	-3.7719	0.000162011	0.0204068
Fam65b	136.208	-0.987959	0.236602	-4.17562	2.97177e-05	0.00617125
