# Supplementary material for: Skeletal Muscle Transcriptome Alterations Related to Declining Physical Function in Older Mice
Source: J Ageing Longev. Author manuscript; Available in PMC 2023 Oct 24. (PMC10597580; doi:10.3390/jal3020013)
Supplement: JAL3020013 Supplementary Material [file NIHMS1905574-supplement-JAL3020013__Supplementary_Material.zip › eTable S4-S9 GSEA and GOrilla_vf.xlsx]

## Sheet: eTableS4 GSEA 6m vs. 28m
pathway	gene_id	base Mean	log2 Fold Change	lfc SE	stat	pvalue	padj		eTable S4 GSEA Results from 6 to 28 months of age.
LIT_MM_DIVINA_TOTAL-TESTIS_PEM-1-2PEMTT_MAPPED_DIFF	5330417C22RIK	0.767786	-3.23857	1.10976	-2.91827	0.00351978	0.0120644		KEY: pathway = GSEA pathway. lfc SE = standard error of the log2 fold change, padj = pvalue adjusted for multiple comparisons.
LIT_MM_SHE_CNV-GENE_WITHIN-SDS_DIFF	NLRP1C-PS	0.953909	-3.10599	1.10258	-2.81703	0.00484693	0.0155995		Data from GSEA as explained in the main text.
LIT_MM_LAROSA_T10C12-CLA-WAT_TUNICAMYCIN-3T3-L1-ADIPOCYTE_DIFF	OXCT2A	0.923789	-3.02391	1.11037	-2.72335	0.00646241	0.0196924
LIT_MM_DIVINA_GERMINAL-CELL_DN	1700001K23RIK	0.848712	-2.94869	1.16927	-2.52183	0.0116746	0.0318261
LIT_MM_ULLOA-MONTOYA_MAPC_MSC-ESC_UP	KCNG1	1.35612	-2.77617	0.951818	-2.91671	0.00353749	0.0121137
LIT_MM_BARRERA_BRAIN_PROMOTER_DIFF	GPR165	0.907664	-2.58775	1.10704	-2.33753	0.0194115	0.0480765
LIT_MM_NIAKAN_SOX17_CHIP-CHIP_XEN-CELL_DIFF	FBXO48	2.35582	-2.57941	0.753151	-3.42483	0.000615182	0.00298057
LIT_MM_RENTHAL_COCAINE-HDAC5KO_COCAINE_DN	1700071M16RIK	13.0355	-2.55566	0.516759	-4.94556	7.59251e-07	1.55143e-05
LIT_MM_YAO_BDF1-MOUSE_TESTIS_FUNCTION_DIFF	1700001O22RIK	258.298	-2.53669	0.490308	-5.17366	2.29552e-07	6.18374e-06
LIT_MM_STEGMANN_LOW-ENDODERM_VS_HIGH-VILLI_PRIMO-DATABASE_UP	PRAP1	3.75872	-2.51258	0.626585	-4.00996	6.07302e-05	0.000480183
LIT_MM_CHAHROUR_MECP2-NULL_HYPOTHALAMI_DN	E130008D07RIK	2.9919	-2.51003	0.733917	-3.42004	0.000626116	0.00302177
LIT_MM_HODGES_R6-1_BRAIN_HUNTINGTON_DISTANCE-MOVED_30M_DIFF	TRIM9	0.888188	-2.50814	1.07349	-2.33644	0.0194683	0.0481729
LIT_MM_ALVARADO_GATA3-OVER-EXPRESSION_DN	ZFP366	52.2339	-2.47652	0.488595	-5.06866	4.00629e-07	9.45232e-06
LIT_MM_PORTER_DIAPHRAGM_VS_HINDLIMB-MUSCLE_DIFF	GREM2	74.6733	-2.44809	0.35489	-6.89815	5.26846e-12	1.06004e-09
LIT_MM_CHAHROUR_MECP2-TG_UP	RGAG1	2.53124	-2.44116	0.749366	-3.25764	0.00112344	0.004837
LIT_MM_HEWITT_2H_INJECTED-VEHICLE-ESTREN-19NT-E2_DIFF	DUOX2	1.42659	-2.43897	0.98339	-2.48017	0.0131321	0.0349965
LIT_MM_MAJUMDER_RAPAMYCIN-INHIBITOR_DIFF	NOS1	1361.27	-2.41179	0.630318	-3.8263	0.000130083	0.000887102
LIT_MM_FUNATSU_DORSAL-REGION_UP	EPHA3	11.2006	-2.3848	0.403326	-5.91282	3.36293e-09	2.14842e-07
LIT_MM_GOVONI_24H-GH-TREATMENT_UP	IL1RL2	13.598	-2.34559	0.445919	-5.26013	1.43956e-07	4.26928e-06
LIT_MM_ZHANG_NERVOUS-SYSTEM_RNA-METABOLISM_UP	NPTXR	2.73535	-2.34379	0.680588	-3.44377	0.000573656	0.00282855
LIT_MM_APRIL_MELAN_IMPOVERISHED_DN	2700086A05RIK	4.38349	-2.31108	0.532391	-4.34095	1.41865e-05	0.000153004
LIT_MM_ESCUDERO_MOCK_VP16_KK1-CELL_UP	GM16982	2.68841	-2.2838	0.730183	-3.12772	0.00176171	0.0069264
LIT_MM_LU_NON-BRANCHING-REGION_EMBRYONIC-LUNG_UP	NRK	3.22564	-2.26597	0.929886	-2.43682	0.0148171	0.0386958
LIT_MM_ZHU_LBP_LP_DIFF	HIST1H2AF	2.578	-2.26069	0.764751	-2.95612	0.00311538	0.0108921
LIT_MM_BRANNIAN_LETHAL-YELLOW_PIOGLITAZONE_VEHICLE_UP	TLL2	1.62355	-2.24227	0.903865	-2.48076	0.0131103	0.03495
LIT_MM_CLOONAN_ESC_LIBRARY_UP	IGSF9B	3.46767	-2.20865	0.658022	-3.3565	0.000789368	0.00363388
LIT_MM_MEHRABIAN_LIVER_BXD-CROSS_ALOX5-LOCUS_DIFF	NECAB1	3.79002	-2.19518	0.615053	-3.56909	0.000358228	0.00194689
LIT_MM_ZENG_8-CELL-TRANSIENT_PREIMPLANTATION_DIFF	GPR161	5.00636	-2.19442	0.554317	-3.95879	7.53309e-05	0.000571362
LIT_MM_ZHANG_PANCREATIC-ISLETS_FSK_UP	NR4A3	62.1771	-2.19262	0.721393	-3.03942	0.00237031	0.008721
LIT_MM_SARTOR_HEPATOMA_NAIVE-DMSO-TREATED_AHR-TARGET_DIFF	COL6A6	69.1493	-2.16482	0.290961	-7.44023	1.00508e-13	3.3844e-11
LIT_MM_BHASKARA_TAMOXIFEN_72H_HDAC3FL-MEF_UP	HIST1H1B	2.49716	-2.14816	0.709703	-3.02685	0.00247118	0.00901724
LIT_MM_KELLY_SPINAL-CORD_CORTICAL_UP	CDKL5	8.54651	-2.12491	0.443402	-4.79228	1.64899e-06	2.87945e-05
LIT_MM_IACOBAS_KIDNEY_CHRONIC-HYPOXIA_GENDERS_DN	ADAMTS12	45.5564	-2.08361	0.341236	-6.10607	1.02116e-09	8.57667e-08
LIT_MM_RAEFSKI_FIBROBLAST_DN	TEX15	1.7532	-2.07921	0.804878	-2.58326	0.00978712	0.027616
LIT_MM_TOMCZAK_MYOGENIC_2D_C3_DIFF	CPEB4	638.856	-2.07033	0.568837	-3.63957	0.00027309	0.00157024
LIT_MM_TVRDIK_R4-E10.5_HOXB1A1_VS_A1-EMBRYO_UP	SAMD5	20.1827	-2.06173	0.359566	-5.73394	9.81212e-09	5.01878e-07
LIT_MM_WELCH_GATA_1-7H_DIFF	HIPK2	733.999	-2.01867	0.295975	-6.82041	9.07827e-12	1.63036e-09
LIT_MM_TURK_INBRED-STRAIN_DIFF	SSTR4	2.28447	-1.99825	0.776708	-2.57272	0.0100903	0.0283289
LIT_MM_CHEN_TE14.5C_VS_E14.5M_NEPHRON_UP	LGI2	21.7495	-1.99734	0.271294	-7.36228	1.80791e-13	5.84426e-11
LIT_MM_KALAJZIC_UNSORTED-CULTURE_17D_VS_7D_SORTED-OSTEOBLAST_2.3GFPPOS_VS_2.3GFPNEG_UP	BMP8A	12.7732	-1.9525	0.544622	-3.58506	0.000336997	0.00185583
LIT_MM_BEVERDAM_11.5DPC-MALE-SOMATIC-CELL_TOP40_DN	ASXL3	5.16665	-1.94508	0.488711	-3.98002	6.89103e-05	0.000533172
LIT_MM_POTIREDDY_MMRNA_LATE-1-CELL-EMBRYOS_UP	SHROOM4	73.4513	-1.94391	0.691247	-2.81217	0.00492079	0.0157807
LIT_MM_SPACH_CNS_1-25-OH-2D3_DN	SLC26A1	3.8584	-1.93696	0.557064	-3.47709	0.00050689	0.00256668
LIT_MM_DIVINA_TOTAL-TESTIS_PEM-1-2PEMTT_MAPPED_DIFF	GM5105	187.939	-1.93046	0.305016	-6.32906	2.46658e-10	2.68917e-08
LIT_MM_TOLGYESI_OVA_30D_LUNG_UP	C7	219.761	-1.91902	0.279974	-6.85428	7.1674e-12	1.34705e-09
LIT_MM_YAMASAKI_WORKING-MEMORY_LOCOMOTOR_ACTIVITY_DIFF	1700007J10RIK	2.73407	-1.91879	0.761857	-2.51857	0.0117833	0.0320629
LIT_MM_BEVERDAM_11.5DPC-FEMALE-SOMATIC-CELL_TOP40_UP	SLITRK1	2.61835	-1.9133	0.706473	-2.70824	0.00676414	0.0203895
LIT_MM_LIM_XEN-CELL_SALL4-BOUND-GENE_DIFF	GM9833	2.69785	-1.91163	0.655596	-2.91586	0.00354704	0.0121361
LIT_MM_RECINOS_LIVER_DIETARY-FAT_LDLR-PLUS_VS_PLUS-HF-LF_DN	TDO2	2.16564	-1.91088	0.754395	-2.533	0.0113091	0.0310233
LIT_MM_HALDAR_SYT-SSX_DN	SEC14L5	299.885	-1.90239	0.469508	-4.05188	5.08081e-05	0.000416436
LIT_MM_MEHRABIAN_LIVER_BXD-CROSS_ALOX5-LOCUS_DIFF	GLIS3	3.74527	-1.87546	0.57263	-3.27518	0.00105596	0.00459915
LIT_MM_MEHRABIAN_LIVER_BXD-CROSS_ALOX5-LOCUS_DIFF	PRIMA1	38.6754	-1.87114	0.443475	-4.21927	2.45094e-05	0.000233163
LIT_MM_SHEN_ESCELL_H3K27ME3-TARGET_BFEZH1-TARGET_DIFF	NT5C1A	202.742	-1.86485	0.582018	-3.20411	0.00135483	0.00560484
LIT_MM_MIROTSOU_MI-LV_TAC-LV_TAC-SEPTUM_UP	COL1A1	2978.87	-1.85801	0.608149	-3.0552	0.00224912	0.00835499
MSIGDB_MM_BRUINS_UVC_RESPONSE_VIA_TP53_GROUP_D	EIF2C2	752.171	-1.85436	0.456136	-4.06536	4.79581e-05	0.000398328
LIT_MM_TURK_INBRED-STRAIN_DIFF	ROR1	16.2648	-1.85331	0.488743	-3.79199	0.000149446	0.000984311
LIT_MM_CHAHROUR_MECP2-TG_DN	BEST3	304.192	-1.85274	0.502339	-3.68822	0.000225827	0.00135874
LIT_MM_RECINOS_LIVER_DIETARY-FAT_LDLR-PLUS_VS_PLUS-HF-LF_DN	SLC38A4	2130.4	-1.82077	0.243947	-7.46379	8.40675e-14	2.95388e-11
LIT_MM_MITCHELL_P38_HEART_DN	KCNV2	6.21331	-1.82	0.6376	-2.85446	0.00431105	0.0141698
LIT_MM_COMELLI_GLYCOSYL-SULFO-TRANSFERASE_FRESH_ACTIVATED-T_B-LYMPHOCYTE_DIFF	XYLT1	36.5329	-1.81862	0.40937	-4.44249	8.89254e-06	0.000106546
LOC_MM_CHR5_E5	BTBD8	14.8409	-1.80452	0.419193	-4.30475	1.67175e-05	0.000173319
LIT_MM_BUCHSTALLER_C1_E9.5_UP	ROBO1	26.052	-1.80435	0.283812	-6.35755	2.04996e-10	2.28507e-08
LIT_MM_SUSZTAK_DB-DB_VS_DB-M_DIFF	MEGF9	43.2722	-1.79783	0.64475	-2.78841	0.00529676	0.016734
LIT_MM_BERGER_DIETARY-LC-PUFAS_HIPPOCAMPUS_DIFF	PAX9	2.49667	-1.79054	0.720722	-2.48437	0.0129782	0.0346663
LIT_MM_PUSCHENDORF_EXHIBITING_MILRINONE-TREATMENT_DN	CYYR1	124.516	-1.78824	0.487537	-3.66792	0.000244535	0.00144724
LIT_MM_LANG_SOCS3_VS_MACROPHAGES_400TREATMENT_IL-6_DN	ADCY9	794.531	-1.77748	0.554173	-3.20745	0.00133918	0.0055486
LIT_MM_DIVINA_TOTAL-TESTIS_PEM-1-2PEMTT_MAPPED_DIFF	ARHGAP20	755.526	-1.76844	0.298669	-5.92109	3.19812e-09	2.06765e-07
LIT_MM_CHALLEN_4-HYBRIDIZATION_10.5DPC-IM_VS_MM_UP	RIAN	122.591	-1.76749	0.373844	-4.72787	2.26885e-06	3.70418e-05
LIT_MM_HALDAR_SYT-SSX_UP	STON1	65.4657	-1.76535	0.336839	-5.24095	1.5975e-07	4.61902e-06
LIT_MM_TOMCZAK_MYOGENIC_2D_C2_DIFF	BMPR2	518.558	-1.76329	0.470718	-3.74596	0.000179708	0.00113728
LIT_MM_ZENG_2-CELL-TRANSIENT_PREIMPLANTATION_DIFF	PDPR	1475.37	-1.7515	0.625504	-2.80015	0.00510792	0.016271
LIT_MM_ZHU_LBP_LP_DIFF	PROKR1	14.0466	-1.74792	0.31454	-5.55706	2.74358e-08	1.13596e-06
LIT_MM_HUBER_LYMPHOTOXIN-BETA_LYMPH-NODE_FOLLICULAR-DENDRITIC-CELL_UP	NEBL	4.22132	-1.7474	0.620631	-2.81552	0.00486977	0.0156575
LIT_MM_TURK_HINDLIMB-MUSCLE_DYSTROPHIN-DEFICIENT_DIFF	PAPLN	35.6078	-1.74154	0.477938	-3.64386	0.000268576	0.0015548
LIT_MM_SCIUTO_EXPOSURE-PHOSGENE_DIFF	HMBOX1	98.2296	-1.72946	0.363653	-4.75581	1.97654e-06	3.34172e-05
LIT_MM_TURK_HINDLIMB-MUSCLE_DYSTROPHIN-DEFICIENT_DIFF	NR5A2	6.30296	-1.7282	0.484877	-3.56419	0.000364978	0.00197692
LIT_MM_ZENG_MATERNAL-ZYGOTIC_PREIMPLANTATION_DIFF	MGAT5	8.80738	-1.7248	0.391591	-4.40461	1.05974e-05	0.000121221
LIT_MM_RANGASAMY_A_J_LUNG_CS_AIR_VARIOUS-TIME-PERIODS_UP	HIST1H3G	2.92365	-1.71897	0.605037	-2.8411	0.00449586	0.0146594
LIT_MM_HOFFMANN_LARGE_VS_SMALL-PRE-BII-CELL_DIFF	FCER2A	5.04504	-1.71527	0.48593	-3.52987	0.000415758	0.00218676
GENESIGDB_MM_BUONOMO_11_VIRAL_1	SPNA1	3.85771	-1.71416	0.641432	-2.6724	0.0075311	0.0222858
LIT_MM_AKSU_ADIPOSE_HIGH-BODY-WEIGHT_DN	9930111J21RIK1	10.93	-1.71146	0.337045	-5.07784	3.81745e-07	9.0807e-06
LIT_MM_TVRDIK_R4-E10.5_HOXB1A1_VS_A1-EMBRYO_DN	ZBED6	497.014	-1.69262	0.469998	-3.60133	0.000316589	0.00176632
LIT_MM_BUCHSTALLER_C3_E12_E14_UP	CLCN5	14.6892	-1.68852	0.513008	-3.29141	0.000996874	0.00438673
LOC_MM_CHRX_C3	GM14827	6.4751	-1.68315	0.437026	-3.85137	0.00011746	0.000817263
LIT_MM_SCHADE_ACTIVATED-NEU-MUTANT_BASIS_DIFF	PDE3A	32.3454	-1.68212	0.335527	-5.01335	5.34908e-07	1.1795e-05
LIT_MM_PORTER_DIAPHRAGM_VS_HINDLIMB-MUSCLE_DIFF	CHAD	162.841	-1.6772	0.557247	-3.00979	0.00261428	0.00945505
LIT_MM_CHAHROUR_MECP2-TG_UP	D830031N03RIK	132.371	-1.67512	0.417216	-4.01499	5.94471e-05	0.000473089
LIT_MM_DIVINA_TOTAL-TESTIS_PEM-1-2PEMTT_MAPPED_DIFF	CBL	72.5193	-1.67422	0.370652	-4.51697	6.27296e-06	8.15388e-05
LIT_MM_HEWITT_2H_INJECTED-VEHICLE-ESTREN-19NT-E2_DIFF	TMEM200A	2.96161	-1.65759	0.671035	-2.4702	0.0135037	0.0358215
LIT_MM_DIVINA_X-LINKED_TOTAL-TESTIS_ADULT-TESTIS-SOMATIC-CELL_DIFF	AFF2	3.23681	-1.64092	0.617079	-2.65917	0.00783333	0.0230117
LIT_MM_HAMRA_I-NC-LIST_POSTNATAL-TESTIS_DIFF	SMOX	6804.81	-1.63616	0.250083	-6.54248	6.0506e-11	8.81043e-09
LIT_MM_TOSCANO_HIPPOCAMPUS_COX1-KO_COX2KO_DIFF	SNPH	40.2441	-1.63472	0.35806	-4.56549	4.9834e-06	6.83178e-05
LIT_MM_MIJALSKI_16DUAL-COLOR_HYBRIDIZATIONS_KIDNEY_UP	CAR12	3.73144	-1.6345	0.557142	-2.93372	0.00334926	0.011577
LIT_MM_DIVINA_GERMINAL-CELL_DN	LDHAL6B	4.46657	-1.6339	0.506245	-3.22748	0.00124886	0.00524159
MSIGDB_MM_MEISSNER_NPC_HCP_WITH_H3K4ME3_AND_H3K27ME3	CCDC48	10.5015	-1.63279	0.337854	-4.83282	1.34615e-06	2.45851e-05
LIT_MM_MAJUMDER_RAPAMYCIN-INHIBITOR_DIFF	SLC25A30	80.0768	-1.63179	0.358859	-4.54714	5.43788e-06	7.30004e-05
LIT_MM_SHETH_PAM5_TUMOR_LIVER_TXNIP-DEFICIENT_DIFF	FGD4	130.962	-1.61221	0.251421	-6.41238	1.43262e-10	1.7542e-08
LIT_MM_ESAU_LIVER_4W_ALINE_VS_MIR-122-ASO-2W_DN	GPR135	2.7952	-1.60666	0.609067	-2.63789	0.00834225	0.0242162
LIT_MM_FUKADA_QUIESCENT-SATELLITE-CELL_VS_SATELLITE-CELL_UP	PAX7	34.7841	-1.60409	0.415221	-3.86322	0.000111904	0.000786393
LIT_MM_AKIMOTO_E16_VS_P6_DN	RGS9BP	21.5802	-1.60406	0.329107	-4.87396	1.09381e-06	2.09469e-05
LIT_MM_EAVES_IDD3-5_VS_NOD_THYMUS_UP	IGSF10	49.9688	-1.59778	0.356441	-4.4826	7.37376e-06	9.17602e-05
LIT_MM_MCINTYRE_EMX2_VS_EMX2_DN	PCDHGA11	14.0851	-1.59185	0.371541	-4.28445	1.83192e-05	0.000185639
LIT_MM_DIVINA_TOTAL-TESTIS_PEM-1-2PEMTT_MAPPED_DIFF	SACS	24.8646	-1.59143	0.320621	-4.96357	6.92084e-07	1.44785e-05
LIT_MM_PASINI_JARID2-BOUND-PROMOTERS-IN-ES-CELL-ESPRESSING-SCR-SHRNAS_DIFF	MSX1AS	2.51772	-1.59092	0.685014	-2.32246	0.0202082	0.0496843
LIT_MM_SADATE-NGATCHOU_TESTOSTERONE_UP	GDAP10	41.6463	-1.58159	0.413989	-3.82035	0.000133261	0.000901215
LIT_MM_RENTHAL_COCAINE-HDAC5KO_COCAINE_UP	PCDHGA9	5.47398	-1.57844	0.502129	-3.1435	0.00166942	0.00663471
LIT_MM_ZHU_LBP_LP_DIFF	ARL5B	158.466	-1.57835	0.356947	-4.4218	9.78822e-06	0.000113982
LIT_MM_LAFFAIRE_TS1CJE_EUPLOID_CEREBELLUM_P10_DN	ATF7	133.257	-1.57582	0.368787	-4.27298	1.92878e-05	0.000192914
LIT_MM_HOFFMANN_T-CELL_LYMPHOCYTE_C16_DIFF	FAM65B	108.993	-1.57577	0.202741	-7.77232	7.70586e-15	3.45972e-12
GENESIGDB_MM_BOYLAN_07_BONE	4831426I19RIK	64.1755	-1.57552	0.27705	-5.68679	1.29448e-08	6.24556e-07
LIT_MM_LEE_C6_GD-MODEL_DOPAMINERGIC-NEURON_ESC_DIFF	PPP1R12B	1701.83	-1.57532	0.509603	-3.09128	0.00199297	0.00762544
LIT_MM_LECLERC_OTHER-APCMIN_VS_TUMOR_DIFF	LAMA3	41.5736	-1.57339	0.252235	-6.23777	4.43862e-10	4.34796e-08
LIT_MM_PAN_ABSENT_VS_PRESENT_5FOLD_PRIMORDIAL_VS_PRIMARY-STAGE_UP	ZFP750	23.8266	-1.57142	0.228147	-6.88776	5.66796e-12	1.11721e-09
LIT_MM_HEWITT_24H_INJECTED-VEHICLE-ESTREN-19NT-E2_DIFF	ITGA11	74.8945	-1.56496	0.198804	-7.87187	3.49386e-15	1.71125e-12
LIT_MM_GEHRIG_P7_RETINOSCHISIN-DEFICIENT_RETINA_EARLY_DN	WASF3	8.08289	-1.5627	0.414308	-3.77183	0.000162054	0.00104958
LIT_MM_TOMCZAK_MYOGENIC_2D_C3_DIFF	ZFP652	665.833	-1.56173	0.297241	-5.25408	1.48763e-07	4.39572e-06
LIT_MM_SMIRNOVA_SPO11_JUVENILE-TESTE_DIFF	LCOR	59.7346	-1.56126	0.31204	-5.0034	5.63274e-07	1.23196e-05
LIT_MM_EAVES_IDD3_VS_NOD_UP	COL3A1	5320.87	-1.55856	0.617278	-2.52489	0.0115735	0.0316193
LIT_MM_KITAMURA_TOTAL-CELLULAR-FRACTION_LPS-TREATMENT_DN	DAGLA	237.164	-1.55593	0.189074	-8.22922	1.88444e-16	1.38446e-13
LIT_MM_MAJUMDER_RAPAMYCIN-INHIBITOR_DIFF	1700020I14RIK	2537.43	-1.55509	0.278534	-5.58312	2.36246e-08	1.00929e-06
LIT_MM_SUSZTAK_MESANGIAL-MATRIX_VS_MINIMALMESANGIAL_DIFF	BTAF1	622.93	-1.55249	0.161597	-9.60716	7.45753e-22	2.00893e-18
LIT_MM_EAVES_IDD3_VS_NOD_UP	FBN1	865.918	-1.54364	0.271155	-5.69283	1.24951e-08	6.11995e-07
LIT_MM_MIJALSKI_16DUAL-COLOR_HYBRIDIZATIONS_LIVER_UP	SLC36A4	19.4743	-1.54161	0.458733	-3.36058	0.000777782	0.0035918
LIT_MM_AKIMOTO_RHODOPSIN_ADULT-GFP_VS_E16_UP	SIK2	170.072	-1.53686	0.512747	-2.99731	0.00272371	0.0097786
LIT_MM_TOMCZAK_MYOGENIC_2D_C3_DIFF	OTOG	67.3216	-1.53312	0.359088	-4.26949	1.95917e-05	0.000195135
MSIGDB_MM_BRUINS_UVC_RESPONSE_VIA_TP53_GROUP_A	ODZ4	12.9279	-1.52085	0.343667	-4.42535	9.62856e-06	0.00011288
LIT_MM_NORKINA_CF-INTESTINE_UP	SLFN3	12.847	-1.5193	0.369245	-4.11463	3.87808e-05	0.000334301
LIT_MM_FANG_LACRIMAL-GLAND_CORNEAL-TRAUMA-ONCE_DIFF	ZFP369	32.6467	-1.51915	0.430195	-3.53131	0.000413508	0.00217776
LIT_MM_MILLER_FLUOXETINE-TREATED_DBA-HIPPOCAMPUS_UP	GPR17	37.8675	-1.51699	0.390571	-3.88403	0.000102739	0.000733146
LIT_MM_ZHU_UNIQUE-PATTERN_ANTI-IG_DIFF	HEG1	247.855	-1.51455	0.371847	-4.07303	4.64052e-05	0.000386822
LIT_MM_MCMULLEN_INSULIN_CARDIAC-MYOCYTE_DIFF	IRS2	298.322	-1.5143	0.382559	-3.95834	7.54733e-05	0.000571417
LIT_MM_MCINTYRE_EMX2_VS_EMX2_DN	PCDHGB6	32.9063	-1.51308	0.393026	-3.84983	0.000118202	0.000822075
LIT_MM_BYSTRYKH_TRANS_HEMATOPOIETIC-STEM-CELL-TRANSCRIPT_DIFF	HES5	3.33664	-1.50854	0.625285	-2.41256	0.0158407	0.0409036
LIT_MM_TOMCZAK_MYOGENIC_2D_C2_DIFF	CHST11	81.4253	-1.50646	0.305892	-4.92482	8.444e-07	1.68287e-05
LIT_MM_CLODFELTER_129J×BLACK-SWISS_129J×BALBC_ICR_M-F-1.5FD_SEX-SPECIFIC_DIFF	NLGN3	3.16346	-1.50623	0.588732	-2.55843	0.0105145	0.0292607
LIT_MM_DESCHÊNES_WRNDHEL_DHEL-PRIMARY_DN	HMGA2-PS1	209.255	-1.50483	0.530267	-2.83787	0.00454158	0.0147727
LIT_MM_DIVINA_TOTAL-TESTIS-SOMATIC-CELL_PEM-1-2PEMTT_MAPPED_DIFF	MAP3K13	30.8012	-1.50188	0.417794	-3.59478	0.000324671	0.00180208
LIT_MM_MIJALSKI_16DUAL-COLOR_HYBRIDIZATIONS_LIVER_UP	PROX1	8.5076	-1.49745	0.395203	-3.78906	0.00015122	0.000992755
LIT_MM_CAHOY_ASTROCYTE-SPECIFIC_UP	CCDC8	16.4983	-1.49547	0.26166	-5.71534	1.09487e-08	5.51289e-07
LIT_MM_DONZE_PKR_DN	HSPG2	4547.37	-1.49165	0.241427	-6.17848	6.47205e-10	5.85019e-08
LIT_MM_TOMCZAK_MYOGENIC_2D_C2_DIFF	HGF	3.43927	-1.48779	0.579189	-2.56875	0.0102066	0.0285661
LIT_MM_DIVINA_TOTAL-TESTIS_PEM-1-2PEMTT_MAPPED_DIFF	PTPN4	246.699	-1.48622	0.30908	-4.80854	1.52036e-06	2.71095e-05
LIT_MM_LUKAS_MOUSE-SPINAL-CORD_DIFF	ITGA2	3.8567	-1.48537	0.541313	-2.74402	0.00606925	0.0187403
LIT_MM_REZEN_LIVER_PHENOBARBITAL_DN	GIPC3	9.73208	-1.47636	0.563118	-2.62176	0.00874765	0.0251624
LIT_MM_SHETH_PAM6_TUMOR_LIVER_TXNIP-DEFICIENT_DIFF	RTN4R	3.26017	-1.47615	0.533934	-2.76466	0.00569818	0.0178039
LIT_MM_FANG_LACRIMAL-GLAND_CORNEAL-TRAUMA-ONCE_DIFF	NPAS2	20.0442	-1.47565	0.395995	-3.72643	0.000194209	0.00120221
LIT_MM_ZHU_LPS_IFN-2_MA_PGE2_ISO_DIFF	SEMA5A	81.8288	-1.47413	0.186772	-7.89266	2.95807e-15	1.4941e-12
LIT_MM_LOH_ESCELL_JMJD2C-KO_DN	PCDHGB1	5.60867	-1.47146	0.447703	-3.28669	0.00101374	0.00444883
LIT_MM_TOMCZAK_MYOGENIC_2D_C3_DIFF	NPNT	148.309	-1.46962	0.349969	-4.1993	2.67743e-05	0.000250435
LIT_MM_MUTCH_INTESTINAL-TRACT_DIFF	ABCA9	245.493	-1.46586	0.252296	-5.81008	6.24415e-09	3.52882e-07
LIT_MM_FEI_SMAD4-TARGET-GENE_DIFF	ODF3L2	150.241	-1.46156	0.599115	-2.43953	0.0147062	0.0384561
LIT_MM_HAMATANI_YOUNG_VS_AGED-OOCYTE_UP	MME	66.5917	-1.46113	0.206161	-7.08731	1.36744e-12	3.45343e-10
LIT_MM_SHEN_ESCELL_H3K27ME3-TARGET_BFEZH1-TARGET_DIFF	ASB18	208.943	-1.46004	0.393258	-3.71268	0.000205074	0.00125316
LIT_MM_ESAU_LIVER_4W_ALINE_VS_MIR-122-ASO-2W_DN	RALGPS1	33.0709	-1.45454	0.374915	-3.87966	0.000104603	0.000742839
LIT_MM_TURK_HINDLIMB-MUSCLE_DYSTROPHIN-DEFICIENT_DIFF	PCSK6	282.87	-1.45049	0.147349	-9.8439	7.28323e-23	2.35438e-19
LIT_MM_HOFFMANN_T-CELL_LYMPHOCYTE_C12_DIFF	WDFY2	64.6209	-1.44961	0.362952	-3.99393	6.49864e-05	0.00050841
LIT_MM_HOFFMANN_PRE-BI-CELL_UP	TIAM1	153.255	-1.44876	0.303615	-4.77168	1.82691e-06	3.13465e-05
LIT_MM_BUNGER_1138_WY14643_DIFF	CHRNA2	12.8297	-1.44647	0.534792	-2.70473	0.00683598	0.020541
LIT_MM_AIBA_ESCELL_PRIMITIVE-ECTODERM_NEURAL-LINEAGE_DIFF	4931431C16RIK	2.98722	-1.44469	0.616864	-2.34199	0.0191812	0.047623
L2L_MM_HSC_LATEPROGENITORS_ADULT	LASS6	12.1347	-1.44101	0.452632	-3.18362	0.00145446	0.00594248
LIT_MM_CHEN_TE14.5C_VS_E14.5M_NEPHRON_UP	BTBD7	256.33	-1.44059	0.340331	-4.23292	2.3068e-05	0.000221669
LIT_MM_ZHU_LPS_IFN-2_MA_PGE2_ISO_DIFF	MYO7B	5.86641	-1.43847	0.413296	-3.48049	0.000500505	0.00253913
LIT_MM_LIN_Foxp3EGFP-plus_Foxp3EGFP-plus_DN	CACNA2D4	314.072	-1.43511	0.219944	-6.5249	6.80467e-11	9.73309e-09
LIT_MM_SUSZTAK_STZ-TREATED_C57BL6-MICE_DIFF	PTCH1	131.973	-1.43155	0.530505	-2.69846	0.00696617	0.0208546
LIT_MM_TSENG_16-W-MDX_GASTROCNEMIUS-MUSCLE_UP	COL6A3	1120.18	-1.43106	0.306363	-4.67112	2.99555e-06	4.59365e-05
LIT_MM_MIROTSOU_MI-LV_TAC-LV_TAC-SEPTUM_UP	COL5A1	733.853	-1.42854	0.311162	-4.59099	4.41149e-06	6.24863e-05
LIT_MM_MORTON_SELF-ORGANISING-MAP_DIFF	COCH	16.427	-1.42462	0.282334	-5.04587	4.51452e-07	1.02917e-05
LIT_MM_COVENEY_XY-WNT4_XX-WNT4-GONAD_VS_XX-WNT4_UP	LY6G6E	11.9183	-1.42281	0.401693	-3.54203	0.00039706	0.00210969
LIT_MM_HOFFMANN_T-CELL_LYMPHOCYTE_C1_DIFF	GPR133	109.86	-1.42186	0.21661	-6.56414	5.23355e-11	7.8324e-09
LIT_MM_ZENG_MATERNAL_PREIMPLANTATION_DIFF	ABHD2	51.4877	-1.41488	0.477908	-2.96057	0.00307075	0.0107897
LIT_MM_ZHU_LBP_LP_DIFF	RASSF8	189.17	-1.41437	0.383252	-3.69043	0.000223873	0.00134834
LIT_MM_TOMCZAK_MYOGENIC_2D_C4_DIFF	TTLL4	170.278	-1.41399	0.314945	-4.48964	7.13439e-06	8.98078e-05
LIT_MM_PORTER_MEOM_MLM-MYOBLAST_DIFF	FAM167A	13.3407	-1.40983	0.379335	-3.71657	0.000201943	0.00123918
LIT_MM_TABIBIAZAR_VASCULAR-WALL_VASCULAR_C57_UP	PKHD1L1	8.08625	-1.4084	0.390479	-3.60685	0.000309939	0.00173761
LIT_MM_TURK_HINDLIMB-MUSCLE_DYSTROPHIN-DEFICIENT_DIFF	EBF2	65.7615	-1.407	0.217211	-6.47759	9.31987e-11	1.21794e-08
LIT_MM_HAMATANI_DORMANT_ACTIVATED-BLASTOCYST_DIFF	ZDHHC23	26.2364	-1.40668	0.508004	-2.76904	0.00562222	0.017604
LIT_MM_WU_ES_VS_ES-TF-CELL_UP	PRDM10	39.4533	-1.4049	0.431	-3.25963	0.00111558	0.0048083
LIT_MM_HUBER_LYMPHOTOXIN-BETA_LYMPH-NODE_FOLLICULAR-DENDRITIC-CELL_UP	LEPREL1	25.0285	-1.40317	0.383353	-3.66025	0.000251965	0.00148199
LIT_MM_BEGLOPOULOS_CEREBRAL-CORTEX_PRESENILIN_UP	VPS13C	910.57	-1.40004	0.452007	-3.09739	0.00195235	0.00751569
LIT_MM_EDWARDS_CD4_VS_CD8ALPHA_UP	LYST	90.9591	-1.39634	0.37088	-3.76494	0.000166589	0.00106976
LIT_MM_HUTTMANN_LT-HSC_UP	GBGT1	5.64403	-1.39355	0.467125	-2.98326	0.002852	0.0101438
LIT_MM_HODGES_R6-1_BRAIN_HUNTINGTON_INITIAL-EXPLORATION-4H_DIFF	NETO2	170.913	-1.388	0.231191	-6.00372	1.9285e-09	1.41042e-07
LIT_MM_TOMCZAK_MYOGENIC_2D_C4_DIFF	SPRED2	116.134	-1.38713	0.394967	-3.51202	0.000444708	0.00230971
LIT_MM_STEVENSON_MYOTUBE-STARVATION_ATROPHY_FUNCTION_DN	ADAMTS4	12.3113	-1.38711	0.45588	-3.04272	0.00234454	0.00864387
LIT_MM_RENTHAL_SALINE-HDAC5KO_SALINE_DN	MRGPRB1	11.3645	-1.38567	0.396449	-3.49521	0.000473689	0.00242978
LIT_MM_TVRDIK_R4-E10.5_HOXB1A1_VS_A1-EMBRYO_DN	FAT4	177.202	-1.38248	0.213386	-6.47879	9.24604e-11	1.21794e-08
LIT_MM_PEMOV_NF1_CORIELL-18_DIFF	GM17296	202.188	-1.38058	0.371948	-3.71175	0.00020583	0.00125588
LIT_MM_BUCHSTALLER_C5_E16_E18_P0_UP	AI506816	26.5027	-1.3803	0.45175	-3.05544	0.0022473	0.00835398
LIT_MM_BATTLE_HNF4ALPHA-NULL-EMBRYONIC_LIVER_DN	PGGT1B	188.562	-1.37962	0.307502	-4.48654	7.23884e-06	9.07691e-05
LIT_MM_ZENG_MATERNAL-ZYGOTIC_PREIMPLANTATION_DIFF	TBCK	117.669	-1.37859	0.386303	-3.56868	0.000358791	0.00194864
LIT_MM_ZAKIN_OTX22Y2_GASTRULATING-EMBRYO_UP	ANKRD52	1497.86	-1.37818	0.366004	-3.76546	0.00016624	0.00106879
LIT_MM_FRIES_STRAIN_AGE-X-STRAIN_FUNCTIONAL-CLUSTER_DN	SLC6A2	13.1931	-1.37206	0.330763	-4.14818	3.35135e-05	0.000297953
LIT_MM_LINDSLEY_D3_DKK-PLUS_VS_DKK_DN	SNED1	73.0704	-1.37068	0.382639	-3.58218	0.000340745	0.00187074
LIT_MM_DIVINA_GERMINAL-CELL_DN	FHL5	15.0725	-1.36767	0.372918	-3.66749	0.000244946	0.00144862
LIT_MM_REDDY_GLUCOCORTICOID_CIRCADIAN_LIVER_DIFF	ARNTL	379.464	-1.36669	0.290684	-4.70165	2.58071e-06	4.07742e-05
LIT_MM_IVANOVA_SOX2-SHRNA-TIME-COURSE-ONLY_UP	ARSI	24.8882	-1.36605	0.292778	-4.66583	3.07377e-06	4.68251e-05
LIT_MM_SPACH_CNS_1-25-OH-2D3_UP	COL4A4	34.0225	-1.36543	0.19909	-6.85839	6.96417e-12	1.32426e-09
LIT_MM_SHETH_PAM5_TUMOR_LIVER_TXNIP-DEFICIENT_DIFF	PI15	22.6877	-1.36445	0.390142	-3.49732	0.000469961	0.00241526
LIT_MM_SUSZTAK_MESANGIAL-MATRIX_VS_MINIMALMESANGIAL_DIFF	AUTS2	359.604	-1.36441	0.240614	-5.67051	1.42369e-08	6.63145e-07
LIT_MM_HOFFMANN_T-CELL_LYMPHOCYTE_C16_DIFF	FAM46C	17.1226	-1.36432	0.331664	-4.11357	3.89591e-05	0.000335443
LIT_MM_MILLIEN_T1-ALPHA_LUNG_E18.5_DN	BMP5	134.27	-1.36392	0.24676	-5.52734	3.25128e-08	1.30723e-06
LIT_MM_PONDER_HIGH_VS_LOW-HIPPOCAMPAL-AMPLE_QPCR_DIFF	TRPM3	15.5988	-1.36327	0.28395	-4.80108	1.57809e-06	2.78762e-05
LIT_MM_BEVERDAM_11.5DPC-MALE-SOMATIC-CELL_UP	SSH1	82.3028	-1.35834	0.275555	-4.92948	8.24508e-07	1.64728e-05
LIT_MM_ALLEN_14.5_PLACENTAE_UP	4833403I15RIK	44.5465	-1.35216	0.346982	-3.89691	9.74273e-05	0.000702999
LIT_MM_SYMULA_CDK4_VS_ES-CELL-LINE_DIFF	EIF4EBP2	1615.26	-1.34905	0.450443	-2.99494	0.00274497	0.00983963
LIT_MM_SCHIEKOFER_ACUTE-2W_TRANSGENE-REPRESSION-2D_DN	TRIP11	473.914	-1.34488	0.249178	-5.39725	6.76719e-08	2.32225e-06
LIT_MM_ZENG_MATERNAL_PREIMPLANTATION_DIFF	DBNDD1	40.4969	-1.34414	0.414787	-3.24057	0.00119292	0.00505537
LIT_MM_MAJUMDER_RAPAMYCIN-INHIBITOR_DIFF	UHMK1	96.1891	-1.34332	0.38053	-3.53013	0.000415359	0.00218536
LIT_MM_POTTER_MUTANT-RENAL-VESICLE_LIM1_UP	GAN	25.7818	-1.34314	0.301805	-4.45037	8.57211e-06	0.000103784
LIT_MM_PORTER_MEOM_MLM-MYOBLAST_MYOTUBE_DIFF	CIT	15.4051	-1.34264	0.340481	-3.94336	8.0349e-05	0.000602357
LIT_MM_CHALLEN_GFP-VE-URETERIC-TREE_VS_GFP-VE-CELL-POPULATION_DN	NTS	23.8564	-1.34256	0.524901	-2.55774	0.0105355	0.0292989
LIT_MM_ESAU_LIVER_4W_ALINE_VS_MIR-122-ASO-2W_DN	NPHP4	6.61196	-1.34238	0.421508	-3.18471	0.00144899	0.00592464
LIT_MM_HOFFMANN_T-CELL_LYMPHOCYTE_C2_DIFF	USP9X	2205.53	-1.3405	0.483694	-2.77137	0.00558203	0.0174985
LIT_MM_DIVINA_TOTAL-TESTIS_PEM-1-2PEMTT_NON-MAPPED_DIFF	FGF6	35	-1.33294	0.297337	-4.48292	7.36275e-06	9.17534e-05
LIT_MM_CRAWFORD_E18.5_PANCREATIC-ISLET_UP	ZYG11A	15.4797	-1.3292	0.268334	-4.95354	7.28759e-07	1.50626e-05
LIT_MM_LI_CO2_NEONATAL_LUNG_DN	ADRA1A	27.5035	-1.3291	0.26139	-5.08475	3.68109e-07	8.89349e-06
LIT_MM_RIVOLTA_COCHLEAR_HAIR_DAY4_UP	COL6A2	1077.79	-1.32839	0.299064	-4.44183	8.9196e-06	0.000106791
LIT_MM_WILDE_HF-FEEDING_3D_DN	KCNG4	1341.26	-1.32708	0.14666	-9.04869	1.44698e-19	2.33876e-16
LIT_MM_ESAU_LIVER_4W_ALINE_VS_MIR-122-ASO-2W_DN	LMBRD2	162.781	-1.32647	0.56709	-2.33909	0.0193309	0.047899
LIT_MM_DECRAENE_FGF6_SP-MP_MYOGENIC-C2C12_UP	RET	85.8934	-1.32138	0.193505	-6.82863	8.57309e-12	1.57462e-09
LIT_MM_PAN_ABSENT_VS_PRESENT_5FOLD_PRIMORDIAL_VS_PRIMARY-STAGE_UP	ZHX3	181.557	-1.31497	0.274126	-4.79696	1.61092e-06	2.82401e-05
LIT_MM_XIAO_16X-LINKED_BRCA1-P53-MAMMARY-GLAND_UP	4930578C19RIK	39.99	-1.31164	0.349647	-3.75134	0.000175892	0.00111839
LIT_MM_MCCABE_WTPRE_VS_RB-PRE-CELL_SERUM_DN	HAS2	13.1689	-1.31145	0.375823	-3.48955	0.000483827	0.0024708
LIT_MM_SHAROVA_CORRELATED-NEGATIVELY-PC1_DIFF	VPS13D	1607.14	-1.31143	0.329329	-3.98211	6.83057e-05	0.000530017
LIT_MM_ESAU_LIVER_4W_ALINE_VS_MIR-122-ASO-2W_UP	EVI5L	142.293	-1.3111	0.388328	-3.37627	0.000734759	0.00342937
LIT_MM_HOFFMANN_B-CELL_LYMPHOCYTE_C19_DIFF	ITPKB	555.962	-1.3074	0.444999	-2.938	0.00330341	0.0114479
LIT_MM_YAO_6HP4_VS_KO_SAM_UP	COL15A1	636.36	-1.3074	0.348707	-3.74928	0.000177346	0.00112586
LIT_MM_SHEN_ESCELL_H3K27ME3-TARGET_BFEZH1-TARGET_DIFF	MMP28	35.9061	-1.30649	0.283793	-4.60367	4.15118e-06	5.97467e-05
LIT_MM_DIVINA_TOTAL-TESTIS-SOMATIC-CELL_PEM-1-2PEMTT_MAPPED_DIFF	TMEM229A	7.77773	-1.30432	0.356787	-3.65575	0.000256434	0.00150117
LIT_MM_YAO_6HP4_VS_KO_SAM_UP	FN1	1510.78	-1.29812	0.361838	-3.58757	0.00033378	0.00184189
LIT_MM_ZENG_1-CELL-TRANSIENT_PREIMPLANTATION_DIFF	GATAD2B	237.663	-1.29664	0.347273	-3.73377	0.000188635	0.00117855
LIT_MM_TVRDIK_R4-E10.5_HOXB1A1_VS_A1-EMBRYO_UP	ADAMTS3	14.3825	-1.29654	0.275056	-4.71374	2.43209e-06	3.89592e-05
LIT_MM_CHEN_E14.5C_VS_E18.5C_KIDNEY_UP	MBD5	313.447	-1.29544	0.281489	-4.60209	4.18282e-06	6.01485e-05
LIT_MM_HOFFMANN_T-CELL_LYMPHOCYTE_C9_DIFF	DENND4C	704.389	-1.29161	0.296994	-4.34896	1.36787e-05	0.000148482
LIT_MM_LIADAKI_SIDE-POPULATION_MUSCLE_VS_BONE-MARROW_UP	CACNA1C	59.3717	-1.29007	0.27152	-4.75128	2.02136e-06	3.37513e-05
LIT_MM_RENTHAL_COCAINE-HDAC5KO_COCAINE_DN	SLC24A5	5.60108	-1.28932	0.481702	-2.67659	0.00743766	0.0220461
LIT_MM_SILVA-VARGAS_4-HYDROXYTAMOXIFEN_K14-BETAN-CATENINER_UP	HAS3	63.0692	-1.28824	0.290956	-4.42762	9.52783e-06	0.000111991
LIT_MM_SHIMA_TESTIS_SPERMATOGENESIS_MURINE_DIFF	COL4A2	2375.93	-1.28698	0.251133	-5.1247	2.9801e-07	7.52616e-06
LIT_MM_POTIREDDY_MMRNA_LATE-1-CELL-EMBRYOS_UP	ZFP109	32.7784	-1.28543	0.445985	-2.88223	0.00394873	0.0132304
LIT_MM_VAN-ERP_GROUP-D_C57BL_VS_6BMDM_VS_YERSINIA-INFECTION_DIFF	CYB5D1	98.0184	-1.28507	0.521278	-2.46522	0.0136928	0.0362577
LIT_MM_XU-CNS_CALORIC-RESTRICT_24M_DIFF	FBXL18	91.2939	-1.28307	0.375995	-3.41247	0.000643773	0.00308305
LIT_MM_SUZUKI_ESTRADIOL_LACRIMAL-GLAND_DN	DNMBP	310.589	-1.28083	0.458817	-2.79159	0.00524492	0.0165995
LIT_MM_TOMCZAK_MYOGENIC_2D_C4_DIFF	DYRK2	686.345	-1.28071	0.225547	-5.67823	1.36096e-08	6.48887e-07
LIT_MM_SPACH_CNS_EAE_DN	REL	45.2245	-1.28042	0.238695	-5.36426	8.12808e-08	2.70874e-06
LIT_MM_WELLS_LPS-INDUCIBLE_BALB-C_C3H-ARC_NOT-C3H-HEJ-STRAIN_DIFF	KDR	1209.98	-1.27986	0.198934	-6.43357	1.24638e-10	1.54964e-08
LIT_MM_MCMULLEN_INSULIN_CARDIAC-MYOCYTE_DIFF	SLC25A36	374.694	-1.27844	0.224945	-5.68336	1.32076e-08	6.33454e-07
LIT_MM_DIVINA_TOTAL-TESTIS_PEM-1-2PEMTT_MAPPED_DIFF	FGF14	8.61843	-1.27662	0.423266	-3.01612	0.00256031	0.00929729
LIT_MM_RIVOLTA_COCHLEAR_HAIR_DAY2_UP	COL6A1	1248.69	-1.27638	0.25953	-4.91804	8.74163e-07	1.73576e-05
LIT_MM_ZHU_LPS_IFN-2_MA_PGE2_ISO_DIFF	LAMC3	20.4007	-1.27495	0.26299	-4.8479	1.24774e-06	2.32545e-05
LIT_MM_TOMCZAK_MYOGENIC_2D_C3_DIFF	CCDC88C	815.247	-1.2748	0.30771	-4.14287	3.42987e-05	0.000303931
LIT_MM_TOMCZAK_MYOGENIC_2D_C4_DIFF	PKD1	785.204	-1.27334	0.325182	-3.91579	9.01089e-05	0.000658422
LIT_MM_CHALLEN_GFP-VE-URETERIC-TREE_VS_GFP-VE-CELL-POPULATION_DN	PCDH12	136.117	-1.27333	0.262843	-4.84447	1.26949e-06	2.34768e-05
LIT_MM_KRUTZFELDT_LIVERS_ANTAGOMIR-122-TREATED_VS_MM-ANTAGOMIR-122_UP	MRS2	420.633	-1.27298	0.250059	-5.09071	3.56718e-07	8.65709e-06
LIT_MM_WELLS_MACROPHAGE_RIKEN-CLONE_FANTOM_DIFF	MOB1A	103.548	-1.27292	0.398658	-3.19302	0.00140792	0.00578835
LIT_MM_ZENG_1-CELL-TRANSIENT_PREIMPLANTATION_DIFF	FAT3	77.3665	-1.269	0.348377	-3.64261	0.000269883	0.00155836
LIT_MM_ZENG_MATERNAL_PREIMPLANTATION_DIFF	GM5113	163.66	-1.26838	0.356525	-3.55763	0.000374221	0.0020155
LIT_MM_PASINI_SUZ12-BOUND-PROMOTERS-IN-ES-CELL-ESPRESSING-SCR-SHRNAS_DIFF	CCDC85C	576.984	-1.26719	0.443297	-2.85856	0.00425563	0.0140289
LIT_MM_DIVINA_TOTAL-TESTIS_PEM-1-2PEMTT_MAPPED_DIFF	CAMK4	4.59459	-1.26455	0.512668	-2.4666	0.0136401	0.0361299
LIT_MM_RECINOS_LIVER_DIETARY-FAT_LDLR-PLUS_VS_PLUS-HF-LF_DN	GPLD1	537.788	-1.25942	0.332524	-3.78746	0.000152195	0.000998752
LIT_MM_TURK_HINDLIMB-MUSCLE_DYSTROPHIN-DEFICIENT_DIFF	HR	1872.1	-1.25754	0.212749	-5.91091	3.40229e-09	2.15652e-07
LIT_MM_REY_LIVER_BMAL1-SITE_DIFF	GM10549	6.8218	-1.25495	0.406922	-3.08401	0.00204233	0.00777624
LIT_MM_HUBER_LYMPHOTOXIN-BETA_LYMPH-NODE_FOLLICULAR-DENDRITIC-CELL_UP	CREB3L2	195.435	-1.25401	0.34493	-3.63555	0.000277388	0.0015903
LIT_MM_ZENG_MATERNAL-ZYGOTIC_PREIMPLANTATION_DIFF	KIF13B	172.63	-1.25261	0.52267	-2.39656	0.01655	0.0422939
LIT_MM_KELLY_SPINAL-CORD_CORTICAL_UP	FAM5B	8.45643	-1.25155	0.372535	-3.35955	0.000780684	0.00360211
LIT_MM_SHAROVA_LIF_MC1-CELL_DN	UPRT	38.1916	-1.24972	0.500468	-2.4971	0.0125215	0.0337028
LIT_MM_LIADAKI_MUSCLE_SIDE-POPULATION_VS_MAIN-POPULATION_UP	USP34	1387.07	-1.24969	0.282495	-4.42375	9.70001e-06	0.000113363
LIT_MM_MASSARO_CALORIE_VS_AD-LIBITUM_24H_UP	ACE	881.168	-1.24814	0.18093	-6.89848	5.25615e-12	1.06004e-09
LIT_MM_ZHU_LBP_LP_DIFF	PIK3AP1	13.8837	-1.24777	0.39714	-3.14188	0.00167864	0.00666468
LIT_MM_KAJIMURA_KLF7_OE_DIFF	FLRT1	84.2252	-1.24248	0.280436	-4.43052	9.4004e-06	0.000110944
LIT_MM_FORSBERG_LT-HSC_VS_MPP_UP	PDZD2	629.818	-1.2404	0.222052	-5.5861	2.3222e-08	1.0009e-06
LIT_MM_DONZE_PKR_UP	FOXO3	195.97	-1.24028	0.521865	-2.37664	0.0174711	0.044153
LIT_MM_RUSH_AORTA_AAA-GROUP_NOAAA-GROUP_DN	FBXO40	3225.04	-1.2397	0.49658	-2.49648	0.0125432	0.0337557
LIT_MM_MAHERALI_2D4IPS-CELL_ES_MEF_DIFF	RAVER2	207.847	-1.23875	0.20678	-5.99067	2.0898e-09	1.49458e-07
LIT_MM_VAN-ERP_GROUP-D_C57BL_VS_6BMDM_VS_YERSINIA-INFECTION_DIFF	E330009J07RIK	4.70177	-1.23701	0.462144	-2.67667	0.00743577	0.0220461
LIT_MM_MCINTYRE_EMX2_VS_EMX2_DN	GM4861	36.8704	-1.23625	0.479038	-2.5807	0.00986011	0.0277791
LIT_MM_PISITKUN_B6-YAA_VS_B6-FOLLICULAR-B-CELL_UP	9130019P16RIK	15.4049	-1.2352	0.417424	-2.95909	0.00308547	0.0108226
LIT_MM_MIROTSOU_MI-LV_TAC-LV_TAC-SEPTUM_UP	COL4A1	3014.39	-1.23453	0.257131	-4.80119	1.57729e-06	2.78762e-05
LIT_MM_SPACH_CNS_EAE_UP	SMAD3	2807.21	-1.23391	0.21958	-5.61941	1.91615e-08	8.55544e-07
LIT_MM_EDWARDS_CD4_VS_CD8ALPHA_UP	MMP9	32.3666	-1.23324	0.414391	-2.97603	0.00292007	0.0103434
LIT_MM_JOSHI_NEWBORN_FIGLA_UP	PCDHGC3	145.255	-1.23271	0.489972	-2.51587	0.0118739	0.0322525
LIT_MM_LANG_SOCS3_VS_MACROPHAGES_100TREATMENT_IL-6_UP	VCAN	105.173	-1.2315	0.285943	-4.3068	1.65634e-05	0.000171942
LIT_MM_HOFFMANN_B-CELL_LYMPHOCYTE_C10_DIFF	C1GALT1	212.555	-1.22958	0.346044	-3.55324	0.000380518	0.00204126
LIT_MM_MITCHELL_P38_HEART_DN	MRGPRH	64.6876	-1.22849	0.209538	-5.86286	4.54954e-09	2.72349e-07
LIT_MM_FORSBERG_LT-HSC_VS_MPP_UP	ANGPTL1	98.0525	-1.22796	0.265482	-4.62538	3.73911e-06	5.4754e-05
LIT_MM_MISHRA_DB-DB_VS_DB-M_KIDNEYS_DIFF	EDN3	13.0762	-1.22742	0.339991	-3.61016	0.000306007	0.00171915
LIT_MM_MIROTSOU_MI-LV_TAC-LV_TAC-SEPTUM_UP	COL1A2	4344.83	-1.22587	0.518418	-2.36464	0.0180476	0.0453448
LIT_MM_HAMATANI_DORMANT_ACTIVATED-BLASTOCYST_DIFF	TRIM14	11.9267	-1.22585	0.334228	-3.66772	0.000244725	0.00144784
LIT_MM_CLERCH_DEX_VS_DIL_UP	RGS5	2288.57	-1.2255	0.350885	-3.4926	0.000478349	0.00244824
LIT_MM_PORTER_DIAPHRAGM_VS_HINDLIMB-MUSCLE_DIFF	GNA12	411.299	-1.22157	0.269304	-4.53601	5.73277e-06	7.59499e-05
LIT_MM_SAGI_PROTEOMIC-RASAGILINE_MIDBRAIN_UP	SHC3	4.141	-1.21931	0.516391	-2.36121	0.0182155	0.0456672
LIT_MM_TOMCZAK_MYOGENIC_2D_C2_DIFF	NCOR2	2914.25	-1.21925	0.193912	-6.28766	3.22297e-10	3.30453e-08
LIT_MM_HAMATANI_DORMANT_ACTIVATED-BLASTOCYST_DIFF	NHLRC3	32.5987	-1.21898	0.314962	-3.87026	0.000108721	0.000767695
LIT_MM_LAFFAIRE_TS1CJE_EUPLOID_CEREBELLUM_P3_UP	B230119M05RIK	6.88177	-1.21629	0.517419	-2.35069	0.0187388	0.0467255
LIT_MM_HUBER_LYMPHOTOXIN-BETA_LYMPH-NODE_FOLLICULAR-DENDRITIC-CELL_UP	ITGA1	263.541	-1.21499	0.224315	-5.41647	6.07882e-08	2.16593e-06
LIT_MM_MITCHELL_RAS_HEART_UP	FREM1	16.4484	-1.21371	0.278056	-4.36498	1.27137e-05	0.00013979
LIT_MM_MITCHELL_P38_HEART_UP	TTLL7	4454.66	-1.21265	0.321857	-3.76766	0.000164784	0.00106196
LIT_MM_TOMCZAK_MYOGENIC_2D_C4_DIFF	SGCD	376.233	-1.2118	0.245199	-4.94213	7.72734e-07	1.57232e-05
LIT_MM_CUI_TA_E16.5BS_UP	PDZD7	198.661	-1.21177	0.186614	-6.49346	8.38851e-11	1.13936e-08
LIT_MM_LEE_SUBCLASSA_A_VS_B_HUMAN-CANCER_UP	PDE4A	1513	-1.21079	0.143883	-8.41511	3.92543e-17	3.3393e-14
LIT_MM_LANG_SOCS3_VS_MACROPHAGES_400TREATMENT_IL-6_UP	FNDC1	557.481	-1.20927	0.244021	-4.9556	7.21058e-07	1.498e-05
LIT_MM_CHEN_E14.5C_VS_E18.5C_KIDNEY_UP	NBEAL1	405.723	-1.20831	0.305947	-3.94942	7.834e-05	0.000590032
LIT_MM_YAO_29M-BDF1-MICE_TESTIS_DN	PHC1	478.586	-1.20802	0.206713	-5.84394	5.0981e-09	3.01103e-07
LIT_MM_EDWARDS_CD4_VS_CD8ALPHA_UP	INPP5J	105.446	-1.20655	0.239074	-5.04675	4.4939e-07	1.02592e-05
LIT_MM_FANG_LACRIMAL-GLAND_CORNEAL-TRAUMA-ONCE_DIFF	ERN1	176.6	-1.20629	0.516113	-2.33726	0.0194256	0.0480894
LIT_MM_WONG_CIITA_PLEXIN-A1_T_DENDRITIC-CELL_UP	PLXNA1	530.955	-1.20539	0.254213	-4.74163	2.12003e-06	3.4963e-05
LIT_MM_MIROTSOU_MI-LV_TAC-LV_TAC-SEPTUM_UP	NID1	1226.38	-1.2043	0.217151	-5.54593	2.92402e-08	1.19648e-06
LIT_MM_DONZE_PKR_UP	STRN	121.626	-1.2008	0.388259	-3.09279	0.00198286	0.00760118
LIT_MM_ZENG_MATERNAL_PREIMPLANTATION_DIFF	ARHGEF11	515.003	-1.20001	0.365531	-3.28293	0.00102736	0.00449638
LIT_MM_HALDAR_SYT-SSX_UP	C130021I20RIK	5.42298	-1.19999	0.476711	-2.51723	0.0118282	0.0321526
LIT_MM_TURK_INBRED-STRAIN_DIFF	TEAD4	184.721	-1.19811	0.395411	-3.03004	0.00244522	0.00893762
LIT_MM_TOMCZAK_MYOGENIC_2D_C3_DIFF	ADAMTSL3	85.3775	-1.19694	0.18722	-6.39324	1.62411e-10	1.87504e-08
LIT_MM_ZENG_2-CELL-TRANSIENT_PREIMPLANTATION_DIFF	RCOR1	119.339	-1.19362	0.3594	-3.32114	0.000896517	0.00402064
LIT_MM_CHEN_TE18.5C_VS_E14.5C_KIDNEY_UP	2410066E13RIK	58.4265	-1.193	0.301485	-3.95708	7.58726e-05	0.000573855
LIT_MM_NISHIYAMA_TF-ESX1_ES-CELL_UP	C130083M11RIK	62.4509	-1.19275	0.368429	-3.2374	0.00120624	0.0050971
LIT_MM_RECINOS_LIVER_GENOTYPE_LDLR-MINUS-LF_VS_LDLR-PLUS-LF_DN	DAG1	3558.2	-1.1922	0.419095	-2.8447	0.00444537	0.014527
LIT_MM_STARK_DF16A_PFC_UP	GM996	4.60483	-1.18911	0.486591	-2.44375	0.0145355	0.0380774
LIT_MM_HOUSE_EPIDIDYMAL-ADIPOSE_14D_METABOLISM_DIFF	MOGAT2	4.61126	-1.18904	0.480562	-2.47426	0.0133513	0.035522
LIT_MM_PORTER_MEOM_MLM-MYOBLAST_DIFF	KCNQ4	365.642	-1.187	0.468747	-2.53227	0.0113326	0.0310666
LIT_MM_ZHOU_BCL6-BINDING_CIS_CEREBELLUM_DN	FAT1	101.939	-1.18672	0.234708	-5.05614	4.27834e-07	9.907e-06
LIT_MM_MACKIEWICZ_C4_CEREBRAL-CORTEX_WAKE_UP	VWA3A	24.1227	-1.18408	0.270252	-4.3814	1.17921e-05	0.000132227
LIT_MM_ZHU_LBP_LP_DIFF	SIGLEC1	24.9863	-1.18192	0.300038	-3.93924	8.17392e-05	0.000610432
LIT_MM_SCHULZ_UPDP-CHRS7-11-PROXIMAL_T65H-BREAKPOINT_DIFF	ZFP551	18.2904	-1.18149	0.405853	-2.91114	0.00360116	0.0122719
LIT_MM_SUSZTAK_HYPERGLYCEMIC_VS_ALBUMINURIC-MICE_DIFF	GYS2	13.5955	-1.176	0.406585	-2.89238	0.0038233	0.0128849
LIT_MM_KITAMURA_TOTAL-CELLULAR-FRACTION_LPS-TREATMENT_DN	EP300	1386.81	-1.17563	0.192796	-6.09778	1.07551e-09	8.81816e-08
LIT_MM_SHI_HIF1ALPHA_TH17-CELL_DN	GM2011	4.34084	-1.17551	0.487732	-2.41015	0.015946	0.0411259
LIT_MM_XU-CNS_24M_M_HIPPO_CALORIC-RESTRICT_AAGS-REVERTED_DN	ZFP609	587.663	-1.17495	0.205981	-5.70415	1.16924e-08	5.8135e-07
LIT_MM_WU_ES_VS_ES-TF-CELL_UP	PDS5A	603.687	-1.1729	0.319177	-3.67477	0.000238063	0.00141881
LIT_MM_ZENG_1-CELL-TRANSIENT_PREIMPLANTATION_DIFF	PALLD	699.724	-1.1726	0.281029	-4.17252	3.01248e-05	0.000273543
LIT_MM_HOFFMANN_PRE-BI_VS_LARGE-PRE-BII-CELL_DIFF	NPC1	1840.59	-1.17124	0.27938	-4.1923	2.76146e-05	0.000255696
LIT_MM_LEE_HUNTINGTIN_POLYGLUTAMINE-TRACT_STRIATAL-CELL_UP	ARSJ	5.72047	-1.17122	0.453525	-2.58247	0.00980957	0.0276657
LIT_MM_FORSBERG_ST-HSC_VS_LT-HSC_UP	SNX29	67.7224	-1.16738	0.297218	-3.9277	8.57633e-05	0.000633543
LIT_MM_NISHIYAMA_TF-CDX2_ES-CELL_DN	5730405O15RIK	8.78413	-1.16579	0.403934	-2.88609	0.00390066	0.0130992
LIT_MM_ROSSI_AGE_LT-HSC_UP	ZBTB38	641.583	-1.16479	0.244149	-4.7708	1.83496e-06	3.14512e-05
LIT_MM_BUCHSTALLER_C1_E9.5_UP	DNMT3A	1576.32	-1.16314	0.13318	-8.7336	2.46697e-18	2.65824e-15
LIT_MM_POTIREDDY_MMRNA_LATE-1-CELL-EMBRYOS_UP	CMKLR1	102.877	-1.16301	0.249576	-4.65994	3.16303e-06	4.79588e-05
LIT_MM_PAN_2FOLD-LOWER_OOCYTE-ANTRAL-STAGE_C12D_VS_UNPRIMED_UP	ETOHI1	305.334	-1.16268	0.31003	-3.75022	0.000176683	0.00112209
LIT_MM_BOOTH_SCRAPIE-INFECTED_BRAIN_DIFF	NDST1	1289.63	-1.16164	0.308989	-3.75948	0.000170269	0.00108992
LIT_MM_MEHRABIAN_LIVER_BXD-CROSS_ALOX5-LOCUS_DIFF	AR	221.48	-1.16146	0.251109	-4.62534	3.73992e-06	5.4754e-05
LIT_MM_LI_CO2_NEONATAL_LUNG_UP	CREB5	16.5983	-1.15945	0.289231	-4.00874	6.10444e-05	0.000481768
LIT_MM_IVANOVA_PATTERN2_DN	BAHCC1	218.749	-1.1592	0.233408	-4.96642	6.82013e-07	1.43219e-05
LIT_MM_WU_ES_VS_ES-TF-CELL_UP	LOXL2	209.248	-1.15524	0.265263	-4.35509	1.33012e-05	0.000145164
LIT_MM_DIVINA_GERMINAL-CELL_DN	HILS1	22.8777	-1.15516	0.404822	-2.85349	0.00432418	0.0141981
LIT_MM_CHEN_MACROPHAGE-ENRICHED-NETWORK_DIFF	CACNG7	178.775	-1.15488	0.315115	-3.66495	0.000247385	0.00146037
LIT_MM_KRUTZFELDT_LIVERS_ANTAGOMIR-122-TREATED_VS_MM-ANTAGOMIR-122_UP	PTAR1	42.1144	-1.15454	0.202989	-5.68768	1.28776e-08	6.24556e-07
LIT_MM_RODRIGUEZ_RESUMPTION-MEIOSIS_MURINE-COC_DRB_DN	ZFP526	93.6015	-1.15377	0.381846	-3.02155	0.00251481	0.00915675
GENESIGDB_MM_TORCHIA_07_LEUKEMIA	9830001H06RIK	229.961	-1.15326	0.195879	-5.8876	3.91842e-09	2.41731e-07
LIT_MM_STINGL_MRU-ENRICHED-FRACTION_DN	CDK19	942.836	-1.15111	0.178671	-6.44262	1.17426e-10	1.48278e-08
LIT_MM_MUTCH_INTESTINAL-TRACT_DIFF	ABCA2	828.956	-1.15103	0.246983	-4.66036	3.15664e-06	4.79068e-05
LIT_MM_DIVINA_GERMINAL-CELL_DN	1700020D05RIK	6.02864	-1.14973	0.398871	-2.88246	0.00394584	0.0132234
LIT_MM_HAMATANI_YOUNG_VS_AGED-OOCYTE_UP	MAST4	1131.91	-1.148	0.248028	-4.6285	3.68319e-06	5.41686e-05
LIT_MM_TURK_SEVERELY-AFFECTED_VS_LMILDLY-OR-NON-AFFECTED_UP	SVEP1	210.983	-1.14658	0.195552	-5.86331	4.53729e-09	2.72349e-07
LIT_MM_ULLOA-MONTOYA_MAPC-ESC_MSC_UP	PHF16	7.52716	-1.14423	0.433892	-2.63713	0.00836109	0.0242652
LIT_MM_LIM_ESCELL_SALL4-OCT4-SOX2-NANOG_COMMON-TARGET_DIFF	AGBL1	337.072	-1.14212	0.488949	-2.33587	0.0194981	0.0482321
LIT_MM_LIU_PIAS1-DEFICIENT_INTERFERON_UP	EPHB2	11.3474	-1.14144	0.386034	-2.95685	0.00310803	0.0108805
LIT_MM_TOMCZAK_MYOGENIC_2D_C2_DIFF	SPON2	25.6932	-1.14087	0.451806	-2.52513	0.0115654	0.0316084
LIT_MM_ZENG_1-CELL-TRANSIENT_PREIMPLANTATION_DIFF	PLEKHG1	111.279	-1.14073	0.155206	-7.34979	1.98514e-13	6.29133e-11
LIT_MM_RICKETTS_CAFESTOL-FED_E3L-MICE_DIFF	POGK	380.058	-1.1407	0.165259	-6.90251	5.10906e-12	1.05869e-09
LIT_MM_TURK_HINDLIMB-MUSCLE_DYSTROPHIN-DEFICIENT_DIFF	DVL3	483.041	-1.13984	0.48508	-2.3498	0.0187837	0.0467941
LIT_MM_TOMCZAK_MYOGENIC_2D_C4_DIFF	ZFP398	71.5437	-1.13942	0.278855	-4.08607	4.38733e-05	0.000368759
LIT_MM_SCHADT_LIVER_BXD-CROSS_DIFF	MYH10	478.417	-1.13857	0.238325	-4.77737	1.77607e-06	3.05934e-05
LIT_MM_ZHU_LPS_IFN-2_MA_PGE2_ISO_DIFF	FAM129A	215.402	-1.13724	0.25503	-4.45923	8.22557e-06	0.000100374
LIT_MM_EAVES_IDD3-5_VS_NOD_SPLEEN_DN	MLXIP	2122.4	-1.13716	0.198397	-5.73173	9.94143e-09	5.06887e-07
LIT_MM_LIADAKI_SIDE-POPULATION_MUSCLE_VS_BONE-MARROW_UP	GRLF1	1090.81	-1.13656	0.241906	-4.69836	2.62262e-06	4.13151e-05
LIT_MM_SUSZTAK_DB-DB_VS_DB-M_DIFF	ATP2B4	343.412	-1.1343	0.13141	-8.63175	6.04185e-18	5.74437e-15
LIT_MM_SCIUTO_EXPOSURE-PHOSGENE_DIFF	IQSEC1	1877.37	-1.13401	0.195493	-5.80075	6.60184e-09	3.64182e-07
LIT_MM_RIVOLTA_COCHLEAR_HAIR_DAY4_UP	C3	1445.05	-1.13368	0.234629	-4.83181	1.35295e-06	2.46447e-05
LIT_MM_VAN-ERP_GROUP-D_C57BL_VS_6BMDM_VS_YERSINIA-INFECTION_DIFF	ZMIZ2	1595.39	-1.13367	0.206306	-5.49508	3.90544e-08	1.51013e-06
LIT_MM_TABIBIAZAR_AGING_C3H_VS_C57-MICE_DIFF	CRYBG3	815.963	-1.13134	0.234569	-4.82308	1.4136e-06	2.54433e-05
LIT_MM_MILLER_CLOCK_CLOCK-SKELETAL-MUSCLE_DN	1110002L01RIK	34.4087	-1.13104	0.304636	-3.71275	0.00020502	0.00125316
LIT_MM_LICKERT_ALL-3AFFYMETRIX-MGU74V2-GENECHIP_UP	SPEN	746.596	-1.12633	0.194728	-5.78412	7.28908e-09	3.94133e-07
LIT_MM_GUMZ_ALDOSTERONE_DN	ITGA4	409.809	-1.12497	0.294795	-3.81612	0.000135566	0.000912604
LIT_MM_BUCHSTALLER_C5_E16_E18_P0_UP	ITIH5	537.402	-1.12446	0.210794	-5.3344	9.58627e-08	3.08038e-06
LIT_MM_SUSZTAK_STZ-TREATED_C57BL6-MICE_DIFF	DPYSL5	17.1701	-1.12242	0.307247	-3.65315	0.000259041	0.00150951
LIT_MM_SHETH_PAM4_TUMOR_LIVER_TXNIP-DEFICIENT_DIFF	SUFU	79.6063	-1.12217	0.355122	-3.15996	0.0015779	0.00633946
LIT_MM_TOMCZAK_MYOGENIC_2D_C3_DIFF	MEF2A	1675.86	-1.12155	0.481531	-2.32914	0.0198516	0.049009
LIT_MM_SPACH_CNS_1-25-OH-2D3_UP	SLC6A4	7.042	-1.12052	0.37575	-2.98208	0.00286296	0.0101746
LIT_MM_TABIBIAZAR_VASCULAR-WALL_VASCULAR_C57_UP	OLFML2A	54.0982	-1.1205	0.46139	-2.42853	0.0151601	0.0393943
LIT_MM_DIVINA_TOTAL-TESTIS_PEM-1-2PEMTT_MAPPED_DIFF	TSPAN18	48.9182	-1.12006	0.23822	-4.70181	2.57871e-06	4.07742e-05
LIT_MM_SUGINO_GABAERGIC_VS_GLUTAMATERGIC_NEURONAL_FOREBRAIN_DIFF	PSD3	728.398	-1.11873	0.181571	-6.16136	7.21225e-10	6.33541e-08
LIT_MM_PORTER_MEOM_MLM-MYOBLAST_DIFF	FOXN3	698.277	-1.11549	0.190568	-5.85349	4.81377e-09	2.86048e-07
LIT_MM_BOTTOMLY_STRIATUM_B6_D2_MICROARRAY_ILLUMINA_DIFF	ZFP382	9.28421	-1.11518	0.333242	-3.34647	0.000818477	0.00374125
LIT_MM_TURK_INBRED-STRAIN_DIFF	DST	13399.6	-1.11453	0.227435	-4.90042	9.56323e-07	1.87131e-05
LIT_MM_HUBER_LYMPHOTOXIN-BETA_LYMPH-NODE_FOLLICULAR-DENDRITIC-CELL_UP	SLIT3	226.261	-1.11412	0.176019	-6.32957	2.45853e-10	2.68917e-08
LIT_MM_ZHU_LBP_LP_DIFF	DOPEY2	704.723	-1.11347	0.170706	-6.52275	6.90303e-11	9.78717e-09
LIT_MM_HOFFMANN_T-CELL_LYMPHOCYTE_C12_DIFF	LAMC1	1885.19	-1.10896	0.180222	-6.1533	7.58854e-10	6.56728e-08
LIT_MM_ZENG_8-CELL-TRANSIENT_PREIMPLANTATION_DIFF	SCN4A	12023.4	-1.10881	0.301477	-3.67791	0.000235149	0.00140403
LIT_MM_RIVOLTA_COCHLEAR_HAIR_DAY9_UP	ITGA6	451.632	-1.10859	0.32068	-3.45701	0.000546206	0.00272311
LIT_MM_ZHU_LPS_IFN-2_MA_PGE2_ISO_DIFF	PTAFR	13.9743	-1.1053	0.327266	-3.37737	0.000731817	0.00342157
LIT_MM_HUANG_MAMMARY-TUMOR_MMTV-WNT-1_VS_MMTV-NEU-TG-MICE_DN	TLR5	34.0767	-1.10499	0.444623	-2.48523	0.0129468	0.0346168
GENESIGDB_MM_BOYLAN_07_BONE	4933439F18RIK	2141.51	-1.09934	0.182368	-6.02812	1.6588e-09	1.25874e-07
LIT_MM_TOMCZAK_MYOGENIC_2D_C2_DIFF	XRN1	209.407	-1.09838	0.326469	-3.36443	0.000767029	0.00355636
LIT_MM_BUCHSTALLER_C1_E9.5_UP	ZBTB16	1360.02	-1.09581	0.269754	-4.06228	4.85966e-05	0.000402803
LIT_MM_EAVES_IDD9_VS_NOD_SPLEEN_UP	SCARA5	339.487	-1.09383	0.175503	-6.23254	4.58935e-10	4.44178e-08
LIT_MM_BISAILLON_HOXA9-PKNOX1?MC_UP	GM6307	510.147	-1.0924	0.135826	-8.04265	8.79183e-16	5.26305e-13
LIT_MM_SUSZTAK_DB-DB_VS_DB-M_DIFF	TUBGCP6	266.308	-1.09209	0.346926	-3.14791	0.00164441	0.00656262
LIT_MM_TOMCZAK_MYOGENIC_2D_C3_DIFF	PRELP	701.476	-1.09147	0.207384	-5.26301	1.41712e-07	4.21047e-06
LIT_MM_MA_E2F1_DN	IL1R1	235.833	-1.09104	0.241451	-4.51868	6.22249e-06	8.11082e-05
LIT_MM_SHAROVA_CORRELATED-PC1-0.69PC2_STRAIN_DIFF	8030462N17RIK	472.558	-1.0901	0.325786	-3.34607	0.000819651	0.00374555
LIT_MM_PORTER_DIAPHRAGM_VS_HINDLIMB-MUSCLE_DIFF	PFKFB3	7228.88	-1.08995	0.431665	-2.52499	0.0115703	0.0316163
LIT_MM_TRIMARCHI_BRN3A_PVALUE-LT0.001_DIFF	FAM78B	40.945	-1.08989	0.22458	-4.85299	1.21615e-06	2.27507e-05
LIT_MM_GREEN_B6J-ALCOHOL_FOCAL-ADHESION-SYSTEM_3H_DN	COL5A3	701.911	-1.08961	0.222265	-4.90231	9.47163e-07	1.86015e-05
LIT_MM_ZHU_LBP_LP_DIFF	MFAP3L	184.068	-1.08915	0.1242	-8.7693	1.79783e-18	2.26987e-15
LIT_MM_SUSZTAK_STZ-TREATED_C57BL6-MICE_DIFF	ST3GAL1	450.776	-1.08693	0.18733	-5.8022	6.54491e-09	3.63491e-07
LIT_MM_ZENG_2-CELL-TRANSIENT_PREIMPLANTATION_DIFF	ANTXR1	227.747	-1.08588	0.254692	-4.26349	2.01257e-05	0.000199077
LIT_MM_BEGLOPOULOS_CEREBRAL-CORTEX_PRESENILIN_DN	GDF11	98.3807	-1.08571	0.314831	-3.44854	0.000563626	0.00279017
LIT_MM_POTIREDDY_MMRNA_LATE-1-CELL-EMBRYOS_UP	ATP2B3	262.052	-1.08498	0.289276	-3.75068	0.000176357	0.0011209
LIT_MM_MIJALSKI_16DUAL-COLOR_HYBRIDIZATIONS_KIDNEY_UP	BC068281	75.7885	-1.08403	0.272641	-3.97604	7.00727e-05	0.000540355
LIT_MM_MEYER_LOW-PHOSPHATE-DIET_NORMAL-MICE_UP	MED12	673.773	-1.08383	0.314275	-3.44866	0.000563376	0.00278978
LIT_MM_HOFFMANN_T-CELL_LYMPHOCYTE_C20_DIFF	DPP4	84.2908	-1.08299	0.245302	-4.41492	1.01047e-05	0.000116781
LIT_MM_MIROTSOU_MI-LV_TAC-LV_TAC-SEPTUM_UP	COL5A2	665.728	-1.08155	0.371568	-2.91078	0.00360524	0.0122766
LIT_MM_TURK_INBRED-STRAIN_DIFF	COL4A3	48.9591	-1.08141	0.211554	-5.11175	3.19193e-07	7.96159e-06
LIT_MM_HOFFMANN_B-CELL_LYMPHOCYTE_C14_DIFF	USP24	3982.8	-1.07963	0.209847	-5.14483	2.67766e-07	6.94689e-06
LIT_MM_RENTHAL_COCAINE-HDAC5KO_SALINE-HDAC5KO_UP	4930579G18RIK	33.2294	-1.07937	0.349828	-3.08543	0.00203255	0.00774997
LIT_MM_RECINOS_LIVER_DIETARY-FAT_LDLR-PLUS_VS_PLUS-HF-LF_DN	EGFR	163.763	-1.07931	0.172829	-6.24498	4.23865e-10	4.17739e-08
LIT_MM_KRUTZFELDT_LIVERS_ANTAGOMIR-122-TREATED_VS_MM-ANTAGOMIR-122_UP	P2RY13	8.23976	-1.07923	0.461175	-2.34018	0.0192743	0.0477882
LIT_MM_LIADAKI_SIDE-POPULATION_MUSCLE_VS_BONE-MARROW_UP	NAALAD2	98.8646	-1.07916	0.186554	-5.78467	7.26545e-09	3.94133e-07
LIT_MM_YAO_29M-BDF1-MICE_TESTIS_UP	LRP5	779.77	-1.07659	0.242603	-4.43767	9.09384e-06	0.000108315
LIT_MM_HUTTON_IMMUNE_DIFF	GM15800	692.518	-1.07636	0.22344	-4.81722	1.45573e-06	2.61143e-05
LIT_MM_PORTER_DIAPHRAGM_VS_HINDLIMB-MUSCLE_DIFF	P2RY1	232.993	-1.07609	0.149952	-7.1762	7.16747e-13	1.99738e-10
LIT_MM_BAE_ONCOGENIC-RAS_TGFB1-MEDIATED_DIFF	TECPR2	490.133	-1.07503	0.179263	-5.99692	2.011e-09	1.46414e-07
LIT_MM_COSTOYA_AV2_ZFP145-PLUS_VS_ZFP145-MINUS_UP	ARHGAP5	1053.63	-1.07432	0.234582	-4.57971	4.65615e-06	6.53192e-05
LIT_MM_AIBA_ESCELL_PRIMITIVE-ENDODERM-LINEAGE_DIFF	GM2176	14.7173	-1.07377	0.408311	-2.6298	0.00854363	0.0247164
LIT_MM_RENTHAL_COCAINE-HDAC5KO_SALINE-HDAC5KO_DN	CLEC3A	7.45264	-1.07287	0.436453	-2.45815	0.0139655	0.0368831
LIT_MM_HODGES_R6-1_BRAIN_HUNTINGTON_DISTANCE-MOVED_30M_DIFF	NOS1AP	13.8907	-1.07219	0.422495	-2.53777	0.0111562	0.0306976
LIT_MM_ZENG_1-CELL-TRANSIENT_PREIMPLANTATION_DIFF	LNPEP	360.773	-1.07086	0.347874	-3.0783	0.00208184	0.00788265
LIT_MM_SPACH_CNS_EAE_DN	CACNA1G	65.7111	-1.07049	0.192238	-5.5686	2.56798e-08	1.07669e-06
LIT_MM_ZENG_MATERNAL-ZYGOTIC_PREIMPLANTATION_DIFF	PCNX	2914.18	-1.06933	0.187481	-5.70367	1.17256e-08	5.8135e-07
LIT_MM_MASSARO_CALORIE_VS_AD-LIBITUM_336H_DN	MMP15	580.017	-1.06891	0.165381	-6.46333	1.02427e-10	1.31391e-08
LIT_MM_DIVINA_TOTAL-TESTIS_PEM-1-2PEMTT_MAPPED_DIFF	ZBTB37	20.7039	-1.06873	0.346692	-3.08265	0.00205166	0.00780443
LIT_MM_SUSZTAK_DB-DB_VS_DB-M_DIFF	SPNS2	1846.89	-1.0685	0.249297	-4.28607	1.81859e-05	0.000184742
LIT_MM_SPACH_CNS_1-25-OH-2D3_DN	MTR	404.019	-1.06683	0.248778	-4.28828	1.80063e-05	0.000183387
LIT_MM_SHAROVA_CORRELATED-PC1-0.69PC2_STRAIN_DIFF	KLHL3	15.253	-1.06587	0.390419	-2.73008	0.00633196	0.0193832
LIT_MM_SUSZTAK_STZ-TREATED_C57BL6-MICE_DIFF	TUBB4A	19.9623	-1.0651	0.292023	-3.6473	0.000265014	0.00153638
LIT_MM_LIADAKI_SIDE-POPULATION_MUSCLE_VS_BONE-MARROW_UP	LHX6	42.1786	-1.06503	0.231875	-4.59311	4.36691e-06	6.19154e-05
LIT_MM_MIJALSKI_16DUAL-COLOR_HYBRIDIZATIONS_KIDNEY_UP	BICC1	118.303	-1.06425	0.151051	-7.04567	1.84576e-12	4.27928e-10
LIT_MM_ZHU_LPS_IFN-2_MA_PGE2_ISO_DIFF	HIVEP1	550.292	-1.06291	0.204905	-5.18734	2.13323e-07	5.85611e-06
LIT_MM_IACOBAS_ALL-GENETICALLY-MODIFIED-BRAIN_DN	DAAM2	159.66	-1.06102	0.183186	-5.79205	6.95336e-09	3.80974e-07
LIT_MM_HOLLOWAY_LIVER_HNF4ALPHA-KO_SEX-INDEPEND_DIFF	FAM124B	8.96766	-1.05997	0.418281	-2.53412	0.0112731	0.0309559
LIT_MM_LOH_ESCELL_JMJD2C-KO_UP	TTBK1	6.94393	-1.05921	0.387739	-2.73176	0.00629976	0.0192956
LIT_MM_RAVASI_CENTRAL-NERVOUS-SYSTEM_NCRNA_UP	MIAT	28.0997	-1.05823	0.430233	-2.45968	0.0139062	0.0367625
LIT_MM_HAMATANI_YOUNG_VS_AGED-OOCYTE_UP	BCL9	77.6658	-1.05746	0.290237	-3.64342	0.000269038	0.00155623
LIT_MM_MIJALSKI_16DUAL-COLOR_HYBRIDIZATIONS_KIDNEY_UP	WDFY3	974.803	-1.05659	0.221505	-4.77005	1.84176e-06	3.15343e-05
LIT_MM_ESAU_LIVER_4W_ALINE_VS_MIR-122-ASO-2W_DN	DCHS1	140.429	-1.05633	0.280513	-3.76573	0.000166066	0.00106809
LIT_MM_ZENG_1-CELL-TRANSIENT_PREIMPLANTATION_DIFF	NUP98	322.309	-1.05461	0.307551	-3.42907	0.000605661	0.00294504
LIT_MM_MCMULLEN_INSULIN_CARDIAC-MYOCYTE_DIFF	IMPAD1	1887.02	-1.05384	0.262401	-4.01613	5.91615e-05	0.000471513
LIT_MM_LINDSLEY_D6_NT-PLUS_VS_NT_UP	MEGF6	22.8551	-1.05374	0.228867	-4.60414	4.14176e-06	5.96642e-05
GENESIGDB_MM_CRAWFORD_07_BREAST	1110018J18RIK	289.278	-1.05356	0.256793	-4.10278	4.08211e-05	0.0003491
LIT_MM_ZENG_8-CELL-TRANSIENT_PREIMPLANTATION_DIFF	ZFP180	444.836	-1.05356	0.166492	-6.32802	2.48333e-10	2.68917e-08
LIT_MM_TOMCZAK_MYOGENIC_2D_C3_DIFF	LYNX1	3510.85	-1.05245	0.183722	-5.72849	1.01331e-08	5.13423e-07
LIT_MM_TSUCHIYA_DF-CR-DF-CR_HEPATIC_DIFF	GCK	110.843	-1.04843	0.232405	-4.51121	6.44587e-06	8.30156e-05
LIT_MM_DAUPHINOT_P30_VARAN_ANOVA_DIFF	NPAS1	6.65731	-1.04823	0.418078	-2.50725	0.0121674	0.0329168
LIT_MM_IACOBAS_CX43-NULL-ASTROCYTES_MOST-VARIABLY_DIFF	AKAP12	267.779	-1.04817	0.158014	-6.63337	3.28101e-11	5.09913e-09
LIT_MM_TOMCZAK_MYOGENIC_2D_C3_DIFF	ADAMTS2	206.715	-1.0447	0.22878	-4.56642	4.96122e-06	6.81872e-05
LIT_MM_SILVA-VARGAS_4-HYDROXYTAMOXIFEN_K14-BETAN-CATENINER_UP	FADS2	34.4885	-1.04452	0.257185	-4.06134	4.87918e-05	0.000404007
LIT_MM_LIADAKI_MUSCLE_SIDE-POPULATION_VS_MAIN-POPULATION_UP	MKL1	861.325	-1.04338	0.196601	-5.30708	1.11398e-07	3.4759e-06
LIT_MM_PORTER_MEOM_MLM-MYOBLAST_DIFF	WNT5A	91.3041	-1.04301	0.218786	-4.76725	1.86756e-06	3.1841e-05
LIT_MM_KUNIKATA_C4_ALLERGEN_DN_EP3-AGONIST_UP	PPL	123.826	-1.04252	0.246739	-4.22518	2.38745e-05	0.000228199
LIT_MM_ZENG_MATERNAL_PREIMPLANTATION_DIFF	PLCE1	90.0739	-1.04181	0.176669	-5.89696	3.70264e-09	2.30176e-07
LIT_MM_LIN_HAIR-CYCLE_HAIR-FOLLICLE_DIFF	WNT10B	10.1243	-1.04066	0.388275	-2.68022	0.00735748	0.0218681
LIT_MM_PORTER_MDX_HINDLIMB_MUSCLE_DIFF	WNK2	2847.14	-1.04024	0.252558	-4.11883	3.80797e-05	0.000329488
LIT_MM_DIVINA_TOTAL-TESTIS-SOMATIC-CELL_PEM-1-2PEMTT_MAPPED_DIFF	NTN4	130.671	-1.03991	0.237193	-4.38425	1.16386e-05	0.000130817
LIT_MM_SYMULA_CDK4_VS_ES-CELL-LINE_DIFF	TECTA	19.2518	-1.03977	0.310933	-3.34403	0.000825696	0.00376998
LIT_MM_SYMULA_CDK4_VS_ES-CELL-LINE_DIFF	KIF3C	1402.63	-1.0383	0.196311	-5.28906	1.22946e-07	3.75768e-06
LIT_MM_TOMCZAK_MYOGENIC_2D_C3_DIFF	SNTB1	28.565	-1.03604	0.428951	-2.41529	0.0157226	0.0406545
LIT_MM_PAN_2FOLD-HIGHER_OOCYTE-ANTRAL-STAGE_C0D_VS_UNPRIMED_UP	TNRC18	1052.61	-1.03568	0.228152	-4.53944	5.64036e-06	7.49097e-05
LIT_MM_APRIL_MELAN_IMPOVERISHED_DN	GRM1	28.2399	-1.03563	0.295425	-3.50556	0.000455653	0.00235596
LIT_MM_HOFFMANN_B-CELL_LYMPHOCYTE_C12_DIFF	SCD2	531.273	-1.03416	0.182567	-5.66458	1.47388e-08	6.82586e-07
LIT_MM_MIROTSOU_LV_SEPTUM_HEART_DIFF	HUWE1	4967.77	-1.03379	0.257182	-4.01968	5.82776e-05	0.000465616
MSIGDB_MM_GRAESSMANN_APOPTOSIS_BY_DOXORUBICIN_DN	FAM48A	146.524	-1.03323	0.3547	-2.91297	0.00358006	0.0122232
LIT_MM_MIJALSKI_16DUAL-COLOR_HYBRIDIZATIONS_KIDNEY_UP	RNF24	42.4642	-1.03275	0.378533	-2.72831	0.00636605	0.0194691
LIT_MM_ZHU_LBP_LP_DIFF	CCBP2	18.0947	-1.03251	0.285869	-3.61183	0.000304046	0.0017117
LIT_MM_ZENG_1-CELL-TRANSIENT_PREIMPLANTATION_DIFF	KLHL28	114.739	-1.03248	0.329891	-3.12976	0.00174951	0.00688515
LIT_MM_LU_ESTROGEN-PROGESTERONE_VS_VEHICLE-TREATMENT_DIFF	BTNL9	50.9807	-1.03243	0.304098	-3.39506	0.000686134	0.00324648
LIT_MM_MA_E2F1_UP	MAP3K3	621.789	-1.03221	0.254968	-4.0484	5.15695e-05	0.000422248
LIT_MM_BYSTRYKH_TRANS_HEMATOPOIETIC-STEM-CELL-TRANSCRIPT_DIFF	ZDHHC5	2639.67	-1.03109	0.203054	-5.07789	3.81647e-07	9.0807e-06
LIT_MM_RIVOLTA_COCHLEAR_HAIR_DAY4_UP	NOTCH3	768.81	-1.03029	0.214654	-4.79976	1.58857e-06	2.80001e-05
LIT_MM_RIVOLTA_COCHLEAR_HAIR_DAY9_UP	MAN1A	235.641	-1.03017	0.175202	-5.87987	4.10577e-09	2.50421e-07
GENESIGDB_MM_DAIGO_03_LEUKEMIA	SPNB2	3909.99	-1.0297	0.170477	-6.04014	1.53984e-09	1.19519e-07
LIT_MM_SABER_LIVER_CB_DEP_DIFF	D630003M21RIK	46.8246	-1.02863	0.189913	-5.41632	6.08385e-08	2.16593e-06
LIT_MM_CHEN_DELAYED_PACAP?DEPENDENCE_STROKE_DIFF	ZFP385B	198.618	-1.02822	0.333873	-3.07968	0.00207225	0.00785917
LIT_MM_LEE_HUNTINGTIN_POLYGLUTAMINE-TRACT_STRIATAL-CELL_UP	LOXL4	29.5104	-1.02638	0.255889	-4.01102	6.04568e-05	0.000479374
LIT_MM_ROGERS_MASCULINE_TUMORIGENIC-HEPATITIS_UP	CYP2U1	96.6338	-1.02604	0.247891	-4.13909	3.48686e-05	0.0003078
LIT_MM_DAUPHINOT_P15_VARAN_ANOVA_DIFF	MAB21L2	8.72963	-1.02578	0.402174	-2.55058	0.0107544	0.0298102
LIT_MM_ENG_EST_BRN3A-MUTANT_DIFF	DCLK3	13.2071	-1.02509	0.262278	-3.9084	9.29104e-05	0.000675217
LIT_MM_TOMCZAK_MYOGENIC_2D_C4_DIFF	FGD3	9.66667	-1.02395	0.380247	-2.69285	0.0070844	0.0211459
LIT_MM_TURK_INBRED-STRAIN_DIFF	PDE10A	139.07	-1.02283	0.193746	-5.27924	1.29718e-07	3.91895e-06
LIT_MM_WELLS_MACROPHAGE_RIKEN-CLONE_FANTOM_DIFF	COL14A1	192.686	-1.02201	0.385137	-2.65363	0.00796317	0.0233126
LIT_MM_YAO_29M-BDF1-MICE_TESTIS_UP	SLC16A7	9.12907	-1.022	0.352626	-2.89826	0.00375241	0.0126857
LIT_MM_YAO_6HP4_KO_VS_SAM_UP	TNXB	1217.62	-1.02163	0.159417	-6.40849	1.46966e-10	1.7727e-08
LOC_MM_CHR15_E1	GM16576	196.458	-1.02133	0.265354	-3.84894	0.000118629	0.000824333
LIT_MM_DIVINA_TOTAL-TESTIS-SOMATIC-CELL_PEM-1-2PEMTT_MAPPED_DIFF	B4GALNT3	19.3105	-1.02079	0.424192	-2.40644	0.0161089	0.0414562
LIT_MM_SHAROVA_CORRELATED-PC1-0.69PC2_STRAIN_DIFF	RIMS4	24.4844	-1.02055	0.261729	-3.89925	9.64916e-05	0.000697181
LIT_MM_HALDAR_SYT-SSX_DN	ZFP493	51.3579	-1.02045	0.205352	-4.96928	6.72026e-07	1.41986e-05
LIT_MM_MILLER_6D-GFP-CELL_D0-D4-D6-GFP-CELL_FDR0.05_DN	NWD1	48.5159	-1.01952	0.321249	-3.17362	0.00150553	0.00610023
LIT_MM_TOMCZAK_MYOGENIC_2D_C4_DIFF	SIPA1L3	134.918	-1.01853	0.211125	-4.82431	1.4049e-06	2.53199e-05
LIT_MM_DAUPHINOT_P30_VARAN_ANOVA_DIFF	5031439G07RIK	3612.67	-1.01679	0.17832	-5.70205	1.18379e-08	5.85123e-07
LIT_MM_HAMRA_I-NC-LIST_POSTNATAL-TESTIS_DIFF	DGKH	25.9079	-1.01615	0.268556	-3.78376	0.000154474	0.00100757
LIT_MM_ZENG_MATERNAL-ZYGOTIC_PREIMPLANTATION_DIFF	TRPM6	7.94121	-1.01523	0.344418	-2.94767	0.00320181	0.0111604
LIT_MM_SHAROVA_CORRELATED-PC1-0.69PC2_STRAIN_DIFF	ZFHX2	208.056	-1.01379	0.206599	-4.90705	9.24585e-07	1.82467e-05
LIT_MM_RENTHAL_SALINE-HDAC5KO_SALINE_DN	PCDHGB7	23.0554	-1.0137	0.417165	-2.42996	0.0151004	0.0392707
LIT_MM_LUKAS_MOUSE-SPINAL-CORD_DIFF	SORCS1	14.192	-1.01266	0.274567	-3.68822	0.000225827	0.00135874
LIT_MM_YAO_6HP4_KO_VS_SAM_UP	LAMA2	860.142	-1.01018	0.180932	-5.5832	2.36135e-08	1.00929e-06
LIT_MM_CHAHROUR_MECP2-TG_UP	NHS	50.6778	-1.01009	0.37888	-2.66599	0.00767626	0.0226449
LIT_MM_ZENG_1-CELL-TRANSIENT_PREIMPLANTATION_DIFF	ABL2	799.04	-1.00895	0.169252	-5.9612	2.50386e-09	1.70041e-07
LIT_MM_HAMRA_I-NC-LIST_POSTNATAL-TESTIS_DIFF	NR1D1	4293.15	-1.00714	0.196285	-5.13099	2.88221e-07	7.35941e-06
LIT_MM_BARASH_48H_EC-BOUT_DN	AQP4	879.425	-1.00661	0.157178	-6.40426	1.51098e-10	1.78263e-08
LIT_MM_TABIBIAZAR_VASCULAR-WALL_VASCULAR_C57_UP	RAPGEF5	82.5232	-1.00502	0.41581	-2.41701	0.0156485	0.0405006
LIT_MM_LEE_3-NP_VS_VEHICLE-TREATED_STRIATAL-CELL_UP	LRCH3	294.962	-1.00498	0.34271	-2.93245	0.00336299	0.011617
LIT_MM_CHEN_TE18.5C_VS_E14.5C_KIDNEY_UP	RAB11FIP3	2749.28	-1.00434	0.209188	-4.80112	1.57783e-06	2.78762e-05
LIT_MM_ZHU_LPS_IFN-2_MA_PGE2_ISO_DIFF	RYBP	48.2012	-1.00401	0.30143	-3.33084	0.000865857	0.00390481
LIT_MM_RAVASI_CENTRAL-NERVOUS-SYSTEM_NCRNA_UP	AKAP5	26.1994	-1.00331	0.311932	-3.21643	0.00129795	0.00540857
LIT_MM_DONZE_PKR_DN	LRP1	1670.03	-1.00287	0.167947	-5.97134	2.35311e-09	1.63233e-07
LIT_MM_MUTCH_INTESTINAL-TRACT_DIFF	ABCA8B	574.109	-1.00282	0.196428	-5.1053	3.30271e-07	8.16355e-06
LIT_MM_LIADAKI_SIDE-POPULATION_MUSCLE_VS_BONE-MARROW_UP	ZFP532	404.768	-1.00275	0.161221	-6.21969	4.98133e-10	4.73607e-08
LIT_MM_KIM_B6_VS_A_J_P0.5-WHOLE-BRAIN_DN	3110021N24RIK	148.75	-1.00185	0.221583	-4.52135	6.14472e-06	8.02887e-05
LIT_MM_FORSBERG_LT-HSC_VS_MPP_UP	HEATR5A	666.872	-1.00062	0.176499	-5.66926	1.43419e-08	6.66117e-07
LIT_MM_ZENG_2-CELL-TRANSIENT_PREIMPLANTATION_DIFF	ZFYVE26	463.298	-1.00054	0.215251	-4.64825	3.34757e-06	4.99601e-05
LIT_MM_DENOLET_SCARKO_UP	EMILIN3	7.23836	-1.00048	0.407658	-2.45422	0.0141189	0.037191
LIT_MM_ZHU_LPS_IFN-2_MA_PGE2_ISO_DIFF	HEATR5B	242.639	-1.00045	0.21955	-4.55682	5.19348e-06	7.04805e-05
LIT_MM_TOMCZAK_MYOGENIC_2D_C4_DIFF	BACE1	1161.22	-1.00041	0.188666	-5.30252	1.14213e-07	3.53597e-06
LIT_MM_ANISIMOV_P19-EC-CELL_SAGE-CATALOGS_DIFF	RPL35	1708.81	1.00138	0.167812	5.9673	2.41214e-09	1.64504e-07
LIT_MM_ANISIMOV_P19-EC-CELL_SAGE-CATALOGS_DIFF	RPS19	1469.37	1.00203	0.185988	5.38764	7.13897e-08	2.4292e-06
LIT_MM_HOFFMANN_B-CELL_LYMPHOCYTE_C10_DIFF	PAFAH1B3	16.2564	1.0038	0.377803	2.65693	0.00788549	0.0231313
LIT_MM_ZHU_LPS_IFN-2_MA_PGE2_ISO_DIFF	CAMK2N2	30.2049	1.00388	0.308273	3.25648	0.00112802	0.00485287
LIT_MM_ZENG_1-CELL-TRANSIENT_PREIMPLANTATION_DIFF	KIF20B	11.7	1.00431	0.423415	2.37194	0.017695	0.0445767
LIT_MM_HOFFMANN_T-CELL_LYMPHOCYTE_C2_DIFF	CRIP1	616.124	1.00448	0.306131	3.28122	0.00103361	0.00452129
LIT_MM_YAO_14M-SAMPL-MICE_TESTIS_DN	TBCB	698.375	1.00553	0.161638	6.22089	4.94351e-10	4.73546e-08
LIT_MM_CLERCH_DEX_VS_DIL_UP	TMEM37	1105.81	1.00635	0.226595	4.4412	8.94569e-06	0.000106945
LIT_MM_SHETH_PAM2_TUMOR_LIVER_TXNIP-DEFICIENT_DIFF	RDH9	18.9695	1.00706	0.306236	3.28852	0.00100715	0.00442715
LIT_MM_NUWAYSIR_LIVER_VS_SPLEEN_ARRAY_UP	B2M	3115.92	1.00785	0.242616	4.1541	3.26569e-05	0.000292105
LIT_MM_RAWLS_M-MICE_VS_GF-MICE_DN	NUDT16	208.034	1.00892	0.171867	5.87038	4.34785e-09	2.64189e-07
LIT_MM_WELLS_MACROPHAGE_RIKEN-CLONE_FANTOM_DIFF	ATF3	123.007	1.01092	0.293938	3.43921	0.000583413	0.00286617
LIT_MM_GOVONI_6H_24H-GH-TREATMENT_UP	2310009B15RIK	177.515	1.01097	0.211623	4.77722	1.77735e-06	3.05934e-05
LIT_MM_CHALLEN_GFP-VE-URETERIC-TREE_VS_GFP-VE-CELL-POPULATION_UP	ROS1	12.0564	1.01136	0.399263	2.53306	0.0113071	0.0310233
LIT_MM_HOFFMANN_T-CELL_LYMPHOCYTE_C11_DIFF	TNFAIP8L1	28.5239	1.01229	0.345272	2.93185	0.00336953	0.0116371
LIT_MM_ZHU_LBP_LP_DIFF	FBXO5	15.1356	1.01432	0.367658	2.75888	0.00580003	0.0180593
LIT_MM_SAMAL_ADRENAL-GLAND_PACAP-RESPONSE-TRANSCRIPT_UP	LHFPL4	20.4329	1.01485	0.227497	4.46092	8.16088e-06	9.99275e-05
LIT_MM_ZAKIN_OTX22Y2_GASTRULATING-EMBRYO_UP	ROMO1	1680.59	1.01523	0.167811	6.04983	1.44999e-09	1.13768e-07
LIT_MM_TOMCZAK_MYOGENIC_2D_C3_DIFF	TNNT1	163.951	1.01559	0.307852	3.29897	0.000970399	0.00429233
LIT_MM_SCHWARTZ_KIDNEY_ANGIOTENSIN-II_CONTROL-SAGE_UP	ATP5L	343.22	1.01661	0.170153	5.97468	2.30538e-09	1.60611e-07
GENESIGDB_MM_CRAFT_08_VIRAL	1700029F09RIK	72.2354	1.0167	0.192763	5.27434	1.33234e-07	4.01018e-06
LIT_MM_NUWAYSIR_LIVER_VS_SPLEEN_ARRAY_UP	PSMB4	4173.21	1.0168	0.17083	5.95215	2.64636e-09	1.75741e-07
LIT_MM_ANISIMOV_P19-EC-CELL_SAGE-CATALOGS_DIFF	RPS13	2923.16	1.01696	0.187193	5.4327	5.55073e-08	2.02694e-06
LIT_MM_WELLS_LPS-INDUCIBLE_BALB-C_C3H-ARC_NOT-C3H-HEJ-STRAIN_DIFF	HMGB2	86.4401	1.0183	0.221836	4.59034	4.42517e-06	6.25757e-05
LIT_MM_DONZE_PKR_UP	ERDR1	156.087	1.01871	0.39951	2.54989	0.0107758	0.0298542
LIT_MM_SPACH_CNS_EAE_UP	H2-Q4	676.66	1.01925	0.249805	4.08019	4.4998e-05	0.000376865
LIT_MM_FANG_LACRIMAL-GLAND_CORNEAL-TRAUMA-ONCE_DIFF	GRHL1	20.5629	1.01969	0.278043	3.66737	0.00024506	0.00144876
LIT_MM_MEYER_LOW-PHOSPHATE-DIET_NORMAL-MICE_UP	2410004N09RIK	71.7136	1.02029	0.265539	3.84235	0.000121862	0.000841736
LIT_MM_SPACH_CNS_EAE_UP	CORO1A	146.061	1.02128	0.346185	2.9501	0.00317671	0.0110849
LIT_MM_FUNATSU_MEDIAL-REGION_UP	IFT27	215.132	1.02148	0.215377	4.74274	2.10842e-06	3.4845e-05
LIT_MM_WU_ES_VS_ES-TF-CELL_UP	A930015D03RIK	19.2491	1.02491	0.287962	3.5592	0.000371992	0.00200551
LIT_MM_MEYER_LOW-PHOSPHATE-DIET_HYP-MICE_DN	MATK	21.5893	1.0251	0.378053	2.71153	0.00669737	0.0202394
LIT_MM_WAHL_EARLY-CHONDROGENESIS_ATDC5-CELL_BONE-MORPHOGENETIC_DN	RPS14	5702.07	1.02582	0.21114	4.85848	1.18289e-06	2.23353e-05
LIT_MM_WELLS_LPS-INDUCIBLE_BALB-C_C3H-ARC_NOT-C3H-HEJ-STRAIN_DIFF	POMP	2011.36	1.0263	0.170564	6.0171	1.77574e-09	1.32264e-07
LIT_MM_PORTER_MDX_HINDLIMB_MUSCLE_DIFF	PLEKHO1	548.162	1.02829	0.215483	4.77202	1.8239e-06	3.13281e-05
LIT_MM_ZENG_MATERNAL-ZYGOTIC_PREIMPLANTATION_DIFF	SPC24	51.4941	1.03017	0.254117	4.05391	5.0369e-05	0.000413886
LIT_MM_HOFFMANN_T-CELL_LYMPHOCYTE_C8_DIFF	TYMS	17.6675	1.03365	0.403236	2.56339	0.0103656	0.028926
LIT_MM_HAMRA_I-NC-LIST_POSTNATAL-TESTIS_DIFF	HIST1H4H	255.713	1.0351	0.226372	4.57256	4.81807e-06	6.6845e-05
LIT_MM_ANISIMOV_P19-EC-CELL_SAGE-CATALOGS_DIFF	RPL41	3060.27	1.0353	0.20279	5.10527	3.3032e-07	8.16355e-06
LIT_MM_BLAXALL_NORMAL_HF_DIFF	NPPA	7.20025	1.03547	0.430393	2.40588	0.0161336	0.0415037
LIT_MM_CROKER_SOCS3-ALB_LIVER_IL-6_UP	SLC10A6	48.0246	1.03568	0.277935	3.72633	0.00019429	0.00120221
LIT_MM_MIJALSKI_16DUAL-COLOR_HYBRIDIZATIONS_LIVER_UP	CTH	64.4203	1.03729	0.197807	5.24397	1.57157e-07	4.57437e-06
LIT_MM_ATTANASIO_GLIS2-MUTANT_KIDNEY_UP	NRADD	31.1734	1.03734	0.220503	4.70444	2.54565e-06	4.03782e-05
LIT_MM_TOMCZAK_MYOGENIC_2D_C4_DIFF	H2-T10	20.4486	1.03751	0.322056	3.22153	0.00127508	0.00532948
LIT_MM_ZHU_LPS_IFN-2_MA_PGE2_ISO_DIFF	BUB1B	24.8523	1.03834	0.360487	2.88039	0.00397185	0.0132912
LIT_MM_HOFFMANN_T-CELL_LYMPHOCYTE_C6_DIFF	PSAT1	43.6194	1.03846	0.320704	3.23806	0.00120346	0.00509204
LIT_MM_SUSZTAK_MESANGIAL-MATRIX_VS_MINIMALMESANGIAL_DIFF	RHOC	864.325	1.03916	0.137627	7.55054	4.33464e-14	1.7088e-11
LIT_MM_HOFFMANN_T-CELL_LYMPHOCYTE_C6_DIFF	ATPIF1	449.811	1.03958	0.1974	5.26634	1.39171e-07	4.14799e-06
LIT_MM_FREY_KIDNEY_PEPT2-DEFICIENT_20K-CDNA_UP	CDA	16.6247	1.04101	0.340761	3.05496	0.00225091	0.0083597
LIT_MM_SPACH_CNS_1-25-OH-2D3_DN	MAP1LC3A	6735.43	1.04273	0.174123	5.98849	2.11801e-09	1.50808e-07
LIT_MM_SHETH_PAM4_TUMOR_LIVER_TXNIP-DEFICIENT_DIFF	IMMP2L	136.462	1.04376	0.211614	4.93237	8.1237e-07	1.6311e-05
LIT_MM_ZENG_MATERNAL-ZYGOTIC_PREIMPLANTATION_DIFF	GINS1	36.4854	1.04563	0.206344	5.06743	4.03232e-07	9.48171e-06
LIT_MM_ANISIMOV_P19-EC-CELL_SAGE-CATALOGS_DIFF	EEF1B2	3470.98	1.04753	0.188524	5.55648	2.75271e-08	1.13596e-06
LIT_MM_PAN_PRESENT_VS_ABSENT_5FOLD_PRIMORDIAL_VS_PRIMARY-STAGE_DN	C920006O11RIK	32.9059	1.05069	0.238638	4.40284	1.06841e-05	0.000122127
LIT_MM_BRUNELLI_D16_D351_UP	HOXC8	61.2372	1.05275	0.324266	3.24656	0.00116808	0.00497882
LIT_MM_DIVINA_TOTAL-TESTIS_PEM-1-2PEMTT_MAPPED_DIFF	WNT5B	84.9778	1.05373	0.191408	5.50518	3.68792e-08	1.44679e-06
LIT_MM_TOMCZAK_MYOGENIC_2D_C3_DIFF	CHRNA1	502.518	1.05401	0.20345	5.18069	2.21068e-07	6.01537e-06
LIT_MM_CHALLEN_4-HYBRIDIZATION_10.5DPC-IM_VS_MM_DN	0610040B10RIK	26.5262	1.05488	0.277781	3.79752	0.000146152	0.000966946
LIT_MM_ESAU_LIVER_4W_ALINE_VS_MIR-122-ASO-2W_UP	KATNAL2	31.3396	1.05545	0.300346	3.5141	0.000441239	0.00229538
LIT_MM_EDWARDS_CD4_VS_CD8ALPHA_DN	CTLA2B	59.875	1.0555	0.234846	4.49442	6.97604e-06	8.83482e-05
LIT_MM_HOFFMANN_T-CELL_LYMPHOCYTE_C17_DIFF	IFIT3	96.4511	1.0571	0.295623	3.57584	0.000349104	0.0019037
LIT_MM_HUANG_VIRGIN-MAMMARY-GLAND-NON-TG-MICE_VS_HYPERPLASTIC-MAMMARY-GLAND-MMTV-WNT-1TG_UP	MPV17L	19.2175	1.05722	0.276486	3.82377	0.000131426	0.000891785
LIT_MM_ANISIMOV_P19-EC-CELL_SAGE-CATALOGS_DIFF	TUBA1B	139.703	1.05777	0.267643	3.95217	7.74445e-05	0.000584104
LIT_MM_MAHERALI_2D4IPS-CELL_ES_MEF_DIFF	E230016M11RIK	15.0436	1.05834	0.291899	3.62569	0.000288194	0.00163881
LIT_MM_SHETH_PAM2_TUMOR_LIVER_TXNIP-DEFICIENT_DIFF	UAP1L1	190.851	1.05926	0.20201	5.24363	1.57451e-07	4.57437e-06
LIT_MM_BAUER_ENZYMES_SAM-CYCLE_METHYL_DIFF	NNMT	39.1602	1.05985	0.415356	2.55167	0.0107209	0.0297276
LIT_MM_BAUER_ENZYMES_UREA-CYCLE_AMINO-ACID_METABOLISM_DIFF	CAR1	14.7324	1.06092	0.294227	3.6058	0.00031119	0.00174218
LIT_MM_MASSARO_CALORIE_VS_AD-LIBITUM_48H_UP	CEBPB	1723	1.06251	0.211427	5.02542	5.02326e-07	1.12142e-05
LIT_MM_SPACH_CNS_EAE_DN	H2AFJ	401.225	1.06318	0.171202	6.21008	5.2957e-10	4.97642e-08
LIT_MM_TABIBIAZAR_VASCULAR-WALL_VASCULAR_C57_UP	MTHFD1L	27.4495	1.06411	0.345893	3.07641	0.00209513	0.00792686
LIT_MM_EAVES_IDD9_VS_NOD_THYMUS_UP	UBXN11	27.6826	1.06521	0.249682	4.26628	1.9876e-05	0.000196969
LIT_MM_ANISIMOV_P19-EC-CELL_SAGE-CATALOGS_DIFF	RPS12	3387.47	1.06526	0.206196	5.16627	2.38817e-07	6.35913e-06
LIT_MM_BERGER_DIETARY-LC-PUFAS_HIPPOCAMPUS_DIFF	ID1	324.318	1.06583	0.225303	4.73067	2.23778e-06	3.66828e-05
LIT_MM_MAJUMDER_RAPAMYCIN-INHIBITOR_DIFF	NT5C	118.266	1.06668	0.198006	5.38711	7.16009e-08	2.43127e-06
LIT_MM_BERGER_DIETARY-LC-PUFAS_LIVER_DIFF	THRSP	342.617	1.06718	0.286409	3.72606	0.000194498	0.00120221
LIT_MM_IACOBAS_CX43-NULL-ASTROCYTES_MOST-VARIABLY_DIFF	RPL36A	1383.78	1.06738	0.203686	5.24032	1.60295e-07	4.62652e-06
LIT_MM_HOFFMANN_B-CELL_LYMPHOCYTE_C7_DIFF	ASF1B	13.7314	1.0683	0.379419	2.81563	0.00486823	0.0156556
LIT_MM_GALINDO_ISO_HEART_UP	GM10638	33.2595	1.06879	0.321737	3.32194	0.000893953	0.00401249
LIT_MM_DIVINA_GERMINAL-CELL_DN	NME5	14.3283	1.06896	0.3153	3.39028	0.000698214	0.00329881
LIT_MM_MILLIEN_T1-ALPHA_LUNG_TERM_UP	RPL39	671.388	1.07143	0.22059	4.85709	1.19121e-06	2.244e-05
LIT_MM_HOFFMANN_T-CELL_LYMPHOCYTE_C16_DIFF	H2-K1	3225	1.07169	0.208411	5.14219	2.71549e-07	7.03373e-06
LIT_MM_MILLIEN_T1-ALPHA_LUNG_E18.5_UP	FAM110A	88.1255	1.07216	0.27061	3.962	7.43238e-05	0.000565848
LIT_MM_CSISZAR_CYTOKINE-CHEMOKINE_CORONARY-ARTERIES_DIFF	CXCR5	24.8447	1.0745	0.308236	3.48598	0.000490342	0.00249424
LIT_MM_ZENG_1-CELL-TRANSIENT_PREIMPLANTATION_DIFF	E2F2	194.893	1.07637	0.225862	4.76562	1.88278e-06	3.2033e-05
LIT_MM_TSENG_16-W-MDX_GASTROCNEMIUS-MUSCLE_UP	S100A13	250.627	1.07862	0.251006	4.29717	1.72995e-05	0.000177983
LIT_MM_TOMCZAK_MYOGENIC_2D_C3_DIFF	SCX	223.15	1.07953	0.19596	5.50893	3.61015e-08	1.42154e-06
LIT_MM_EDWARDS_CD4_VS_CD8ALPHA_UP	IFI27L2A	117.363	1.08031	0.427358	2.52788	0.0114753	0.0314098
LIT_MM_SUSZTAK_STZ-TREATED_C57BL6-MICE_DIFF	AK4	90.0269	1.08134	0.179297	6.031	1.62951e-09	1.24235e-07
LIT_MM_TURK_INBRED-STRAIN_DIFF	TUBA1C	52.0269	1.08279	0.291224	3.71805	0.000200767	0.00123337
LIT_MM_NORMAN_ADULT-CORNEA-TAG-COUNT_NOT-NORMALIZED_UP	CST6	601.137	1.08365	0.183264	5.91304	3.35841e-09	2.14842e-07
LIT_MM_EDWARDS_CD4_VS_CD8ALPHA_DN	KCNN4	24.6324	1.08411	0.323292	3.35335	0.000798409	0.0036661
LIT_MM_PULIPPARACHARUVIL_MEF2_UP	DUPD1	1443.14	1.0844	0.308318	3.51714	0.000436216	0.00227364
LIT_MM_TURK_INBRED-STRAIN_DIFF	TCAP	84692.2	1.08463	0.178797	6.0663	1.30888e-09	1.04214e-07
LIT_MM_MIJALSKI_16DUAL-COLOR_HYBRIDIZATIONS_LIVER_UP	FETUB	8.81214	1.08529	0.437369	2.4814	0.0130867	0.0348986
MSIGDB_MM_BERENJENO_TRANSFORMED_BY_RHOA_UP	CCDC99	7.76232	1.0854	0.444854	2.4399	0.0146915	0.03843
LIT_MM_TURK_INBRED-STRAIN_DIFF	CYP46A1	11.4103	1.08796	0.345162	3.15202	0.00162143	0.00647729
LIT_MM_TOMCZAK_MYOGENIC_2D_C1_DIFF	SNHG1	134.87	1.08821	0.180644	6.02403	1.70122e-09	1.2849e-07
LIT_MM_EDWARDS_CD4_VS_CD8ALPHA_UP	DDIT4	348.381	1.08988	0.234158	4.65445	3.24843e-06	4.89323e-05
LIT_MM_ZAKIN_OTX22Y2_GASTRULATING-EMBRYO_UP	2410006H16RIK	160.111	1.08998	0.238815	4.56409	5.0166e-06	6.85985e-05
LIT_MM_SHETH_PAM1_TUMOR_LIVER_TXNIP-DEFICIENT_DIFF	SIDT1	11.3487	1.08998	0.41452	2.6295	0.00855113	0.0247293
LIT_MM_BYSTRYKH_TRANS_HEMATOPOIETIC-STEM-CELL-TRANSCRIPT_DIFF	NR2C2AP	16.234	1.08999	0.318564	3.42158	0.000622578	0.00300559
LIT_MM_ANISIMOV_P19-EC-CELL_SAGE-CATALOGS_DIFF	RPS27A	2979.92	1.09043	0.195818	5.56858	2.56826e-08	1.07669e-06
LIT_MM_COSTOYA_BV2_ZFP145-PLUS_VS_ZFP145-MINUS_UP	2010107G23RIK	52.3262	1.09178	0.204025	5.35118	8.73806e-08	2.87644e-06
LIT_MM_MILENKOVIC_HESPERIDINE_UP	TPPP2	11.7531	1.09387	0.319098	3.428	0.000608052	0.0029539
LIT_MM_APRIL_MELAN_IMPOVERISHED_DN	FBXL22	159.264	1.09652	0.224591	4.88228	1.04867e-06	2.01781e-05
LIT_MM_MAEKAWA_INHIBITION-JNK_INSENSITIVE-INHIBITION-ERK_DIFF	PLB1	21.4653	1.09762	0.238517	4.60183	4.18789e-06	6.01679e-05
LIT_MM_HOFFMANN_B-CELL_LYMPHOCYTE_C9_DIFF	HES6	238.161	1.09808	0.219996	4.99137	5.99512e-07	1.30592e-05
LIT_MM_LEE_C4_GD-MODEL_DOPAMINERGIC-NEURON_ESC_DIFF	LGI1	7.45275	1.09833	0.376756	2.91522	0.00355433	0.0121584
LIT_MM_RIVOLTA_COCHLEAR_HAIR_DAY9_UP	ID2	131.332	1.10013	0.250801	4.38645	1.15214e-05	0.00012968
LIT_MM_SHAROVA_CORRELATED-PC3_EGC_VS_ESC_DIFF	2810001G20RIK	58.9059	1.10172	0.314237	3.506	0.000454901	0.00235282
LIT_MM_ROUSSEL_CORTEX_21M_4M_UP	CLEC12A	28.8202	1.10178	0.42349	2.60167	0.00927708	0.0264128
LIT_MM_HOFFMANN_B-CELL_LYMPHOCYTE_C4_DIFF	BC002163	23.4064	1.10231	0.323365	3.40888	0.000652308	0.00311746
LIT_MM_RIVOLTA_COCHLEAR_HAIR_DAY2_UP	CEBPD	553.294	1.1028	0.350948	3.14235	0.00167598	0.00665736
LIT_MM_DIVINA_GERMINAL-CELL_DN	3110070M22RIK	5.24672	1.10292	0.464303	2.37542	0.0175288	0.0442893
LIT_MM_REDDY_GLUCOCORTICOID_CIRCADIAN_LIVER_DIFF	ASL	166.613	1.10301	0.156258	7.05887	1.67865e-12	4.04956e-10
LIT_MM_GIAMBONINI-BRUGNOLI_G5_PMP22KO_PMP22TG_TREMBLER_P60_DIFF	1190005I06RIK	18.0966	1.10302	0.313267	3.52103	0.000429872	0.00224928
LIT_MM_ZHU_LPS_IFN-2_MA_PGE2_ISO_DIFF	GPR132	11.3073	1.10495	0.367783	3.00434	0.00266156	0.00959599
LIT_MM_TURK_HINDLIMB-MUSCLE_DYSTROPHIN-DEFICIENT_DIFF	TSSK1	7.14048	1.10849	0.39131	2.83276	0.00461473	0.0149835
LIT_MM_LECLERC_APCMIN_VS_TUMOR_DIFF	AKR1B8	62.5504	1.11028	0.312998	3.54724	0.000389294	0.00207936
LIT_MM_SPACH_CNS_1-25-OH-2D3_DN	FXYD7	25.2958	1.11105	0.309045	3.59512	0.00032424	0.00180031
LIT_MM_HOFFMANN_LARGE_VS_SMALL-PRE-BII-CELL_DIFF	CYBA	193.687	1.11185	0.362826	3.06441	0.00218097	0.00817375
LIT_MM_LINDSLEY_D6_DKK-PLUS_VS_DKK_DN	SLITRK5	7.32115	1.11239	0.474704	2.34333	0.0191126	0.0474891
LIT_MM_FRIES_STRAIN_AGE-X-STRAIN_FUNCTIONAL-CLUSTER_UP	PNMT	25.2928	1.11592	0.265546	4.20236	2.64149e-05	0.000247546
LIT_MM_VOKES_SHH-RESPONSE_LIMB-GLI-TARGET_SHHMUT-L_DIFF	A530013C23RIK	93.3083	1.11728	0.211227	5.28947	1.22671e-07	3.75768e-06
LIT_MM_ANISIMOV_P19-EC-CELL_SAGE-CATALOGS_DIFF	FAU	2505.57	1.11928	0.21011	5.32711	9.97894e-08	3.19385e-06
LIT_MM_TOMCZAK_MYOGENIC_2D_C3_DIFF	HSPB3	579.706	1.12064	0.174273	6.4304	1.27273e-10	1.57031e-08
LIT_MM_CHEN_TE18.5C_VS_E14.5C_KIDNEY_UP	TMEM178	21.3243	1.12113	0.268442	4.17642	2.96129e-05	0.000269349
LIT_MM_MIJALSKI_16DUAL-COLOR_HYBRIDIZATIONS_KIDNEY_UP	RPS21	3523.76	1.12504	0.213588	5.26732	1.38433e-07	4.13583e-06
LIT_MM_BUCHSTALLER_C3_E12_E14_UP	DDT	379.268	1.12605	0.216608	5.19855	2.00853e-07	5.57564e-06
LIT_MM_HU_ESCELL_TRIM28_TARGET_DIFF	SEL1L2	6.8941	1.12664	0.480312	2.34564	0.0189944	0.0472245
LIT_MM_CHEN_TE18.5C_VS_E14.5C_KIDNEY_UP	CLEC18A	16.572	1.12723	0.369259	3.05268	0.00226806	0.00841206
LIT_MM_PORTER_MDX_HINDLIMB_MUSCLE_DIFF	TSPO	550.694	1.13064	0.199217	5.67542	1.3835e-08	6.52387e-07
LIT_MM_LIANG_TG-HQK_MUSCLE_DOXYCYCLINE_14D_UP	RMRP	9.47686	1.13129	0.412072	2.74536	0.00604439	0.0186972
LIT_MM_MAJUMDER_RAPAMYCIN-INHIBITOR_DIFF	BOLA2	335.799	1.13499	0.207355	5.47367	4.40816e-08	1.65311e-06
LIT_MM_HASTON_B6_BLEOMYCIN-TREATED_C3H_DIFF	3632451O06RIK	173.286	1.14154	0.184137	6.19943	5.66697e-10	5.26409e-08
LIT_MM_HOFFMANN_PRE-BI_VS_SMALL-PRE-BII-CELL_DIFF	MCM10	7.25348	1.14418	0.391402	2.9233	0.00346347	0.0119031
LIT_MM_ANISIMOV_P19-EC-CELL_SAGE-CATALOGS_DIFF	RPL13A	7462.94	1.14491	0.187656	6.10108	1.05355e-09	8.76255e-08
LIT_MM_TOMCZAK_MYOGENIC_2D_C4_DIFF	SNHG8	293.12	1.14673	0.254396	4.50766	6.55479e-06	8.40167e-05
LIT_MM_MEHRABIAN_LIVER_BXD-CROSS_ALOX5-LOCUS_DIFF	PRR15	11.6337	1.14681	0.403907	2.83928	0.00452152	0.0147307
LIT_MM_HASTON_B6_BLEOMYCIN-TREATED_C3H_DIFF	CCDC104	274.406	1.14823	0.132581	8.66054	4.69533e-18	4.74316e-15
LIT_MM_TURK_SEVERELY-AFFECTED_VS_LMILDLY-OR-NON-AFFECTED_UP	SNHG3	233.532	1.14917	0.237211	4.84451	1.26925e-06	2.34768e-05
LIT_MM_EDWARDS_CD4_VS_CD8ALPHA_DN	AIF1	22.6529	1.14987	0.442467	2.59878	0.00935557	0.0266009
LIT_MM_ANISIMOV_P19-EC-CELL_SAGE-CATALOGS_DIFF	RPS20	4995.37	1.15359	0.189987	6.07195	1.26369e-09	1.01617e-07
LIT_MM_FERTUCK_RNA_PROTEIN-SYNTHESIS-MODIFICATION_DIFF	CSTB	207.621	1.1554	0.225733	5.11845	3.0806e-07	7.74367e-06
LIT_MM_FERTUCK_APOPTOTIC_OTHER-SIGNALING-RESPONSE_DIFF	RASD1	24.8726	1.1555	0.309339	3.7354	0.00018742	0.00117322
LIT_MM_KEEN_ROSIGLITAZONE_DN	GMFG	20.911	1.16401	0.423873	2.74613	0.00603035	0.0186614
LIT_MM_ZHU_LBP_LP_DIFF	DCXR	207.396	1.16678	0.184926	6.30946	2.80012e-10	2.93886e-08
LIT_MM_ANISIMOV_P19-EC-CELL_SAGE-CATALOGS_DIFF	RPL38	1162.88	1.16717	0.205091	5.69101	1.26293e-08	6.167e-07
LIT_MM_ZHU_LBP_LP_DIFF	UPP1	12.8625	1.16777	0.387906	3.01044	0.00260866	0.00943894
LIT_MM_HOFFMANN_B-CELL_LYMPHOCYTE_C19_DIFF	RPL12	3997.55	1.16818	0.19405	6.01996	1.74456e-09	1.30544e-07
LIT_MM_PORTER_DIAPHRAGM_VS_HINDLIMB-MUSCLE_DIFF	FHL2	27.5633	1.16894	0.403419	2.89758	0.00376049	0.0127077
LIT_MM_MEYER_LOW-PHOSPHATE-DIET_NORMAL-MICE_UP	CHKB	11.6666	1.17069	0.334248	3.50246	0.000460991	0.00237671
LIT_MM_OSHAUGHNESSY_10-F_ADULT-TESTIS_DIFF	GLUL	5339.94	1.17096	0.232986	5.02587	5.01164e-07	1.12038e-05
LIT_MM_BJORKBACKA_AORTAS-MYD88_APOE-MICE_DIFF	LY96	12.8554	1.17433	0.41575	2.82461	0.00473378	0.0152994
LIT_MM_ANDRES-AGUAYO_MSI2_LSK_UP	GM6402	8.56486	1.17471	0.381178	3.0818	0.00205751	0.00781809
LIT_MM_TOMCZAK_MYOGENIC_2D_C3_DIFF	TNNC1	80.1402	1.17482	0.282062	4.1651	3.11217e-05	0.00028086
LIT_MM_HASTON_B6_BLEOMYCIN-TREATED_C3H_DIFF	LRAT	6.86498	1.17502	0.505605	2.32399	0.0201259	0.0495499
LIT_MM_HOUSE_EPIDIDYMAL-ADIPOSE_14D_FACTOR_DIFF	1700011J10RIK	28.772	1.17657	0.30761	3.82487	0.000130842	0.000889753
LIT_MM_LANG_SOCS3_VS_MACROPHAGES_400TREATMENT_IL-6_UP	IRF7	119.55	1.17849	0.249731	4.71903	2.36972e-06	3.82282e-05
LIT_MM_LEE_HUNTINGTIN_POLYGLUTAMINE-TRACT_STRIATAL-CELL_DN	CCDC122	75.2016	1.17866	0.214255	5.5012	3.77223e-08	1.47628e-06
LIT_MM_HOFFMANN_LARGE_VS_SMALL-PRE-BII-CELL_DIFF	LAT2	38.5558	1.17944	0.385266	3.06136	0.00220332	0.00822995
LIT_MM_EDWARDS_CD4_VS_CD8ALPHA_UP	GADD45G	1212.6	1.18032	0.23491	5.02455	5.04625e-07	1.125e-05
LIT_MM_VASSENA_SCNT_VS_FERTILIZED-EMBRYOS_2-STAGE_UP	SPDYA	7.07086	1.18149	0.443366	2.66482	0.00770305	0.0227032
LIT_MM_TOMCZAK_MYOGENIC_2D_C3_DIFF	FGFBP1	42.0804	1.18416	0.397206	2.98123	0.0028709	0.0101983
LIT_MM_FANG_LACRIMAL-GLAND_CORNEAL-TRAUMA-TWICE_DIFF	GALE	17.3367	1.18481	0.316262	3.7463	0.000179464	0.00113663
LIT_MM_WELLS_LPS-INDUCIBLE_BALB-C_C3H-ARC_NOT-C3H-HEJ-STRAIN_DIFF	H2-Q10	15.1437	1.18586	0.464159	2.55485	0.0106232	0.0295126
LIT_MM_ZHU_LPS_IFN-2_MA_PGE2_ISO_DIFF	XCR1	14.8792	1.18744	0.411666	2.88447	0.00392077	0.0131558
LIT_MM_CAHAN_CNVR-EQTLS_ADIPOSE-HEMATOPOIETIC-HYPOTHALAMUS_DIFF	GM5111	13.4619	1.18745	0.398891	2.97687	0.00291204	0.010323
LIT_MM_YAO_6HP4_KO_VS_SAM_UP	SERTAD1	205.248	1.18785	0.208869	5.68704	1.29258e-08	6.24556e-07
LIT_MM_HOFFMANN_PRE-BI_VS_LARGE-PRE-BII-CELL_DIFF	MGST2	6.7725	1.18916	0.46399	2.56289	0.0103804	0.0289609
LIT_MM_HOLLOWAY_LIVER_HNF4A-DEPEND_SEX-SPECIFIC_DIFF	OLFR1372-PS1	12.2208	1.19039	0.317763	3.74617	0.000179556	0.00113677
LIT_MM_DIVINA_TOTAL-TESTIS_PEM-1-2PEMTT_MAPPED_DIFF	FBXL13	5.7053	1.19062	0.487037	2.44461	0.0145009	0.0380051
LIT_MM_HOFFMANN_PRE-BI_VS_SMALL-PRE-BII-CELL_DIFF	CDCA3	23.4158	1.19089	0.396218	3.00565	0.00265012	0.00956281
LIT_MM_TOMCZAK_MYOGENIC_2D_C2_DIFF	LRRN3	11.1669	1.19179	0.338641	3.51934	0.000432618	0.00225986
LIT_MM_TOMCZAK_MYOGENIC_2D_C2_DIFF	RAB13	251.642	1.19244	0.23577	5.05764	4.24479e-07	9.84341e-06
LIT_MM_PORTER_MDX_VS_DIAPHRAGMA_DIFF	AMY1	1552.08	1.19282	0.133041	8.96582	3.07975e-19	4.52527e-16
LIT_MM_LANG_SOCS3_VS_MACROPHAGES_400TREATMENT_IL-6_DN	HPGD	101.839	1.19548	0.508622	2.35042	0.0187522	0.0467445
LIT_MM_RIVOLTA_COCHLEAR_HAIR_DAY4_UP	GSTM2	1140.76	1.1977	0.145947	8.20641	2.27896e-16	1.60152e-13
LIT_MM_MIJALSKI_16DUAL-COLOR_HYBRIDIZATIONS_KIDNEY_UP	TMEM8	61.6322	1.19805	0.193301	6.19784	5.72443e-10	5.28708e-08
LIT_MM_HAGEMANN_GFAP-TRANSGENIC-MICE_DIFF	GABRD	17.6424	1.20057	0.255478	4.69931	2.61037e-06	4.11624e-05
LIT_MM_KEEN_ROSIGLITAZONE_UP	ARXES2	6.12021	1.20107	0.48998	2.45126	0.0142358	0.0374378
LIT_MM_TOMCZAK_MYOGENIC_2D_C4_DIFF	2610019E17RIK	9.70571	1.20118	0.401036	2.9952	0.00274267	0.00983794
LIT_MM_RIVOLTA_COCHLEAR_HAIR_DAY2_DN	PSMB9	116.76	1.20194	0.335474	3.58282	0.000339902	0.00186675
LIT_MM_BROWN_NORMAL_VS_MA-BRAIN_DIFF	PGLYRP1	7.23569	1.20316	0.517925	2.32304	0.0201768	0.0496223
LIT_MM_CAHOY_OLIGODENDROCYTES-SPECIFIC_UP	GOLGA7B	136.034	1.20521	0.195071	6.17832	6.4789e-10	5.85019e-08
LIT_MM_MCCABE_WTPRE_VS_RB-PRE-CELL_SERUM_DN	CYR61	1345.7	1.20679	0.140726	8.57547	9.86811e-18	8.86102e-15
LIT_MM_SCHULZ_LEPTIN_TROPHOBLAST-CELL_1H_UP	4933408B17RIK	6.66201	1.20714	0.414447	2.91265	0.00358372	0.0122305
LIT_MM_LI_CO2_NEONATAL_LUNG_DN	AMICA1	7.87709	1.20852	0.392419	3.07966	0.00207237	0.00785917
LIT_MM_BALBIR_AJ_VS_DBA_UP	FAM196B	27.823	1.21065	0.241141	5.02053	5.15303e-07	1.1425e-05
LIT_MM_BERGER_DIETARY-LC-PUFAS_LIVER_DIFF	CYP1A1	40.1088	1.21147	0.240237	5.0428	4.58766e-07	1.03998e-05
GENESIGDB_MM_LINDMARK_04_STEM_CELL	3110003A17RIK	52.376	1.21169	0.308009	3.93396	8.35589e-05	0.000620378
LIT_MM_ZHU_LPS_IFN-2_MA_PGE2_ISO_DIFF	IFITM5	5.70723	1.21368	0.472007	2.57132	0.0101312	0.0284093
LIT_MM_DIVINA_TOTAL-TESTIS-SOMATIC-CELL_PEM-1-2PEMTT_MAPPED_DIFF	CCDC11	5.90748	1.21404	0.467067	2.59929	0.00934174	0.0265735
LIT_MM_MILLER_6D-GFP-CELL_D0-D4-D6-GFP-CELL_FDR0.05_UP	KCNG2	4.78062	1.21557	0.48558	2.50333	0.0123032	0.0332093
LIT_MM_HOFFMANN_T-CELL_LYMPHOCYTE_C17_DIFF	OAS1A	18.1848	1.22043	0.419267	2.91087	0.0036042	0.0122766
LIT_MM_YAO_BDF1-MOUSE_TESTIS_FUNCTION_DIFF	C1QTNF4	317.507	1.22112	0.272782	4.47653	7.58647e-06	9.38898e-05
LIT_MM_ZHU_LPS_IFN-2_MA_PGE2_ISO_DIFF	ARRDC2	1073.5	1.22175	0.455383	2.68291	0.00729851	0.0217208
LIT_MM_EDWARDS_CD4_VS_CD8ALPHA_UP	IFITM6	7.39065	1.22292	0.501183	2.44006	0.0146846	0.0384182
LIT_MM_ENG_DRG_BRN3A-KNOCKOUT-MICE_DN	RTN4RL2	16.3806	1.22551	0.354495	3.45707	0.00054609	0.00272311
LIT_MM_EDWARDS_CD4_VS_CD8ALPHA_UP	IER3	209.214	1.22717	0.15131	8.11033	5.04808e-16	3.13816e-13
LIT_MM_RIVOLTA_COCHLEAR_HAIR_DAY2_DN	IGTP	448.882	1.22809	0.272745	4.50269	6.70984e-06	8.56644e-05
LIT_MM_PORTER_MDX_HINDLIMB_MUSCLE_DIFF	2610002J02RIK	71.4035	1.22944	0.212829	5.77663	7.62108e-09	4.06533e-07
LIT_MM_GARCIA-ORTIZ_NEWBORN-OVARY_NOBOX-NULL_UP	TMSB15B1	7.58106	1.22959	0.403699	3.0458	0.00232061	0.00857129
LIT_MM_RIVERA-FELICIANO_GATA4T2DEL-AVC_UP	5031426D15RIK	31.783	1.22963	0.391146	3.14366	0.00166851	0.00663471
LIT_MM_MAJUMDER_RAPAMYCIN-INHIBITOR_DIFF	PAK1	845.255	1.23399	0.216955	5.68777	1.28707e-08	6.24556e-07
LIT_MM_BECKERS_ERBB2_NIH3T3-CELL_UP	SOX9	69.7232	1.23698	0.266108	4.64843	3.34471e-06	4.99601e-05
LIT_MM_MAJUMDER_RAPAMYCIN-INHIBITOR_DIFF	KCNK5	49.4161	1.23887	0.398361	3.10991	0.00187143	0.0072764
LIT_MM_MCCABE_WTPRE_VS_RB-PRE-CELL_SERUM_DN	RHPN2	79.6496	1.2404	0.26192	4.7358	2.18194e-06	3.58766e-05
LIT_MM_ZENG_MATERNAL_PREIMPLANTATION_DIFF	CAGE1	8.35082	1.24058	0.509465	2.43506	0.0148892	0.0388339
LIT_MM_LAFFAIRE_TS1CJE_EUPLOID_CEREBELLUM_P3_UP	BC049352	28.5738	1.24923	0.434204	2.87706	0.00401395	0.0133823
LIT_MM_HOFFMANN_PRE-BI_VS_SMALL-PRE-BII-CELL_DIFF	E2F8	5.98961	1.25041	0.510036	2.45162	0.0142215	0.0374125
LIT_MM_HOFFMANN_T-CELL_LYMPHOCYTE_C16_DIFF	IFIT1	94.0597	1.25363	0.290425	4.31654	1.58495e-05	0.000165843
LIT_MM_KIM_C10-CONGENIC-LINE_VS_A_J_P56-HIPPOCAMPI_UP	STK32C	8.96265	1.256	0.42909	2.92713	0.00342107	0.0117874
LIT_MM_RENTHAL_COCAINE-HDAC5KO_COCAINE_DN	OSTN	320.157	1.2615	0.232581	5.42392	5.83064e-08	2.10359e-06
LIT_MM_GOFFARD_THYROID-TRANSGENIC_ADENOSINE-RECEPTOR_UP	CTLA2A	275.241	1.2639	0.260362	4.85441	1.20747e-06	2.26408e-05
LIT_MM_MITIKU_POSTIMPLANTATION-EMBRYOGENEIS_E7.5-E7.75_UP	1700012D01RIK	13.1903	1.26394	0.33633	3.75804	0.000171249	0.00109317
LIT_MM_GEORGAS_KIDNEY_TS20-21_EARLY-TUBULE_DIFF	CTXN3	1178.13	1.27295	0.202802	6.2768	3.45603e-10	3.44813e-08
LIT_MM_RIVOLTA_COCHLEAR_HAIR_DAY4_UP	GSTA3	21.1287	1.2742	0.459002	2.77602	0.00550291	0.0172706
LIT_MM_AMANO_TRISOMIC-REGION_DOWN-SYNDROME_UP	2810008D09RIK	160.483	1.27492	0.221695	5.75078	8.88337e-09	4.63896e-07
LIT_MM_DIVINA_TOTAL-TESTIS_PEM-1-2PEMTT_MAPPED_DIFF	PTPN7	11.4016	1.27676	0.471969	2.70517	0.00682695	0.0205215
LIT_MM_MIJALSKI_16DUAL-COLOR_HYBRIDIZATIONS_KIDNEY_UP	BEND5	14.4105	1.27902	0.297382	4.30094	1.70075e-05	0.000175538
LIT_MM_EDWARDS_CD4_VS_CD8ALPHA_DN	MYCL1	9.6053	1.28205	0.522291	2.45466	0.0141017	0.0371578
LIT_MM_BUCHSTALLER_C3_E12_E14_UP	GP49A	34.8776	1.28221	0.441939	2.90133	0.00371579	0.0125803
LIT_MM_ZHU_LPS_IFN-2_MA_PGE2_ISO_DIFF	RASSF7	9.35955	1.28471	0.461975	2.78091	0.00542063	0.0170554
LIT_MM_TURK_INBRED-STRAIN_DIFF	PTPN18	57.0526	1.28631	0.316961	4.05826	4.94402e-05	0.000407878
LIT_MM_MACKIEWICZ_C2_CEREBRAL-CORTEX_SLEEP_UP	2810029C07RIK	11.5742	1.28794	0.367872	3.50105	0.000463427	0.00238775
LIT_MM_SPACH_CNS_EAE_UP	ADORA1	23.2954	1.29071	0.422386	3.05576	0.00224489	0.00834695
LIT_MM_BUCHSTALLER_C3_E12_E14_UP	TNNT2	142.09	1.2925	0.299304	4.31835	1.572e-05	0.000165096
LIT_MM_SUSZTAK_MESANGIAL-MATRIX_VS_MINIMALMESANGIAL_DIFF	8430408G22RIK	190.998	1.29431	0.273828	4.72671	2.28182e-06	3.72159e-05
LIT_MM_RIVOLTA_COCHLEAR_HAIR_DAY2_DN	GBP3	245.362	1.2966	0.373596	3.4706	0.000519302	0.00261479
LIT_MM_YAO_29M-BDF1-MICE_TESTIS_DN	1700112E06RIK	46.0433	1.29701	0.198244	6.54249	6.05019e-11	8.81043e-09
LIT_MM_RENTHAL_COCAINE-HDAC5KO_SALINE-HDAC5KO_UP	CDHR3	26.3577	1.29785	0.291768	4.44822	8.65865e-06	0.000104505
LIT_MM_DEROO_TGF_D2E-MAMMARY-GLAND_DN	SH2D4A	95.403	1.29801	0.349668	3.71213	0.000205525	0.00125497
LIT_MM_ANISIMOV_P19-EC-CELL_SAGE-CATALOGS_DIFF	RPL3	1265.56	1.30029	0.217393	5.9813	2.2137e-09	1.5693e-07
LIT_MM_MIJALSKI_16DUAL-COLOR_HYBRIDIZATIONS_LIVER_UP	ACOX2	7.46122	1.30522	0.422283	3.09085	0.00199583	0.00763338
LIT_MM_ENG_DRG_BRN3A-KNOCKOUT-MICE_DN	PRRXL1	13.2978	1.31068	0.435021	3.01291	0.00258752	0.00937714
LIT_MM_PULIPPARACHARUVIL_MEF2_UP	OLFR920	9.44669	1.3152	0.388855	3.38222	0.000719016	0.00337735
LIT_MM_NOJIRI_NR-S1_SCCVII_GAMMA-IRRADIATION_DIFF	XRRA1	4.53594	1.32168	0.553747	2.38679	0.0169964	0.0431847
LIT_MM_EAVES_IDD9_VS_NOD_SPLEEN_DN	CDT1	19.0683	1.32189	0.348555	3.7925	0.000149136	0.00098329
LIT_MM_EAVES_IDD3-5_VS_NOD_THYMUS_DN	CAR3	96758	1.32361	0.173335	7.63614	2.23833e-14	9.04454e-12
LIT_MM_ATTANASIO_GLIS2-MUTANT_KIDNEY_UP	WDR86	5.60536	1.32727	0.499972	2.65469	0.00793813	0.0232519
LIT_MM_LIADAKI_BONE-MARROW_SIDE-POPULATION_VS_MAIN-POPULATION_UP	MDFI	55.1693	1.32822	0.415894	3.19366	0.00140483	0.00578062
LIT_MM_SHETH_PAM1_TUMOR_LIVER_TXNIP-DEFICIENT_DIFF	NKAPL	7.42481	1.32827	0.432673	3.06991	0.00214123	0.00806728
LOC_MM_CHR4_E1	RPS19-PS3	11.983	1.33	0.395661	3.36147	0.000775274	0.00358407
LIT_MM_YANG_BL6_SPRETUS-SNPS-IN-TRANSCRIPTS_X-CHROMOSOME_PATSKICELL_DIFF	FRMPD4	3.82337	1.33137	0.545168	2.44212	0.0146012	0.0382308
LIT_MM_MOLOFSKY_BMI-1_NEUROSPHERES-CULTURED_UP	PMAIP1	5.7089	1.33229	0.537864	2.477	0.0132491	0.0352793
LIT_MM_HOFFMANN_B-CELL_LYMPHOCYTE_C12_DIFF	PSMG4	144.195	1.33233	0.205596	6.48034	9.1518e-11	1.21794e-08
LIT_MM_HALDAR_SYT-SSX_UP	9330133O14RIK	59.8856	1.337	0.359031	3.72391	0.000196161	0.00120967
LIT_MM_LANG_SOCS3_VS_MACROPHAGES_100TREATMENT_IL-6_UP	CCL12	6.53887	1.33795	0.525626	2.54544	0.0109139	0.0301438
LIT_MM_SUGINO_MEMBER-ANOVA_FAMILY_NEURONAL_FOREBRAIN_DIFF	DIRAS1	6.10933	1.33896	0.538046	2.48857	0.0128258	0.0343901
LIT_MM_YAO_6HP4_KO_VS_SAM_UP	CFD	887.074	1.34018	0.569776	2.35211	0.0186671	0.0465756
LIT_MM_DIVINA_TESTIS-SOMATIC-CELL_UP	GSTM7	60.258	1.34045	0.233102	5.75051	8.89735e-09	4.63896e-07
LIT_MM_WELLS_MACROPHAGE_RIKEN-CLONE_FANTOM_DIFF	MS4A6C	50.8562	1.34091	0.492386	2.7233	0.00646343	0.0196924
LIT_MM_KITAMURA_TOTAL-CELLULAR-FRACTION_LPS-TREATMENT_DN	G530011O06RIK	10.6602	1.34201	0.404623	3.3167	0.000910861	0.00407367
LIT_MM_TOMCZAK_MYOGENIC_2D_C3_DIFF	TNNI1	125.104	1.34319	0.4247	3.16267	0.00156327	0.00628848
LIT_MM_TOMCZAK_MYOGENIC_2D_C2_DIFF	G0S2	642.149	1.3441	0.446502	3.01028	0.00261009	0.009442
LIT_MM_ZHU_LBP_LP_DIFF	SPATA24	77.6553	1.34494	0.224938	5.97914	2.24318e-09	1.58325e-07
LIT_MM_VON-DER-HAGEN_SIGNIFICANT-REGULATED-TRANSCRIPT_DIFF	HSPB7	10211.9	1.3492	0.279495	4.82728	1.38414e-06	2.50524e-05
LIT_MM_FANG_LACRIMAL-GLAND_CORNEAL-TRAUMA-TWICE_DIFF	TESC	17.1536	1.35333	0.350503	3.86112	0.00011287	0.000791459
LIT_MM_GERRITS_PRINCIPAL-EQTL_MYELOID-SPECIFIC-EQTLS_DIFF	8430403D17RIK	6.87289	1.35483	0.468261	2.89331	0.003812	0.0128575
LIT_MM_HOFFMANN_B-CELL_LYMPHOCYTE_C8_DIFF	RBM3	1292.88	1.35511	0.170788	7.93446	2.11413e-15	1.1783e-12
GENESIGDB_MM_BUONOMO_11_VIRAL_1	2210403K04RIK	1077.04	1.36167	0.124072	10.9748	5.05003e-28	8.16237e-24
LIT_MM_COSTOYA_BV2_ZFP145-PLUS_VS_ZFP145-MINUS_UP	DEPDC7	88.0604	1.36182	0.135901	10.0207	1.23631e-23	4.9956e-20
LIT_MM_HOFFMANN_PRE-BI_VS_SMALL-PRE-BII-CELL_DIFF	RRM2	33.5546	1.36236	0.350673	3.88499	0.000102336	0.000731237
LIT_MM_EDWARDS_CD4_VS_CD8ALPHA_UP	TNF	4.90332	1.36477	0.540445	2.52526	0.0115612	0.0316023
LIT_MM_MIURA_E-CHAFFEENSIS-WAKULLA_LIVER-TRANSCRIPTOME_UP	APOL11B	10.8294	1.36701	0.561731	2.43357	0.0149507	0.0389505
LIT_MM_RIVERA-FELICIANO_GATA4T2DEL-AVC_UP	2310050B05RIK	756.47	1.36988	0.200776	6.82293	8.92038e-12	1.62e-09
LIT_MM_HOFFMANN_PRE-BI_VS_LARGE-PRE-BII-CELL_DIFF	EMB	93.4495	1.37098	0.436786	3.13878	0.0016965	0.00671879
LIT_MM_HEWITT_2H_INJECTED-VEHICLE-ESTREN-19NT-E2_DIFF	GGT6	7.63025	1.37285	0.482852	2.84321	0.00446613	0.014583
LIT_MM_ZHU_LPS_IFN-2_MA_PGE2_ISO_DIFF	SNX20	14.143	1.37501	0.448842	3.06346	0.00218791	0.00818875
LIT_MM_BUCHSTALLER_C5_E16_E18_P0_UP	CELF4	13.7101	1.37857	0.334321	4.1235	3.73163e-05	0.000325513
LIT_MM_KITAMURA_TPOLYSOMAL-FRACTION_LPS-TREATMENT_DN	AI662270	28.9345	1.37858	0.42853	3.21701	0.00129536	0.00540168
LIT_MM_CHEN_FOXP3-SCURFY-MUTATION_DIABETES_DN	SEMA4F	9.06039	1.38357	0.48096	2.87668	0.00401887	0.013396
LIT_MM_MEHRABIAN_LIVER_BXD-CROSS_ALOX5-LOCUS_DIFF	PRELID2	8.61087	1.38461	0.405047	3.41838	0.000629946	0.00303482
LIT_MM_FUKADA_QUIESCENT-SATELLITE-CELL_VS_SATELLITE-CELL_DN	CGREF1	49.4054	1.38781	0.363848	3.81425	0.000136596	0.000917899
LIT_MM_MIJALSKI_16DUAL-COLOR_HYBRIDIZATIONS_KIDNEY_UP	MYL12A	6687.77	1.38868	0.196623	7.06265	1.63355e-12	4.00047e-10
LIT_MM_MAHERALI_2D4IPS-CELL_ES_MEF_DIFF	ACBD7	6.9056	1.38887	0.471768	2.94396	0.00324041	0.0112682
LIT_MM_MORTON_SELF-ORGANISING-MAP_DIFF	MT1	480.869	1.38937	0.464681	2.98994	0.00279033	0.00996248
LIT_MM_KITAMURA_TOTAL-CELLULAR-FRACTION_LPS-TREATMENT_DN	2810408I11RIK	3.61553	1.39584	0.568561	2.45504	0.0140867	0.0371305
LIT_MM_SMALL_TESTIS_VS_OVARY_MURINE-EMBRYONIC-GONAD_UP	SOSTDC1	5.13512	1.39829	0.581025	2.40659	0.0161024	0.0414562
LIT_MM_GOVONI_6H_24H-GH-TREATMENT_DN	NRP	10.92	1.40029	0.430869	3.24991	0.0011544	0.0049309
LIT_MM_ZHU_LBP_LP_DIFF	SLFN1	9.39254	1.40429	0.559434	2.51019	0.0120665	0.0326903
LIT_MM_KIM_PAM3_UP	NUDT17	13.7222	1.40442	0.348453	4.03044	5.56735e-05	0.000449476
LIT_MM_LIADAKI_SIDE-POPULATION_MUSCLE_VS_BONE-MARROW_UP	SERPINB6C	3.57581	1.40872	0.576132	2.44514	0.0144797	0.0379591
LIT_MM_MEHRABIAN_LIVER_BXD-CROSS_ALOX5-LOCUS_DIFF	4833427F10RIK	12.8025	1.41494	0.423162	3.34372	0.000826636	0.00377108
LIT_MM_MIJALSKI_16DUAL-COLOR_HYBRIDIZATIONS_KIDNEY_UP	4921536K21RIK	6.12004	1.42002	0.501321	2.83256	0.00461774	0.0149903
LIT_MM_APRIL_MELAN_IMPOVERISHED_DN	2310034G01RIK	16.6281	1.42789	0.325476	4.3871	1.14874e-05	0.000129478
LIT_MM_MIJALSKI_16DUAL-COLOR_HYBRIDIZATIONS_KIDNEY_UP	CLCNKB	7.10743	1.43065	0.486591	2.94014	0.00328063	0.0113812
LIT_MM_PORTER_MEOM_MLM-MYOBLAST_DIFF	MARVELD2	25.1641	1.43218	0.305634	4.68592	2.78708e-06	4.32734e-05
LIT_MM_FERTUCK_APOPTOTIC_OTHER-SIGNALING-RESPONSE_DIFF	CRABP2	4.64384	1.43229	0.568152	2.52096	0.0117036	0.0318836
LIT_MM_HOFFMANN_T-CELL_LYMPHOCYTE_C1_DIFF	PLAUR	33.9846	1.43239	0.365288	3.92126	8.80863e-05	0.000647154
LIT_MM_EAVES_IDD3-5_VS_NOD_THYMUS_UP	ECT2	6.01554	1.43261	0.561397	2.55186	0.010715	0.0297264
LIT_MM_FANG_LACRIMAL-GLAND_CORNEAL-TRAUMA-3TIMES_DIFF	SPINT2	130.402	1.43636	0.170984	8.40054	4.44438e-17	3.42069e-14
LIT_MM_ZHU_LBP_LP_DIFF	IFI47	86.258	1.43822	0.352231	4.08317	4.44256e-05	0.000373013
LIT_MM_LIU_11KA_SPI2A_MEMORY-T-LYMPHOCYTE_DN	GM6251	3.11175	1.43961	0.598889	2.4038	0.0162256	0.0417205
LIT_MM_MISHRA_DB-DB_VS_DB-M_KIDNEYS_DIFF	GSTM6	6.85024	1.44377	0.474356	3.04364	0.00233737	0.00862531
LIT_MM_KOUADJO_MALE-SEXUAL-ORGAN_DIFF	D330050I16RIK	15.8583	1.44691	0.345272	4.19064	2.78174e-05	0.000256752
LIT_MM_DIVINA_TOTAL-TESTIS-SOMATIC-CELL_PEM-1-2PEMTT_MAPPED_DIFF	HAVCR2	4.69801	1.44924	0.615494	2.35459	0.0185429	0.046322
MSIGDB_MM_BRUINS_UVC_RESPONSE_VIA_TP53_GROUP_A	ACCN1	6.42037	1.44962	0.470472	3.08121	0.00206164	0.00782949
LIT_MM_BERGER_DIETARY-LC-PUFAS_HIPPOCAMPUS_DIFF	POMC	4.85201	1.4556	0.551512	2.63929	0.00830791	0.0241339
LIT_MM_FANG_LACRIMAL-GLAND_CORNEAL-TRAUMA-TWICE_DIFF	BST2	316.873	1.45833	0.300292	4.85638	1.19553e-06	2.24953e-05
LIT_MM_MA_E2F1_UP	GP1BB	8.82924	1.45948	0.496534	2.93933	0.00328927	0.0114087
LIT_MM_MASSARO_CALORIE_VS_AD-LIBITUM_96H_UP	MMP8	6.89062	1.46526	0.498943	2.93673	0.00331691	0.0114824
LIT_MM_DIVINA_GERMINAL-CELL_DN	1700093K21RIK	5.51554	1.466	0.454252	3.22728	0.00124972	0.00524381
LIT_MM_ZHU_LBP_LP_DIFF	NUF2	5.3735	1.46649	0.599738	2.44522	0.0144766	0.0379591
LIT_MM_SPACH_CNS_EAE_UP	CHRND	122.06	1.46737	0.625004	2.34778	0.0188858	0.0470051
LIT_MM_EDWARDS_CD4_VS_CD8ALPHA_DN	CXCR3	3.71753	1.47079	0.560125	2.62582	0.00864398	0.024922
LIT_MM_RIVOLTA_COCHLEAR_HAIR_DAY9_DN	PSMB8	289.374	1.47098	0.346844	4.24104	2.2249e-05	0.000215594
LIT_MM_VENEZIA_FETAL-LIVER_HEMATOPOIETIC-STEM-CELL_UP	NME4	53.8067	1.47153	0.23257	6.32725	2.49567e-10	2.68917e-08
LIT_MM_SHELL_LPS-STIMULATED-RAW-MACROPHAGE_UP	ZBP1	23.7365	1.48231	0.450283	3.29195	0.000994946	0.00437954
LIT_MM_HALDAR_SYT-SSX_DN	2310001K24RIK	7.20744	1.484	0.418481	3.54617	0.000390879	0.00208507
LIT_MM_GOFFARD_THYROID-TRANSGENIC_ADENOSINE-RECEPTOR_UP	KIF22	12.9463	1.48481	0.53378	2.78169	0.00540774	0.0170215
LIT_MM_SUSZTAK_DB-DB_VS_DB-M_DIFF	SNHG11	27.4264	1.48803	0.27455	5.4199	5.96326e-08	2.14664e-06
LIT_MM_ZHU_LBP_LP_DIFF	FHIT	20.268	1.4881	0.344576	4.31864	1.56991e-05	0.000164983
LIT_MM_HOFFMANN_PRE-BI_VS_SMALL-PRE-BII-CELL_DIFF	DBF4	19.4898	1.48938	0.333011	4.47247	7.73219e-06	9.53283e-05
LIT_MM_YAO_29M-BDF1-MICE_TESTIS_DN	TMEM202	9.97013	1.48996	0.437429	3.40617	0.000658807	0.0031448
LIT_MM_WELLS_LPS-INDUCIBLE_BALB-C_C3H-ARC_NOT-C3H-HEJ-STRAIN_DIFF	CALY	12.2943	1.49019	0.346204	4.30438	1.67457e-05	0.0001735
LIT_MM_RENTHAL_COCAINE-HDAC5KO_SALINE-HDAC5KO_UP	E130006D01RIK	7.4582	1.49539	0.460593	3.24666	0.00116769	0.00497848
LIT_MM_TOMCZAK_MYOGENIC_2D_C3_DIFF	MYL2	70.6028	1.50044	0.364582	4.11552	3.86308e-05	0.000333542
LIT_MM_ESTLER_MELAN-A-CELL_B16-CELL_UP	GM12060	4.12828	1.50208	0.535557	2.80472	0.00503609	0.0160898
LIT_MM_RIVOLTA_COCHLEAR_HAIR_DAY2_DN	ISG15	43.712	1.50301	0.402819	3.73123	0.000190545	0.00118727
LIT_MM_SOKOLOVIC_FASTING_INTESTINE_12H_DN	A730090N16RIK	6.39604	1.50543	0.563381	2.67213	0.00753716	0.0222964
LIT_MM_OWENS_TUMOR_VS_LUTEOMA_UP	GDNF	42.893	1.51023	0.284321	5.31172	1.08596e-07	3.42152e-06
LIT_MM_MA_SAM_UP	LAT	7.35877	1.51788	0.437685	3.46797	0.000524399	0.00263452
LIT_MM_POTIREDDY_MMRNA_LATE-1-CELL-EMBRYOS_UP	PABPC1L	7.14188	1.52261	0.419126	3.63282	0.000280345	0.00160454
LIT_MM_WELLS_MACROPHAGE_RIKEN-CLONE_FANTOM_DIFF	S100A4	294.154	1.52704	0.544188	2.8061	0.00501454	0.0160273
LIT_MM_EAVES_IDD3_VS_NOD_DN	5730408K05RIK	7.12772	1.52784	0.489551	3.1209	0.001803	0.00706128
GENESIGDB_MM_WOODRUFF_05_LUNG_NOT_CANCER_1	E130306D19RIK	6.27435	1.52883	0.480311	3.18301	0.00145754	0.00595088
LIT_MM_ESCUDERO_FOXL2-KO_E16_DIFF	RPS15A-PS6	13.4129	1.53199	0.427205	3.58608	0.000335688	0.00185115
LIT_MM_ZHU_LBP_LP_DIFF	GBP8	5.58658	1.53483	0.658179	2.33193	0.0197042	0.0486746
LIT_MM_LU_ESTROGEN-PROGESTERONE_VS_VEHICLE-TREATMENT_DIFF	BC006965	4.25031	1.53553	0.575139	2.66984	0.0075888	0.0224196
LIT_MM_TOMCZAK_MYOGENIC_2D_C4_DIFF	TTC9	218.276	1.54602	0.350777	4.40743	1.04606e-05	0.000119911
LIT_MM_EAVES_IDD5_VS_NOD_SPLEEN_UP	CDC20	13.2675	1.55652	0.462809	3.36321	0.000770421	0.00356902
LIT_MM_COVENEY_XX-WNT4-GONAD_VS_XY-WNT4_UP	BAIAP3	6.57636	1.55882	0.433379	3.59691	0.000322023	0.00179046
LIT_MM_RIVOLTA_COCHLEAR_HAIR_DAY4_DN	SPP1	54.9358	1.56077	0.418093	3.73307	0.000189161	0.00118047
LIT_MM_SCHADT_LIVER_BXD-CROSS_DIFF	GM4951	22.7736	1.56438	0.391741	3.9934	6.51313e-05	0.000509297
LIT_MM_YANG_LIVER_MALE_LPL-HETEROZYGOUS-KO_DIFF	C730002L08RIK	5.209	1.5662	0.553892	2.82762	0.00468947	0.0151835
LIT_MM_DONZE_PKR_DN	DOCK3	6.72637	1.5679	0.414001	3.7872	0.000152355	0.000999397
LIT_MM_HOFFMANN_PRE-BI_VS_LARGE-PRE-BII-CELL_DIFF	MYL4	450.429	1.57247	0.320016	4.91372	8.93644e-07	1.77009e-05
LIT_MM_COSTOYA_BV2_ZFP145-PLUS_VS_ZFP145-MINUS_UP	2010300C02RIK	57.8654	1.57252	0.259034	6.07072	1.27341e-09	1.01892e-07
LIT_MM_AVIVI_INTERACTION-GENE_OXYGEN_DIFF	4930509E16RIK	9.726	1.57385	0.383839	4.10029	4.12632e-05	0.000351728
LIT_MM_ZHU_LBP_LP_DIFF	KLRA2	4.02933	1.57622	0.555301	2.8385	0.00453263	0.0147495
LIT_MM_HOFFMANN_PRE-BI_VS_SMALL-PRE-BII-CELL_DIFF	TOP2A	28.3711	1.57805	0.555068	2.84298	0.00446939	0.0145907
LIT_MM_ZHU_LBP_LP_DIFF	PHXR4	8.36426	1.58173	0.507594	3.11612	0.00183245	0.00715752
LIT_MM_BUCHSTALLER_C1_E9.5_UP	UHRF1	10.644	1.58646	0.598186	2.65213	0.00799863	0.0233994
LIT_MM_MORTON_SELF-ORGANISING-MAP_DIFF	PPP1R1A	1142.46	1.59812	0.296066	5.39787	6.74365e-08	2.32225e-06
LIT_MM_JIANG_ESCELL_TRIPLE-RNAI_4D_UP	WDR27	3.21952	1.59852	0.622063	2.56971	0.0101784	0.0285098
LIT_MM_TOMCZAK_MYOGENIC_2D_C2_DIFF	RUNX1	193.143	1.59973	0.361206	4.42886	9.47346e-06	0.000111461
LIT_MM_MA_E2F1_UP	CNIH2	4.08937	1.60312	0.556904	2.87863	0.00399401	0.0133351
LIT_MM_BAUER_ENZYMES_SAM-CYCLE_METHYL_DIFF	GNMT	32.3654	1.60698	0.285572	5.62725	1.83109e-08	8.244e-07
LIT_MM_SPEHLMANN_C.RODENTIUM-INFECTION_UNINFECTION_COLONIC_UP	GM12250	22.7876	1.60745	0.52119	3.08418	0.00204112	0.00777349
LOC_MM_CHR10_C1	GM4925	5.3885	1.61462	0.473637	3.40899	0.000652049	0.00311746
LIT_MM_ZHU_LPS_IFN-2_MA_PGE2_ISO_DIFF	RGS11	17.9389	1.615	0.431733	3.74074	0.00018348	0.00115393
LIT_MM_HALDAR_SYT-SSX_DN	FAM196A	11.7932	1.61823	0.511146	3.16588	0.00154613	0.00623818
LIT_MM_TOMCZAK_MYOGENIC_2D_C1_DIFF	GTSE1	5.89323	1.62901	0.597002	2.72865	0.00635943	0.0194526
LIT_MM_HSIAO_VAMPIRE_THIAZOLIDINEDIONE_DN	RETN	55.5961	1.64604	0.603831	2.72599	0.00641093	0.0195768
LIT_MM_HOFFMANN_PRE-BI_VS_SMALL-PRE-BII-CELL_DIFF	CENPE	8.93317	1.64663	0.693214	2.37536	0.017532	0.0442895
LIT_MM_HUANG_MAMMARY-TUMOR_MMTV-WNT-1_VS_MMTV-NEU-TG-MICE_DN	GP9	8.07435	1.64974	0.591109	2.79093	0.00525567	0.0166244
LIT_MM_DIVINA_GERMINAL-CELL_DN	TRAPPC6A	74.8577	1.65015	0.321645	5.13035	2.89197e-07	7.3611e-06
LIT_MM_ZENG_2-CELL-TRANSIENT_PREIMPLANTATION_DIFF	CETN4	4.42473	1.65334	0.568738	2.90703	0.00364875	0.0123823
LIT_MM_YAO_29M-BDF1-MICE_TESTIS_UP	REC8	10.3845	1.6615	0.578626	2.87146	0.00408577	0.0135686
LIT_MM_HOFFMANN_PRE-BI_VS_SMALL-PRE-BII-CELL_DIFF	AURKB	5.70063	1.66776	0.705754	2.36309	0.0181232	0.0454923
LIT_MM_MIROTSOU_MI-LV_TAC-LV_TAC-SEPTUM_UP	POLN	6.55464	1.67481	0.479515	3.49272	0.000478131	0.0024479
LIT_MM_TOMCZAK_MYOGENIC_2D_C3_DIFF	MUSTN1	3289.29	1.67559	0.183734	9.11966	7.53628e-20	1.52261e-16
LIT_MM_MEYER_LOW-PHOSPHATE-DIET_NORMAL-MICE_DN	PCBD1	9.61776	1.6765	0.540172	3.10363	0.00191159	0.00740404
LIT_MM_DAUPHINOT_TS1CJE-MICE_VS_EUPLOIDS_VARAN_ANOVA_DIFF	ZAP70	15.8851	1.68084	0.367708	4.57112	4.85119e-06	6.71317e-05
LIT_MM_YOSHIDA_DNASE2A_FETAL-LIVER_UP	APOL9B	11.5294	1.68444	0.501891	3.35619	0.000790247	0.00363689
LIT_MM_GREENWOOD_SCGT1_VS_GT1_DN	GDAP1L1	7.06675	1.68509	0.461236	3.65344	0.000258754	0.00150951
LOC_MM_CHR11_B1.1	F630206G17RIK	13.6718	1.68717	0.618791	2.72655	0.00639994	0.0195543
LIT_MM_HOFFMANN_IMMATURE_VS_MATURE-B-CELL_DIFF	MS4A4C	6.81513	1.69399	0.622304	2.72213	0.00648627	0.0197402
LIT_MM_TRIMARCHI_RPC-MARKER_CYCLIN-D1_ASSOCIATED_DIFF	4732490B19RIK	6.62485	1.71217	0.669468	2.5575	0.0105426	0.0293137
LIT_MM_BROCHIER_BRAIN_REGION-ENRICHED-TRANSCRIPT_SAGE_DIFF	SH2D5	4.62473	1.71647	0.580457	2.9571	0.00310549	0.0108763
LIT_MM_ZENG_1-CELL-TRANSIENT_PREIMPLANTATION_DIFF	ACOXL	3.21296	1.72602	0.653725	2.64029	0.0082836	0.0240892
LIT_MM_KOZUL_LUNG_100PPB-ARSENIC-DW_10PPB-ARSENIC-DW_IMMUNE_DIFF	GM12185	39.3157	1.7276	0.464473	3.71949	0.000199628	0.00122777
LIT_MM_RIVOLTA_COCHLEAR_HAIR_DAY9_UP	SERPINB1A	168.755	1.7319	0.379326	4.56573	4.97748e-06	6.82946e-05
MSIGDB_MM_BRUINS_UVC_RESPONSE_EARLY_LATE	SNHG9	6.99217	1.73238	0.490797	3.52974	0.000415971	0.00218716
LIT_MM_COSTOYA_BV2_ZFP145-PLUS_VS_ZFP145-MINUS_UP	KIF15	9.08843	1.73988	0.562645	3.09232	0.00198601	0.00760841
LIT_MM_TSENG_16-W-MDX_GASTROCNEMIUS-MUSCLE_UP	CD52	45.9602	1.74364	0.389297	4.47894	7.50147e-06	9.29724e-05
LIT_MM_CSISZAR_CYTOKINE-CHEMOKINE_CORONARY-ARTERIES_DIFF	IL6	4.04262	1.74695	0.574237	3.04222	0.00234844	0.00865431
LIT_MM_DONZE_PKR_DN	STMN1	21.0027	1.74719	0.425304	4.10809	3.98943e-05	0.00034262
LIT_MM_MAHERALI_2D4IPS-CELL_ES_MEF_DIFF	2810032G03RIK	16.9798	1.75653	0.371789	4.72454	2.30641e-06	3.74707e-05
LIT_MM_MASSARO_CALORIE_VS_AD-LIBITUM_336H_UP	CIDEA	25.4384	1.75951	0.368262	4.77788	1.77157e-06	3.05591e-05
LIT_MM_EAVES_IDD5_VS_NOD_SPLEEN_UP	UBE2C	16.4426	1.7598	0.519473	3.38766	0.000704917	0.00332562
LIT_MM_RIVOLTA_COCHLEAR_HAIR_DAY4_UP	CALML4	26.7821	1.79359	0.41552	4.31649	1.58528e-05	0.000165843
LIT_MM_DIVINA_TOTAL-TESTIS_PEM-1-2PEMTT_MAPPED_DIFF	ANKRD55	5.66183	1.80441	0.667967	2.70134	0.00690604	0.020713
LIT_MM_OATLEY_GDNF-GFR1_ALL_DN	PNP2	3.71435	1.80536	0.745818	2.42065	0.0154928	0.0401361
LIT_MM_TOMCZAK_MYOGENIC_2D_C4_DIFF	CPNE2	654.191	1.80592	0.341004	5.29589	1.18438e-07	3.63939e-06
LIT_MM_MOYNIHAN_SIRT1-OVEREXPRESSING-BETA-CELL_DN	KLHDC8A	19.2732	1.82203	0.462879	3.9363	8.27483e-05	0.000615774
LIT_MM_EAVES_IDD3-5_VS_NOD_SPLEEN_UP	CCNA2	17.3595	1.83077	0.476666	3.84078	0.000122644	0.000845688
LIT_MM_ROWLAND_MUTANT569_MUTANT391_GHR_DN	ORM1	11.2306	1.83798	0.563226	3.26331	0.0011012	0.00476157
LIT_MM_CUI_TA_E16.5BS_DN	CALR4	3.19355	1.84494	0.658361	2.80232	0.0050737	0.0161844
LIT_MM_MIJALSKI_16DUAL-COLOR_HYBRIDIZATIONS_KIDNEY_UP	SLC44A4	2.83445	1.84714	0.772428	2.39134	0.0167869	0.0427554
LIT_MM_CHEN_FEMALE-LIVER-CONNECTIVITY-MAP_DIFF	CHRNA9	10.2324	1.86101	0.475206	3.91621	8.99529e-05	0.000658151
LIT_MM_ZENG_MATERNAL_PREIMPLANTATION_DIFF	GM14446	2.45668	1.86221	0.712544	2.61347	0.00896277	0.0256899
LIT_MM_WELLS_LPS-INDUCIBLE_BALB-C_C3H-ARC_NOT-C3H-HEJ-STRAIN_DIFF	CKAP2L	5.51516	1.86862	0.677583	2.75777	0.00581978	0.0181138
LIT_MM_GOLDRATH_MEMORY_ANTIGEN-DRIVEN_ACTIVATION-OT-I-CD8-T-CELL_DIFF	PRKCZ	98.6781	1.87178	0.279141	6.7055	2.0072e-11	3.31045e-09
LIT_MM_MCCABE_WTPRE_VS_RB-PRE-CELL_SERUM_DN	CCNB2	12.6592	1.87316	0.652575	2.87042	0.00409928	0.0136012
LIT_MM_PAN_2FOLD-LOWER_OOCYTE-ANTRAL-STAGE_C0D_VS_UNPRIMED_UP	A930018P22RIK	3.70171	1.88055	0.693809	2.71047	0.00671879	0.0202907
LIT_MM_HUTTON_IMMUNE_DIFF	GINS2	7.39192	1.88061	0.691776	2.71852	0.00655754	0.0199116
LIT_MM_TOMCZAK_MYOGENIC_2D_C2_DIFF	FOXQ1	5.84677	1.88442	0.497822	3.78533	0.000153503	0.00100326
LIT_MM_YAO_6HP4_KO_VS_SAM_UP	LCN2	39.5333	1.90966	0.821897	2.32348	0.0201534	0.0495722
LIT_MM_HALDAR_SYT-SSX_UP	LRRTM2	4.978	1.90986	0.543718	3.51259	0.00044377	0.00230558
LIT_MM_HOFFMANN_PRE-BI_VS_SMALL-PRE-BII-CELL_DIFF	2810417H13RIK	11.2141	1.91963	0.632986	3.03265	0.00242417	0.00888039
LIT_MM_TOMCZAK_MYOGENIC_2D_C3_DIFF	MSLN	20.1728	1.9269	0.450139	4.28069	1.86315e-05	0.000187899
LIT_MM_LIN_RBP2F_F-MEN1F_F-RIP-CRE_MEN1F_F-RIP-CRE_PANCREATIC-ISLET_DN	VAULTRC5	2.15028	1.9306	0.770014	2.50722	0.0121684	0.0329168
LIT_MM_ZHU_LBP_LP_DIFF	MS4A4B	5.91438	1.95093	0.53522	3.6451	0.000267289	0.0015479
LIT_MM_MOYNIHAN_SIRT1-OVEREXPRESSING-BETA-CELL_UP	2900079G21RIK	12.3893	1.95492	0.5815	3.36185	0.000774212	0.00358247
LIT_MM_ZHU_LBP_LP_DIFF	RGS1	3.67377	1.96854	0.67581	2.91286	0.0035814	0.0122252
LIT_MM_LANG_SOCS3_VS_MACROPHAGES_400TREATMENT_IL-6_UP	MT2	389.901	1.97336	0.615998	3.20352	0.00135759	0.00561338
LIT_MM_DONZE_PKR_DN	OAZ1	14.0926	1.97958	0.522	3.79229	0.000149262	0.000983501
LIT_MM_TOMCZAK_MYOGENIC_2D_C1_DIFF	NDC80	6.49194	1.9919	0.597405	3.33425	0.000855285	0.00387266
LIT_MM_HAMATANI_DORMANT_ACTIVATED-BLASTOCYST_DIFF	AIF1L	262.823	2.02584	0.576188	3.51593	0.000438212	0.00228184
LIT_MM_TOMCZAK_MYOGENIC_2D_C4_DIFF	GABRG2	2.76517	2.03492	0.711034	2.86192	0.00421077	0.0139037
LIT_MM_HOFFMANN_T-CELL_LYMPHOCYTE_C2_DIFF	PLAC8	28.6299	2.041	0.522194	3.9085	9.28693e-05	0.000675217
LIT_MM_LANG_SOCS3_VS_MACROPHAGES_400TREATMENT_IL-6_UP	CCL8	56.7147	2.0433	0.611715	3.34028	0.000836934	0.00380731
LIT_MM_WELLS_MACROPHAGE_RIKEN-CLONE_FANTOM_DIFF	STEAP1	3.24308	2.04866	0.831939	2.46251	0.0137967	0.0365149
LIT_MM_HOFFMANN_PRE-BI_VS_SMALL-PRE-BII-CELL_DIFF	LGALS3	316.916	2.06212	0.478786	4.30699	1.65493e-05	0.000171906
LIT_MM_FERTUCK_APOPTOTIC_OTHER-SIGNALING-RESPONSE_DIFF	GAL	5.15081	2.06505	0.812831	2.54057	0.0110672	0.0304942
LIT_MM_MOYNIHAN_SIRT1-KNOCKDOWN-BETA-CELL_UP	GSDMA	8.02135	2.06575	0.593066	3.48317	0.000495515	0.00251777
LIT_MM_MEHRABIAN_LIVER_BXD-CROSS_ALOX5-LOCUS_DIFF	CLEC1B	8.97839	2.07451	0.56692	3.65926	0.000252945	0.00148505
LIT_MM_MAJKA_PMVEC_BMPR2DELX4_DIFF	GM4841	369.711	2.07813	0.493072	4.21465	2.50161e-05	0.000237008
LIT_MM_EAVES_IDD3-5_VS_NOD_THYMUS_UP	SLC23A3	6.80119	2.08122	0.469878	4.42929	9.45458e-06	0.000111461
LIT_MM_BAUER_ENZYMES_FATTY-ACID_LIPID-METABOLISM_DN	APOL9A	5.87594	2.08436	0.641969	3.24683	0.00116698	0.00497792
LIT_MM_SHAROVA_CORRELATED-NEGATIVELY-PC1_DIFF	CAPN11	10.3195	2.09556	0.81495	2.5714	0.0101289	0.0284077
LIT_MM_HOFFMANN_LARGE_VS_SMALL-PRE-BII-CELL_DIFF	MYOG	154.073	2.09589	0.415489	5.0444	4.54958e-07	1.0357e-05
LIT_MM_ZENG_8-CELL-TRANSIENT_PREIMPLANTATION_DIFF	CITED1	12.1375	2.09941	0.541051	3.88024	0.000104352	0.000742302
LIT_MM_MATSUI_ALLOGRAFT_VS_ISOGRAFT_7D_UP	KLRD1	3.17238	2.1013	0.738225	2.84643	0.0044213	0.0144571
LIT_MM_EDWARDS_CD4_VS_CD8ALPHA_DN	CD8A	3.37417	2.10418	0.847829	2.48184	0.0130706	0.0348728
LIT_MM_RIVOLTA_COCHLEAR_HAIR_DAY2_UP	GADD45A	1190.97	2.11311	0.285216	7.40881	1.27433e-13	4.20348e-11
LIT_MM_SOKOLOVIC_FASTING_INTESTINE_12H_DN	1700011I03RIK	14.2735	2.11628	0.40697	5.20009	1.99196e-07	5.5415e-06
LIT_MM_PORTER_MEOM_MLM-MYOBLAST_DIFF	GDF15	4.1544	2.13216	0.644375	3.30888	0.000936684	0.0041707
LIT_MM_ZHU_LBP_LP_DIFF	ESCO2	2.38681	2.13409	0.874008	2.44173	0.0146169	0.0382659
LIT_MM_CHEN_DELAYED_PACAP?DEPENDENCE_STROKE_DIFF	LHFPL3	3.34392	2.14642	0.643752	3.33423	0.000855374	0.00387266
LIT_MM_SPACH_CNS_1-25-OH-2D3_DN	CD3D	2.43915	2.1498	0.854919	2.51462	0.011916	0.0323369
LIT_MM_TABIBIAZAR_VASCULAR-WALL_VASCULAR_C57_UP	KCND3	7.78742	2.15065	0.496405	4.33245	1.47458e-05	0.000157318
LIT_MM_TSENG_16-W-MDX_GASTROCNEMIUS-MUSCLE_UP	AF251705	14.8391	2.1829	0.583194	3.74301	0.000181832	0.00114659
LIT_MM_RIVOLTA_COCHLEAR_HAIR_DAY4_UP	CDKN1A	702.31	2.20663	0.339056	6.50818	7.60683e-11	1.05085e-08
LIT_MM_REINHOLDT_TS65DN_DIPLOID_SPERMATOCYTE_19-20DPP_DN	1700101I11RIK	6.13671	2.209	0.468063	4.71946	2.36477e-06	3.82282e-05
LIT_MM_ZENG_MATERNAL_PREIMPLANTATION_DIFF	BC021891	10.9461	2.21634	0.40119	5.52443	3.30563e-08	1.32172e-06
LIT_MM_SYMULA_CDK4_VS_ES-CELL-LINE_DIFF	UCHL1	201.025	2.22249	0.381666	5.82312	5.77586e-09	3.30758e-07
LIT_MM_EDWARDS_CD4_VS_CD8ALPHA_UP	MMP12	14.603	2.22352	0.609601	3.6475	0.000264804	0.00153638
LIT_MM_SHETH_PAM5_TUMOR_LIVER_TXNIP-DEFICIENT_DIFF	OPRD1	3.90493	2.22405	0.648801	3.42793	0.000608191	0.0029539
LIT_MM_MACKIEWICZ_C2_CEREBRAL-CORTEX_SLEEP_UP	TMEM151A	3.25899	2.23951	0.924763	2.42172	0.0154475	0.0400316
LIT_MM_MATSUI_ALLOGRAFT_VS_ISOGRAFT_7D_UP	SERPINA3G	3.08553	2.26126	0.796764	2.83806	0.00453892	0.014767
LIT_MM_YAO_BDF1-MOUSE_TESTIS_FUNCTION_DIFF	ROPN1L	3.24155	2.27317	0.804642	2.82506	0.00472711	0.015287
LIT_MM_HAMRA_I-NC-LIST_POSTNATAL-TESTIS_DIFF	SNAP91	3.11635	2.27413	0.838247	2.71295	0.00666863	0.0201856
LIT_MM_LIADAKI_SIDE-POPULATION_MUSCLE_VS_BONE-MARROW_DN	CD3G	2.78347	2.28469	0.782481	2.91981	0.00350247	0.0120192
LIT_MM_BAUER_ENZYMES_CHOLESTEROL_DHEA-METABOLISM_DIFF	HSD3B3	4.41275	2.29115	0.673168	3.40354	0.000665183	0.00316775
LIT_MM_TANG_DICER-KO-MATURE-OOCYTE_ABARRAY_UP	TREML1	3.65674	2.31415	0.717646	3.22464	0.00126131	0.00528425
LIT_MM_MOLOFSKY_BMI-1_NEUROSPHERES-CULTURED_UP	CDKN2A	8.98767	2.32248	0.648008	3.58404	0.000338324	0.00186124
LIT_MM_SHAROVA_CORRELATED-NEGATIVELY-PC1_DIFF	2410137F16RIK	94.7631	2.3363	0.324658	7.1962	6.19139e-13	1.75564e-10
LIT_MM_MA_E2F1_DN	SLPI	5.81592	2.35054	0.755628	3.11071	0.00186637	0.00726019
LIT_MM_HOFFMANN_PRE-BI_VS_SMALL-PRE-BII-CELL_DIFF	CKS2	4.36692	2.36107	0.921268	2.56285	0.0103817	0.0289609
LIT_MM_SHAROV_AD-LIBITUM-DIET_FEMALE_OVARY_YOUNG-1-6M_OLD-16-24M_DIFF	8430423G03RIK	2.68113	2.36737	0.909748	2.60222	0.0092622	0.0263751
LIT_MM_FUNATSU_MEDIAL-REGION_UP	EOMES	1.48309	2.37204	0.999193	2.37396	0.0175986	0.0444088
LIT_MM_ZHU_LPS_IFN-2_MA_PGE2_ISO_DIFF	PBK	6.62617	2.40281	0.755574	3.18012	0.00147215	0.00599808
LIT_MM_ZHU_LBP_LP_DIFF	MXD3	3.8389	2.4109	0.944832	2.55167	0.0107209	0.0297276
LIT_MM_TOMCZAK_MYOGENIC_2D_C1_DIFF	CKAP2	10.672	2.43058	0.646015	3.76242	0.000168278	0.00107889
LIT_MM_HAMATANI_YOUNG_VS_AGED-OOCYTE_UP	CEP55	4.35435	2.43761	0.806068	3.02407	0.00249396	0.0090911
LIT_MM_CSISZAR_CYTOKINE-CHEMOKINE_CORONARY-ARTERIES_DIFF	CXCL2	2.07711	2.43961	1.01681	2.39928	0.0164275	0.042099
LIT_MM_TOMCZAK_MYOGENIC_2D_C1_DIFF	FAM64A	5.03109	2.44449	0.928277	2.63336	0.00845447	0.0244848
LIT_MM_RIVOLTA_COCHLEAR_HAIR_DAY9_DN	TIMP1	54.9628	2.45301	0.654399	3.7485	0.000177899	0.00112848
LIT_MM_DONZE_PKR_UP	BC051142	7.60737	2.46217	0.512607	4.80323	1.56128e-06	2.77004e-05
LIT_MM_LEE_C4_GD-MODEL_DOPAMINERGIC-NEURON_ESC_DIFF	KCNIP1	1.14902	2.46523	1.0043	2.45468	0.014101	0.0371578
LIT_MM_HOFFMANN_PRE-BI_VS_LARGE-PRE-BII-CELL_DIFF	CCL5	11.4909	2.46603	0.610172	4.04154	5.31016e-05	0.000432602
LIT_MM_SUSZTAK_STZ-TREATED_C57BL6-MICE_DIFF	AKR1C19	2.52235	2.47001	0.865346	2.85436	0.00431239	0.0141698
LIT_MM_COTTET_RPE65_RETINA_DN	GM4792	4.07995	2.47058	0.807168	3.06079	0.0022075	0.00823635
LIT_MM_HOFFMANN_PRE-BI_VS_SMALL-PRE-BII-CELL_DIFF	KIF2C	4.83681	2.47608	0.822344	3.011	0.00260388	0.00942375
LIT_MM_EAVES_IDD3-5_VS_NOD_SPLEEN_UP	CDK1	12.4963	2.50384	0.751648	3.33113	0.000864938	0.00390176
LIT_MM_SPACH_CNS_EAE_DN	CTSW	5.07495	2.50463	0.738351	3.39219	0.000693374	0.00327882
LIT_MM_ZHU_LBP_LP_DIFF	SOAT2	3.70698	2.51707	0.783571	3.21231	0.00131673	0.00547524
LIT_MM_ZHU_LBP_LP_DIFF	LY6I	1.62225	2.52531	1.08748	2.32217	0.0202235	0.0497109
LIT_MM_CHENG_AFC-NRL_VS_AFC-NR2E3-TRANSGENIC_VS_NRL-4W_DIFF	SLC24A1	2.14466	2.55888	0.911401	2.80763	0.00499071	0.0159638
LIT_MM_TOMCZAK_MYOGENIC_2D_C3_DIFF	HSF2BP	12.5979	2.56515	0.50776	5.05189	4.37453e-07	1.0072e-05
LIT_MM_SCHADT_LIVER_BXD-CROSS_DIFF	2310034O05RIK	1.21853	2.57696	1.10526	2.33155	0.0197245	0.0487176
LIT_MM_LANG_SOCS3_VS_MACROPHAGES_100TREATMENT_IL-6_UP	CXCL10	38.0315	2.6054	0.345833	7.53369	4.93248e-14	1.89818e-11
LIT_MM_BEGLOPOULOS_CEREBRAL-CORTEX_PRESENILIN_DN	ARHGDIG	33.195	2.62652	0.417829	6.28611	3.25517e-10	3.30453e-08
LIT_MM_MASSARO_CALORIE_VS_AD-LIBITUM_336H_DN	BIRC5	9.98499	2.62795	0.725122	3.62415	0.000289912	0.00164531
LIT_MM_CVETKOVIC-LOPES_IP-MRNA_TOTAL-BRAIN-MRNA_UP	AU022793	2.14155	2.62952	1.1054	2.37879	0.0173695	0.0439486
LIT_MM_LU_ESTROGEN-PROGESTERONE_VS_VEHICLE-TREATMENT_DIFF	CACNG4	5.51809	2.62953	0.57977	4.53548	5.74737e-06	7.60809e-05
LIT_MM_TSENG_16-W-MDX_GASTROCNEMIUS-MUSCLE_UP	BCL2A1B	7.16806	2.66268	0.78979	3.37138	0.000747919	0.00348375
LIT_MM_TURK_INBRED-STRAIN_DIFF	CNTN2	4.75568	2.67947	1.06626	2.51296	0.0119724	0.0324649
LIT_MM_BARASH_48H_EC-BOUT_UP	ANKRD1	1974.76	2.68099	0.284572	9.42112	4.46289e-21	1.03048e-17
LIT_MM_KUCZMA_SCURFY_DIFF	PYDC4	1.76567	2.69757	0.944915	2.85483	0.00430602	0.014169
LIT_MM_SILVA-VARGAS_4-HYDROXYTAMOXIFEN_K14-BETAN-CATENINER_UP	PADI1	5.39785	2.72336	0.637202	4.27393	1.92054e-05	0.000192442
LIT_MM_SHETTY_OLFACTORY-SENSORY-NEURON_DIFF	SCG5	3.03127	2.73735	0.797994	3.43028	0.00060295	0.00293627
LIT_MM_ZENG_MATERNAL_PREIMPLANTATION_DIFF	OTOS	3.64531	2.74181	0.81147	3.37882	0.000727977	0.00340657
LIT_MM_KRUTZFELDT_LIVERS_ANTAGOMIR-122-TREATED_VS_MM-ANTAGOMIR-122_UP	VWC2	1.33286	2.74563	1.17928	2.32822	0.0199004	0.0490994
LIT_MM_HOFFMANN_PRE-BI_VS_SMALL-PRE-BII-CELL_DIFF	CDC25C	1.36059	2.78247	1.19823	2.32214	0.0202251	0.0497109
LIT_MM_ESAU_LIVER_4W_ALINE_VS_MIR-122-ASO-2W_DN	SLC17A8	3.16302	2.83634	0.800971	3.54113	0.000398422	0.00211554
LIT_MM_SUSZTAK_MESANGIAL-MATRIX_VS_MINIMALMESANGIAL_DIFF	MAPK13	3.20141	2.88737	0.878383	3.28714	0.0010121	0.00444284
LIT_MM_BUCHSTALLER_C5_E16_E18_P0_UP	EPHA5	1.50691	2.92146	1.02171	2.85937	0.00424479	0.0140017
LIT_MM_REDDY_GLUCOCORTICOID_CIRCADIAN_LIVER_DIFF	MT3	73.4215	2.93223	0.370247	7.91966	2.38152e-15	1.28309e-12
LIT_MM_DIVINA_GERMINAL-CELL_DN	4933415F23RIK	67.1064	2.94719	0.477015	6.17839	6.47585e-10	5.85019e-08
LIT_MM_SCHWARTZ_KIDNEY_ANGIOTENSIN-II_CONTROL-SAGE_UP	FBP1	1.56313	2.97399	0.948933	3.13404	0.00172418	0.00679707
LIT_MM_TOMCZAK_MYOGENIC_2D_C3_DIFF	RRAD	401.9	2.991	0.590967	5.06119	4.16639e-07	9.71737e-06
LIT_MM_SMALL_TESTIS_VS_OVARY_MURINE-EMBRYONIC-GONAD_UP	CCDC79	0.836656	3.00738	1.19583	2.5149	0.0119066	0.0323222
LIT_MM_SCHAEFER_DRD1-CRE_DRD1-BACTRAP_G9AFL_FL_STRIATUM_UP	GM2694	3.56541	3.01735	0.757972	3.98082	6.86774e-05	0.000532135
LIT_MM_PEETERS_VOLTAGE_DRG_VS_NG-VISCERAL-NEURONS_DIFF	SCN5A	78.2934	3.02128	0.679232	4.44808	8.66401e-06	0.000104505
LIT_MM_FREY_KIDNEY_PEPT2-DEFICIENT_20K-CDNA_DN	CES2C	21.72	3.04843	0.792124	3.84842	0.000118881	0.000825023
LIT_MM_HOFFMANN_PRE-BI_VS_SMALL-PRE-BII-CELL_DIFF	CCNB1	3.65694	3.07566	1.04789	2.93511	0.00333433	0.0115353
LIT_MM_HOFFMANN_PRE-BI_VS_SMALL-PRE-BII-CELL_DIFF	CDCA5	2.78234	3.07917	1.17452	2.62164	0.00875073	0.0251624
LIT_MM_SYMULA_ABCAA1_VS_ES-CELL-LINE_DIFF	KRT8	29.2127	3.12803	1.0681	2.92859	0.00340501	0.0117421
LIT_MM_TOMCZAK_MYOGENIC_2D_C3_DIFF	GDF5	44.4985	3.26258	0.437424	7.45863	8.74287e-14	3.00662e-11
LIT_MM_ESAU_LIVER_4W_ALINE_VS_MIR-122-ASO-2W_UP	GM7609	1.90948	3.26632	0.943147	3.46321	0.000533766	0.00267098
MSIGDB_MM_AFFAR_YY1_TARGETS_UP	GBP1	1.43456	3.28016	1.26429	2.59447	0.00947362	0.0268554
LIT_MM_RIVOLTA_COCHLEAR_HAIR_DAY2_UP	IGFBP2	10.0457	3.30482	1.14354	2.89	0.00385247	0.0129697
LIT_MM_ZHU_LPS_IFN-2_MA_PGE2_ISO_DIFF	F10	6.25168	3.38451	0.871555	3.88331	0.000103046	0.00073501
LIT_MM_SHETH_PAM4_TUMOR_LIVER_TXNIP-DEFICIENT_DIFF	OLIG1	2.75012	3.4069	1.07101	3.181	0.00146766	0.0059858
LIT_MM_SHELL_LPS-STIMULATED-RAW-MACROPHAGE_UP	C130026I21RIK	2.19613	3.51159	1.15805	3.03233	0.00242674	0.00888508
LIT_MM_KWONG_MIP-1ALPHA_3D_POSTOLFACTORY_BULBECTOMY_UP	ORM2	3.98948	3.53267	1.17147	3.01559	0.00256477	0.0093114
LIT_MM_ZENG_1-CELL-TRANSIENT_PREIMPLANTATION_DIFF	ERC2	45.9732	3.54275	0.352494	10.0505	9.13815e-24	4.92333e-20
LIT_MM_BLAXALL_NORMAL_HF_DIFF	NPPB	1.66048	3.55059	1.035	3.43053	0.000602401	0.00293448
LIT_MM_ZENG_1-CELL-TRANSIENT_PREIMPLANTATION_DIFF	NEIL3	2.26253	3.56387	1.06972	3.33159	0.000863514	0.00389676
LIT_MM_ARIEL_SOCS3-NULL_ES-CELL_UP	AA467197	9.17668	3.58577	0.66278	5.41019	6.29574e-08	2.21213e-06
LIT_MM_TOMCZAK_MYOGENIC_2D_C3_DIFF	CHRNG	41.2694	3.5989	0.837503	4.29718	1.72983e-05	0.000177983
LIT_MM_NAMEKAWA_X-LINKED_DURING-SPERMATOGENESIS_DIFF	1110059M19RIK	9.3095	3.61254	0.72952	4.95194	7.34767e-07	1.51674e-05
LIT_MM_CSISZAR_CYTOKINE-CHEMOKINE_CORONARY-ARTERIES_DIFF	CCL17	2.4258	3.65056	1.18772	3.07357	0.00211513	0.00798386
LIT_MM_SHAROVA_CORRELATED-PC1-0.69PC2_STRAIN_DIFF	4930558C23RIK	1.30435	3.66331	1.18148	3.10061	0.00193122	0.00745329
LIT_MM_BATTLE_HNF4ALPHA-NULL-EMBRYONIC_LIVER_DN	1300002K09RIK	1.31709	3.67474	1.34907	2.72391	0.00645133	0.0196704
LIT_MM_DIVINA_TOTAL-TESTIS_PEM-1-2PEMTT_MAPPED_DIFF	ATP13A4	2.53517	3.70577	1.10572	3.35145	0.000803881	0.00368495
LIT_MM_POIROT_PANC45-B6G7_VS_NOD_UP	DNTT	1.92092	3.73983	0.974082	3.83934	0.000123364	0.000849059
LIT_MM_SILVA-VARGAS_4-HYDROXYTAMOXIFEN_K14-BETAN-CATENINER_UP	SYT4	2.04122	3.84713	1.10979	3.46655	0.000527175	0.00264619
LIT_MM_NORMAN_ADULT-CORNEA-TAG-COUNT_NOT-NORMALIZED_DN	SPRR1A	2.08038	3.89064	1.1505	3.38171	0.000720354	0.00337971
LIT_MM_RAJASHEKHAR_CONTINUOUS_VS_ACUTE-ACTIVATION_DIFF	TAC4	3.68392	4.28063	1.2242	3.49668	0.000471091	0.00242029
LIT_MM_PORTER_MEOM_MLM-MYOBLAST_DIFF	SLN	599.191	4.32713	0.777333	5.56664	2.59703e-08	1.08185e-06
LIT_MM_MATSUI_ALLOGRAFT_VS_ISOGRAFT_7D_UP	UBD	4.20084	4.46345	1.02157	4.36921	1.24694e-05	0.000137572
LIT_MM_SYMULA_ABCAA1_VS_ES-CELL-LINE_DIFF	KRT18	254.814	4.48683	0.903449	4.96634	6.82289e-07	1.43219e-05
LIT_MM_LECLERC_APCMIN_VS_TUMOR_DIFF	BPIFB1	11.4775	4.53438	1.28815	3.52007	0.000431425	0.00225594

## Sheet: eTableS5 GOrilla 6m vs. 28m
FDR q-val<0.10
GO Term		P-value	FDR q-value	Enrichment	Genes	gene_id
GO:0016907	G protein-coupled acetylcholine receptor activity	0.000512	0.0362	26.29	[Chrm4 - cholinergic receptor, muscarinic 4, Hrh4 - histamine receptor h4, Chrm2 - cholinergic receptor, muscarinic 2, cardiac]	['Chrm4', 'Hrh4', 'Chrm2']
GO:0098639	collagen binding involved in cell-matrix adhesion	0.000354	0.0267	25.65	[Itga2 - integrin alpha 2, Itga1 - integrin alpha 1, Itga11 - integrin alpha 11]	['Itga2', 'Itga1', 'Itga11']
GO:0048407	platelet-derived growth factor binding	7.09e-07	0.00013	21.87	[Col1a2 - collagen, type i, alpha 2, Col1a1 - collagen, type i, alpha 1, Col3a1 - collagen, type iii, alpha 1, Col4a1 - collagen, type iv, alpha 1, Col5a1 - collagen, type v, alpha 1, Col6a1 - collagen, type vi, alpha 1]	['Col1a2', 'Col1a1', 'Col3a1', 'Col4a1', 'Col5a1', 'Col6a1']
GO:0008046	axon guidance receptor activity	0.000479	0.035	14.32	[Ephb2 - eph receptor b2, Robo1 - roundabout homolog 1 (drosophila), Sema5a - sema domain, seven thrombospondin repeats (type 1 and type 1-like), transmembrane domain (tm) and short cytoplasmic domain, (semaphorin) 5a, Palld - palladin, cytoskeletal associated protein]	['Ephb2', 'Robo1', 'Sema5a', 'Palld']
GO:0035373	chondroitin sulfate proteoglycan binding	0.000949	0.0598	14.24	[Ptprf - protein tyrosine phosphatase, receptor type, f, Sema5a - sema domain, seven thrombospondin repeats (type 1 and type 1-like), transmembrane domain (tm) and short cytoplasmic domain, (semaphorin) 5a, Ptn - pleiotrophin]	['Ptprf', 'Sema5a', 'Ptn']
GO:0015464	acetylcholine receptor activity	0.000947	0.0605	13.63	[Chrm4 - cholinergic receptor, muscarinic 4, Hrh4 - histamine receptor h4, Chrm2 - cholinergic receptor, muscarinic 2, cardiac, Chrna2 - cholinergic receptor, nicotinic, alpha polypeptide 2 (neuronal)]	['Chrm4', 'Hrh4', 'Chrm2', 'Chrna2']
GO:0005021	vascular endothelial growth factor receptor activity	4.47e-05	0.00447	12.9	[Flt1 - fms-like tyrosine kinase 1, Kdr - kinase insert domain protein receptor, Flt4 - fms-like tyrosine kinase 4, Pdgfra - platelet derived growth factor receptor, alpha polypeptide, Dear1 - dual endothelin 1/angiotensin ii receptor 1]	['Flt1', 'Kdr', 'Flt4', 'Pdgfra', 'Dear1']
GO:0030020	extracellular matrix structural constituent conferring tensile strength	8.93e-14	1.37e-10	12.04	[Col14a1 - collagen, type xiv, alpha 1, Col15a1 - collagen, type xv, alpha 1, Col3a1 - collagen, type iii, alpha 1, Col4a2 - collagen, type iv, alpha 2, Col4a1 - collagen, type iv, alpha 1, Col6a6 - collagen, type vi, alpha 6, Col4a4 - collagen, type iv, alpha 4, Col4a3 - collagen, type iv, alpha 3, Col5a1 - collagen, type v, alpha 1, Col1a2 - collagen, type i, alpha 2, Col1a1 - collagen, type i,…	['Col14a1', 'Col15a1', 'Col3a1', 'Col4a2', 'Col4a1', 'Col6a6', 'Col4a4', 'Col4a3', 'Col5a1', 'Col1a2', 'Col1a1', 'Col5a3', 'Col6a3', 'Col6a2', 'Col6a4', 'Col6a1', 'Col5a2']
GO:0038064	collagen receptor activity	0.000705	0.047	6.97	[Gp6 - glycoprotein 6 (platelet), Itga2 - integrin alpha 2, Ddr2 - discoidin domain receptor family, member 2, Musk - muscle, skeletal, receptor tyrosine kinase, Itga11 - integrin alpha 11]	['Gp6', 'Itga2', 'Ddr2', 'Musk', 'Itga11']
GO:0005201	extracellular matrix structural constituent	6.25e-18	2.88e-14	3.88	[Papln - papilin, proteoglycan-like sulfated glycoprotein, Fn1 - fibronectin 1, Lamc1 - laminin, gamma 1, Ntn1 - netrin 1, Scara3 - scavenger receptor class a, member 3, Npnt - nephronectin, Pxdn - peroxidasin homolog (drosophila), Postn - periostin, osteoblast specific factor, Col5a3 - collagen, type v, alpha 3, Fbln1 - fibulin 1, Col8a2 - collagen, type viii, alpha 2, Fbn2 - fibrillin 2, Fbn1 -…	['Papln', 'Fn1', 'Lamc1', 'Ntn1', 'Scara3', 'Npnt', 'Pxdn', 'Postn', 'Col5a3', 'Fbln1', 'Col8a2', 'Fbn2', 'Fbn1', 'Fbln2', 'Tinag', 'Tecta', 'Mmrn1', 'Hspg2', 'Prelp', 'Reln', 'Col1a2', 'Col1a1', 'Col6a3', 'Col6a2', 'Col6a1', 'Col5a2', 'Col12a1', 'Col14a1', 'Vcan', 'Col15a1', 'Col18a1', 'Col3a1', 'Col2a1', 'Lamb1', 'Col4a2', 'Col4a1', 'Col4a4', 'Col6a6', 'Col4a3', 'Col5a1', 'Col4a5', 'Lama2', 'La…
GO:0004714	transmembrane receptor protein tyrosine kinase activity	1.12e-07	2.72e-05	3.74	[Ephb2 - eph receptor b2, Kdr - kinase insert domain protein receptor, Erbb3 - v-erb-b2 erythroblastic leukemia viral oncogene homolog 3 (avian), Erbb4 - v-erb-a erythroblastic leukemia viral oncogene homolog 4 (avian), Mertk - c-mer proto-oncogene tyrosine kinase, Ddr2 - discoidin domain receptor family, member 2, Pdgfra - platelet derived growth factor receptor, alpha polypeptide, Ntrk2 - neuro…	['Ephb2', 'Kdr', 'Erbb3', 'Erbb4', 'Mertk', 'Ddr2', 'Pdgfra', 'Ntrk2', 'Mst1r', 'Tie1', 'Tek', 'Dear1', 'Ret', 'Fgfr4', 'Insrr', 'Flt1', 'Flt4', 'Epha10', 'Egfr', 'Epha3', 'Ror1', 'Musk', 'Ror2']
GO:0019199	transmembrane receptor protein kinase activity	9.98e-08	2.55e-05	3.36	[Kdr - kinase insert domain protein receptor, Ddr2 - discoidin domain receptor family, member 2, Ntrk2 - neurotrophic tyrosine kinase, receptor, type 2, Mst1r - macrophage stimulating 1 receptor (c-met-related tyrosine kinase), Ret - ret proto-oncogene, Fgfr4 - fibroblast growth factor receptor 4, Bmpr2 - bone morphogenetic protein receptor, type ii (serine/threonine kinase), Insrr - insulin rece…	['Kdr', 'Ddr2', 'Ntrk2', 'Mst1r', 'Ret', 'Fgfr4', 'Bmpr2', 'Insrr', 'Ly6g6e', 'Epha10', 'Musk', 'Ephb2', 'Erbb3', 'Erbb4', 'Mertk', 'Pdgfra', 'Tie1', 'Tek', 'Dear1', 'Flt1', 'Acvr2a', 'Flt4', 'Egfr', 'Acvr2b', 'Epha3', 'Ror1', 'Ror2']
GO:0022843	voltage-gated cation channel activity	1.35e-08	5.63e-06	3.33	[Kcns1 - k+ voltage-gated channel, subfamily s, 1, Tmc2 - transmembrane channel-like gene family 2, Kcnq4 - potassium voltage-gated channel, subfamily q, member 4, Kcng1 - potassium voltage-gated channel, subfamily g, member 1, Hcn3 - hyperpolarization-activated, cyclic nucleotide-gated k+ 3, Kcnj14 - potassium inwardly-rectifying channel, subfamily j, member 14, Kcnh8 - potassium voltage-gated c…	['Kcns1', 'Tmc2', 'Kcnq4', 'Kcng1', 'Hcn3', 'Kcnj14', 'Kcnh8', 'Kcnh6', 'Kcnv2', 'Kcnq3', 'Kcna3', 'Cacng7', 'Kcnb1', 'Kcnc1', 'Lrrc55', 'Kcnt2', 'Kcng4', 'Cacna1e', 'Kcnj12', 'Cacna1g', 'Hcn4', 'Cacna1b', 'Cacna1c', 'Cacna1h', 'Tpcn1', 'Grin1', 'Kcnj9', 'Cacna2d4', 'Grin2d', 'Cachd1', 'Erc1']
GO:0005249	voltage-gated potassium channel activity	6.57e-05	0.00617	3.32	[Kcns1 - k+ voltage-gated channel, subfamily s, 1, Kcnb1 - potassium voltage gated channel, shab-related subfamily, member 1, Kcng1 - potassium voltage-gated channel, subfamily g, member 1, Kcnq4 - potassium voltage-gated channel, subfamily q, member 4, Kcnc1 - potassium voltage gated channel, shaw-related subfamily, member 1, Lrrc55 - leucine rich repeat containing 55, Hcn3 - hyperpolarization-a…	['Kcns1', 'Kcnb1', 'Kcng1', 'Kcnq4', 'Kcnc1', 'Lrrc55', 'Hcn3', 'Kcnt2', 'Kcng4', 'Kcnj14', 'Kcnj12', 'Hcn4', 'Kcnh8', 'Kcnh6', 'Kcnv2', 'Kcnj9', 'Kcnq3', 'Kcna3']
GO:0005245	voltage-gated calcium channel activity	0.000515	0.0359	3.21	[Cacng7 - calcium channel, voltage-dependent, gamma subunit 7, Tmc2 - transmembrane channel-like gene family 2, Cacng8 - calcium channel, voltage-dependent, gamma subunit 8, Ryr1 - ryanodine receptor 1, skeletal muscle, Cacng5 - calcium channel, voltage-dependent, gamma subunit 5, Cacna1e - calcium channel, voltage-dependent, r type, alpha 1e subunit, Cacna1g - calcium channel, voltage-dependent,…	['Cacng7', 'Tmc2', 'Cacng8', 'Ryr1', 'Cacng5', 'Cacna1e', 'Cacna1g', 'Cacna1b', 'Cacna1c', 'Cacna1h', 'Tpcn1', 'Cacna2d4', 'Cachd1', 'Erc1']
GO:0008013	beta-catenin binding	8.33e-07	0.000142	3.2	[Nf2 - neurofibromatosis 2, Ar - androgen receptor, Foxo3 - forkhead box o3, Nos2 - nitric oxide synthase 2, inducible, Sufu - suppressor of fused homolog (drosophila), Rora - rar-related orphan receptor alpha, Dact2 - dapper homolog 2, antagonist of beta-catenin (xenopus), Bcl9 - b cell cll/lymphoma 9, Ptprt - protein tyrosine phosphatase, receptor type, t, Ajap1 - adherens junction associated p…	['Nf2', 'Ar', 'Foxo3', 'Nos2', 'Sufu', 'Rora', 'Dact2', 'Bcl9', 'Ptprt', 'Ajap1', 'Med12', 'Sall1', 'Gli3', 'Ep300', 'Dlg5', 'Apc', 'Dvl3', 'Smad3', 'Apc2', 'Numb', 'Sox30', 'Esr1', 'Kdm6b', 'Bcl9l', 'Cdh5', 'Tbl1x']
GO:0004222	metalloendopeptidase activity	1.49e-06	0.000237	2.92	[Adamts3 - a disintegrin-like and metallopeptidase (reprolysin type) with thrombospondin type 1 motif, 3, Papln - papilin, proteoglycan-like sulfated glycoprotein, Adamts15 - a disintegrin-like and metallopeptidase (reprolysin type) with thrombospondin type 1 motif, 15, Adamts12 - a disintegrin-like and metallopeptidase (reprolysin type) with thrombospondin type 1 motif, 12, Adam19 - a disintegri…	['Adamts3', 'Papln', 'Adamts15', 'Adamts12', 'Adam19', 'Adam2', 'Mmp25', 'Adamts6', 'Adamtsl3', 'Mmp2', 'Mmp16', 'Mmp15', 'Adamtsl2', 'Lmln', 'Mme', 'Thsd4', 'Bmp1', 'Adamts16', 'Ide', 'Adamts19', 'Pappa', 'Adamts2', 'Adamts9', 'Mmp9', 'Mmp28', 'Adamts4', 'Adamts18', 'Adamtsl1', 'Tll2']
GO:0005089		3.16e-05	0.00363	2.91	[Sos1 - son of sevenless homolog 1 (drosophila), Sos2 - son of sevenless homolog 2 (drosophila), Obscn - obscurin, cytoskeletal calmodulin and titin-interacting rhogef, Arhgef37 - rho guanine nucleotide exchange factor (gef) 37, Fgd3 - fyve, rhogef and ph domain containing 3, Arhgef10 - rho guanine nucleotide exchange factor (gef) 10, Plekhg1 - pleckstrin homology domain containing, family g (wit…	['Sos1', 'Sos2', 'Obscn', 'Arhgef37', 'Fgd3', 'Arhgef10', 'Plekhg1', 'Farp1', 'Tiam1', 'Dnmbp', 'Fgd4', 'Trio', 'Dock4', 'Arhgef15', 'Fgd5', 'Vav2', 'Arhgef9', 'Fgd1', 'Spata13', 'Arhgef12', 'Als2', 'Dock9']
GO:0022832	voltage-gated channel activity	8.65e-09	4.42e-06	2.89	[Kcns1 - k+ voltage-gated channel, subfamily s, 1, Tmc2 - transmembrane channel-like gene family 2, Kcng1 - potassium voltage-gated channel, subfamily g, member 1, Kcnq4 - potassium voltage-gated channel, subfamily q, member 4, Hcn3 - hyperpolarization-activated, cyclic nucleotide-gated k+ 3, Clcn5 - chloride channel 5, Kcnj14 - potassium inwardly-rectifying channel, subfamily j, member 14, Kcnh8…	['Kcns1', 'Tmc2', 'Kcng1', 'Kcnq4', 'Hcn3', 'Clcn5', 'Kcnj14', 'Kcnh8', 'Kcnh6', 'Clcn6', 'Kcnv2', 'Scn4a', 'Clic5', 'Kcnq3', 'Clcn1', 'Kcna3', 'Cacng7', 'Kcnb1', 'Kcnc1', 'Lrrc55', 'Trpm5', 'Kcnt2', 'Kcng4', 'Cacna1e', 'Kcnj12', 'Cacna1g', 'Hcn4', 'Cacna1b', 'Cacna1c', 'Cacna1h', 'Tpcn1', 'Grin1', 'Kcnj9', 'Kcnma1', 'Cacna2d4', 'Kcnk7', 'Grin2d', 'Cachd1', 'Erc1']
GO:0005244	voltage-gated ion channel activity	8.65e-09	3.98e-06	2.89	[Kcns1 - k+ voltage-gated channel, subfamily s, 1, Tmc2 - transmembrane channel-like gene family 2, Kcng1 - potassium voltage-gated channel, subfamily g, member 1, Kcnq4 - potassium voltage-gated channel, subfamily q, member 4, Hcn3 - hyperpolarization-activated, cyclic nucleotide-gated k+ 3, Clcn5 - chloride channel 5, Kcnj14 - potassium inwardly-rectifying channel, subfamily j, member 14, Kcnh8…	['Kcns1', 'Tmc2', 'Kcng1', 'Kcnq4', 'Hcn3', 'Clcn5', 'Kcnj14', 'Kcnh8', 'Kcnh6', 'Clcn6', 'Kcnv2', 'Scn4a', 'Clic5', 'Kcnq3', 'Clcn1', 'Kcna3', 'Cacng7', 'Kcnb1', 'Kcnc1', 'Lrrc55', 'Trpm5', 'Kcnt2', 'Kcng4', 'Cacna1e', 'Kcnj12', 'Cacna1g', 'Hcn4', 'Cacna1b', 'Cacna1c', 'Cacna1h', 'Tpcn1', 'Grin1', 'Kcnj9', 'Kcnma1', 'Cacna2d4', 'Kcnk7', 'Grin2d', 'Cachd1', 'Erc1']
GO:0005518	collagen binding	3.95e-05	0.00423	2.86	[Gp6 - glycoprotein 6 (platelet), Itga2 - integrin alpha 2, Mrc2 - mannose receptor, c type 2, Ecm2 - extracellular matrix protein 2, female organ and adipocyte specific, Ddr2 - discoidin domain receptor family, member 2, Lrrc15 - leucine rich repeat containing 15, Smad3 - smad family member 3, Itga1 - integrin alpha 1, Tnxb - tenascin xb, Nid1 - nidogen 1, Antxr1 - anthrax toxin receptor 1, Dpp4…	['Gp6', 'Itga2', 'Mrc2', 'Ecm2', 'Ddr2', 'Lrrc15', 'Smad3', 'Itga1', 'Tnxb', 'Nid1', 'Antxr1', 'Dpp4', 'Rell2', 'Cspg4', 'Lox', 'Coch', 'Musk', 'Col6a4', 'C1qtnf1', 'Col6a2', 'Col6a1', 'Itga11']
GO:0005267	potassium channel activity	4.78e-05	0.00468	2.8	[Kcns1 - k+ voltage-gated channel, subfamily s, 1, Kcnb1 - potassium voltage gated channel, shab-related subfamily, member 1, Kcnc1 - potassium voltage gated channel, shaw-related subfamily, member 1, Kcng1 - potassium voltage-gated channel, subfamily g, member 1, Kcnq4 - potassium voltage-gated channel, subfamily q, member 4, Trpm5 - transient receptor potential cation channel, subfamily m, memb…	['Kcns1', 'Kcnb1', 'Kcnc1', 'Kcng1', 'Kcnq4', 'Trpm5', 'Lrrc55', 'Hcn3', 'Kcnt2', 'Kcng4', 'Kcnj14', 'Kcnj12', 'Abcc9', 'Hcn4', 'Kcnh8', 'Gria2', 'Kcnh6', 'Kcnv2', 'Kcnj9', 'Grik3', 'Kcnma1', 'Kcnk7', 'Kcnq3', 'Kcna3']
GO:0019838	growth factor binding	7.54e-08	2.04e-05	2.77	[Kdr - kinase insert domain protein receptor, Itgb4 - integrin beta 4, Col3a1 - collagen, type iii, alpha 1, Il1r1 - interleukin 1 receptor, type i, Col2a1 - collagen, type ii, alpha 1, Ntrk2 - neurotrophic tyrosine kinase, receptor, type 2, Col4a1 - collagen, type iv, alpha 1, Fgfr4 - fibroblast growth factor receptor 4, Col5a1 - collagen, type v, alpha 1, Bmpr2 - bone morphogenetic protein rece…	['Kdr', 'Itgb4', 'Col3a1', 'Il1r1', 'Col2a1', 'Ntrk2', 'Col4a1', 'Fgfr4', 'Col5a1', 'Bmpr2', 'Pcsk6', 'Ptprz1', 'Wisp3', 'Il6st', 'Sort1', 'Ltbp4', 'Il9r', 'Erbb3', 'Erbb4', 'Itga6', 'Pdgfra', 'Kl', 'Tek', 'Igfbpl1', 'Dear1', 'Igfbp5', 'Acvr2a', 'Igfals', 'Flt1', 'Col1a2', 'Col1a1', 'Flt4', 'Ptn', 'Egfr', 'Acvr2b', 'Col6a1']
GO:0008201	heparin binding	0.000168	0.0138	2.72	[Ptprf - protein tyrosine phosphatase, receptor type, f, Rtn4r - reticulon 4 receptor, Fn1 - fibronectin 1, Slit3 - slit homolog 3 (drosophila), Rspo2 - r-spondin 2 homolog (xenopus laevis), Rspo4 - r-spondin family, member 4, Tnxb - tenascin xb, Prelp - proline arginine-rich end leucine-rich repeat, Col5a1 - collagen, type v, alpha 1, Grem2 - gremlin 2 homolog, cysteine knot superfamily (xenopus…	['Ptprf', 'Rtn4r', 'Fn1', 'Slit3', 'Rspo2', 'Rspo4', 'Tnxb', 'Prelp', 'Col5a1', 'Grem2', 'Ptch1', 'Pcsk6', 'Col5a3', 'Fgf2', 'Ctsg', 'Fgf14', 'Wisp3', 'Hist1h1a', 'Fbn1', 'Col11a1']
GO:0005178	integrin binding	3.35e-08	1.19e-05	2.66	[L1cam - l1 cell adhesion molecule, Itga2 - integrin alpha 2, Itgbl1 - integrin, beta-like 1, Fn1 - fibronectin 1, Nf2 - neurofibromatosis 2, Kdr - kinase insert domain protein receptor, Itgb4 - integrin beta 4, Icam5 - intercellular adhesion molecule 5, telencephalin, Wisp1 - wnt1 inducible signaling pathway protein 1, Ibsp - integrin binding sialoprotein, Col3a1 - collagen, type iii, alpha 1, L…	['L1cam', 'Itga2', 'Itgbl1', 'Fn1', 'Nf2', 'Kdr', 'Itgb4', 'Icam5', 'Wisp1', 'Ibsp', 'Col3a1', 'Lamb1', 'Npnt', 'Col4a3', 'Fap', 'Tln2', 'Tnn', 'Prkca', 'Lama3', 'Ptprz1', 'Lama5', 'Fbln1', 'Wisp3', 'Jam2', 'Fbn1', 'Frmd5', 'Madcam1', 'Cdh17', 'Itga6', 'Cdh26', 'Utrn', 'Cd40lg', 'Gfra1', 'Casr', 'Gfap', 'Ptn', 'Fgf2', 'Igf1', 'Egfr']
GO:0004713	protein tyrosine kinase activity	4.28e-07	8.21e-05	2.58	[Ttbk1 - tau tubulin kinase 1, Jak2 - janus kinase 2, Kdr - kinase insert domain protein receptor, Ddr2 - discoidin domain receptor family, member 2, Abl1 - c-abl oncogene 1, non-receptor tyrosine kinase, Hipk2 - homeodomain interacting protein kinase 2, Mst1r - macrophage stimulating 1 receptor (c-met-related tyrosine kinase), Abl2 - v-abl abelson murine leukemia viral oncogene 2 (arg, abelson-r…	['Ttbk1', 'Jak2', 'Kdr', 'Ddr2', 'Abl1', 'Hipk2', 'Mst1r', 'Abl2', 'Ntrk2', 'Ret', 'Fgfr4', 'Dyrk2', 'Ptk6', 'Insrr', 'C230081A13Rik', 'Prkcd', 'Epha10', 'Ttn', 'Musk', 'Ephb2', 'Hipk4', 'Erbb3', 'Mertk', 'Erbb4', 'Pdgfra', 'Tie1', 'Tek', 'Dear1', 'Flt1', 'Flt4', 'Egfr', 'Epha3', 'Ror1', 'Map2k6', 'Ror2']
GO:0030165	PDZ domain binding	1.99e-05	0.0024	2.52	[Atp2b2 - atpase, ca++ transporting, plasma membrane 2, L1cam - l1 cell adhesion molecule, Exoc4 - exocyst complex component 4, Shisa6 - shisa homolog 6 (xenopus laevis), Dlgap3 - discs, large (drosophila) homolog-associated protein 3, Apba1 - amyloid beta (a4) precursor protein binding, family a, member 1, Atp2b4 - atpase, ca++ transporting, plasma membrane 4, Gria2 - glutamate receptor, ionotro…	['Atp2b2', 'L1cam', 'Exoc4', 'Shisa6', 'Dlgap3', 'Apba1', 'Atp2b4', 'Gria2', 'Gria1', 'Ccdc88c', 'Lphn2', 'Nlgn1', 'Bai1', 'Cit', 'Kirrel3', 'Sntb1', 'Musk', 'Ncoa2', 'Kidins220', 'Kcnj12', 'Dock4', 'Fzd4', 'Grid2', 'Acvr2a', 'Nos1ap', 'Kcnj9', 'Srr', 'Cxxc4', 'Atp2b3', 'Erc1']
GO:0008528	G protein-coupled peptide receptor activity	7.98e-05	0.0072	2.48	[Agtr2 - angiotensin ii receptor, type 2, Agtr1b - angiotensin ii receptor, type 1b, Cxcr1 - chemokine (c-x-c motif) receptor 1, Mrgprh - mas-related gpr, member h, Pth2r - parathyroid hormone 2 receptor, Prokr1 - prokineticin receptor 1, Cckbr - cholecystokinin b receptor, Aplnr - apelin receptor, Ackr4 - atypical chemokine receptor 4, Rxfp2 - relaxin/insulin-like family peptide receptor 2, Nmbr…	['Agtr2', 'Agtr1b', 'Cxcr1', 'Mrgprh', 'Pth2r', 'Prokr1', 'Cckbr', 'Aplnr', 'Ackr4', 'Rxfp2', 'Nmbr', 'Rxfp1', 'Npy4r', 'Ccr10', 'Ccr6', 'Avpr2', 'Dear1', 'Mc5r', 'Bdkrb2', 'Mrgpra4', 'Calcr', 'Galr2', 'Gpr75', 'Sstr4', 'Prokr2']
GO:0001653	peptide receptor activity	0.000133	0.0112	2.36	[Agtr2 - angiotensin ii receptor, type 2, Gucy2d - guanylate cyclase 2d, Agtr1b - angiotensin ii receptor, type 1b, Cxcr1 - chemokine (c-x-c motif) receptor 1, Mrgprh - mas-related gpr, member h, Pth2r - parathyroid hormone 2 receptor, Prokr1 - prokineticin receptor 1, Cckbr - cholecystokinin b receptor, Aplnr - apelin receptor, Ackr4 - atypical chemokine receptor 4, Rxfp2 - relaxin/insulin-like …	['Agtr2', 'Gucy2d', 'Agtr1b', 'Cxcr1', 'Mrgprh', 'Pth2r', 'Prokr1', 'Cckbr', 'Aplnr', 'Ackr4', 'Rxfp2', 'Nmbr', 'Rxfp1', 'Npy4r', 'Ccr10', 'Ccr6', 'Avpr2', 'Dear1', 'Mc5r', 'Bdkrb2', 'Mrgpra4', 'Galr2', 'Calcr', 'Sstr4', 'Gpr75', 'Prokr2']
GO:0008237	metallopeptidase activity	1.85e-06	0.000275	2.35	[Adamts3 - a disintegrin-like and metallopeptidase (reprolysin type) with thrombospondin type 1 motif, 3, Papln - papilin, proteoglycan-like sulfated glycoprotein, Adamts15 - a disintegrin-like and metallopeptidase (reprolysin type) with thrombospondin type 1 motif, 15, Adamts12 - a disintegrin-like and metallopeptidase (reprolysin type) with thrombospondin type 1 motif, 12, Adam19 - a disintegri…	['Adamts3', 'Papln', 'Adamts15', 'Adamts12', 'Adam19', 'Adam2', 'Mmp25', 'Adamts6', 'Lnpep', 'Adamtsl3', 'Mmp2', 'Mmp16', 'Mmp15', 'Adamtsl2', 'Ace', 'Lmln', 'Mme', 'Thsd4', 'Bmp1', 'Adamts16', 'Cpa2', 'Ide', 'Cpa3', 'Cpz', 'Naalad2', 'Adamts19', 'Pappa', 'Agbl1', 'Adamts2', 'Adamts9', 'Mmp9', 'Mmp28', 'Ermp1', 'Adamts4', 'Adamts18', 'Adamtsl1', 'Tll2', 'Cndp1']
GO:0050839	cell adhesion molecule binding	7.98e-10	4.59e-07	2.34	[Fn1 - fibronectin 1, Nf2 - neurofibromatosis 2, Obscn - obscurin, cytoskeletal calmodulin and titin-interacting rhogef, Wisp1 - wnt1 inducible signaling pathway protein 1, Npnt - nephronectin, Neo1 - neogenin, Fap - fibroblast activation protein, Tln2 - talin 2, Tnn - tenascin n, Postn - periostin, osteoblast specific factor, Prkca - protein kinase c, alpha, Nlgn1 - neuroligin 1, Nlgn3 - neuroli…	['Fn1', 'Nf2', 'Obscn', 'Wisp1', 'Npnt', 'Neo1', 'Fap', 'Tln2', 'Tnn', 'Postn', 'Prkca', 'Nlgn1', 'Nlgn3', 'Fbln1', 'Fbn1', 'Frmd5', 'Itga6', 'Tbc1d2', 'Cd40lg', 'Tenm4', 'Tenm3', 'L1cam', 'Itga2', 'Lphn1', 'Itgbl1', 'Kdr', 'Itga4', 'Icam5', 'Itgb4', 'Col3a1', 'Ibsp', 'Lamb1', 'Nos2', 'Col4a3', 'Bmpr2', 'Akap5', 'Lama3', 'Ptprz1', 'Lama5', 'Ptprt', 'Wisp3', 'Jam2', 'Fgb', 'Ptprf', 'Madcam1', 'Ptp…
GO:0015079	potassium ion transmembrane transporter activity	7.86e-05	0.00723	2.33	[Kcns1 - k+ voltage-gated channel, subfamily s, 1, Kcnq4 - potassium voltage-gated channel, subfamily q, member 4, Kcng1 - potassium voltage-gated channel, subfamily g, member 1, Hcn3 - hyperpolarization-activated, cyclic nucleotide-gated k+ 3, Kcnj14 - potassium inwardly-rectifying channel, subfamily j, member 14, Abcc9 - atp-binding cassette, sub-family c (cftr/mrp), member 9, Gria2 - glutamate…	['Kcns1', 'Kcnq4', 'Kcng1', 'Hcn3', 'Kcnj14', 'Abcc9', 'Gria2', 'Kcnh8', 'Kcnh6', 'Atp4a', 'Kcnv2', 'Slc24a5', 'Kcnq3', 'Slc9a2', 'Kcna3', 'Kcnb1', 'Kcnc1', 'Lrrc55', 'Trpm5', 'Kcnt2', 'Slc12a6', 'Kcng4', 'Kcnj12', 'Hcn4', 'Kcnj9', 'Grik3', 'Kcnma1', 'Kcnk7']
GO:0005516	calmodulin binding	1.14e-06	0.000187	2.33	[Atp2b2 - atpase, ca++ transporting, plasma membrane 2, Camk2a - calcium/calmodulin-dependent protein kinase ii alpha, Slc8a2 - solute carrier family 8 (sodium/calcium exchanger), member 2, Kcnq4 - potassium voltage-gated channel, subfamily q, member 4, Obscn - obscurin, cytoskeletal calmodulin and titin-interacting rhogef, Epb4.1 - erythrocyte protein band 4.1, Syt7 - synaptotagmin vii, Nos1 - n…	['Atp2b2', 'Camk2a', 'Slc8a2', 'Kcnq4', 'Obscn', 'Epb4.1', 'Syt7', 'Nos1', 'Nos2', 'Camk4', 'Myo1e', 'Atp2b4', 'Myh10', 'Akap5', 'Dapk1', 'Add2', 'Sntb2', 'Adcy3', 'Sntb1', 'Strn', 'Trpv1', 'Kcnq3', 'Myh6', 'Ceacam1', 'Ttn', 'Tjp1', 'Myh11', 'Phka1', 'Ryr1', 'Ryr3', 'Camsap1', 'Ubr4', 'Cacna1c', 'Iqgap2', 'Grin1', 'Camk1d', 'Myo1d', 'Egfr', 'Sptbn1', 'Sptan1', 'Akap12']
GO:0005539	glycosaminoglycan binding	0.000853	0.0553	2.29	[Ptprf - protein tyrosine phosphatase, receptor type, f, Rtn4r - reticulon 4 receptor, Fn1 - fibronectin 1, Vcan - versican, Slit3 - slit homolog 3 (drosophila), Hapln1 - hyaluronan and proteoglycan link protein 1, Rspo2 - r-spondin 2 homolog (xenopus laevis), Rspo4 - r-spondin family, member 4, Tnxb - tenascin xb, Col5a1 - collagen, type v, alpha 1, Prelp - proline arginine-rich end leucine-rich…	['Ptprf', 'Rtn4r', 'Fn1', 'Vcan', 'Slit3', 'Hapln1', 'Rspo2', 'Rspo4', 'Tnxb', 'Col5a1', 'Prelp', 'Grem2', 'Pcsk6', 'Ptch1', 'Sema5a', 'Col5a3', 'Fgf2', 'Ctsg', 'Wisp3', 'Fgf14', 'Hist1h1a', 'Fbn1', 'Col11a1']
GO:0005088		4.44e-05	0.00454	2.28	[Obscn - obscurin, cytoskeletal calmodulin and titin-interacting rhogef, Dennd4b - denn/madd domain containing 4b, Farp1 - ferm, rhogef (arhgef) and pleckstrin domain protein 1 (chondrocyte-derived), Dnmbp - dynamin binding protein, Fgd4 - fyve, rhogef and ph domain containing 4, Trio - triple functional domain (ptprf interacting), Rapgef5 - rap guanine nucleotide exchange factor (gef) 5, C030046…	['Obscn', 'Dennd4b', 'Farp1', 'Dnmbp', 'Fgd4', 'Trio', 'Rapgef5', 'C030046E11Rik', 'Ralgps1', 'Sbf1', 'Vav2', 'Spata13', 'Arhgef12', 'Als2', 'Rgl1', 'Dock9', 'Sos1', 'Sos2', 'Arhgef37', 'Smcr8', 'Fgd3', 'Arhgef10', 'Plekhg1', 'Tiam1', 'Dock4', 'Dennd4c', 'Arhgef15', 'Fgd5', 'Arhgef9', 'Fgd1']
GO:0022836	gated channel activity	1.66e-07	3.63e-05	2.22	[Tmc2 - transmembrane channel-like gene family 2, Kcng1 - potassium voltage-gated channel, subfamily g, member 1, Clcn5 - chloride channel 5, Gabrq - gamma-aminobutyric acid (gaba) a receptor, subunit theta, Gria2 - glutamate receptor, ionotropic, ampa2 (alpha 2), Clcn6 - chloride channel 6, Kcnv2 - potassium channel, subfamily v, member 2, Clcn1 - chloride channel 1, Kcna3 - potassium voltage-ga…	['Tmc2', 'Kcng1', 'Clcn5', 'Gabrq', 'Gria2', 'Clcn6', 'Kcnv2', 'Clcn1', 'Kcna3', 'Piezo2', 'Chrna7', 'Ano7', 'Trpm5', 'Lrrc55', 'Cacna1e', 'Cacna1g', 'Cacna1b', 'Cacna1c', 'Grid2', 'Tpcn1', 'Grin1', 'Grik3', 'Cacna2d4', 'Grin2d', 'Cachd1', 'Chrna2', 'Erc1', 'Kcns1', 'Glra4', 'Kcnq4', 'Hcn3', 'Kcnj14', 'Kcnh8', 'Kcnh6', 'Gabrg1', 'Scn4a', 'Clic5', 'Kcnq3', 'Tmc5', 'Cacng7', 'Kcnb1', 'Ryr1', 'Kcnc1…
GO:0017048		2.98e-05	0.00351	2.1	[Obscn - obscurin, cytoskeletal calmodulin and titin-interacting rhogef, Farp1 - ferm, rhogef (arhgef) and pleckstrin domain protein 1 (chondrocyte-derived), Dnmbp - dynamin binding protein, Fgd4 - fyve, rhogef and ph domain containing 4, Trio - triple functional domain (ptprf interacting), Rock2 - rho-associated coiled-coil containing protein kinase 2, 4931406P16Rik - riken cdna 4931406p16 gene,…	['Obscn', 'Farp1', 'Dnmbp', 'Fgd4', 'Trio', 'Rock2', 'Nckap1', 'Elmo1', 'Vav2', 'Spata13', 'Arhgef12', 'Als2', 'Dock9', 'Kctd10', 'Nox1', 'Sos1', 'Sos2', 'Arhgef37', 'Fgd3', 'Arhgef10', 'Fmnl2', 'Plekhg1', 'Tiam1', 'Daam2', 'Dvl3', 'Ocrl', 'Dock4', 'Arhgef15', 'Iqgap2', 'Rab7', 'Arhgef9', 'Fgd5', 'Fgd1', 'Srgap1', 'Diap1', 'Cdkl5', 'Daam1']
GO:0005261	cation channel activity	3.85e-06	0.000537	2.1	[Tmc2 - transmembrane channel-like gene family 2, Kcng1 - potassium voltage-gated channel, subfamily g, member 1, Abcc9 - atp-binding cassette, sub-family c (cftr/mrp), member 9, Gria2 - glutamate receptor, ionotropic, ampa2 (alpha 2), Kcnv2 - potassium channel, subfamily v, member 2, Slc24a5 - solute carrier family 24, member 5, Pkd1 - polycystic kidney disease 1 homolog, Kcna3 - potassium volta…	['Tmc2', 'Kcng1', 'Abcc9', 'Gria2', 'Kcnv2', 'Slc24a5', 'Pkd1', 'Kcna3', 'Piezo2', 'Chrna7', 'Lrrc55', 'Trpm5', 'Cacna1e', 'Cacna1g', 'Cacna1b', 'Cacna1c', 'Tpcn1', 'Grin1', 'Grik3', 'Cacna2d4', 'Grin2d', 'Cachd1', 'Chrna2', 'Erc1', 'Kcns1', 'Trpm6', 'Kcnq4', 'Hcn3', 'Trpm3', 'Kcnj14', 'Kcnh8', 'Kcnh6', 'Scn4a', 'Kcnq3', 'Cacng7', 'Kcnb1', 'Ryr1', 'Kcnc1', 'Ryr3', 'Kcnt2', 'Kcng4', 'Cnga3', 'Kcnj…
GO:0022839	on gated channel activity	7.12e-07	0.000126	2.07	[Tmc2 - transmembrane channel-like gene family 2, Kcng1 - potassium voltage-gated channel, subfamily g, member 1, Clcn5 - chloride channel 5, Gabrq - gamma-aminobutyric acid (gaba) a receptor, subunit theta, Gria2 - glutamate receptor, ionotropic, ampa2 (alpha 2), Gria1 - glutamate receptor, ionotropic, ampa1 (alpha 1), Clcn6 - chloride channel 6, Kcnv2 - potassium channel, subfamily v, member 2,…	['Tmc2', 'Kcng1', 'Clcn5', 'Gabrq', 'Gria2', 'Gria1', 'Clcn6', 'Kcnv2', 'Clcn1', 'Kcna3', 'Chrna7', 'Ano7', 'Cacng5', 'Trpm5', 'Lrrc55', 'Ttyh3', 'Cacna1e', 'Cacna1g', 'Cacna1b', 'Cacna1c', 'Grid2', 'Gria4', 'Tpcn1', 'Grin1', 'Grik3', 'Cacna2d4', 'Grin2d', 'Cachd1', 'Chrna2', 'Erc1', 'Kcns1', 'Glra4', 'Kcnq4', 'Hcn3', 'Kcnj14', 'Kcnh8', 'Kcnh6', 'Gabrg1', 'Clic5', 'Scn4a', 'Kcnq3', 'Trpv1', 'Kcnd…
GO:0005085	guanyl-nucleotide exchange factor activity	1.64e-05	0.00204	2.05	[E330009J07Rik - riken cdna e330009j07 gene, Obscn - obscurin, cytoskeletal calmodulin and titin-interacting rhogef, Dennd4b - denn/madd domain containing 4b, Farp1 - ferm, rhogef (arhgef) and pleckstrin domain protein 1 (chondrocyte-derived), D10Bwg1379e - dna segment, chr 10, brigham & women's genetics 1379 expressed, Dnmbp - dynamin binding protein, Fgd4 - fyve, rhogef and ph domain containing…	['E330009J07Rik', 'Obscn', 'Dennd4b', 'Farp1', 'D10Bwg1379e', 'Dnmbp', 'Fgd4', 'Trio', 'Rapgef5', 'C030046E11Rik', 'Ccdc88c', 'Ralgps1', 'Sbf1', 'Vav2', 'Arhgef12', 'Spata13', 'Dock1', 'Als2', 'Rgl1', 'Rapgefl1', 'Psd2', 'Dock9', 'Sos1', 'Chrm4', 'Sos2', 'Arhgef37', 'Smcr8', 'Fgd3', 'Arhgef10', 'Plekhg1', 'Tiam1', 'Dock4', 'Dennd4c', 'Arhgef15', 'Iqsec1', 'Plce1', 'Fgd5', 'Arhgef9', 'Fgd1', 'Psd3…
GO:0022838		3.99e-08	1.31e-05	1.93	[Tmc2 - transmembrane channel-like gene family 2, Kcng1 - potassium voltage-gated channel, subfamily g, member 1, Clcn5 - chloride channel 5, Gabrq - gamma-aminobutyric acid (gaba) a receptor, subunit theta, Abcc9 - atp-binding cassette, sub-family c (cftr/mrp), member 9, Lrrc8c - leucine rich repeat containing 8 family, member c, Gria2 - glutamate receptor, ionotropic, ampa2 (alpha 2), Gria1 - g…	['Tmc2', 'Kcng1', 'Clcn5', 'Gabrq', 'Abcc9', 'Lrrc8c', 'Gria2', 'Gria1', 'Clcn6', 'Kcnv2', 'Slc24a5', 'Best3', 'Aqp4', 'Pkd1', 'Clcn1', 'Aqp3', 'Trpv3', 'Kcna3', 'Piezo2', 'Aqp7', 'Chrna7', 'Ano7', 'Cacng5', 'Trpm5', 'Lrrc55', 'Ttyh3', 'Cacna1e', 'Ano3', 'Cacna1g', 'Cacna1b', 'Cacna1c', 'Grid2', 'Gria4', 'Tpcn1', 'Grin1', 'Scn7a', 'Grik3', 'Cacna2d4', 'Grin2d', 'Cachd1', 'Chrna2', 'Erc1', 'Kcns1'…
GO:0005216	ion channel activity	1.39e-07	3.2e-05	1.93	[Tmc2 - transmembrane channel-like gene family 2, Kcng1 - potassium voltage-gated channel, subfamily g, member 1, Clcn5 - chloride channel 5, Gabrq - gamma-aminobutyric acid (gaba) a receptor, subunit theta, Abcc9 - atp-binding cassette, sub-family c (cftr/mrp), member 9, Lrrc8c - leucine rich repeat containing 8 family, member c, Gria2 - glutamate receptor, ionotropic, ampa2 (alpha 2), Gria1 - g…	['Tmc2', 'Kcng1', 'Clcn5', 'Gabrq', 'Abcc9', 'Lrrc8c', 'Gria2', 'Gria1', 'Clcn6', 'Kcnv2', 'Slc24a5', 'Best3', 'Pkd1', 'Clcn1', 'Trpv3', 'Kcna3', 'Piezo2', 'Chrna7', 'Ano7', 'Cacng5', 'Trpm5', 'Lrrc55', 'Ttyh3', 'Cacna1e', 'Ano3', 'Cacna1g', 'Cacna1b', 'Cacna1c', 'Grid2', 'Gria4', 'Tpcn1', 'Grin1', 'Grik3', 'Cacna2d4', 'Grin2d', 'Chrna2', 'Cachd1', 'Erc1', 'Kcns1', 'Glra4', 'Kcnq4', 'Trpm6', 'Hcn…
GO:0022803	passive transmembrane transporter activity	6.52e-08	2e-05	1.9	[Tmc2 - transmembrane channel-like gene family 2, Kcng1 - potassium voltage-gated channel, subfamily g, member 1, Clcn5 - chloride channel 5, Gje1 - gap junction protein, epsilon 1, Gabrq - gamma-aminobutyric acid (gaba) a receptor, subunit theta, Abcc9 - atp-binding cassette, sub-family c (cftr/mrp), member 9, Lrrc8c - leucine rich repeat containing 8 family, member c, Gria2 - glutamate receptor…	['Tmc2', 'Kcng1', 'Clcn5', 'Gje1', 'Gabrq', 'Abcc9', 'Lrrc8c', 'Gria2', 'Gria1', 'Clcn6', 'Kcnv2', 'Slc24a5', 'Best3', 'Aqp4', 'Pkd1', 'Clcn1', 'Aqp3', 'Trpv3', 'Kcna3', 'Piezo2', 'Chrna7', 'Ano7', 'Cacng5', 'Trpm5', 'Lrrc55', 'Ttyh3', 'Cacna1e', 'Ano3', 'Cacna1g', 'Cacna1b', 'Cacna1c', 'Grid2', 'Gria4', 'Tpcn1', 'Grin1', 'Grik3', 'Cacna2d4', 'Grin2d', 'Cachd1', 'Chrna2', 'Erc1', 'Kcns1', 'Glra4'…
GO:0015267	channel activity	6.52e-08	1.88e-05	1.9	[Tmc2 - transmembrane channel-like gene family 2, Kcng1 - potassium voltage-gated channel, subfamily g, member 1, Clcn5 - chloride channel 5, Gje1 - gap junction protein, epsilon 1, Gabrq - gamma-aminobutyric acid (gaba) a receptor, subunit theta, Abcc9 - atp-binding cassette, sub-family c (cftr/mrp), member 9, Lrrc8c - leucine rich repeat containing 8 family, member c, Gria2 - glutamate receptor…	['Tmc2', 'Kcng1', 'Clcn5', 'Gje1', 'Gabrq', 'Abcc9', 'Lrrc8c', 'Gria2', 'Gria1', 'Clcn6', 'Kcnv2', 'Slc24a5', 'Best3', 'Aqp4', 'Pkd1', 'Clcn1', 'Aqp3', 'Trpv3', 'Kcna3', 'Piezo2', 'Chrna7', 'Ano7', 'Cacng5', 'Trpm5', 'Lrrc55', 'Ttyh3', 'Cacna1e', 'Ano3', 'Cacna1g', 'Cacna1b', 'Cacna1c', 'Grid2', 'Gria4', 'Tpcn1', 'Grin1', 'Grik3', 'Cacna2d4', 'Grin2d', 'Cachd1', 'Chrna2', 'Erc1', 'Kcns1', 'Glra4'…
GO:0005198	structural molecule activity	2.03e-07	4.25e-05	1.83	[Otog - otogelin, Papln - papilin, proteoglycan-like sulfated glycoprotein, Fn1 - fibronectin 1, Lamc1 - laminin, gamma 1, Ntn1 - netrin 1, Sec31b - sec31 homolog b (s. cerevisiae), Npnt - nephronectin, Scara3 - scavenger receptor class a, member 3, Tln2 - talin 2, Pxdn - peroxidasin homolog (drosophila), Col5a3 - collagen, type v, alpha 3, Dag1 - dystroglycan 1, Nup160 - nucleoporin 160, Ppl - p…	['Otog', 'Papln', 'Fn1', 'Lamc1', 'Ntn1', 'Sec31b', 'Npnt', 'Scara3', 'Tln2', 'Pxdn', 'Col5a3', 'Dag1', 'Nup160', 'Ppl', 'Krt25', 'Zp3', 'Fbn2', 'Fbn1', 'Krt26', 'Tinag', 'Actbl2', 'Tecta', 'Pom121', 'Bglap', 'Mmrn1', 'Hspg2', 'Prelp', 'Crybg3', 'Reln', 'Col1a2', 'Col1a1', 'Krt20', 'Dst', 'Sh2b3', 'Col6a3', 'Col6a2', 'Col6a1', 'Erc1', 'Col5a2', 'Col12a1', 'Tubb4a', 'Col14a1', 'Sntg1', 'Vcan', 'Co…
GO:0005509	calcium ion binding	3.02e-08	1.16e-05	1.78	[Celsr2 - cadherin, egf lag seven-pass g-type receptor 2 (flamingo homolog, drosophila), Prrg3 - proline rich gla (g-carboxyglutamic acid) 3 (transmembrane), Dsc2 - desmocollin 2, Sned1 - sushi, nidogen and egf-like domains 1, Gsn - gelsolin, Man1a - mannosidase 1, alpha, Syt7 - synaptotagmin vii, Efhd1 - ef hand domain containing 1, Npnt - nephronectin, Dag1 - dystroglycan 1, Fbln1 - fibulin 1, …	['Celsr2', 'Prrg3', 'Dsc2', 'Sned1', 'Gsn', 'Man1a', 'Syt7', 'Efhd1', 'Npnt', 'Dag1', 'Fbln1', 'Fbn2', 'Fbn1', 'Fbln2', 'Capn13', 'Cacna1e', 'Hspg2', 'Cacna1b', 'Matn3', 'Notch2', 'Syt13', 'Hist1h1e', 'Notch3', 'Dsg1c', 'Masp2', 'Masp1', 'Dst', 'Cd248', 'Sulf2', 'Ehd2', 'Atp2b2', 'Cd93', 'Cbl', 'Notch1', 'Cib3', 'Megf8', 'Chp2', 'Clstn1', 'S100a7a', 'Pla2g12b', 'Ryr1', 'Ryr3', 'Cdh23', 'Nid1', 'N…
GO:0046873	metal ion transmembrane transporter activity	1.56e-05	0.002	1.7	[Tmc2 - transmembrane channel-like gene family 2, Kcng1 - potassium voltage-gated channel, subfamily g, member 1, Slc22a3 - solute carrier family 22 (organic cation transporter), member 3, Abcc9 - atp-binding cassette, sub-family c (cftr/mrp), member 9, Slc4a4 - solute carrier family 4 (anion exchanger), member 4, Atp2b4 - atpase, ca++ transporting, plasma membrane 4, Gria2 - glutamate receptor, …	['Tmc2', 'Kcng1', 'Slc22a3', 'Abcc9', 'Slc4a4', 'Atp2b4', 'Gria2', 'Slc41a1', 'Kcnv2', 'Slc5a2', 'Slc24a5', 'Slc6a2', 'Pkd1', 'Trpv3', 'Kcna3', 'Cacng5', 'Trpm5', 'Lrrc55', 'Cacna1e', 'Slc23a2', 'Cacna1g', 'Cacna1b', 'Cacna1c', 'Tpcn1', 'Nipal3', 'Slc4a9', 'Grin1', 'Scn7a', 'Grik3', 'Cacna2d4', 'Grin2d', 'Cachd1', 'Erc1', 'Atp2b3', 'Slc6a4', 'Atp2b2', 'Kcns1', 'Slc8a2', 'Trpm6', 'Kcnq4', 'Hcn3', …
GO:0003779	actin binding	3.37e-05	0.00369	1.67	[Enah - enabled homolog (drosophila), Myo16 - myosin xvi, Nf2 - neurofibromatosis 2, Epb4.1 - erythrocyte protein band 4.1, Gsn - gelsolin, Abl1 - c-abl oncogene 1, non-receptor tyrosine kinase, Fgd4 - fyve, rhogef and ph domain containing 4, Syne3 - spectrin repeat containing, nuclear envelope family member 3, Tln2 - talin 2, Myo1e - myosin ie, Svil - supervillin, Myh10 - myosin, heavy polypepti…	['Enah', 'Myo16', 'Nf2', 'Epb4.1', 'Gsn', 'Abl1', 'Fgd4', 'Syne3', 'Tln2', 'Myo1e', 'Svil', 'Myh10', 'Neb', 'Ace', 'Slc6a2', 'Ccin', 'Dag1', 'Ceacam1', 'Flnb', 'Coro2b', 'Klhl3', 'Shroom4', 'Fmnl2', 'Daam2', 'Wasf3', 'Sipa1l1', 'Myh7b', 'Mical2', 'Pof1b', 'Diap1', 'Dst', 'Tns1', 'Slc6a4', 'Sntg1', 'Wasf2', 'Lasp1', 'Plec', 'Myo7b', 'Nos2', 'Fhdc1', 'Clmn', 'Ssh1', 'Akap5', 'Antxr1', 'Jmy', 'Gjb6'…
GO:0015318	inorganic molecular entity transmembrane transporter activity	1.61e-06	0.000248	1.61	[Tmc2 - transmembrane channel-like gene family 2, Kcng1 - potassium voltage-gated channel, subfamily g, member 1, Clcn5 - chloride channel 5, Slc22a3 - solute carrier family 22 (organic cation transporter), member 3, Gabrq - gamma-aminobutyric acid (gaba) a receptor, subunit theta, Abcc9 - atp-binding cassette, sub-family c (cftr/mrp), member 9, Atp2b4 - atpase, ca++ transporting, plasma membrane…	['Tmc2', 'Kcng1', 'Clcn5', 'Slc22a3', 'Gabrq', 'Abcc9', 'Atp2b4', 'Clcn6', 'Slc41a1', 'Slc24a5', 'Slc6a2', 'Best3', 'Aqp4', 'Pkd1', 'Aqp3', 'Ceacam1', 'Clcn1', 'Abcc4', 'Piezo2', 'Chrna7', 'Lrrc55', 'Trpm5', 'Cacna1e', 'Cacna1g', 'Slc38a11', 'Cacna1b', 'Slc16a4', 'Cacna1c', 'Nipal3', 'Tpcn1', 'Slc16a7', 'Slc26a2', 'Slc25a32', 'Cachd1', 'Chrna2', 'Slc6a4', 'Atp2b2', 'Slc8a2', 'Kcnq4', 'Slc25a30', …
GO:0004672	protein kinase activity	3.19e-05	0.00358	1.61	[Jak2 - janus kinase 2, Ern1 - endoplasmic reticulum (er) to nucleus signalling 1, Camk2a - calcium/calmodulin-dependent protein kinase ii alpha, Obscn - obscurin, cytoskeletal calmodulin and titin-interacting rhogef, Stk24 - serine/threonine kinase 24, Ddr2 - discoidin domain receptor family, member 2, Hipk2 - homeodomain interacting protein kinase 2, Ulk1 - unc-51 like kinase 1, Abl2 - v-abl ab…	['Jak2', 'Ern1', 'Camk2a', 'Obscn', 'Stk24', 'Ddr2', 'Hipk2', 'Ulk1', 'Abl2', 'Ntrk2', 'D8Ertd82e', 'Camk4', 'Rock2', 'Nek4', 'Insrr', 'Prkca', 'Cdk14', 'Dapk1', 'Cit', 'Prkcd', 'Akt3', 'Nek11', 'Mark4', 'Ephb2', 'Aak1', 'Alpk2', 'Hipk4', 'Wnk2', 'Pdgfra', 'Lmtk2', 'Sik2', 'Uhmk1', 'Tek', 'Stk10', 'Map4k2', 'Scyl2', 'Ttbk2', 'Map3k4', 'Flt1', 'Acvr2a', 'Map3k3', 'Flt4', 'Ulk2', 'Stk32b', 'Cdk19',…
GO:0022890	inorganic cation transmembrane transporter activity	0.000127	0.0108	1.59	[Tmc2 - transmembrane channel-like gene family 2, Kcng1 - potassium voltage-gated channel, subfamily g, member 1, Clcn5 - chloride channel 5, Slc22a3 - solute carrier family 22 (organic cation transporter), member 3, Abcc9 - atp-binding cassette, sub-family c (cftr/mrp), member 9, Slc4a4 - solute carrier family 4 (anion exchanger), member 4, Atp2b4 - atpase, ca++ transporting, plasma membrane 4, …	['Tmc2', 'Kcng1', 'Clcn5', 'Slc22a3', 'Abcc9', 'Slc4a4', 'Atp2b4', 'Gria2', 'Gria1', 'Slc41a1', 'Kcnv2', 'Slc24a5', 'Slc6a2', 'Pkd1', 'Kcna3', 'Atp6v0a2', 'Piezo2', 'Chrna7', 'Cacng5', 'Trpm5', 'Lrrc55', 'Cacna1e', 'Slc23a2', 'Cacna1g', 'Cacna1b', 'Cacna1c', 'Gria4', 'Tpcn1', 'Nipal3', 'Slc4a9', 'Grin1', 'Grik3', 'Cacna2d4', 'Grin2d', 'Cachd1', 'Chrna2', 'Erc1', 'Atp2b3', 'Slc6a4', 'Atp2b2', 'Kcn…
GO:0017016		0.000585	0.0402	1.58	[Obscn - obscurin, cytoskeletal calmodulin and titin-interacting rhogef, Farp1 - ferm, rhogef (arhgef) and pleckstrin domain protein 1 (chondrocyte-derived), Exph5 - exophilin 5, Dnmbp - dynamin binding protein, Fgd4 - fyve, rhogef and ph domain containing 4, Ulk1 - unc-51 like kinase 1, Rapgef5 - rap guanine nucleotide exchange factor (gef) 5, Rock2 - rho-associated coiled-coil containing protei…	['Obscn', 'Farp1', 'Exph5', 'Dnmbp', 'Fgd4', 'Ulk1', 'Rapgef5', 'Rock2', 'Sbf1', 'Rab11fip4', 'Arhgef12', 'Spata13', 'Als2', 'Sytl5', 'Dock9', 'Kctd10', 'Nox1', 'Sos1', 'Sos2', 'Arhgef37', 'Arhgef10', 'Fmnl2', 'Dvl3', 'Daam2', 'Tbc1d2', 'Rab11fip3', 'Dennd4c', 'Tbc1d20', 'Plce1', 'Arhgef9', 'Rab7', 'Diap1', 'Dgki', 'Cdkl5', 'Clec16a', 'Tbck', 'Tnpo1', 'Erc1', 'Exoc4', 'Dennd4b', 'Rims3', 'Trio', …
GO:0031267	small GTPase binding	0.000591	0.04	1.57	[Obscn - obscurin, cytoskeletal calmodulin and titin-interacting rhogef, Farp1 - ferm, rhogef (arhgef) and pleckstrin domain protein 1 (chondrocyte-derived), Exph5 - exophilin 5, Dnmbp - dynamin binding protein, Fgd4 - fyve, rhogef and ph domain containing 4, Ulk1 - unc-51 like kinase 1, Rapgef5 - rap guanine nucleotide exchange factor (gef) 5, Rock2 - rho-associated coiled-coil containing protei…	['Obscn', 'Farp1', 'Exph5', 'Dnmbp', 'Fgd4', 'Ulk1', 'Rapgef5', 'Rock2', 'Gria1', 'Sbf1', 'Rab11fip4', 'Arhgef12', 'Spata13', 'Als2', 'Sytl5', 'Dock9', 'Kctd10', 'Nox1', 'Sos1', 'Sos2', 'Arhgef37', 'Arhgef10', 'Fmnl2', 'Sorl1', 'Dvl3', 'Daam2', 'Tbc1d2', 'Rab11fip3', 'Dennd4c', 'Tbc1d20', 'Plce1', 'Arhgef9', 'Rab7', 'Diap1', 'Dgki', 'Cdkl5', 'Clec16a', 'Tbck', 'Tnpo1', 'Erc1', 'Exoc4', 'Dennd4b',…
GO:0016773	phosphotransferase activity, alcohol group as acceptor	5.87e-06	0.000795	1.57	[Camk2a - calcium/calmodulin-dependent protein kinase ii alpha, Stk24 - serine/threonine kinase 24, Ddr2 - discoidin domain receptor family, member 2, Abl1 - c-abl oncogene 1, non-receptor tyrosine kinase, Abl2 - v-abl abelson murine leukemia viral oncogene 2 (arg, abelson-related gene), Ulk1 - unc-51 like kinase 1, Mst1r - macrophage stimulating 1 receptor (c-met-related tyrosine kinase), Ntrk2 …	['Camk2a', 'Stk24', 'Ddr2', 'Abl1', 'Abl2', 'Ulk1', 'Mst1r', 'Ntrk2', 'D8Ertd82e', 'Camk4', 'Rock2', 'Prkca', 'Cdk14', 'Prkcd', 'Akt3', 'Cit', 'Musk', 'Nek11', 'Aak1', 'Alpk2', 'Aurkc', 'Lmtk2', 'Pdgfra', 'Uhmk1', 'Tek', 'Stk10', 'Map4k2', 'Acvr2a', 'Map3k4', 'Map3k3', 'Pip5k1c', 'Dgki', 'Acvr2b', 'Cdkl5', 'Map2k6', 'Rps6ka2', 'Dgkq', 'Gck', 'Ptk6', 'Map3k10', 'Ly6g6e', 'Epha10', 'Pfkfb3', 'N4bp2…
GO:0008270	zinc ion binding	6.09e-05	0.00584	1.57	[Hdac4 - histone deacetylase 4, Adamts15 - a disintegrin-like and metallopeptidase (reprolysin type) with thrombospondin type 1 motif, 15, Trim14 - tripartite motif-containing 14, Ar - androgen receptor, Ppara - peroxisome proliferator activated receptor alpha, Drp2 - dystrophin related protein 2, Ikzf4 - ikaros family zinc finger 4, Otud7a - otu domain containing 7a, Tet1 - tet methylcytosine di…	['Hdac4', 'Adamts15', 'Trim14', 'Ar', 'Ppara', 'Drp2', 'Ikzf4', 'Otud7a', 'Tet1', 'Esrrb', 'Rora', 'Zmiz2', 'Lig3', 'Mid1', 'Crebbp', 'Kat6a', 'Ubr5', 'Trim43c', 'Mmp2', 'Zfhx2', 'Upb1', 'Mmp16', 'Prkca', 'Mmp15', 'Prickle2', 'Nr2c2', 'Ptch1', 'Ace', 'Usp51', 'Traf3', 'Nsd1', 'Mme', 'Traf5', 'Nr3c2', 'Cpa3', 'Zcchc16', 'Car12', 'Phf2', 'Zfp385b', 'Zfhx4', 'Cpz', 'Nr5a2', 'Ski', 'Trim75', 'Adamts2…
GO:0051020	GTPase binding	0.000216	0.0174	1.55	[Obscn - obscurin, cytoskeletal calmodulin and titin-interacting rhogef, Farp1 - ferm, rhogef (arhgef) and pleckstrin domain protein 1 (chondrocyte-derived), D10Bwg1379e - dna segment, chr 10, brigham & women's genetics 1379 expressed, Exph5 - exophilin 5, Dnmbp - dynamin binding protein, Ulk1 - unc-51 like kinase 1, Eno1 - enolase 1, alpha non-neuron, Fgd4 - fyve, rhogef and ph domain containing…	['Obscn', 'Farp1', 'D10Bwg1379e', 'Exph5', 'Dnmbp', 'Ulk1', 'Eno1', 'Fgd4', 'Rapgef5', 'Rock2', 'Gria1', 'Ccdc88c', 'Sbf1', 'Rab11fip4', 'Spata13', 'Arhgef12', 'Als2', 'Rapgefl1', 'Sytl5', 'Dock9', 'Psd2', 'Kctd10', 'Nox1', 'Chrm4', 'Sos1', 'Sos2', 'Arhgef37', 'Arhgef10', 'Fmnl2', 'Sorl1', 'Daam2', 'Dvl3', 'Tbc1d2', 'Rab11fip3', 'Dennd4c', 'Tbc1d20', 'Plce1', 'Arhgef9', 'Rab7', 'Psd3', 'Arfgef1',…
GO:0022857	transmembrane transporter activity	2.41e-06	0.000347	1.5	[Tmc2 - transmembrane channel-like gene family 2, Kcng1 - potassium voltage-gated channel, subfamily g, member 1, Abca2 - atp-binding cassette, sub-family a (abc1), member 2, Clcn5 - chloride channel 5, Slc22a3 - solute carrier family 22 (organic cation transporter), member 3, Gje1 - gap junction protein, epsilon 1, Gabrq - gamma-aminobutyric acid (gaba) a receptor, subunit theta, Abcc9 - atp-bin…	['Tmc2', 'Kcng1', 'Abca2', 'Clcn5', 'Slc22a3', 'Gje1', 'Gabrq', 'Abcc9', 'Atp2b4', 'Abca6', 'Slc41a1', 'Clcn6', 'Slc24a5', 'Slc6a2', 'Best3', 'Aqp4', 'Pkd1', 'Aqp3', 'Ceacam1', 'Clcn1', 'Trpv3', 'Abcc4', 'Piezo2', 'Chrna7', 'Lrrc55', 'Slc25a31', 'Trpm5', 'Cacna1e', 'Cacna1g', 'Slc38a11', 'Abca3', 'Cacna1b', 'Abca8b', 'Slc16a4', 'Cacna1c', 'Nipal3', 'Tpcn1', 'Slc16a7', 'Slc26a2', 'Slc25a36', 'Chrn…
GO:0016301	kinase activity	8.79e-05	0.00778	1.48	[Uprt - uracil phosphoribosyltransferase (fur1) homolog (s. cerevisiae), Camk2a - calcium/calmodulin-dependent protein kinase ii alpha, Stk24 - serine/threonine kinase 24, Ddr2 - discoidin domain receptor family, member 2, Abl1 - c-abl oncogene 1, non-receptor tyrosine kinase, Abl2 - v-abl abelson murine leukemia viral oncogene 2 (arg, abelson-related gene), Ulk1 - unc-51 like kinase 1, Mst1r - m…	['Uprt', 'Camk2a', 'Stk24', 'Ddr2', 'Abl1', 'Abl2', 'Ulk1', 'Mst1r', 'Ntrk2', 'D8Ertd82e', 'Camk4', 'Rock2', 'Prkca', 'Cdk14', 'Prkcd', 'Akt3', 'Cit', 'Musk', 'Nek11', 'Aak1', 'Alpk2', 'Aurkc', 'Lmtk2', 'Pdgfra', 'Uhmk1', 'Tek', 'Stk10', 'Map4k2', 'Acvr2a', 'Map3k4', 'Map3k3', 'Pip5k1c', 'Dgki', 'Acvr2b', 'Cdkl5', 'Map2k6', 'Rps6ka2', 'Dgkq', 'Gck', 'Ptk6', 'Map3k10', 'Ly6g6e', 'Epha10', 'Pfkfb3'…
GO:0015075	ion transmembrane transporter activity	9.13e-05	0.00793	1.47	[Tmc2 - transmembrane channel-like gene family 2, Kcng1 - potassium voltage-gated channel, subfamily g, member 1, Clcn5 - chloride channel 5, Slc22a3 - solute carrier family 22 (organic cation transporter), member 3, Gabrq - gamma-aminobutyric acid (gaba) a receptor, subunit theta, Abcc9 - atp-binding cassette, sub-family c (cftr/mrp), member 9, Atp2b4 - atpase, ca++ transporting, plasma membrane…	['Tmc2', 'Kcng1', 'Clcn5', 'Slc22a3', 'Gabrq', 'Abcc9', 'Atp2b4', 'Clcn6', 'Slc41a1', 'Slc24a5', 'Slc6a2', 'Best3', 'Pkd1', 'Ceacam1', 'Clcn1', 'Trpv3', 'Abcc4', 'Piezo2', 'Chrna7', 'Lrrc55', 'Trpm5', 'Cacna1e', 'Cacna1g', 'Slc38a11', 'Cacna1b', 'Slc16a4', 'Cacna1c', 'Nipal3', 'Tpcn1', 'Slc16a7', 'Slc26a2', 'Slc25a32', 'Cachd1', 'Chrna2', 'Slc6a4', 'Atp2b2', 'Slc8a2', 'Kcnq4', 'Slc41a3', 'Slc25a3…
GO:0005215	transporter activity	1.05e-05	0.00139	1.45	[Tmc2 - transmembrane channel-like gene family 2, Kcng1 - potassium voltage-gated channel, subfamily g, member 1, Spns2 - spinster homolog 2, Abca2 - atp-binding cassette, sub-family a (abc1), member 2, Clcn5 - chloride channel 5, Slc22a3 - solute carrier family 22 (organic cation transporter), member 3, Gje1 - gap junction protein, epsilon 1, Gabrq - gamma-aminobutyric acid (gaba) a receptor, su…	['Tmc2', 'Kcng1', 'Spns2', 'Abca2', 'Clcn5', 'Slc22a3', 'Gje1', 'Gabrq', 'Abcc9', 'Atp2b4', 'Abca6', 'Slc41a1', 'Clcn6', 'Slc24a5', 'Slc6a2', 'Best3', 'Aqp4', 'Pkd1', 'Aqp3', 'Ceacam1', 'Clcn1', 'Trpv3', 'Abcc4', 'Piezo2', 'Chrna7', 'Slc25a31', 'Lrrc55', 'Slc27a6', 'Trpm5', 'Cacna1e', 'Cacna1g', 'Slc38a11', 'Abca3', 'Cacna1b', 'Abca8b', 'Slc16a4', 'Cacna1c', 'Nipal3', 'Tpcn1', 'Slc16a7', 'Npc1', …
GO:0005102	signaling receptor binding	2.72e-07	5.45e-05	1.43	[Camk2a - calcium/calmodulin-dependent protein kinase ii alpha, Ntn3 - netrin 3, Sned1 - sushi, nidogen and egf-like domains 1, Gprc5c - g protein-coupled receptor, family c, group 5, member c, Ntrk2 - neurotrophic tyrosine kinase, receptor, type 2, Tnn - tenascin n, Ptch1 - patched homolog 1, Ace - angiotensin i converting enzyme (peptidyl-dipeptidase a) 1, Fbln1 - fibulin 1, Nsd1 - nuclear rece…	['Camk2a', 'Ntn3', 'Sned1', 'Gprc5c', 'Ntrk2', 'Tnn', 'Ptch1', 'Ace', 'Fbln1', 'Nsd1', 'Sytl5', 'Psca', 'Zp3', 'Fbn1', 'Nppc', 'Aak1', 'Nts', 'Flrt1', 'Itga2', 'Izumo1', 'Cbl', 'Notch1', 'Nr4a3', 'Grem2', 'Ly6g6e', 'Tacc2', 'Ptprz1', 'Cckbr', 'Irs1', 'Ep300', 'Spred2', 'Ptprf', 'Spred1', 'Rtn4r', 'Madcam1', 'Erbb3', 'Erbb4', 'Smad3', 'Tnfsf18', 'Esr1', 'Ptpn11', 'Casr', 'Ptn', 'Znrf3', 'Htt', 'Ma…
GO:0046872	metal ion binding	9.69e-14	1.11e-10	1.42	[Prrg3 - proline rich gla (g-carboxyglutamic acid) 3 (transmembrane), Hdac4 - histone deacetylase 4, Sned1 - sushi, nidogen and egf-like domains 1, Ikzf4 - ikaros family zinc finger 4, Man1a - mannosidase 1, alpha, Ptgs2 - prostaglandin-endoperoxide synthase 2, Gsn - gelsolin, Abl2 - v-abl abelson murine leukemia viral oncogene 2 (arg, abelson-related gene), Ace - angiotensin i converting enzyme …	['Prrg3', 'Hdac4', 'Sned1', 'Ikzf4', 'Man1a', 'Ptgs2', 'Gsn', 'Abl2', 'Ace', 'Ptch1', 'Dag1', 'Sytl5', 'Cyp8b1', 'Gbgt1', 'Nox1', 'Matn3', 'Zfp92', 'Masp2', 'Masp1', 'Thap2', 'Acvr2b', 'Cd248', 'Sulf2', 'Dct', 'Stac', 'Adam19', 'Cd93', 'Adarb1', 'Adcy7', 'Adcy9', 'Hivep1', 'Dgkq', 'Gen1', 'Piwil1', 'Cnot6', 'Chp2', 'Nebl', 'Pon3', 'Ido2', 'Naalad2', 'Zc3hav1l', 'Zfp142', 'Slfn9', 'Smad3', 'Pygo1'…
GO:0043169	cation binding	1.4e-13	1.29e-10	1.41	[Prrg3 - proline rich gla (g-carboxyglutamic acid) 3 (transmembrane), Hdac4 - histone deacetylase 4, Sned1 - sushi, nidogen and egf-like domains 1, Ikzf4 - ikaros family zinc finger 4, Man1a - mannosidase 1, alpha, Ptgs2 - prostaglandin-endoperoxide synthase 2, Gsn - gelsolin, Abl2 - v-abl abelson murine leukemia viral oncogene 2 (arg, abelson-related gene), Ace - angiotensin i converting enzyme …	['Prrg3', 'Hdac4', 'Sned1', 'Ikzf4', 'Man1a', 'Ptgs2', 'Gsn', 'Abl2', 'Ace', 'Ptch1', 'Dag1', 'Sytl5', 'Cyp8b1', 'Gbgt1', 'Chrna7', 'Nox1', 'Matn3', 'Zfp92', 'Masp2', 'Masp1', 'Thap2', 'Acvr2b', 'Cd248', 'Sulf2', 'Dct', 'Stac', 'Adam19', 'Cd93', 'Adarb1', 'Adcy7', 'Adcy9', 'Hivep1', 'Dgkq', 'Gen1', 'Piwil1', 'Cnot6', 'Chp2', 'Nebl', 'Pon3', 'Ido2', 'Naalad2', 'Zc3hav1l', 'Zfp142', 'Slfn9', 'Smad3…
GO:0008092	cytoskeletal protein binding	0.000259	0.0205	1.39	[Myo16 - myosin xvi, Trak2 - trafficking protein, kinesin binding 2, Epb4.1 - erythrocyte protein band 4.1, Farp1 - ferm, rhogef (arhgef) and pleckstrin domain protein 1 (chondrocyte-derived), Gsn - gelsolin, Abl1 - c-abl oncogene 1, non-receptor tyrosine kinase, Dpysl3 - dihydropyrimidinase-like 3, Syne3 - spectrin repeat containing, nuclear envelope family member 3, Myo1e - myosin ie, Svil - su…	['Myo16', 'Trak2', 'Epb4.1', 'Farp1', 'Gsn', 'Abl1', 'Dpysl3', 'Syne3', 'Myo1e', 'Svil', 'Capn6', 'Ace', 'Slc6a2', 'Ccin', 'Dag1', 'Trak1', 'Ceacam1', 'Hsph1', 'Kirrel', 'Flnb', 'Shroom4', 'Arhgef10', 'Lmtk2', 'Clip1', 'Cacna1c', 'Mical2', 'Tppp', 'Arfgef1', 'Pip5k1c', 'Snph', 'Dst', 'Slc6a4', 'Plec', 'Tubgcp4', 'Nos2', 'Cep350', 'Clmn', 'Ttll7', 'Akap5', 'Jmy', 'Ttll4', 'Dpysl5', 'Ptprt', 'Add2'…
GO:0044212		0.0003	0.0234	1.37	[Hdac4 - histone deacetylase 4, Ar - androgen receptor, Sall2 - sal-like 2 (drosophila), Ikzf4 - ikaros family zinc finger 4, Prdm2 - pr domain containing 2, with znf domain, Esrrb - estrogen related receptor, beta, Zfp957 - zinc finger protein 957, Nfat5 - nuclear factor of activated t cells 5, Rora - rar-related orphan receptor alpha, Carm1 - coactivator-associated arginine methyltransferase 1,…	['Hdac4', 'Ar', 'Sall2', 'Ikzf4', 'Prdm2', 'Esrrb', 'Zfp957', 'Nfat5', 'Rora', 'Carm1', 'Tbx20', 'Ago1', 'Zfhx2', 'Creb3l2', 'Nsd1', 'Med12', 'Zfp646', 'Tcf23', 'Zfp750', 'Zfhx4', 'Creb3l1', 'Klf3', 'Klf12', 'Nr5a2', 'Six4', 'Zfp704', 'Tead1', 'Kdm6b', 'Zfpm1', 'Grhl2', 'Tead4', 'Arnt2', 'Arntl', 'Ets1', 'Foxo3', 'Tcf20', 'Notch1', 'Foxj2', 'Nr4a3', 'Hivep1', 'Hcfc1', 'Zfp773', 'Srebf2', 'Cux2', …
GO:0001067	transcription regulatory region nucleic acid binding	0.000356	0.0264	1.37	[Hdac4 - histone deacetylase 4, Ar - androgen receptor, Sall2 - sal-like 2 (drosophila), Ikzf4 - ikaros family zinc finger 4, Prdm2 - pr domain containing 2, with znf domain, Esrrb - estrogen related receptor, beta, Zfp957 - zinc finger protein 957, Nfat5 - nuclear factor of activated t cells 5, Rora - rar-related orphan receptor alpha, Carm1 - coactivator-associated arginine methyltransferase 1,…	['Hdac4', 'Ar', 'Sall2', 'Ikzf4', 'Prdm2', 'Esrrb', 'Zfp957', 'Nfat5', 'Rora', 'Carm1', 'Tbx20', 'Ago1', 'Zfhx2', 'Creb3l2', 'Nsd1', 'Med12', 'Zfp646', 'Tcf23', 'Zfp750', 'Zfhx4', 'Klf3', 'Creb3l1', 'Klf12', 'Nr5a2', 'Six4', 'Zfp704', 'Tead1', 'Kdm6b', 'Zfpm1', 'Grhl2', 'Tead4', 'Arnt2', 'Arntl', 'Ets1', 'Foxo3', 'Tcf20', 'Notch1', 'Foxj2', 'Nr4a3', 'Hivep1', 'Hcfc1', 'Zfp773', 'Srebf2', 'Cux2', …
GO:0000976	transcription cis-regulatory region binding	0.000345	0.0265	1.37	[Hdac4 - histone deacetylase 4, Ar - androgen receptor, Sall2 - sal-like 2 (drosophila), Ikzf4 - ikaros family zinc finger 4, Prdm2 - pr domain containing 2, with znf domain, Esrrb - estrogen related receptor, beta, Zfp957 - zinc finger protein 957, Nfat5 - nuclear factor of activated t cells 5, Rora - rar-related orphan receptor alpha, Carm1 - coactivator-associated arginine methyltransferase 1,…	['Hdac4', 'Ar', 'Sall2', 'Ikzf4', 'Prdm2', 'Esrrb', 'Zfp957', 'Nfat5', 'Rora', 'Carm1', 'Tbx20', 'Ago1', 'Zfhx2', 'Creb3l2', 'Nsd1', 'Med12', 'Zfp646', 'Tcf23', 'Zfp750', 'Zfhx4', 'Klf3', 'Creb3l1', 'Klf12', 'Nr5a2', 'Six4', 'Zfp704', 'Tead1', 'Kdm6b', 'Zfpm1', 'Tead4', 'Arnt2', 'Arntl', 'Ets1', 'Foxo3', 'Tcf20', 'Notch1', 'Foxj2', 'Nr4a3', 'Hivep1', 'Hcfc1', 'Zfp773', 'Srebf2', 'Cux2', 'Nr1h5', …
GO:0044877	protein-containing complex binding	0.000486	0.035	1.3	[Gsn - gelsolin, Ddr2 - discoidin domain receptor family, member 2, Abl1 - c-abl oncogene 1, non-receptor tyrosine kinase, Hmbox1 - homeobox containing 1, Amer1 - apc membrane recruitment 1, Fap - fibroblast activation protein, Tnn - tenascin n, Ptch1 - patched homolog 1, Fcer2a - fc receptor, ige, low affinity ii, alpha polypeptide, Ms4a2 - membrane-spanning 4-domains, subfamily a, member 2, Fbl…	['Gsn', 'Ddr2', 'Abl1', 'Hmbox1', 'Amer1', 'Fap', 'Tnn', 'Ptch1', 'Fcer2a', 'Ms4a2', 'Fbln1', 'Musk', 'Fbn1', 'Aak1', 'Shroom4', 'Psme4', 'Ugt1a6b', 'Acvr2a', 'Acvr2b', 'Nptxr', 'Itga11', 'Itga2', 'Jmy', 'Piwil1', 'Mlc1', 'Ptprz1', 'Add2', 'Irs1', 'Nebl', 'Ep300', 'Xirp2', 'Ptprf', 'Rtn4r', 'Madcam1', 'Ecm2', 'Smad3', 'Nid1', 'Ptpn11', 'Esr1', 'Casr', 'Ptn', 'Avil', 'Tsc1', 'Amph', 'Sptbn1', 'Rxr…
GO:0140096	catalytic activity, acting on a protein	3.96e-05	0.00415	1.28	[Camk2a - calcium/calmodulin-dependent protein kinase ii alpha, LOC100504608 - protein fam119b-like, Hdac4 - histone deacetylase 4, Papln - papilin, proteoglycan-like sulfated glycoprotein, Stk24 - serine/threonine kinase 24, Otud7a - otu domain containing 7a, Ddr2 - discoidin domain receptor family, member 2, Abl1 - c-abl oncogene 1, non-receptor tyrosine kinase, Ntrk2 - neurotrophic tyrosine ki…	['Camk2a', 'LOC100504608', 'Hdac4', 'Papln', 'Stk24', 'Otud7a', 'Ddr2', 'Abl1', 'Ntrk2', 'Abl2', 'Mst1r', 'Camk4', 'Fap', 'Ppm1l', 'Rock2', 'Dusp8', 'Adam23', 'Otub2', 'Ace', 'Akt3', 'Nsd1', 'Musk', 'Gid4', 'Nek11', 'Eya4', 'Aak1', 'Dusp15', 'Aurkc', 'Lmtk2', 'Zdhhc5', 'Tek', 'Stk10', 'Eya1', 'Dot1l', 'Tmprss7', 'Tgm6', 'Acvr2a', 'Masp2', 'Masp1', 'Cdkl5', 'Acvr2b', 'Rps6ka2', 'Adam19', 'Zdhhc21'…
GO:0043167	ion binding	4.68e-12	3.07e-09	1.25	[Prrg3 - proline rich gla (g-carboxyglutamic acid) 3 (transmembrane), Hdac4 - histone deacetylase 4, Rhobtb2 - rho-related btb domain containing 2, Abca2 - atp-binding cassette, sub-family a (abc1), member 2, Acot12 - acyl-coa thioesterase 12, Sned1 - sushi, nidogen and egf-like domains 1, Epb4.1 - erythrocyte protein band 4.1, Ikzf4 - ikaros family zinc finger 4, Zscan20 - zinc finger and scan d…	['Prrg3', 'Hdac4', 'Rhobtb2', 'Abca2', 'Acot12', 'Sned1', 'Epb4.1', 'Ikzf4', 'Zscan20', 'Gsn', 'Ptgs2', 'Man1a', 'Abl1', 'Abl2', 'Abcc9', 'Amer1', 'Ptafr', 'Ptch1', 'Ace', 'Akt3', 'Tdrd12', 'Dag1', 'Sytl5', 'Nek11', 'Gbgt1', 'Cyp8b1', 'Nox1', 'Chrna7', 'Arl5a', 'Aak1', 'Aurkc', 'Stk10', 'Matn3', 'Ugt1a1', 'Zfp92', 'Tpcn1', 'Acvr2a', 'Zfpm1', 'Masp2', 'Masp1', 'Thap2', 'Acvr2b', 'Cd248', 'Sulf2', …
GO:0005515	protein binding	6.78e-13	5.2e-10	1.18	[Hdac4 - histone deacetylase 4, Ptgfrn - prostaglandin f2 receptor negative regulator, Sned1 - sushi, nidogen and egf-like domains 1, Epb4.1 - erythrocyte protein band 4.1, Acot12 - acyl-coa thioesterase 12, Ikzf4 - ikaros family zinc finger 4, Ptgs2 - prostaglandin-endoperoxide synthase 2, Gprc5c - g protein-coupled receptor, family c, group 5, member c, Abl1 - c-abl oncogene 1, non-receptor tyr…	['Hdac4', 'Ptgfrn', 'Sned1', 'Epb4.1', 'Acot12', 'Ikzf4', 'Ptgs2', 'Gprc5c', 'Abl1', 'Abl2', 'Ago1', 'Ptafr', 'Adam23', 'Ace', 'Ptch1', 'Akt3', 'Sytl5', 'Zp3r', 'Zp3', 'Nox1', 'Chrna7', 'Aak1', 'Shroom4', 'Megf10', 'Dot1l', 'Tmprss7', 'Duoxa2', 'Acvr2a', 'Arhgef9', 'Has3', 'Zfpm1', 'Krt20', 'Has2', 'Acvr2b', 'Cd248', 'Hcn3', 'Adam19', 'Ets1', 'Adam2', 'Rassf9', 'Hcfc1', 'Cep350', 'Lphn2', 'Gen1',…
GO:0005488	binding	5.02e-14	1.15e-10	1.12	[Ptgfrn - prostaglandin f2 receptor negative regulator, Abca2 - atp-binding cassette, sub-family a (abc1), member 2, Acot12 - acyl-coa thioesterase 12, H6pd - hexose-6-phosphate dehydrogenase (glucose 1-dehydrogenase), Ptgs2 - prostaglandin-endoperoxide synthase 2, Abl1 - c-abl oncogene 1, non-receptor tyrosine kinase, Abl2 - v-abl abelson murine leukemia viral oncogene 2 (arg, abelson-related ge…	['Ptgfrn', 'Abca2', 'Acot12', 'H6pd', 'Ptgs2', 'Abl1', 'Abl2', 'Ago1', 'Ptafr', 'Ptch1', 'Ace', 'Sytl5', 'Gm4906', 'Chrna7', 'Nox1', 'Acvr2a', 'Duoxa2', 'Arhgef9', 'Krt20', 'Thap2', 'Stard8', 'Acvr2b', 'Adam19', 'Adam2', 'Adcy7', 'Rassf9', 'Adcy9', 'Cep350', 'Lphn2', 'Il22ra2', 'Ptprs', 'Ptprz1', 'Paqr5', 'Ptprt', 'Add2', 'Nebl', 'Ptprf', 'Adra1a', 'Ptprb', 'Smcr8', 'Kcng4', 'Usp53', 'Slfn9', 'Pt…
GO:0019899	enzyme binding	0.000835	0.0549	1.22	[Hdac4 - histone deacetylase 4, Rhobtb2 - rho-related btb domain containing 2, Ppp1r12b - protein phosphatase 1, regulatory (inhibitor) subunit 12b, Ptgs2 - prostaglandin-endoperoxide synthase 2, Farp1 - ferm, rhogef (arhgef) and pleckstrin domain protein 1 (chondrocyte-derived), Dnmbp - dynamin binding protein, Abl1 - c-abl oncogene 1, non-receptor tyrosine kinase, Ntrk2 - neurotrophic tyrosine …	['Hdac4', 'Rhobtb2', 'Ppp1r12b', 'Ptgs2', 'Farp1', 'Dnmbp', 'Abl1', 'Ntrk2', 'Mst1r', 'Fap', 'Rock2', 'Dusp8', 'Ago1', 'Ptafr', 'Ace', 'Spata13', 'Akt3', 'Ms4a2', 'Sytl5', 'Musk', 'Zp3', 'Nox1', 'Chrna7', 'Arhgef37', 'Cacna1b', 'Cacna1c', 'Notch2', 'Ugt1a1', 'Notch3', 'Duoxa2', 'Arhgef9', 'Cdkl5', 'Nptxr', 'Ets1', 'Cbl', 'Cbs', 'Notch1', 'Rassf9', 'Nos1', 'Nos2', 'Nr4a3', 'Dgkq', 'Ralgps1', 'Piwi…
eTable S5 GOrilla Results from 6 to 28 months of age.
KEY: GO term = gene ontology term, FDR q-value = false discovery rate adjusted for multiple comparisons, enrichment = degree of change in GO term.
Data from GOrilla as explained in the main text.

## Sheet: eTableS6 GSEA 6m vs. 24m
pathway	gene id	base Mean	log2 Fold Change	lfc SE	stat	pvalue	padj		eTable S6 GSEA Results from 6 to 24 months of age.
LIT_MM_COVENEY_XY-WNT4_XX-WNT4-GONAD_VS_XX-WNT4_UP	LY6G6E	15.13	-1.6	0.29	-5.57	2.61e-08	3.08e-05		KEY: pathway = GSEA pathway. lfc SE = standard error of the log2 fold change, padj = pvalue adjusted for multiple comparisons.
LIT_MM_YAO_BDF1-MOUSE_TESTIS_FUNCTION_DIFF	1700001O22RIK	362.51	-1.59	0.38	-4.16	3.21e-05	0.00628		Data from GSEA as explained in the main text.
LIT_MM_PORTER_DIAPHRAGM_VS_HINDLIMB-MUSCLE_DIFF	GREM2	100.16	-1.42	0.36	-3.89	0.000101	0.0148
LIT_MM_TSUCHIYA_DF-CR-DF-CR_HEPATIC_DIFF	GCK	119.04	-1.4	0.24	-5.74	9.3e-09	1.61e-05
LIT_MM_RECINOS_LIVER_DIETARY-FAT_LDLR-PLUS_VS_PLUS-HF-LF_DN	SLC38A4	2766.01	-1.04	0.28	-3.77	0.000162	0.0204
LIT_MM_TOMCZAK_MYOGENIC_2D_C3_DIFF	TRP63	325.8	1	0.29	3.51	0.000447	0.0369
LIT_MM_LEE_HUNTINGTIN_POLYGLUTAMINE-TRACT_STRIATAL-CELL_DN	CCDC122	85.77	1.02	0.26	4	6.45e-05	0.0105
LIT_MM_BALBIR_AJ_VS_DBA_UP	FAM196B	25.32	1.03	0.27	3.83	0.000128	0.0176
LIT_MM_COSTOYA_BV2_ZFP145-PLUS_VS_ZFP145-MINUS_UP	2010300C02RIK	51.32	1.03	0.22	4.64	3.53e-06	0.00137
LIT_MM_EDWARDS_CD4_VS_CD8ALPHA_DN	HELLS	15.8	1.04	0.31	3.39	0.000698	0.05
LIT_MM_BAUER_ENZYMES_UREA-CYCLE_AMINO-ACID_METABOLISM_DIFF	CAR1	15.83	1.04	0.29	3.58	0.000345	0.0317
LIT_MM_HOFFMANN_T-CELL_LYMPHOCYTE_C10_DIFF	RB1	1013.6	1.04	0.3	3.43	0.000604	0.0456
LIT_MM_EAVES_IDD3-5_VS_NOD_THYMUS_DN	CAR3	96814.8	1.05	0.22	4.87	1.11e-06	0.000568
LIT_MM_RIVOLTA_COCHLEAR_HAIR_DAY9_UP	ID2	151.67	1.06	0.29	3.63	0.000284	0.028
LIT_MM_EDWARDS_CD4_VS_CD8ALPHA_UP	POU2F2	21.02	1.11	0.32	3.51	0.000454	0.0373
LIT_MM_FANG_LACRIMAL-GLAND_CORNEAL-TRAUMA-3TIMES_DIFF	SPINT2	136.32	1.13	0.3	3.72	0.000201	0.0228
LIT_MM_COSTOYA_BV2_ZFP145-PLUS_VS_ZFP145-MINUS_UP	DEPDC7	97.93	1.13	0.28	4.01	5.98e-05	0.00999
LIT_MM_MCCABE_WTPRE_VS_RB-PRE-CELL_SERUM_DN	CYR61	1476.01	1.14	0.21	5.37	7.71e-08	6.97e-05
LIT_MM_LANG_SOCS3_VS_MACROPHAGES_400TREATMENT_IL-6_UP	BID	25.77	1.14	0.31	3.68	0.000229	0.0246
LIT_MM_ZHU_LBP_LP_DIFF	SPATA24	94.16	1.14	0.32	3.58	0.000347	0.0317
LIT_MM_TURK_HINDLIMB-MUSCLE_DYSTROPHIN-DEFICIENT_DIFF	GALNS	61.22	1.17	0.34	3.44	0.000586	0.0447
LIT_MM_TOMCZAK_MYOGENIC_2D_C4_DIFF	SPSB2	133.64	1.18	0.33	3.54	0.000399	0.0349
LIT_MM_HOFFMANN_B-CELL_LYMPHOCYTE_C17_DIFF	HIP1R	504.59	1.19	0.28	4.28	1.87e-05	0.00437
MSIGDB_MM_ACEVEDO_FGFR1_TARGETS_IN_PROSTATE_CANCER_MODEL_UP	OBFC2A	732.28	1.2	0.34	3.56	0.000373	0.0337
LIT_MM_STEVENSON_MYOTUBE-STARVATION_ATROPHY_FUNCTION_UP	SLC7A5	96.97	1.22	0.31	3.92	8.87e-05	0.0132
LIT_MM_HOFFMANN_T-CELL_LYMPHOCYTE_C13_DIFF	CD28	44.19	1.24	0.36	3.42	0.000635	0.0469
LIT_MM_MIJALSKI_16DUAL-COLOR_HYBRIDIZATIONS_KIDNEY_UP	TMEM8	69.05	1.29	0.28	4.6	4.33e-06	0.00158
LIT_MM_TURK_HINDLIMB-MUSCLE_DYSTROPHIN-DEFICIENT_DIFF	SCAMP5	68.4	1.31	0.33	4.03	5.59e-05	0.00954
LIT_MM_YAMAGATA_AGONIST_NK-RELATED_STIMULATORY_UP	LAG3	11.75	1.32	0.38	3.46	0.000537	0.042
LIT_MM_TOMCZAK_MYOGENIC_2D_C3_DIFF	MUSTN1	3164.12	1.35	0.38	3.6	0.000314	0.0295
LIT_MM_TOMCZAK_MYOGENIC_2D_C2_DIFF	RAB13	349.74	1.37	0.4	3.46	0.000547	0.0424
LIT_MM_OWENS_TUMOR_VS_LUTEOMA_UP	GDNF	45.73	1.38	0.35	3.93	8.49e-05	0.0128
LIT_MM_GOLDRATH_MEMORY_ANTIGEN-DRIVEN_ACTIVATION-OT-I-CD8-T-CELL_DIFF	PRKCZ	86.71	1.38	0.27	5.1	3.37e-07	0.000216
LIT_MM_RENTHAL_COCAINE-HDAC5KO_COCAINE_DN	OSTN	408.54	1.38	0.23	6.01	1.91e-09	4.19e-06
LIT_MM_ZHU_LPS_IFN-2_MA_PGE2_ISO_DIFF	SLC37A2	69.49	1.45	0.42	3.46	0.000538	0.042
LIT_MM_WELLS_MACROPHAGE_RIKEN-CLONE_FANTOM_DIFF	TLR2	69.54	1.46	0.34	4.32	1.55e-05	0.00385
LIT_MM_SUSZTAK_STZ-TREATED_C57BL6-MICE_DIFF	AK4	108.54	1.48	0.14	10.23	1.5e-24	1.15e-20
LIT_MM_RIVOLTA_COCHLEAR_HAIR_DAY9_UP	SERPINB1A	180.65	1.5	0.44	3.44	0.00058	0.0447
LIT_MM_ANISIMOV_P19-EC-CELL_SAGE-CATALOGS_DIFF	RPL3	1736.88	1.5	0.41	3.69	0.000222	0.0242
LIT_MM_YAO_29M-BDF1-MICE_TESTIS_UP	TUBB6	1152.05	1.52	0.34	4.42	9.71e-06	0.00271
LIT_MM_IACOBAS_CX43-NULL-ASTROCYTES_MOST-VARIABLY_DIFF	SHROOM3	45.44	1.53	0.43	3.54	0.000401	0.0349
LIT_MM_SUSZTAK_STZ-TREATED_C57BL6-MICE_DIFF	DDC	10.02	1.53	0.45	3.39	0.000695	0.05
LIT_MM_YANG_LIVER-HOTSPOT-RS3699728_SEX_DIFF	MFSD7A	133.25	1.54	0.43	3.61	0.000311	0.0293
LIT_MM_SUSZTAK_MESANGIAL-MATRIX_VS_MINIMALMESANGIAL_DIFF	8430408G22RIK	211.64	1.55	0.39	3.96	7.38e-05	0.0117
LIT_MM_MAHERALI_2D4IPS-CELL_ES_MEF_DIFF	2810032G03RIK	14.03	1.56	0.42	3.69	0.000222	0.0242
LIT_MM_TURK_INBRED-STRAIN_DIFF	CYP46A1	14.25	1.56	0.45	3.49	0.000489	0.0394
LIT_MM_ZHANG_HEPATOCYTES_1H_FSK_UP	SIK1	686.9	1.62	0.39	4.17	3.11e-05	0.00627
LIT_MM_YAO_6HP4_KO_VS_SAM_UP	NCAM1	279.83	1.65	0.48	3.44	0.000583	0.0447
LIT_MM_EAVES_IDD3-5_VS_NOD_SPLEEN_UP	CCNA2	26.53	1.65	0.44	3.75	0.000178	0.0212
LIT_MM_FUKADA_QUIESCENT-SATELLITE-CELL_VS_SATELLITE-CELL_DN	CGREF1	54	1.67	0.44	3.78	0.000155	0.0198
LIT_MM_MITCHELL_RAS_HEART_UP	ZFP697	59.69	1.69	0.48	3.53	0.00042	0.0356
LIT_MM_DAUPHINOT_TS1CJE-MICE_VS_EUPLOIDS_VARAN_ANOVA_DIFF	ZAP70	19.92	1.73	0.45	3.81	0.000138	0.0184
LIT_MM_CHEN_FOXP3-SCURFY-MUTATION_DIABETES_DN	SEMA4F	12.06	1.74	0.51	3.39	0.00069	0.05
LIT_MM_SUSZTAK_DB-DB_VS_DB-M_DIFF	SNHG11	27.35	1.74	0.22	7.87	3.51e-15	1.8e-11
LIT_MM_MIJALSKI_16DUAL-COLOR_HYBRIDIZATIONS_KIDNEY_UP	MYL12A	9901.4	1.79	0.45	3.95	7.69e-05	0.0118
LIT_MM_YAO_14M-SAMPL-MICE_TESTIS_UP	TEKT1	151.48	1.81	0.45	4.03	5.59e-05	0.00954
LIT_MM_KOZUL_LUNG_100PPB-ARSENIC-DW_10PPB-ARSENIC-DW_IMMUNE_DIFF	GM12185	43.14	1.81	0.48	3.79	0.000151	0.0196
LIT_MM_SADATE-NGATCHOU_TESTOSTERONE_UP	AMPD3	535.84	1.81	0.38	4.81	1.5e-06	0.000721
LIT_MM_HOFFMANN_PRE-BI_VS_SMALL-PRE-BII-CELL_DIFF	RRM2	45.14	1.82	0.43	4.2	2.69e-05	0.00573
LIT_MM_MAJUMDER_RAPAMYCIN-INHIBITOR_DIFF	KCNK5	59.75	1.83	0.47	3.88	0.000103	0.0149
LIT_MM_HOFFMANN_IMMATURE_VS_MATURE-B-CELL_DIFF	CDK5R1	27.83	1.83	0.49	3.75	0.000175	0.0212
LIT_MM_SOKOLOVIC_FASTING_INTESTINE_12H_DN	A730090N16RIK	5.76	1.87	0.5	3.72	0.000202	0.0228
LIT_MM_HOFFMANN_PRE-BI_VS_SMALL-PRE-BII-CELL_DIFF	LGALS3	341.43	1.89	0.51	3.73	0.000188	0.0222
LIT_MM_HOUSE_EPIDIDYMAL-ADIPOSE_5D_14D_DIFF	TNFRSF23	304.13	1.92	0.44	4.42	9.99e-06	0.00274
LIT_MM_ZENG_MATERNAL_PREIMPLANTATION_DIFF	BC021891	15	1.96	0.35	5.63	1.76e-08	2.27e-05
LIT_MM_HOFFMANN_T-CELL_LYMPHOCYTE_C17_DIFF	CD72	9.89	2.06	0.58	3.57	0.000353	0.0321
LIT_MM_TOMCZAK_MYOGENIC_2D_C1_DIFF	GTSE1	7.33	2.08	0.57	3.67	0.000241	0.0254
LIT_MM_DIVINA_GERMINAL-CELL_DN	4933415F23RIK	41.37	2.09	0.44	4.75	2.04e-06	0.000924
LIT_MM_TSENG_16-W-MDX_GASTROCNEMIUS-MUSCLE_UP	CD52	62.23	2.1	0.59	3.55	0.00038	0.0337
LIT_MM_LEE_HUNTINGTIN_POLYGLUTAMINE-TRACT_STRIATAL-CELL_DN	RAP1GAP2	423.74	2.14	0.58	3.7	0.000214	0.0238
LIT_MM_PULIPPARACHARUVIL_MEF2_UP	DUPD1	3028.95	2.15	0.56	3.81	0.000137	0.0184
LIT_MM_DIVINA_TOTAL-TESTIS_PEM-1-2PEMTT_MAPPED_DIFF	ABHD15	49.91	2.21	0.56	3.96	7.45e-05	0.0117
LIT_MM_ZENG_MATERNAL_PREIMPLANTATION_DIFF	OTOS	3.56	2.23	0.65	3.42	0.000616	0.0462
LIT_MM_TOMCZAK_MYOGENIC_2D_C2_DIFF	FOXQ1	6.46	2.24	0.54	4.12	3.74e-05	0.00709
LIT_MM_MOYNIHAN_SIRT1-OVEREXPRESSING-BETA-CELL_DN	KLHDC8A	27.95	2.25	0.37	6.06	1.34e-09	3.43e-06
LIT_MM_HOFFMANN_T-CELL_LYMPHOCYTE_C6_DIFF	DTL	9.34	2.27	0.62	3.65	0.000258	0.0268
LIT_MM_HOFFMANN_T-CELL_LYMPHOCYTE_C16_DIFF	CCR7	8.17	2.29	0.62	3.72	0.000201	0.0228
LIT_MM_LANG_SOCS3_VS_MACROPHAGES_400TREATMENT_IL-6_UP	CCL8	83.71	2.31	0.65	3.55	0.000382	0.0337
LIT_MM_YANG_LIVER_MALE_LPL-HETEROZYGOUS-KO_DIFF	C730002L08RIK	5.25	2.36	0.61	3.85	0.000117	0.0164
LIT_MM_LEE_SUBCLASSA_A_VS_B_HUMAN-CANCER_DN	DNASE1L3	11.96	2.39	0.51	4.72	2.37e-06	0.00104
LIT_MM_MIJALSKI_16DUAL-COLOR_HYBRIDIZATIONS_LIVER_UP	ACOX2	10.11	2.41	0.57	4.24	2.21e-05	0.00508
LIT_MM_HOFFMANN_PRE-BI_VS_SMALL-PRE-BII-CELL_DIFF	TOP2A	40.68	2.41	0.67	3.62	0.000293	0.0285
LIT_MM_HOFFMANN_LARGE_VS_SMALL-PRE-BII-CELL_DIFF	MYOG	226.12	2.41	0.54	4.45	8.7e-06	0.00247
LIT_MM_EAVES_IDD3-5_VS_NOD_THYMUS_UP	SLC23A3	6.86	2.44	0.66	3.68	0.000237	0.0251
LIT_MM_BJORKBACKA_AORTAS-MYD88_APOE-MICE_DIFF	TREM2	52.11	2.51	0.71	3.54	0.000408	0.035
LIT_MM_SYMULA_CDK4_VS_ES-CELL-LINE_DIFF	UCHL1	280.27	2.55	0.61	4.22	2.49e-05	0.00551
LIT_MM_HOFFMANN_PRE-BI_VS_SMALL-PRE-BII-CELL_DIFF	E2F8	14.49	2.59	0.73	3.52	0.000434	0.0365
LIT_MM_HEWITT_2H_INJECTED-VEHICLE-ESTREN-19NT-E2_DIFF	GGT6	9.66	2.59	0.76	3.42	0.000627	0.0467
LIT_MM_TOMCZAK_MYOGENIC_2D_C3_DIFF	CHRNA1	1328.66	2.63	0.59	4.49	7.15e-06	0.00224
LIT_MM_HAMATANI_DORMANT_ACTIVATED-BLASTOCYST_DIFF	AIF1L	411.27	2.64	0.58	4.55	5.45e-06	0.00182
LIT_MM_HOFFMANN_PRE-BI_VS_LARGE-PRE-BII-CELL_DIFF	CCL5	15.61	2.69	0.67	3.99	6.73e-05	0.0109
LIT_MM_TOMCZAK_MYOGENIC_2D_C4_DIFF	CPNE2	1156.36	2.69	0.5	5.35	8.56e-08	7.31e-05
LIT_MM_RIVOLTA_COCHLEAR_HAIR_DAY4_UP	CDKN1A	1048.22	2.7	0.55	4.92	8.85e-07	0.000494
LIT_MM_TOMCZAK_MYOGENIC_2D_C1_DIFF	CKAP2	16.9	2.82	0.63	4.46	8.1e-06	0.00239
LIT_MM_TOMCZAK_MYOGENIC_2D_C2_DIFF	RUNX1	380.39	2.86	0.57	5.02	5.24e-07	0.000313
LIT_MM_RIVOLTA_COCHLEAR_HAIR_DAY9_DN	TIMP1	72.32	2.92	0.7	4.16	3.23e-05	0.00628
LIT_MM_RIVOLTA_COCHLEAR_HAIR_DAY2_UP	GADD45A	2333.35	2.93	0.68	4.32	1.58e-05	0.00385
LIT_MM_LANG_SOCS3_VS_MACROPHAGES_100TREATMENT_IL-6_UP	CXCL10	52.69	2.99	0.61	4.89	1e-06	0.000531
LIT_MM_MOYNIHAN_SIRT1-KNOCKDOWN-BETA-CELL_UP	GSDMA	10.16	3	0.81	3.72	0.000201	0.0228
LIT_MM_MATSUI_ALLOGRAFT_VS_ISOGRAFT_7D_UP	SERPINA3G	6.03	3.01	0.88	3.43	0.000606	0.0456
LIT_MM_REDDY_GLUCOCORTICOID_CIRCADIAN_LIVER_DIFF	MT3	98.09	3.02	0.68	4.45	8.66e-06	0.00247
LIT_MM_SHETH_PAM5_TUMOR_LIVER_TXNIP-DEFICIENT_DIFF	OPRD1	5.67	3.02	0.66	4.56	5.05e-06	0.00176
LIT_MM_BEGLOPOULOS_CEREBRAL-CORTEX_PRESENILIN_DN	ARHGDIG	49.72	3.08	0.66	4.66	3.12e-06	0.00126
LIT_MM_BARASH_48H_EC-BOUT_UP	ANKRD1	2916.52	3.1	0.68	4.58	4.6e-06	0.00165
LIT_MM_ESAU_LIVER_4W_ALINE_VS_MIR-122-ASO-2W_DN	FAM26F	7.75	3.21	0.88	3.66	0.000256	0.0268
LIT_MM_ROWLAND_MUTANT569_MUTANT391_GHR_DN	ORM1	22.53	3.32	0.77	4.3	1.68e-05	0.00397
LIT_MM_SCHAEFER_DRD1-CRE_DRD1-BACTRAP_G9AFL_FL_STRIATUM_UP	GM2694	4.39	3.35	0.82	4.07	4.61e-05	0.00833
LIT_MM_RIVOLTA_COCHLEAR_HAIR_DAY4_DN	SPP1	170.37	3.37	0.59	5.74	9.42e-09	1.61e-05
LIT_MM_TOMCZAK_MYOGENIC_2D_C3_DIFF	HSF2BP	23.55	3.38	0.62	5.41	6.33e-08	6.24e-05
LIT_MM_TOMCZAK_MYOGENIC_2D_C3_DIFF	GDF5	62.38	3.38	0.63	5.4	6.5e-08	6.24e-05
LIT_MM_ZENG_1-CELL-TRANSIENT_PREIMPLANTATION_DIFF	ERC2	36.06	3.41	0.31	10.99	4.49e-28	6.9e-24
LIT_MM_FERTUCK_APOPTOTIC_OTHER-SIGNALING-RESPONSE_DIFF	GAL	7.61	3.47	1	3.47	0.000525	0.0418
LIT_MM_SHAROVA_CORRELATED-NEGATIVELY-PC1_DIFF	2410137F16RIK	230.62	3.65	0.6	6.09	1.12e-09	3.43e-06
LIT_MM_FREY_KIDNEY_PEPT2-DEFICIENT_20K-CDNA_DN	CES2C	35.4	3.73	0.78	4.78	1.72e-06	0.000801
LIT_MM_NISHIYAMA_TF-ELF1_ES-CELL_UP	E130218I03RIK	3.45	3.74	1.03	3.63	0.000282	0.028
LIT_MM_PORTER_MEOM_MLM-MYOBLAST_DIFF	SLN	516	3.82	0.93	4.13	3.65e-05	0.00701
LIT_MM_DIVINA_TOTAL-TESTIS_PEM-1-2PEMTT_MAPPED_DIFF	ANKRD55	12.57	4.08	0.91	4.49	7.09e-06	0.00224
LIT_MM_TOMCZAK_MYOGENIC_2D_C3_DIFF	RRAD	884.89	4.09	0.72	5.72	1.07e-08	1.64e-05
LIT_MM_MACKIEWICZ_C2_CEREBRAL-CORTEX_SLEEP_UP	TMEM151A	3.75	4.33	1.23	3.53	0.000418	0.0356
LIT_MM_LU_ESTROGEN-PROGESTERONE_VS_VEHICLE-TREATMENT_DIFF	CACNG4	7.46	4.43	1.18	3.76	0.000167	0.0206
LIT_MM_DIVINA_TOTAL-TESTIS_PEM-1-2PEMTT_MAPPED_DIFF	ATP13A4	4.84	4.71	1.31	3.59	0.000331	0.0308
LIT_MM_CROKER_SOCS3-ALB_LIVER_IL-6_UP	SAA3	3.73	4.77	1.38	3.46	0.000538	0.042
LIT_MM_TOMCZAK_MYOGENIC_2D_C3_DIFF	CHRNG	109.5	5.09	1.1	4.63	3.69e-06	0.00138
LIT_MM_SYMULA_ABCAA1_VS_ES-CELL-LINE_DIFF	KRT18	527.29	5.27	1.05	5.02	5.29e-07	0.000313
LIT_MM_LECLERC_APCMIN_VS_TUMOR_DIFF	BPIFB1	18.93	5.55	1.33	4.16	3.14e-05	0.00627
LIT_MM_KWONG_MIP-1ALPHA_3D_POSTOLFACTORY_BULBECTOMY_UP	ORM2	10	6.2	1.76	3.51	0.000447	0.0369
LIT_MM_TURK_INBRED-STRAIN_DIFF	CNTN2	72.11	6.53	1.26	5.18	2.19e-07	0.00016

## Sheet: eTableS7 GOrilla 6m vs. 24m
FDR q-value < 0.10
GO Term		P-value	FDR q-value	Enrichment	Genes	gene_id
GO:0001602		5.86e-05	0.027	43.19	[Npy4r - neuropeptide y receptor y4, Npy5r - neuropeptide y receptor y5, Npy6r - neuropeptide y receptor y6]	['Npy4r', 'Npy5r', 'Npy6r']
GO:0001601		0.000156	0.0448	34.55	[Npy4r - neuropeptide y receptor y4, Npy5r - neuropeptide y receptor y5, Npy6r - neuropeptide y receptor y6]	['Npy4r', 'Npy5r', 'Npy6r']
GO:0004983		8.01e-07	0.000615	19.81	[Npy4r - neuropeptide y receptor y4, Prokr1 - prokineticin receptor 1, Npy5r - neuropeptide y receptor y5, Prlhr - prolactin releasing hormone receptor, Npy6r - neuropeptide y receptor y6, Prokr2 - prokineticin receptor 2]	['Npy4r', 'Prokr1', 'Npy5r', 'Prlhr', 'Npy6r', 'Prokr2']
GO:0098634		0.000229	0.0554	8.88	[Itga2 - integrin alpha 2, Madcam1 - mucosal vascular addressin cell adhesion molecule 1, Itga10 - integrin, alpha 10, Itga1 - integrin alpha 1, Itga11 - integrin alpha 11]	['Itga2', 'Madcam1', 'Itga10', 'Itga1', 'Itga11']
GO:0008188		2.36e-06	0.00155	8.25	[Npy4r - neuropeptide y receptor y4, Gpr37 - g protein-coupled receptor 37, Sstr5 - somatostatin receptor 5, Prokr1 - prokineticin receptor 1, Mrgpra4 - mas-related gpr, member a4, Prlhr - prolactin releasing hormone receptor, Npy5r - neuropeptide y receptor y5, Npy6r - neuropeptide y receptor y6, Sstr1 - somatostatin receptor 1, Prokr2 - prokineticin receptor 2]	['Npy4r', 'Gpr37', 'Sstr5', 'Prokr1', 'Mrgpra4', 'Prlhr', 'Npy5r', 'Npy6r', 'Sstr1', 'Prokr2']
GO:0008528		1.28e-08	5.89e-05	3.65	[Sstr5 - somatostatin receptor 5, Cysltr2 - cysteinyl leukotriene receptor 2, Agtr2 - angiotensin ii receptor, type 2, Agtr1b - angiotensin ii receptor, type 1b, Cxcr1 - chemokine (c-x-c motif) receptor 1, Mrgprh - mas-related gpr, member h, Cckar - cholecystokinin a receptor, Fpr3 - formyl peptide receptor 3, Gpr37 - g protein-coupled receptor 37, Prokr1 - prokineticin receptor 1, Aplnr - apelin…	['Sstr5', 'Cysltr2', 'Agtr2', 'Agtr1b', 'Cxcr1', 'Mrgprh', 'Cckar', 'Fpr3', 'Gpr37', 'Prokr1', 'Aplnr', 'Oxtr', 'Gcgr', 'Ackr4', 'Rxfp2', 'Gpr182', 'Npy4r', 'Npy5r', 'Prlhr', 'Npy6r', 'Dear1', 'Mrgpra4', 'Calcr', 'Cxcr2', 'F2rl3', 'Sstr1', 'Sstr4', 'Prokr2']
GO:0001653		3.47e-08	7.98e-05	3.48	[Sstr5 - somatostatin receptor 5, Cysltr2 - cysteinyl leukotriene receptor 2, Agtr2 - angiotensin ii receptor, type 2, Agtr1b - angiotensin ii receptor, type 1b, Cxcr1 - chemokine (c-x-c motif) receptor 1, Mrgprh - mas-related gpr, member h, Cckar - cholecystokinin a receptor, Fpr3 - formyl peptide receptor 3, Gpr37 - g protein-coupled receptor 37, Prokr1 - prokineticin receptor 1, Aplnr - apelin…	['Sstr5', 'Cysltr2', 'Agtr2', 'Agtr1b', 'Cxcr1', 'Mrgprh', 'Cckar', 'Fpr3', 'Gpr37', 'Prokr1', 'Aplnr', 'Oxtr', 'Gcgr', 'Ackr4', 'Rxfp2', 'Gpr182', 'Npy4r', 'Npy5r', 'Prlhr', 'Npy6r', 'Dear1', 'Mrgpra4', 'Calcr', 'Cxcr2', 'F2rl3', 'Sstr1', 'Sstr4', 'Prokr2']
GO:0004930		4.24e-07	0.00065	2.26	[Hrh4 - histamine receptor h4, Trhr - thyrotropin releasing hormone receptor, Slc22a22 - solute carrier family 22 (organic cation transporter), member 22, Agtr2 - angiotensin ii receptor, type 2, Vmn2r54 - vomeronasal 2, receptor 54, Drd2 - dopamine receptor d2, P2ry1 - purinergic receptor p2y, g-protein coupled 1, Olfr140 - olfactory receptor 140, Gpr37 - g protein-coupled receptor 37, Fpr3 - fo…	['Hrh4', 'Trhr', 'Slc22a22', 'Agtr2', 'Vmn2r54', 'Drd2', 'P2ry1', 'Olfr140', 'Gpr37', 'Fpr3', 'Tas2r126', 'Prokr1', 'Vmn1r5', 'Gpr50', 'Aplnr', 'Vmn1r32', 'Gcgr', 'Olfr1537', 'Vmn1r213', 'Vmn2r97', 'Olfr55', 'Npy5r', 'Npy6r', 'Olfr1020', 'Mrgprf', 'Ghsr', 'Htr4', 'Calcr', 'Olfr9', 'Vmn1r53', 'Vmn2r56', 'Sstr5', 'Taar2', 'Cxcr1', 'Cckar', 'Vmn2r7', 'Gpr135', 'Rxfp2', 'Vmn1r203', 'Npy4r', 'Mrgprx2'…
GO:0022804		0.000151	0.0463	1.69	[Slc38a2 - solute carrier family 38, member 2, Slc5a4a - solute carrier family 5, member 4a, Abcg8 - atp-binding cassette, sub-family g (white), member 8, Abca14 - atp-binding cassette, sub-family a (abc1), member 14, Abca2 - atp-binding cassette, sub-family a (abc1), member 2, Slc22a5 - solute carrier family 22 (organic cation transporter), member 5, Slc16a14 - solute carrier family 16 (monocarb…	['Slc38a2', 'Slc5a4a', 'Abcg8', 'Abca14', 'Abca2', 'Slc22a5', 'Slc16a14', 'Slc22a3', 'Slc22a1', 'Slc1a6', 'Atp2b4', 'Slc22a8', 'Slc26a3', 'Slc26a5', 'Slc4a11', 'Slc41a1', 'AI317395', 'Slc24a5', 'Cpox', 'Abcb4', 'Atp6v0a2', 'Abcc4', 'Slc2a4', 'Atp6v1e2', 'Slc36a3', 'Slc26a4', 'Abcd1', 'Slc5a12', 'Slc6a5', 'Slc16a3', 'Slc17a7', 'Slc16a10', 'Atp2b3', 'Slc35e1', 'Slc8a2', 'Slco6c1', 'Atp2a1', 'Slco2a…
GO:0046873		0.000166	0.045	1.65	[Slc38a2 - solute carrier family 38, member 2, Slc5a4a - solute carrier family 5, member 4a, Tmc2 - transmembrane channel-like gene family 2, Slc22a3 - solute carrier family 22 (organic cation transporter), member 3, Tfrc - transferrin receptor, Slc22a1 - solute carrier family 22 (organic cation transporter), member 1, Kcnc2 - potassium voltage gated channel, shaw-related subfamily, member 2, Slc…	['Slc38a2', 'Slc5a4a', 'Tmc2', 'Slc22a3', 'Tfrc', 'Slc22a1', 'Kcnc2', 'Slc1a6', 'Kcnj1', 'Atp2b4', 'Slc41a1', 'Slc4a11', 'Kcnv2', 'Pkd2l1', 'Slc24a5', 'Kcna7', 'Pkd1', 'Trpm1', 'Cpox', 'Kcnn1', 'Trpm5', 'Lrrc55', 'Slc39a5', 'Slc6a5', 'Cacna1b', 'Slc17a7', 'Slc30a2', 'Kcnk18', 'Nipal3', 'Cacna2d4', 'Cacna1f', 'Cachd1', 'Atp2b3', 'Kcnk15', 'Kcnq2', 'Kcnn2', 'Slc8a2', 'Atp2a1', 'Trpm6', 'Atp1b2', 'H…
GO:0004888		9.3e-06	0.00535	1.61	[Hrh4 - histamine receptor h4, Olfr803 - olfactory receptor 803, Drd2 - dopamine receptor d2, Olfr1366 - olfactory receptor 1366, Olfr140 - olfactory receptor 140, Tas2r126 - taste receptor, type 2, member 126, Pkd2l1 - polycystic kidney disease 2-like 1, Aplnr - apelin receptor, Ms4a2 - membrane-spanning 4-domains, subfamily a, member 2, Olfr572 - olfactory receptor 572, Gcgr - glucagon receptor…	['Hrh4', 'Olfr803', 'Drd2', 'Olfr1366', 'Olfr140', 'Tas2r126', 'Pkd2l1', 'Aplnr', 'Ms4a2', 'Olfr572', 'Gcgr', 'Olfr1382', 'Olfr1340', 'Olfr857', 'Olfr1537', 'Chrna6', 'Dcc', 'Vmn2r97', 'Olfr27', 'Olfr55', 'Npy5r', 'Npy6r', 'Pigr', 'Olfr1020', 'Mrgprf', 'Olfr456', 'Ghsr', 'Htr4', 'Calcr', 'Chrna2', 'Olfr1395', 'Olfr557', 'Vmn2r56', 'Taar2', 'Olfr770', 'Cxcr1', 'Cckar', 'Vmn2r7', 'Gabrg1', 'Il22ra2…
GO:0000981		0.000109	0.0417	1.57	[Sox21 - sry-box containing gene 21, Atf7 - activating transcription factor 7, Ppard - peroxisome proliferator activator receptor delta, Ar - androgen receptor, Hic1 - hypermethylated in cancer 1, Aire - autoimmune regulator (autoimmune polyendocrinopathy candidiasis ectodermal dystrophy), Nr2e3 - nuclear receptor subfamily 2, group e, member 3, Hmbox1 - homeobox containing 1, Rora - rar-related …	['Sox21', 'Atf7', 'Ppard', 'Ar', 'Hic1', 'Aire', 'Nr2e3', 'Hmbox1', 'Rora', 'Hdx', 'Foxk2', 'Pou5f1', 'Elf5', 'Nk', 'Sp7', 'Tbx19', 'Lhx6', 'Foxo4', 'Mypop', 'E2f6', 'Tcf23', 'Zfp750', 'Gbx2', 'Sox1', 'Klf12', 'Arx', 'Six4', 'Prdm5', 'Six3', 'Sox18', 'Mafa', 'Six2', 'Tlx2', 'Sox6', 'Zbtb16', 'Tead1', 'Sox8', 'Sox7', 'Hand2', 'Gata1', 'Zfpm1', 'Foxa2', 'Npas1', 'Foxa3', 'Stat5b', 'Bcl6', 'Irf5', '…
GO:0038023		5.57e-05	0.0285	1.53	[Hrh4 - histamine receptor h4, Olfr803 - olfactory receptor 803, Drd2 - dopamine receptor d2, Olfr1366 - olfactory receptor 1366, Olfr140 - olfactory receptor 140, Pkd2l1 - polycystic kidney disease 2-like 1, Tas2r126 - taste receptor, type 2, member 126, Aplnr - apelin receptor, Ms4a2 - membrane-spanning 4-domains, subfamily a, member 2, Olfr572 - olfactory receptor 572, Gcgr - glucagon receptor…	['Hrh4', 'Olfr803', 'Drd2', 'Olfr1366', 'Olfr140', 'Pkd2l1', 'Tas2r126', 'Aplnr', 'Ms4a2', 'Olfr572', 'Gcgr', 'Olfr1382', 'Olfr1340', 'Olfr857', 'Olfr1537', 'Chrna6', 'Dcc', 'Vmn2r97', 'Npy5r', 'Olfr27', 'Olfr55', 'Npy6r', 'Pigr', 'Olfr1020', 'Mrgprf', 'Olfr456', 'Ghsr', 'Htr4', 'Calcr', 'Chrna2', 'Olfr1395', 'Olfr557', 'Vmn2r56', 'Taar2', 'Olfr770', 'Cxcr1', 'Cckar', 'Vmn2r7', 'Gabrg1', 'Il22ra2…
GO:0022857		5e-07	0.000575	1.51	[Slc2a2 - solute carrier family 2 (facilitated glucose transporter), member 2, Slc38a2 - solute carrier family 38, member 2, Tmc2 - transmembrane channel-like gene family 2, Abcg8 - atp-binding cassette, sub-family g (white), member 8, Abca2 - atp-binding cassette, sub-family a (abc1), member 2, Slc22a5 - solute carrier family 22 (organic cation transporter), member 5, Slc22a3 - solute carrier fa…	['Slc2a2', 'Slc38a2', 'Tmc2', 'Abcg8', 'Abca2', 'Slc22a5', 'Slc22a3', 'Slc22a2', 'Gje1', 'Slc22a1', 'Gjd4', 'Kcnj1', 'Slc1a6', 'Atp2b4', 'Slc26a5', 'Slc26a3', 'Slc22a8', 'Slc4a11', 'Slc41a1', 'Pkd2l1', 'Slc24a5', 'Aqp4', 'Pkd1', 'Clcn1', 'Ceacam1', 'Abcb4', 'Ucp1', 'Abcc4', 'Slc2a4', 'Aqp7', 'Atp6v1e2', 'Chrna6', 'Lrrc55', 'Trpm5', 'Slc39a5', 'G630090E17Rik', 'Slc5a12', 'Slc6a5', 'Cacna1b', 'Slc1…
GO:0060089		0.000123	0.0406	1.5	[Hrh4 - histamine receptor h4, Olfr803 - olfactory receptor 803, Drd2 - dopamine receptor d2, Olfr1366 - olfactory receptor 1366, Olfr140 - olfactory receptor 140, Pkd2l1 - polycystic kidney disease 2-like 1, Tas2r126 - taste receptor, type 2, member 126, Aplnr - apelin receptor, Ms4a2 - membrane-spanning 4-domains, subfamily a, member 2, Olfr572 - olfactory receptor 572, Gcgr - glucagon receptor…	['Hrh4', 'Olfr803', 'Drd2', 'Olfr1366', 'Olfr140', 'Pkd2l1', 'Tas2r126', 'Aplnr', 'Ms4a2', 'Olfr572', 'Gcgr', 'Olfr1382', 'Olfr1340', 'Olfr857', 'Olfr1537', 'Chrna6', 'Dcc', 'Vmn2r97', 'Npy5r', 'Olfr27', 'Olfr55', 'Npy6r', 'Pigr', 'Olfr1020', 'Mrgprf', 'Olfr456', 'Ghsr', 'Htr4', 'Calcr', 'Chrna2', 'Olfr1395', 'Olfr557', 'Vmn2r56', 'Taar2', 'Olfr770', 'Cxcr1', 'Cckar', 'Vmn2r7', 'Gabrg1', 'Il22ra2…
GO:0005215		5.02e-07	0.000462	1.49	[Slc2a2 - solute carrier family 2 (facilitated glucose transporter), member 2, Slc38a2 - solute carrier family 38, member 2, Tmc2 - transmembrane channel-like gene family 2, Abcg8 - atp-binding cassette, sub-family g (white), member 8, Spns2 - spinster homolog 2, Abca2 - atp-binding cassette, sub-family a (abc1), member 2, Slc22a5 - solute carrier family 22 (organic cation transporter), member 5,…	['Slc2a2', 'Slc38a2', 'Tmc2', 'Abcg8', 'Spns2', 'Abca2', 'Slc22a5', 'Slc22a3', 'Slc22a2', 'Gje1', 'Slc22a1', 'Gjd4', 'Kcnj1', 'Slc1a6', 'Atp2b4', 'Slc26a5', 'Slc26a3', 'Slc22a8', 'Slc4a11', 'Slc41a1', 'Pkd2l1', 'Slc24a5', 'Aqp4', 'Pkd1', 'Ceacam1', 'Clcn1', 'Abcb4', 'Ucp1', 'Abcc4', 'Ttpa', 'Slc2a4', 'Aqp7', 'Atp6v1e2', 'Chrna6', 'Lrrc55', 'Trpm5', 'Slc39a5', 'G630090E17Rik', 'Slc5a12', 'Slc6a5',…
GO:0015318		9.09e-05	0.038	1.46	[Slc38a2 - solute carrier family 38, member 2, Tmc2 - transmembrane channel-like gene family 2, Slc22a3 - solute carrier family 22 (organic cation transporter), member 3, Slc22a1 - solute carrier family 22 (organic cation transporter), member 1, Kcnj1 - potassium inwardly-rectifying channel, subfamily j, member 1, Slc1a6 - solute carrier family 1 (high affinity aspartate/glutamate transporter), m…	['Slc38a2', 'Tmc2', 'Slc22a3', 'Slc22a1', 'Kcnj1', 'Slc1a6', 'Atp2b4', 'Slc22a8', 'Slc26a5', 'Slc26a3', 'Slc41a1', 'Slc4a11', 'Pkd2l1', 'Slc24a5', 'Aqp4', 'Pkd1', 'Ceacam1', 'Clcn1', 'Abcc4', 'Aqp7', 'Slc2a4', 'Atp6v1e2', 'Chrna6', 'Lrrc55', 'Trpm5', 'Slc39a5', 'Slc5a12', 'Slc6a5', 'Cacna1b', 'Slc16a3', 'Slc17a7', 'Kcnk18', 'Nipal3', 'Slc16a10', 'Clic3', 'Cacna1f', 'Cachd1', 'Chrna2', 'Kcnk15', '…
GO:0015075		0.00012	0.0426	1.44	[Slc2a2 - solute carrier family 2 (facilitated glucose transporter), member 2, Slc38a2 - solute carrier family 38, member 2, Tmc2 - transmembrane channel-like gene family 2, Slc22a5 - solute carrier family 22 (organic cation transporter), member 5, Slc22a3 - solute carrier family 22 (organic cation transporter), member 3, Slc22a2 - solute carrier family 22 (organic cation transporter), member 2, …	['Slc2a2', 'Slc38a2', 'Tmc2', 'Slc22a5', 'Slc22a3', 'Slc22a2', 'Slc22a1', 'Kcnj1', 'Slc1a6', 'Atp2b4', 'Slc22a8', 'Slc26a3', 'Slc26a5', 'Slc41a1', 'Slc4a11', 'Pkd2l1', 'Slc24a5', 'Pkd1', 'Ceacam1', 'Clcn1', 'Abcc4', 'Slc2a4', 'Atp6v1e2', 'Chrna6', 'Lrrc55', 'Trpm5', 'Slc39a5', 'Slc5a12', 'Slc6a5', 'Cacna1b', 'Slc16a3', 'Slc17a7', 'Kcnk18', 'Nipal3', 'Slc16a10', 'Clic3', 'Cacna1f', 'Cachd1', 'Chrn…
GO:0003700		0.000203	0.052	1.39	[Sox21 - sry-box containing gene 21, Ar - androgen receptor, Hoxb2 - homeobox b2, Foxh1 - forkhead box h1, Ikzf4 - ikaros family zinc finger 4, Pitx3 - paired-like homeodomain transcription factor 3, Zfp957 - zinc finger protein 957, Hmbox1 - homeobox containing 1, Rora - rar-related orphan receptor alpha, Zic1 - zinc finger protein of the cerebellum 1, Esrra - estrogen related receptor, alpha, S…	['Sox21', 'Ar', 'Hoxb2', 'Foxh1', 'Ikzf4', 'Pitx3', 'Zfp957', 'Hmbox1', 'Rora', 'Zic1', 'Esrra', 'Spen', 'Foxo4', 'E2f6', 'Tcf23', 'Zfp750', 'Tfdp2', 'Gbx2', 'Zfp57', 'Klf12', 'Arx', 'Six4', 'Prdm5', 'Six3', 'Zfp41', 'Six2', 'Tead1', 'Hand2', 'Gata1', 'Zfpm1', 'Zfp131', 'Ctcfl', 'Npas2', 'Npas1', 'Stat5b', 'Maz', 'Arntl', 'Nk', 'Zbtb7b', 'Cbfa2t3', 'Zfp146', 'Tcf7l1', 'Tcf20', 'Dlx5', 'Nr4a3', 'Z…
FDR q-value > 0.10
GO Term		P-value	FDR q-value	Enrichment	Genes	gene_id
GO:0004339		0.00082	0.145	1219.47	[Mgam - maltase-glucoamylase]	['Mgam']
GO:0004918		0.000846	0.144	46.17	[Cxcr2 - chemokine (c-x-c motif) receptor 2, Cxcr1 - chemokine (c-x-c motif) receptor 1]	['Cxcr2', 'Cxcr1']
GO:0098639		0.000551	0.121	9.94	[Itga2 - integrin alpha 2, Itga10 - integrin, alpha 10, Itga1 - integrin alpha 1, Itga11 - integrin alpha 11]	['Itga2', 'Itga10', 'Itga1', 'Itga11']
GO:0005104		0.000469	0.108	6.47	[Flrt1 - fibronectin leucine rich transmembrane protein 1, Fgf6 - fibroblast growth factor 6, Klb - klotho beta, Kl - klotho, Fgf23 - fibroblast growth factor 23, Fgf17 - fibroblast growth factor 17, Fgf20 - fibroblast growth factor 20]	['Flrt1', 'Fgf6', 'Klb', 'Kl', 'Fgf23', 'Fgf17', 'Fgf20']
GO:0042813		0.000686	0.137	5.32	[Pkd1 - polycystic kidney disease 1 homolog, Fzd8 - frizzled homolog 8 (drosophila), Fzd7 - frizzled homolog 7 (drosophila), Ror1 - receptor tyrosine kinase-like orphan receptor 1, Lrp6 - low density lipoprotein receptor-related protein 6, Lrp5 - low density lipoprotein receptor-related protein 5, Fzd4 - frizzled homolog 4 (drosophila)]	['Pkd1', 'Fzd8', 'Fzd7', 'Ror1', 'Lrp6', 'Lrp5', 'Fzd4']
GO:0015293		0.000906	0.139	2.32	[Slc6a14 - solute carrier family 6 (neurotransmitter transporter), member 14, Slc5a4a - solute carrier family 5, member 4a, Slc15a5 - solute carrier family 15, member 5, Slc16a14 - solute carrier family 16 (monocarboxylic acid transporters), member 14, Slc22a3 - solute carrier family 22 (organic cation transporter), member 3, Slc5a12 - solute carrier family 5 (sodium/glucose cotransporter), membe…	['Slc6a14', 'Slc5a4a', 'Slc15a5', 'Slc16a14', 'Slc22a3', 'Slc5a12', 'Slc6a5', 'Slc1a6', 'Gm14085', 'Slc16a3', 'Slc17a7', 'Slc6a18', 'AI317395', 'Slc24a5', 'Slc6a20b', 'Slc18a2', 'Slc15a1', 'Slc38a4', 'Slc6a1', 'Slc38a3', 'Slc2a4']
GO:0046943		0.00086	0.136	1.93	[Slc38a2 - solute carrier family 38, member 2, Slco2a1 - solute carrier organic anion transporter family, member 2a1, Slc25a30 - solute carrier family 25, member 30, Slc17a3 - solute carrier family 17 (sodium phosphate), member 3, Slc16a14 - solute carrier family 16 (monocarboxylic acid transporters), member 14, Slc7a12 - solute carrier family 7 (cationic amino acid transporter, y+ system), membe…	['Slc38a2', 'Slco2a1', 'Slc25a30', 'Slc17a3', 'Slc16a14', 'Slc7a12', 'Slc1a6', 'Slc27a5', 'Slc26a3', 'Slc26a5', 'Ceacam1', 'Sfxn3', 'Abcc4', 'Slc17a4', 'Slc36a3', 'Slc7a2', 'Slc26a4', 'Slc51b', 'Slc38a5', 'Slc6a5', 'Slc5a12', 'Slc16a3', 'Slc26a6', 'Slc17a7', 'Slc6a18', 'Slc6a20b', 'Slc16a10', 'Slc38a8', 'Slc38a4', 'Slc6a1', 'Slc38a3']
GO:0005342		0.00086	0.141	1.93	[Slc38a2 - solute carrier family 38, member 2, Slco2a1 - solute carrier organic anion transporter family, member 2a1, Slc25a30 - solute carrier family 25, member 30, Slc17a3 - solute carrier family 17 (sodium phosphate), member 3, Slc16a14 - solute carrier family 16 (monocarboxylic acid transporters), member 14, Slc7a12 - solute carrier family 7 (cationic amino acid transporter, y+ system), membe…	['Slc38a2', 'Slco2a1', 'Slc25a30', 'Slc17a3', 'Slc16a14', 'Slc7a12', 'Slc1a6', 'Slc27a5', 'Slc26a5', 'Slc26a3', 'Ceacam1', 'Sfxn3', 'Abcc4', 'Slc17a4', 'Slc36a3', 'Slc7a2', 'Slc26a4', 'Slc51b', 'Slc38a5', 'Slc6a5', 'Slc5a12', 'Slc16a3', 'Slc26a6', 'Slc17a7', 'Slc6a18', 'Slc6a20b', 'Slc16a10', 'Slc38a8', 'Slc38a4', 'Slc6a1', 'Slc38a3']
GO:0015291		0.000648	0.136	1.78	[Slc35e1 - solute carrier family 35, member e1, Slc38a2 - solute carrier family 38, member 2, Slc5a4a - solute carrier family 5, member 4a, Slc8a2 - solute carrier family 8 (sodium/calcium exchanger), member 2, Slco6c1 - solute carrier organic anion transporter family, member 6c1, Slco2a1 - solute carrier organic anion transporter family, member 2a1, Slc25a30 - solute carrier family 25, member 30…	['Slc35e1', 'Slc38a2', 'Slc5a4a', 'Slc8a2', 'Slco6c1', 'Slco2a1', 'Slc25a30', 'Slc22a5', 'Slc16a14', 'Slc22a3', 'Slc22a1', 'Slc1a6', 'Ank', 'Slc26a3', 'Slc22a8', 'Slc26a5', 'Slc22a4', 'Slc41a1', 'Slc4a11', 'AI317395', 'Slc24a5', 'Slc15a1', 'Slc9a2', 'Slc2a4', 'Slc6a14', 'Slc17a4', 'Slc15a5', 'Slc36a3', 'Slc26a4', 'Slc6a5', 'Slc5a12', 'Gm14085', 'Slc16a3', 'Slc17a7', 'Slc26a6', 'Slc6a18', 'Slc16a1…
GO:0008324		0.000788	0.145	1.46	[Slc38a2 - solute carrier family 38, member 2, Slc5a4a - solute carrier family 5, member 4a, Tmc2 - transmembrane channel-like gene family 2, Slc22a5 - solute carrier family 22 (organic cation transporter), member 5, Slc22a3 - solute carrier family 22 (organic cation transporter), member 3, Tfrc - transferrin receptor, Slc22a2 - solute carrier family 22 (organic cation transporter), member 2, Slc…	['Slc38a2', 'Slc5a4a', 'Tmc2', 'Slc22a5', 'Slc22a3', 'Tfrc', 'Slc22a2', 'Slc22a1', 'Kcnc2', 'Kcnj1', 'Slc1a6', 'Atp2b4', 'Slc22a8', 'Gria1', 'Slc4a11', 'Slc41a1', 'Kcnv2', 'Pkd2l1', 'Slc24a5', 'Kcna7', 'Pkd1', 'Trpm1', 'Cpox', 'Kcnn1', 'Sfxn3', 'Atp6v0a2', 'Slc2a4', 'Atp6v1e2', 'Slc36a3', 'Chrna6', 'Lrrc55', 'Trpm5', 'Slc39a5', 'Slc38a5', 'Slc6a5', 'Cacna1b', 'Slc17a7', 'Slc30a2', 'Nipal3', 'Kcnk…
GO:0005102		0.000764	0.146	1.3	[Camk2a - calcium/calmodulin-dependent protein kinase ii alpha, Sned1 - sushi, nidogen and egf-like domains 1, Tnn - tenascin n, Vtcn1 - v-set domain containing t cell activation inhibitor 1, Capn3 - calpain 3, Ace - angiotensin i converting enzyme (peptidyl-dipeptidase a) 1, Pten - phosphatase and tensin homolog, Ccdc129 - coiled-coil domain containing 129, Traf3ip2 - traf3 interacting protein 2…	['Camk2a', 'Sned1', 'Tnn', 'Vtcn1', 'Capn3', 'Ace', 'Pten', 'Ccdc129', 'Traf3ip2', 'Acvr1c', 'Zp3', 'Nts', 'Cdc42ep2', 'Flrt1', 'Il17f', 'Nov', 'Stat5b', 'Dner', 'Itga2', 'Hcrt', 'Nr4a3', 'Adh7', 'Srms', 'Grem2', 'Ly6g6e', 'Fgg', 'Tacc2', 'Irs1', 'Ep300', 'Spred2', 'Nr1h4', 'Madcam1', 'Adrb3', 'Smad3', 'S100a9', 'Cdnf', 'Ptpn11', 'Cav2', 'C1ql1', 'Rxra', 'Pdgfd', 'Fam19a4', 'Nf2', 'Lgr4', 'Il1r1'…
eTable S7 GOrilla Results from 6 to 24 months of age.
KEY: GO term = gene ontology term, FDR q-value = false discovery rate adjusted for multiple comparisons, enrichment = degree of change in GO term.
Data from GOrilla as explained in the main text.

## Sheet: eTableS8 Intersection 6m vs. 28
gene_id	log2 Fold Change	padj		eTable S8 GSEA and GOrilla Interactions Results from 6 to 28 months of age.
NPC1	-1.17124	0.000255696		KEY: padj = pvalue adjusted for multiple comparisons, ranked by padj (multiple comparison adjusted pvalue)
BTBD8	-1.80452	0.000173319		Data from GOrilla and GSEA intersected as explained in the main text.
PIK3AP1	-1.24777	0.00666468
AKAP5	-1.00331	0.00540857
GCK	-1.04843	8.30156e-05
HUWE1	-1.03379	0.000465616
PPP1R12B	-1.57532	0.00762544
PAX9	-1.79054	0.0346663
COL5A1	-1.42854	6.24863e-05
SLC24A5	-1.28932	0.0220461
GNA12	-1.22157	7.59499e-05
HEATR5B	-1.00045	7.04805e-05
E330009J07RIK	-1.23701	0.0220461
FGD3	-1.02395	0.0211459
ADAMTS3	-1.29654	3.89592e-05
EPHA3	-2.3848	2.14842e-07
DAGLA	-1.55593	1.38446e-13
ARHGEF11	-1.20001	0.00449638
RYBP	-1.00401	0.00390481
FCER2A	-1.71527	0.00218676
CAR12	-1.6345	0.011577
NAALAD2	-1.07916	3.94133e-07
UPRT	-1.24972	0.0337028
CACNG7	-1.15488	0.00146037
SPON2	-1.14087	0.0316084
AGBL1	-1.14212	0.0482321
ADRA1A	-1.3291	8.89349e-06
CACNA1C	-1.29007	3.37513e-05
FOXO3	-1.24028	0.044153
TTLL7	-1.21265	0.00106196
PTAFR	-1.1053	0.00342157
NOS1	-2.41179	0.000887102
SLC25A30	-1.63179	7.30004e-05
FN1	-1.29812	0.00184189
ANTXR1	-1.08588	0.000199077
SLC6A2	-1.37206	0.000297953
ITGA11	-1.56496	1.71125e-12
GRLF1	-1.13656	4.13151e-05
NWD1	-1.01952	0.00610023
COL5A2	-1.08155	0.0122766
CACNA1G	-1.07049	1.07669e-06
BCL9	-1.05746	0.00155623
TTLL4	-1.41399	8.98078e-05
DUOX2	-2.43897	0.0349965
NEBL	-1.7474	0.0156575
SIK2	-1.53686	0.0097786
MME	-1.46113	3.45343e-10
ETOHI1	-1.16268	0.00112209
PTCH1	-1.43155	0.0208546
ZBTB37	-1.06873	0.00780443
SCD2	-1.03416	6.82586e-07
SPNS2	-1.0685	0.000184742
AFF2	-1.64092	0.0230117
HR	-1.25754	2.15652e-07
MMP9	-1.23324	0.0103434
CRYBG3	-1.13134	2.54433e-05
EPHB2	-1.14144	0.0108805
CACNA2D4	-1.43511	9.73309e-09
PHC1	-1.20802	3.01103e-07
PCSK6	-1.45049	2.35438e-19
IL1R1	-1.09104	8.11082e-05
DAG1	-1.1922	0.014527
NPAS2	-1.47565	0.00120221
DVL3	-1.13984	0.0467941
PKHD1L1	-1.4084	0.00173761
AR	-1.16146	5.4754e-05
PGGT1B	-1.37962	9.07691e-05
OTOG	-1.53312	0.000195135
TUBB4A	-1.0651	0.00153638
DNMBP	-1.28083	0.0165995
UHMK1	-1.34332	0.00218536
GATAD2B	-1.29664	0.00117855
ITGA1	-1.21499	2.16593e-06
USP34	-1.24969	0.000113363
NECAB1	-2.19518	0.00194689
RAB11FIP3	-1.00434	2.78762e-05
NPTXR	-2.34379	0.00282855
ATF7	-1.57582	0.000192914
ARNTL	-1.36669	4.07742e-05
TRIP11	-1.34488	2.32225e-06
NTN4	-1.03991	0.000130817
COL6A1	-1.27638	1.73576e-05
TRIM9	-2.50814	0.0481729
ABHD2	-1.41488	0.0107897
FAT1	-1.18672	9.907e-06
NR5A2	-1.7282	0.00197692
NUP98	-1.05461	0.00294504
CYB5D1	-1.28507	0.0362577
COL6A2	-1.32839	0.000106791
ZFHX2	-1.01379	1.82467e-05
TDO2	-1.91088	0.0310233
FGF6	-1.33294	9.17534e-05
XYLT1	-1.81862	0.000106546
WNK2	-1.04024	0.000329488
MRGPRH	-1.22849	2.72349e-07
NR1D1	-1.00714	7.35941e-06
SLC38A4	-1.82077	2.95388e-11
NBEAL1	-1.20831	0.000590032
CAMK4	-1.26455	0.0361299
EDN3	-1.22742	0.00171915
PLEKHG1	-1.14073	6.29133e-11
ACE	-1.24814	1.06004e-09
LYST	-1.39634	0.00106976
ARSI	-1.36605	4.68251e-05
ADAMTSL3	-1.19694	1.87504e-08
ZFP366	-2.47652	9.45232e-06
VCAN	-1.2315	0.000171942
MMP15	-1.06891	1.31391e-08
ITGA2	-1.48537	0.0187403
GDF11	-1.08571	0.00279017
ADAMTS12	-2.08361	8.57667e-08
P2RY1	-1.07609	1.99738e-10
SIGLEC1	-1.18192	0.000610432
BMPR2	-1.76329	0.00113728
BACE1	-1.00041	3.53597e-06
KCNG4	-1.32708	2.33876e-16
CHRNA2	-1.44647	0.020541
PDE4A	-1.21079	3.3393e-14
COL4A2	-1.28698	7.52616e-06
SCN4A	-1.10881	0.00140403
MRS2	-1.27298	8.65709e-06
PLXNA1	-1.20539	3.4963e-05
ZFP750	-1.57142	1.11721e-09
HEG1	-1.51455	0.000386822
SGCD	-1.2118	1.57232e-05
LEPREL1	-1.40317	0.00148199
CDKL5	-2.12491	2.87945e-05
ZFP609	-1.17495	5.8135e-07
LCOR	-1.56126	1.23196e-05
COL15A1	-1.3074	0.00112586
ZFP551	-1.18149	0.0122719
NOS1AP	-1.07219	0.0306976
COL5A3	-1.08961	1.86015e-05
PRDM10	-1.4049	0.0048083
LOXL4	-1.02638	0.000479374
NPHP4	-1.34238	0.00592464
WNT5A	-1.04301	3.1841e-05
FAM65B	-1.57577	3.45972e-12
PDZD7	-1.21177	1.13936e-08
RCOR1	-1.19362	0.00402064
FGD4	-1.61221	1.7542e-08
MEGF6	-1.05374	5.96642e-05
NPNT	-1.46962	0.000250435
NHLRC3	-1.21898	0.000767695
KCNG1	-2.77617	0.0121137
TECTA	-1.03977	0.00376998
ZHX3	-1.31497	2.82401e-05
LYNX1	-1.05245	5.13423e-07
ROBO1	-1.80435	2.28507e-08
SLC26A1	-1.93696	0.00256668
TBCK	-1.37859	0.00194864
TRIM14	-1.22585	0.00144784
NETO2	-1.388	1.41042e-07
ARL5B	-1.57835	0.000113982
GPR17	-1.51699	0.000733146
SVEP1	-1.14658	2.72349e-07
SACS	-1.59143	1.44785e-05
SMAD3	-1.23391	8.55544e-07
KIF3C	-1.0383	3.75768e-06
ADAMTS2	-1.0447	6.81872e-05
ARHGAP5	-1.07432	6.53192e-05
SLC16A7	-1.022	0.0126857
EIF4EBP2	-1.34905	0.00983963
EGFR	-1.07931	4.17739e-08
TLL2	-2.24227	0.03495
EBF2	-1.407	1.21794e-08
RNF24	-1.03275	0.0194691
RTN4R	-1.47615	0.0178039
USP9X	-1.3405	0.0174985
PHF16	-1.14423	0.0242652
ZDHHC5	-1.03109	9.0807e-06
ABCA2	-1.15103	4.79068e-05
BMP8A	-1.9525	0.00185583
COL1A2	-1.22587	0.0453448
DPYSL5	-1.12242	0.00150951
COL4A1	-1.23453	2.78762e-05
EP300	-1.17563	8.81816e-08
MMP28	-1.30649	5.97467e-05
ASXL3	-1.94508	0.000533172
NTS	-1.34256	0.0292989
MAP3K3	-1.03221	0.000422248
C1GALT1	-1.22958	0.00204126
LRP5	-1.07659	0.000108315
FHL5	-1.36767	0.00144862
PRIMA1	-1.87114	0.000233163
MAP3K13	-1.50188	0.00180208
COL3A1	-1.55856	0.0316193
NR4A3	-2.19262	0.008721
SHROOM4	-1.94391	0.0157807
SNX29	-1.16738	0.000633543
HGF	-1.48779	0.0285661
SSH1	-1.35834	1.64728e-05
ZFP369	-1.51915	0.00217776
MAN1A	-1.03017	2.50421e-07
NDST1	-1.16164	0.00108992
PDE3A	-1.68212	1.1795e-05
COL4A3	-1.08141	7.96159e-06
GLIS3	-1.87546	0.00459915
GYS2	-1.176	0.0128849
KCNQ4	-1.187	0.0310666
FGF14	-1.27662	0.00929729
FLRT1	-1.24248	0.000110944
PPL	-1.04252	0.000228199
ABCA8B	-1.00282	8.16355e-06
PKD1	-1.27334	0.000658422
NOTCH3	-1.03029	2.80001e-05
KIF13B	-1.25261	0.0422939
ARSJ	-1.17122	0.0276657
HES5	-1.50854	0.0409036
SLC25A36	-1.27844	6.33454e-07
ZMIZ2	-1.13367	1.51013e-06
CIT	-1.34264	0.000602357
B4GALNT3	-1.02079	0.0414562
BTNL9	-1.03243	0.00324648
BC068281	-1.08403	0.000540355
CREB3L2	-1.25401	0.0015903
IRS2	-1.5143	0.000571417
FBXO40	-1.2397	0.0337557
FAT3	-1.269	0.00155836
TEAD4	-1.19811	0.00893762
WDFY3	-1.05659	3.15343e-05
COL6A6	-2.16482	3.3844e-11
ZFP652	-1.56173	4.39572e-06
HIVEP1	-1.06291	5.85611e-06
LAMA3	-1.57339	4.34796e-08
MED12	-1.08383	0.00278978
DST	-1.11453	1.87131e-05
WDFY2	-1.44961	0.00050841
ABL2	-1.00895	1.70041e-07
ATP2B3	-1.08498	0.0011209
GBGT1	-1.39355	0.0101438
SEMA5A	-1.47413	1.4941e-12
TRPM3	-1.36327	2.78762e-05
ERN1	-1.20629	0.0480894
NLGN3	-1.50623	0.0292607
GREM2	-2.44809	1.06004e-09
SLIT3	-1.11412	2.68917e-08
WASF3	-1.5627	0.00104958
COCH	-1.42462	1.02917e-05
SPRED2	-1.38713	0.00230971
MAST4	-1.148	5.41686e-05
HILS1	-1.15516	0.0141981
NID1	-1.2043	1.19648e-06
FAM46C	-1.36432	0.000335443
LOXL2	-1.15524	0.000145164
PROKR1	-1.74792	1.13596e-06
IQSEC1	-1.13401	3.64182e-07
SNPH	-1.63472	6.83178e-05
SLC6A4	-1.12052	0.0101746
TIAM1	-1.44876	3.13465e-05
EVI5L	-1.3111	0.00342937
ADAMTS4	-1.38711	0.00864387
DPP4	-1.08299	0.000116781
BMP5	-1.36392	1.30723e-06
STRN	-1.2008	0.00760118
MGAT5	-1.7248	0.000121221
IMPAD1	-1.05384	0.000471513
SUFU	-1.12217	0.00633946
SORCS1	-1.01266	0.00135874
INPP5J	-1.20655	1.02592e-05
HIST1H2AF	-2.26069	0.0108921
ITGA6	-1.10859	0.00272311
ITPKB	-1.3074	0.0114479
SNED1	-1.37068	0.00187074
ZFYVE26	-1.00054	4.99601e-05
HAS3	-1.28824	0.000111991
CLCN5	-1.68852	0.00438673
CREB5	-1.15945	0.000481768
MRGPRB1	-1.38567	0.00242978
WNT10B	-1.04066	0.0218681
NRK	-2.26597	0.0386958
LAMC1	-1.10896	6.56728e-08
DYRK2	-1.28071	6.48887e-07
ZFP382	-1.11518	0.00374125
ADCY9	-1.77748	0.0055486
MYH10	-1.13857	3.05934e-05
ROR1	-1.85331	0.000984311
MKL1	-1.04338	3.4759e-06
IGSF9B	-2.20865	0.00363388
FBN1	-1.54364	6.11995e-07
LY6G6E	-1.42281	0.00210969
SHC3	-1.21931	0.0456672
RALGPS1	-1.45454	0.000742839
ZFP532	-1.00275	4.73607e-08
PDE10A	-1.02283	3.91895e-06
MIAT	-1.05823	0.0367625
CYP2U1	-1.02604	0.0003078
AKAP12	-1.04817	5.09913e-09
PFKFB3	-1.08995	0.0316163
TNRC18	-1.03568	7.49097e-05
HIST1H1B	-2.14816	0.00901724
LAMA2	-1.01018	1.00929e-06
CBL	-1.67422	8.15388e-05
SSTR4	-1.99825	0.0283289
PCDH12	-1.27333	2.34768e-05
ABCA9	-1.46586	3.52882e-07
DNMT3A	-1.16314	2.65824e-15
LRP1	-1.00287	1.63233e-07
CPEB4	-2.07033	0.00157024
COL4A4	-1.36543	1.32426e-09
PALLD	-1.1726	0.000273543
ATP2B4	-1.1343	5.74437e-15
BICC1	-1.06425	4.27928e-10
PLCE1	-1.04181	2.30176e-07
CDK19	-1.15111	1.48278e-08
USP24	-1.07963	6.94689e-06
XRN1	-1.09838	0.00355636
MEF2A	-1.12155	0.049009
DENND4C	-1.29161	0.000148482
COL6A3	-1.43106	4.59365e-05
KLHL3	-1.06587	0.0193832
MLXIP	-1.13716	5.06887e-07
TTBK1	-1.05921	0.0192956
HIPK2	-2.01867	1.63036e-09
COL14A1	-1.02201	0.0233126
KDR	-1.27986	1.54964e-08
MOB1A	-1.27292	0.00578835
REL	-1.28042	2.70874e-06
LNPEP	-1.07086	0.00788265
DGKH	-1.01615	0.00100757
ZFP385B	-1.02822	0.00785917
PROX1	-1.49745	0.000992755
PAPLN	-1.74154	0.0015548
NT5C1A	-1.86485	0.00560484
TRPM6	-1.01523	0.0111604
TUBGCP6	-1.09209	0.00656262
HAS2	-1.31145	0.0024708
PSD3	-1.11873	6.33541e-08
RAPGEF5	-1.00502	0.0405006
SNTB1	-1.03604	0.0406545
TNXB	-1.02163	1.7727e-08
C3	-1.13368	2.46447e-05
ITGA4	-1.12497	0.000912604
KCNV2	-1.82	0.0141698
NCOR2	-1.21925	3.30453e-08
DAAM2	-1.06102	3.80974e-07
ZDHHC23	-1.40668	0.017604
DCLK3	-1.02509	0.000675217
HSPG2	-1.49165	5.85019e-08
ZFP526	-1.15377	0.00915675
LHX6	-1.06503	6.19154e-05
CCDC88C	-1.2748	0.000303931
HMBOX1	-1.72946	3.34172e-05
RET	-1.32138	1.57462e-09
ANGPTL1	-1.22796	5.4754e-05
PRELP	-1.09147	4.21047e-06
MYO7B	-1.43847	0.00253913
GRM1	-1.03563	0.00235596
TLR5	-1.10499	0.0346168
SLC36A4	-1.54161	0.0035918
COL1A1	-1.85801	0.00835499
PTPN4	-1.48622	2.71095e-05
MTR	-1.06683	0.000183387
AQP4	-1.00661	1.78263e-08
ZBTB16	-1.09581	0.000402803
BEST3	-1.85274	0.00135874
FREM1	-1.21371	0.00013979
FBXL18	-1.28307	0.00308305
DCHS1	-1.05633	0.00106809

## Sheet: eTableS9 Intersection 6m vs. 24
gene_id	log2 Fold Change	padj		eTable S9 GSEA and GOrilla Interactions Results from 6 to 24 months of age.
SLC38A4	-1.03755	0.0204068		KEY: padj = pvalue adjusted for multiple comparisons
LY6G6E	-1.59597	3.08432e-05		Data from GOrilla and GSEA intersected as explained in the main text.
GREM2	-1.41576	0.0147978
