# Supplementary material for: Skeletal Muscle Transcriptome Alterations Related to Declining Physical Function in Older Mice
Source: J Ageing Longev. Author manuscript; Available in PMC 2023 Oct 24. (PMC10597580; doi:10.3390/jal3020013)
Supplement: JAL3020013 Supplementary Material [file NIHMS1905574-supplement-JAL3020013__Supplementary_Material.zip › eTable S10-S16 6m--28m DEGs with Strong Association to CFAB and CFAB Determinants.xlsx]

## Sheet: eTableS10 6m vs. 28m CFAB
gene_id	slope	R	R2	intercept	pval	log2fc	padj
Dclk3	0.0405003	0.89935	0.80883	3.86381	5.07332e-06	-1.02509	0.000675217		eTable S10 6m vs. 28m. All gene expression changes greater than or equal to + or - log2fc 1 with padj<0.05, and with |R| greater than or equal to 0.70 from linear regression with CFAB (Comprehensive Functional Assessment Battery) at pval<0.05
Plekhg1	0.08536	0.896271	0.803301	7.09343	6.12403e-06	-1.14073	6.29133e-11		and with R greater than or equal to 0.70 from linear regression with CFAB (Comprehensive Functional Assessment Battery)
Zfp750	0.0778543	0.895211	0.801403	4.81243	6.52507e-06	-1.57142	1.11721e-09		KEY: m= months of age; slope, R2, R, Intercept, and pvall from linear regression of the gene's expression with CFAB,
Gabrd	-0.0533899	-0.885624	0.78433	3.83909	1.1255e-05	1.20057	4.11624e-05
Erc2	-0.172237	-0.882122	0.778139	4.28984	1.35731e-05	3.54275	4.92333e-20
Ier3	-0.09216	-0.881459	0.776969	7.17195	1.4054e-05	1.22717	3.13816e-13
P2ry1	0.0857034	0.88078	0.775773	8.16343	1.45609e-05	-1.07609	1.99738e-10
Kdr	0.113836	0.88013	0.774629	10.6155	1.50599e-05	-1.27986	1.54964e-08
Pde4a	0.0994419	0.877404	0.769838	10.9006	1.73112e-05	-1.21079	3.3393e-14
Zyg11a	0.0570057	0.874788	0.765254	4.13427	1.97285e-05	-1.3292	1.50626e-05
Pcdh12	0.111831	0.872928	0.762004	7.44564	2.16112e-05	-1.27333	2.34768e-05
Lynx1	0.0963864	0.872916	0.761982	12.1117	2.16247e-05	-1.05245	5.13423e-07
Lhfpl4	-0.0465798	-0.8551	0.731196	4.09754	4.8508e-05	1.01485	9.99275e-05
Tspan18	0.0795059	0.854804	0.73069	5.87476	4.91184e-05	-1.12006	4.07742e-05
Kcng4	0.104479	0.85339	0.728275	10.729	5.21247e-05	-1.32708	2.33876e-16
BC051142	-0.0610998	-0.850053	0.72259	2.51553	5.98292e-05	2.46217	2.77004e-05
Cacna2d4	0.118048	0.849271	0.721262	8.66299	6.17636e-05	-1.43511	9.73309e-09
Spint2	-0.0973843	-0.843845	0.712074	6.43665	7.66656e-05	1.43636	3.42069e-14
Cyp1a1	-0.0756437	-0.842289	0.709451	4.88214	8.14458e-05	1.21147	1.03998e-05
Mmp15	0.088024	0.840715	0.706801	9.48234	8.65307e-05	-1.06891	1.31391e-08
Vwa3a	0.0664101	0.840645	0.706684	4.80304	8.67618e-05	-1.18408	0.000132227
Frem1	0.0551233	0.839335	0.704483	4.21767	9.12002e-05	-1.21371	0.00013979
Gm5105	0.152977	0.839013	0.703943	7.95477	9.23176e-05	-1.93046	2.68917e-08
Mfap3l	0.077907	0.838301	0.702749	7.79469	9.48314e-05	-1.08915	2.26987e-15
Dnmt3a	0.0904602	0.837021	0.700604	10.9293	9.9494e-05	-1.16314	2.65824e-15
Rbm3	-0.104135	-0.836885	0.700376	9.70405	0.000100002	1.35511	1.1783e-12
Akap12	0.0817504	0.835578	0.698191	8.34669	0.000104975	-1.04817	5.09913e-09
Col4a3	0.0719312	0.834943	0.697131	5.85307	0.000107462	-1.08141	7.96159e-06
Psd3	0.0937943	0.833475	0.694681	9.8243	0.000113403	-1.11873	6.33541e-08
Atp2b4	0.0848927	0.833399	0.694554	8.7139	0.000113719	-1.1343	5.74437e-15
Nr1d1	0.0914307	0.827489	0.684739	12.3815	0.000140501	-1.00714	7.35941e-06
Ctxn3	-0.101537	-0.826255	0.682698	9.58014	0.0001467	1.27295	3.44813e-08
Itga1	0.101799	0.824111	0.679159	8.36728	0.000158006	-1.21499	2.16593e-06
Cyr61	-0.0915673	-0.823544	0.678225	9.85651	0.000161113	1.20679	8.86102e-15
Heatr5a	0.0843412	0.820287	0.67287	9.67239	0.000179944	-1.00062	6.66117e-07
1700101I11Rik	-0.0390616	-0.816698	0.666996	2.38013	0.000202746	2.209	3.82282e-05
Lhfpl3	-0.0275459	-0.815908	0.665706	1.57825	0.000208069	2.14642	0.00387266
Inpp5j	0.0935144	0.815466	0.664985	7.01596	0.0002111	-1.20655	1.02592e-05
Gnmt	-0.0848801	-0.81538	0.664845	4.47596	0.000211691	1.60698	8.244e-07
Pogk	0.0881172	0.815079	0.664354	8.86366	0.00021378	-1.1407	1.05869e-09
Gm2694	-0.033055	-0.814725	0.663778	1.61859	0.000216256	3.01735	0.000532135
Hspg2	0.127265	0.814407	0.663259	12.5255	0.000218502	-1.49165	5.85019e-08
Col4a2	0.11597	0.813671	0.662061	11.5677	0.000223775	-1.28698	7.52616e-06
2210403K04Rik	-0.0972409	-0.81272	0.660514	9.48796	0.000230738	1.36167	8.16237e-24
Tmem229a	0.0358407	0.81166	0.658792	3.06665	0.000238707	-1.30432	0.00150117
Lama3	0.0912924	0.811393	0.658358	5.6367	0.000240752	-1.57339	4.34796e-08
Dagla	0.112502	0.809624	0.655492	8.22063	0.000254646	-1.55593	1.38446e-13
Caly	-0.0533204	-0.808968	0.65443	3.2888	0.000259964	1.49019	0.0001735
Zfp366	0.152231	0.808642	0.653902	6.02915	0.000262645	-2.47652	9.45232e-06
Slc25a36	0.104347	0.806589	0.650586	8.8723	0.000280022	-1.27844	6.33454e-07
Btaf1	0.113326	0.806491	0.650428	9.61842	0.000280876	-1.55249	2.00893e-18
Col4a1	0.112086	0.805565	0.648935	11.8947	0.000289038	-1.23453	2.78762e-05
A530013C23Rik	-0.0771968	-0.80538	0.648637	6.07962	0.00029069	1.11728	3.75768e-06
Fgd4	0.117395	0.805188	0.648327	7.36434	0.000292418	-1.61221	1.7542e-08
Snhg1	-0.0761115	-0.803976	0.646378	6.62659	0.000303487	1.08821	1.2849e-07
Asl	-0.0754407	-0.802292	0.643672	6.93876	0.000319454	1.10301	4.04956e-10
Trpm3	0.0555239	0.801972	0.643159	4.13174	0.00032256	-1.36327	2.78762e-05
Daam2	0.0801867	0.801821	0.642917	7.58841	0.000324034	-1.06102	3.80974e-07
Megf6	0.0523595	0.801057	0.641693	4.68894	0.000331583	-1.05374	5.96642e-05
Ncor2	0.0996719	0.800652	0.641044	11.8277	0.000335643	-1.21925	3.30453e-08
Amy1	-0.0861767	-0.800256	0.640409	10.0901	0.000339659	1.19282	4.52527e-16
Gm6307	0.0803647	0.798795	0.638073	9.26745	0.000354793	-1.0924	5.26305e-13
Depdc7	-0.0811547	-0.798569	0.637712	5.9773	0.000357183	1.36182	4.9956e-20
Zfp532	0.0781939	0.798066	0.63691	8.93015	0.000362543	-1.00275	4.73607e-08
Ccdc8	0.0572813	0.798062	0.636902	4.21284	0.000362591	-1.49547	5.51289e-07
Fbp1	-0.0180033	-0.798007	0.636815	0.540968	0.000363177	2.97399	0.00679707
Gm5567	0.0317338	0.797893	0.636633	1.99651	0.000364407	-1.93044	0.00489289
Irf7	-0.0907247	-0.797135	0.635424	6.34573	0.000372648	1.17849	3.82282e-05
Cebpb	-0.0873157	-0.79645	0.634332	10.2196	0.000380229	1.06251	1.12142e-05
2010300C02Rik	-0.093717	-0.796332	0.634145	5.24922	0.000381543	1.57252	1.01892e-07
Sacs	0.0816997	0.796105	0.633784	4.85293	0.000384089	-1.59143	1.44785e-05
Sema5a	0.091695	0.794479	0.631197	6.62584	0.000402746	-1.47413	1.4941e-12
Spata24	-0.0867301	-0.794266	0.630858	5.74289	0.000405241	1.34494	1.58325e-07
Raver2	0.0945141	0.794129	0.630641	7.99823	0.00040685	-1.23875	1.49458e-07
Ston1	0.118899	0.793326	0.629366	6.34329	0.000416412	-1.76535	4.61902e-06
Cebpd	-0.117641	-0.792427	0.627941	8.33413	0.000427328	1.1028	0.00665736
Pcsk6	0.0994805	0.792133	0.627475	8.44481	0.000430949	-1.45049	2.35438e-19
Kif3c	0.0881057	0.791507	0.626484	10.7474	0.00043874	-1.0383	3.75768e-06
Ifit1	-0.0954897	-0.790811	0.625382	5.94388	0.000447539	1.25363	0.000165843
Sgcd	0.103072	0.790716	0.625231	8.87189	0.000448759	-1.2118	1.57232e-05
Slc10a6	-0.0736871	-0.789668	0.623575	5.13523	0.000462308	1.03568	0.00120221
Odz4	0.0569041	0.787224	0.619722	3.85184	0.000495198	-1.52085	0.00011288
Mlxip	0.093993	0.786257	0.6182	11.356	0.000508727	-1.13716	5.06887e-07
Ralgps1	0.0914415	0.786002	0.617799	5.29433	0.000512346	-1.45454	0.000742839
Gm16576	0.0935814	0.785788	0.617463	7.91576	0.000515395	-1.02133	0.000824333
Mgat5	0.0490412	0.785704	0.617331	3.26268	0.000516602	-1.7248	0.000121221
Grm1	0.064581	0.785478	0.616975	5.01941	0.000519853	-1.03563	0.00235596
1700020I14Rik	0.133111	0.784994	0.616215	11.6756	0.000526856	-1.55509	1.00929e-06
Spnb2	0.0830164	0.78479	0.615895	12.2137	0.000529834	-1.0297	1.19519e-07
Ppp1r1a	-0.12586	-0.784789	0.615894	9.29686	0.000529843	1.59812	2.32225e-06
Slc38a4	0.138002	0.78416	0.614907	11.4036	0.000539105	-1.82077	2.95388e-11
Gadd45g	-0.097964	-0.783913	0.61452	9.63706	0.000542781	1.18032	1.125e-05
Lgals3	-0.157837	-0.783427	0.613759	7.08772	0.000550064	2.06212	0.000171906
Trip11	0.111308	0.781528	0.610787	9.21916	0.000579306	-1.34488	2.32225e-06
Wnt5a	0.0766387	0.78091	0.609821	6.76196	0.000589096	-1.04301	3.1841e-05
Rel	0.0773246	0.780638	0.609396	5.73442	0.00059344	-1.28042	2.70874e-06
Mkl1	0.0860061	0.780627	0.609379	10.0336	0.000593619	-1.04338	3.4759e-06
Adra1a	0.0686533	0.780461	0.609119	4.98549	0.000596298	-1.3291	8.89349e-06
Mast4	0.10309	0.780249	0.608788	10.4663	0.000599716	-1.148	5.41686e-05
9830001H06Rik	0.0876633	0.780131	0.608604	8.12822	0.000601625	-1.15326	2.41731e-07
Fat4	0.0997641	0.779873	0.608202	7.76751	0.000605815	-1.38248	1.21794e-08
Pde3a	0.0919471	0.779663	0.607874	5.25993	0.000609256	-1.68212	1.1795e-05
Ntn4	0.0842724	0.779589	0.607759	7.30321	0.000610461	-1.03991	0.000130817
Mustn1	-0.118332	-0.779497	0.607616	10.9177	0.000611971	1.67559	1.52261e-16
Ctla2b	-0.071337	-0.779381	0.607435	5.47981	0.000613878	1.0555	8.83482e-05
Fam5b	0.0390883	0.778244	0.605664	3.18147	0.000632859	-1.25155	0.00360211
Gm4013	-0.0346912	-0.777458	0.604441	2.76305	0.000646254	1.38909	0.00148081
Akap5	0.0644264	0.77687	0.603527	4.90908	0.000656433	-1.00331	0.00540857
3632451O06Rik	-0.081152	-0.776177	0.602451	6.95545	0.000668578	1.14154	5.26409e-08
Zfp382	0.0359525	0.776044	0.602244	3.32209	0.000670939	-1.11518	0.00374125
Cacna1g	0.0675973	0.775376	0.601208	6.25903	0.000682864	-1.07049	1.07669e-06
Mrs2	0.106188	0.775013	0.600645	9.03604	0.000689415	-1.27298	8.65709e-06
1700029F09Rik	-0.0644698	-0.774689	0.600143	5.7953	0.000695306	1.0167	4.01018e-06
Prap1	0.0352246	0.774561	0.599945	1.96218	0.000697638	-2.51258	0.000480183
Crybg3	0.0982706	0.774281	0.599512	9.9828	0.000702767	-1.13134	2.54433e-05
Gan	0.0706665	0.773742	0.598677	4.89533	0.000712749	-1.34314	0.000103784
9930111J21Rik1	0.0522577	0.773695	0.598605	3.58769	0.000713615	-1.71146	9.0807e-06
Papln	0.111987	0.772523	0.596792	5.40238	0.000735726	-1.74154	0.0015548
Foxn3	0.088013	0.772324	0.596485	9.73292	0.000739533	-1.11549	2.86048e-07
Lamc3	0.0551008	0.772115	0.596162	4.51193	0.000743554	-1.27495	2.32545e-05
Col15a1	0.128949	0.772091	0.596125	9.65224	0.00074401	-1.3074	0.00112586
Accn1	-0.0377928	-0.771017	0.594467	2.44163	0.000764954	1.44962	0.00782949
Plxna1	0.103935	0.771014	0.594462	9.36784	0.000765016	-1.20539	3.4963e-05
Psmg4	-0.0888262	-0.770486	0.593649	6.6189	0.000775469	1.33233	1.21794e-08
2310016D03Rik	0.0990032	0.769766	0.592539	7.24097	0.000789941	-1.23043	0.00015155
Spen	0.0888126	0.769333	0.591874	9.82913	0.000798726	-1.12633	3.94133e-07
Rtn4rl2	-0.0578419	-0.769152	0.591595	3.67134	0.000802437	1.22551	0.00272311
Fbxo48	0.0228356	0.768502	0.590596	1.27267	0.000815843	-2.57941	0.00298057
Atp5l	-0.0730745	-0.768221	0.590164	7.99016	0.000821696	1.01661	1.60611e-07
Rpl12	-0.0878553	-0.768067	0.589927	11.424	0.000824922	1.16818	1.30544e-07
Sec14l5	0.164241	0.767759	0.589453	8.59988	0.000831405	-1.90239	0.000416436
Nr5a2	0.0422591	0.767479	0.589023	2.7559	0.000837329	-1.7282	0.00197692
Dopey2	0.0838048	0.767394	0.588893	9.73421	0.000839127	-1.11347	9.78717e-09
Lamc1	0.086181	0.767013	0.588309	11.1601	0.000847246	-1.10896	6.56728e-08
Ebf2	0.0862332	0.766899	0.588134	6.29343	0.000849699	-1.407	1.21794e-08
Nid1	0.0950096	0.766387	0.587349	10.5464	0.000860737	-1.2043	1.19648e-06
Ccdc104	-0.0760697	-0.766165	0.587008	7.65129	0.000865574	1.14823	4.74316e-15
Naalad2	0.0720884	0.765956	0.586688	6.86123	0.00087014	-1.07916	3.94133e-07
Myh10	0.0965026	0.765723	0.586331	9.20354	0.000875254	-1.13857	3.05934e-05
Glul	-0.0945569	-0.765286	0.585663	11.789	0.000884896	1.17096	1.12038e-05
5031439G07Rik	0.0812519	0.764782	0.584891	12.0899	0.00089614	-1.01679	5.85123e-07
Nradd	-0.0529953	-0.764229	0.584046	4.6533	0.000908592	1.03734	4.03782e-05
D330050I16Rik	-0.0587268	-0.764168	0.583953	3.61949	0.000909972	1.44691	0.000256752
Cxcl10	-0.119376	-0.763931	0.583591	4.39862	0.000915364	2.6054	1.89818e-11
Rab11fip3	0.0865033	0.763758	0.583326	11.7094	0.00091932	-1.00434	2.78762e-05
Nt5c	-0.0718982	-0.763662	0.58318	6.45428	0.000921511	1.06668	2.43127e-06
Ptar1	0.0646922	0.763568	0.583036	5.60203	0.000923669	-1.15454	6.24556e-07
Cit	0.0571546	0.762234	0.581	4.10864	0.000954731	-1.34264	0.000602357
Tmem8	-0.0693505	-0.762023	0.580679	5.53028	0.000959724	1.19805	5.28708e-08
Rpl13a	-0.0853221	-0.761171	0.579382	12.3428	0.000980062	1.14491	8.76255e-08
Abca2	0.100092	0.760827	0.578858	10.0039	0.000988393	-1.15103	4.79068e-05
Golga7b	-0.0819423	-0.76063	0.578558	6.59418	0.000993183	1.20521	5.85019e-08
Wdfy3	0.0902126	0.760503	0.578365	10.2184	0.000996278	-1.05659	3.15343e-05
Mrgprh	0.0767048	0.760144	0.577818	6.25266	0.00100509	-1.22849	2.72349e-07
Nos1	0.227038	0.760072	0.577709	10.8048	0.00100685	-2.41179	0.000887102
Zfp609	0.0918899	0.759376	0.576651	9.48694	0.00102411	-1.17495	5.8135e-07
Auts2	0.105136	0.758389	0.575155	8.79406	0.00104898	-1.36441	6.63145e-07
Fat3	0.100311	0.758347	0.57509	6.56102	0.00105007	-1.269	0.00155836
Arntl	0.111717	0.758027	0.574604	8.8599	0.00105825	-1.36669	4.07742e-05
Cyyr1	0.143745	0.757927	0.574454	7.29623	0.0010608	-1.78824	0.00144724
Bahcc1	0.0912482	0.757711	0.574125	8.05562	0.00106638	-1.1592	1.43219e-05
Rpl3	-0.0889611	-0.757649	0.574031	9.73246	0.00106798	1.30029	1.5693e-07
4831426I19Rik	0.0988825	0.757571	0.573913	6.27343	0.00106999	-1.57552	6.24556e-07
Itga11	0.0916762	0.757473	0.573766	6.48202	0.00107251	-1.56496	1.71125e-12
Pcnx	0.0848998	0.757285	0.57348	11.7857	0.00107742	-1.06933	5.8135e-07
Ptpn4	0.120674	0.756922	0.572931	8.26958	0.00108689	-1.48622	2.71095e-05
Snhg11	-0.0700451	-0.756422	0.572174	4.34274	0.00110005	1.48803	2.14664e-06
Hivep1	0.0856343	0.756202	0.571841	9.38156	0.00110589	-1.06291	5.85611e-06
Ctla2a	-0.0943996	-0.75613	0.571733	7.48914	0.00110779	1.2639	2.26408e-05
Padi1	-0.0464247	-0.755458	0.570717	2.10863	0.0011258	2.72336	0.000192442
Rps20	-0.0851049	-0.75304	0.567069	11.7624	0.00119252	1.15359	1.01617e-07
Ret	0.082365	0.752864	0.566804	6.67388	0.00119749	-1.32138	1.57462e-09
Uap1l1	-0.0757624	-0.752853	0.566788	7.11895	0.00119779	1.05926	4.57437e-06
Arhgap20	0.139843	0.752847	0.566779	9.91061	0.00119796	-1.76844	2.06765e-07
D630003M21Rik	0.0593597	0.752591	0.566393	5.74541	0.00120526	-1.02863	2.16593e-06
8430408G22Rik	-0.0981501	-0.751828	0.565245	6.94196	0.00122715	1.29431	3.72159e-05
Aqp4	0.0745145	0.751545	0.56482	10.0307	0.00123533	-1.00661	1.78263e-08
Ankrd1	-0.178912	-0.750218	0.562828	9.6037	0.00127438	2.68099	1.03048e-17
Dbf4	-0.0641257	-0.750215	0.562822	3.86891	0.00127448	1.48938	9.53283e-05
Hmbox1	0.125625	0.750201	0.562801	6.92493	0.0012749	-1.72946	3.34172e-05
Abl2	0.0764975	0.75017	0.562756	9.89758	0.00127581	-1.00895	1.70041e-07
Col4a4	0.0665482	0.749668	0.562003	5.28849	0.00129085	-1.36543	1.32426e-09
Scg5	-0.0293639	-0.749423	0.561635	1.39348	0.00129825	2.73735	0.00293627
Adamts12	0.113173	0.74918	0.56127	5.7424	0.00130563	-2.08361	8.57667e-08
Baiap3	-0.0333753	-0.748954	0.560932	2.51641	0.0013125	1.55882	0.00179046
Lgi2	0.0782371	0.747509	0.55877	4.62786	0.00135718	-1.99734	5.84426e-11
Mbd5	0.108352	0.747483	0.558732	8.60444	0.001358	-1.29544	6.01485e-05
Tbcb	-0.0713524	-0.747304	0.558464	9.02451	0.00136363	1.00553	4.73546e-08
Phc1	0.0918875	0.746931	0.557906	9.18842	0.00137541	-1.20802	3.01103e-07
Iqsec1	0.0885904	0.746705	0.557569	11.1562	0.00138258	-1.13401	3.64182e-07
Cacna1c	0.0841617	0.746568	0.557365	6.13587	0.00138694	-1.29007	3.37513e-05
Zfhx2	0.0778321	0.74627	0.556918	7.95355	0.0013965	-1.01379	1.82467e-05
Zfp652	0.127626	0.745967	0.556466	9.71245	0.00140625	-1.56173	4.39572e-06
2700086A05Rik	0.0337511	0.745949	0.55644	2.19729	0.00140683	-2.31108	0.000153004
Leprel1	0.0759737	0.745862	0.55631	4.84352	0.00140964	-1.40317	0.00148199
Nbeal1	0.110394	0.745549	0.555843	8.98023	0.00141978	-1.20831	0.000590032
Dchs1	0.0898874	0.745536	0.555823	7.40729	0.00142021	-1.05633	0.00106809
Gm15800	0.0890311	0.745432	0.555669	9.71684	0.00142359	-1.07636	2.61143e-05
Pdzd7	0.0839914	0.744066	0.553634	7.89658	0.00146865	-1.21177	1.13936e-08
Gm5113	0.11458	0.74403	0.553581	7.6742	0.00146986	-1.26838	0.0020155
Dst	0.0937185	0.743393	0.552634	14.0012	0.00149126	-1.11453	1.87131e-05
Best3	0.16277	0.742428	0.5512	8.60121	0.00152419	-1.85274	0.00135874
Prox1	0.0425282	0.742166	0.55081	3.19888	0.00153325	-1.49745	0.000992755
Col6a6	0.121798	0.741977	0.55053	6.35531	0.0015398	-2.16482	3.3844e-11
Zfp493	0.0615749	0.741652	0.550048	5.88248	0.00155111	-1.02045	1.41986e-05
Necab1	0.0341911	0.741364	0.54962	1.97122	0.0015612	-2.19518	0.00194689
C7	0.130737	0.741298	0.549523	8.08022	0.00156349	-1.91902	1.34705e-09
Ep300	0.089102	0.741181	0.549349	10.716	0.00156762	-1.17563	8.81816e-08
Usp24	0.0879343	0.741159	0.549317	12.2388	0.00156838	-1.07963	6.94689e-06
Map3k13	0.0899083	0.741013	0.5491	5.16515	0.00157354	-1.50188	0.00180208
Hipk2	0.14808	0.740868	0.548886	9.83979	0.00157866	-2.01867	1.63036e-09
Tesc	-0.058672	-0.740353	0.548122	3.72607	0.00159701	1.35333	0.000791459
1700112E06Rik	-0.0661542	-0.740341	0.548105	5.12251	0.00159742	1.29701	8.81043e-09
Gins1	-0.0527593	-0.740091	0.547734	4.88037	0.00160639	1.04563	9.48171e-06
Rgs9bp	0.0717758	0.739657	0.547092	4.61431	0.00162204	-1.60406	2.09469e-05
Cyp2u1	0.0774776	0.739523	0.546895	6.83744	0.00162688	-1.02604	0.0003078
E030010A14Rik	-0.0705493	-0.738964	0.546068	4.46439	0.00164726	1.43973	1.16999e-05
Cdk19	0.0846622	0.738425	0.545271	10.1495	0.00166713	-1.15111	1.48278e-08
Fam196b	-0.0570674	-0.736834	0.542924	4.45469	0.00172683	1.21065	1.1425e-05
Creb5	0.0486538	0.736629	0.542622	4.19939	0.00173465	-1.15945	0.000481768
Zfp180	0.0754323	0.735743	0.541318	9.04395	0.00176874	-1.05356	2.68917e-08
Rpl38	-0.0844996	-0.735246	0.540586	9.65421	0.00178814	1.16717	6.167e-07
Treml1	-0.0336436	-0.735137	0.540426	1.63791	0.00179241	2.31415	0.00528425
Ccdc48	0.0469348	0.734969	0.54018	3.51132	0.00179898	-1.63279	2.45851e-05
Ttll4	0.112142	0.734611	0.539654	7.71453	0.00181312	-1.41399	8.98078e-05
Rps12	-0.0802917	-0.734348	0.539267	11.2288	0.00182355	1.06526	6.35913e-06
Atf7	0.124443	0.7337	0.538315	7.36436	0.00184949	-1.57582	0.000192914
Robo1	0.0790129	0.733694	0.538307	4.89215	0.00184972	-1.80435	2.28507e-08
Soat2	-0.0380962	-0.73368	0.538287	1.60827	0.00185027	2.51707	0.00547524
Mt3	-0.150793	-0.733666	0.538266	5.0358	0.00185083	2.93223	1.28309e-12
Fgf6	0.075051	0.733133	0.537484	5.33699	0.00187239	-1.33294	9.17534e-05
Ddit4	-0.0850219	-0.733017	0.537314	7.91863	0.00187711	1.08988	4.89323e-05
Adamtsl3	0.0737924	0.733012	0.537307	6.64534	0.0018773	-1.19694	1.87504e-08
Asb18	0.131667	0.73275	0.536922	8.03874	0.00188802	-1.46004	0.00125316
Heatr5b	0.0793076	0.732572	0.536661	8.17761	0.00189531	-1.00045	7.04805e-05
Fads2	0.0611032	0.732335	0.536315	5.30143	0.00190504	-1.04452	0.000404007
Pggt1b	0.110113	0.732311	0.53628	7.86007	0.00190602	-1.37962	9.07691e-05
Itih5	0.0842805	0.731795	0.535524	9.32506	0.00192737	-1.12446	3.08038e-06
Slfn3	0.0542723	0.731747	0.535453	3.8217	0.00192939	-1.5193	0.000334301
Rps19	-0.0738739	-0.73156	0.53518	10.0742	0.00193718	1.00203	2.4292e-06
Scx	-0.0742019	-0.731542	0.535153	7.34783	0.00193793	1.07953	1.42154e-06
Pdzd2	0.0942174	0.730695	0.533915	9.57801	0.00197357	-1.2404	1.0009e-06
Bmpr2	0.156377	0.730141	0.533106	9.36526	0.00199714	-1.76329	0.00113728
Ror1	0.0751362	0.729513	0.532189	4.18669	0.00202418	-1.85331	0.000984311
Dyrk2	0.0972059	0.729262	0.531823	9.70914	0.00203505	-1.28071	6.48887e-07
Tiam1	0.108204	0.72919	0.531718	7.53483	0.00203816	-1.44876	3.13465e-05
Clec1b	-0.0621522	-0.728928	0.531336	2.69594	0.00204959	2.07451	0.00148505
Eif2c2	0.158559	0.728626	0.530896	9.90105	0.0020628	-1.85436	0.000398328
Rps27a	-0.0795828	-0.7286	0.530858	11.0494	0.00206396	1.09043	1.07669e-06
Tspo	-0.0807693	-0.728318	0.530447	8.60612	0.00207636	1.13064	6.52387e-07
Rpl35	-0.0713543	-0.728199	0.530273	10.3117	0.00208165	1.00138	1.64504e-07
Adamts3	0.0443966	0.728112	0.530148	3.97327	0.00208547	-1.29654	3.89592e-05
Pax7	0.0909808	0.728004	0.52999	5.34699	0.00209028	-1.60409	0.000786393
Zhx3	0.100249	0.72774	0.529606	7.78887	0.00210199	-1.31497	2.82401e-05
Prkcz	-0.110421	-0.727572	0.529361	5.8545	0.00210952	1.87178	3.31045e-09
1700011I03Rik	-0.0684378	-0.72734	0.529023	3.34972	0.00211991	2.11628	5.5415e-06
Edn3	0.0475585	0.726769	0.528193	3.84322	0.00214566	-1.22742	0.00171915
2610019E17Rik	-0.0417118	-0.725759	0.526726	3.01357	0.00219182	1.20118	0.00983794
Gstm2	-0.0797855	-0.725757	0.526724	9.67173	0.0021919	1.1977	1.60152e-13
A930015D03Rik	-0.0473565	-0.725686	0.52662	3.97821	0.00219518	1.02491	0.00200551
Zbtb37	0.0585972	0.725445	0.52627	4.53784	0.00220635	-1.06873	0.00780443
Pde10a	0.0710497	0.725298	0.526058	7.35042	0.00221313	-1.02283	3.91895e-06
Tcap	-0.0779558	-0.724938	0.525535	15.8952	0.00222995	1.08463	1.04214e-07
2610002J02Rik	-0.0717774	-0.724776	0.5253	5.71449	0.00223753	1.22944	4.06533e-07
Rpl36a	-0.0785302	-0.724674	0.525153	9.94788	0.00224227	1.06738	4.62652e-06
Lhx6	0.0620632	0.724065	0.52427	5.59249	0.00227104	-1.06503	6.19154e-05
Fau	-0.0823365	-0.723853	0.523963	10.7747	0.0022811	1.11928	3.19385e-06
2410006H16Rik	-0.0780608	-0.723057	0.522812	6.83206	0.00231922	1.08998	6.85985e-05
Tnrc18	0.0860257	0.723016	0.522752	10.3091	0.00232122	-1.03568	7.49097e-05
Lcor	0.0967536	0.722988	0.522712	6.14319	0.00232258	-1.56126	1.23196e-05
Ccdc88c	0.113738	0.722371	0.521819	9.98762	0.00235254	-1.2748	0.000303931
Mtr	0.0888889	0.722155	0.521508	8.9295	0.00236306	-1.06683	0.000183387
Zdhhc5	0.0819613	0.722064	0.521377	11.6289	0.00236753	-1.03109	9.0807e-06
Rps13	-0.0740984	-0.721665	0.5208	11.0618	0.00238717	1.01696	2.02694e-06
Fat1	0.0797594	0.721484	0.520539	6.90735	0.00239612	-1.18672	9.907e-06
Rhoc	-0.0684153	-0.721145	0.52005	9.34912	0.00241296	1.03916	1.7088e-11
Tppp2	-0.0368358	-0.721096	0.51998	3.336	0.00241538	1.09387	0.0029539
Palld	0.10258	0.720647	0.519332	9.74874	0.00243787	-1.1726	0.000273543
Abca8b	0.0769021	0.72061	0.519279	9.41368	0.0024397	-1.00282	8.16355e-06
Bend5	-0.0438548	-0.72015	0.518617	3.58441	0.00246288	1.27902	0.000175538
Xylt1	0.0997409	0.720113	0.518562	5.41169	0.0024648	-1.81862	0.000106546
Ifit3	-0.0823702	-0.719378	0.517505	6.07411	0.0025022	1.0571	0.0019037
Tecta	0.051597	0.718339	0.516011	4.41458	0.00255595	-1.03977	0.00376998
Fhl5	0.0571778	0.717713	0.515111	4.04458	0.00258877	-1.36767	0.00144862
Nt5c1a	0.162035	0.717553	0.514882	7.9873	0.0025972	-1.86485	0.00560484
Cstb	-0.0787025	-0.717206	0.514384	7.19768	0.00261558	1.1554	7.74367e-06
Fxyd7	-0.0583295	-0.717009	0.514102	4.28664	0.00262605	1.11105	0.00180031
Huwe1	0.0928423	0.716731	0.513703	12.5611	0.00264091	-1.03379	0.000465616
2310050B05Rik	-0.0923834	-0.716418	0.513255	8.97052	0.00265769	1.36988	1.62e-09
C1qtnf4	-0.091766	-0.71593	0.512556	7.70346	0.00268403	1.22112	9.38898e-05
Notch3	0.081934	0.715921	0.512542	9.84589	0.00268455	-1.03029	2.80001e-05
Rps21	-0.0823076	-0.715263	0.511601	11.2637	0.00272041	1.12504	4.13583e-06
Dpysl5	0.0495671	0.714713	0.510815	4.23484	0.00275065	-1.12242	0.00150951
Romo1	-0.0705407	-0.714028	0.509835	10.2895	0.00278879	1.01523	1.13768e-07
Zmiz2	0.0860746	0.713972	0.509756	10.9048	0.00279189	-1.13367	1.51013e-06
Btbd8	0.0656348	0.71395	0.509724	4.03491	0.00279315	-1.80452	0.000173319
Psmb4	-0.0713126	-0.713033	0.508415	11.5956	0.00284486	1.0168	1.75741e-07
Fam129a	0.0884756	0.712947	0.508293	8.015	0.00284973	-1.13724	0.000100374
Nwd1	0.0746981	0.712592	0.507788	5.81223	0.00286995	-1.01952	0.00610023
Ace	0.0858987	0.712527	0.507695	10.0392	0.00287366	-1.24814	1.06004e-09
Fbxl22	-0.0766381	-0.712323	0.507404	6.84206	0.00288539	1.09652	2.01781e-05
Arhgap5	0.0881173	0.712113	0.507105	10.3128	0.00289748	-1.07432	6.53192e-05
Tmem37	-0.0774794	-0.711401	0.506091	9.62555	0.00293874	1.00635	0.000106945
Usp34	0.106271	0.711347	0.506014	10.7355	0.00294192	-1.24969	0.000113363
Ssh1	0.089329	0.711059	0.505606	6.61002	0.00295871	-1.35834	1.64728e-05
Neto2	0.0912596	0.710834	0.505285	7.66327	0.00297193	-1.388	1.41042e-07
Dock3	-0.0311216	-0.710489	0.504795	2.56219	0.00299229	1.5679	0.000999397
Arsi	0.0636466	0.71047	0.504767	4.80848	0.00299344	-1.36605	4.68251e-05
H2afj	-0.070893	-0.709801	0.503817	8.21854	0.00303323	1.06318	4.97642e-08
Bcl9	0.0795147	0.709573	0.503493	6.51598	0.00304689	-1.05746	0.00155623
Gna12	0.0987478	0.709539	0.503445	8.96938	0.00304893	-1.22157	7.59499e-05
Id1	-0.0777323	-0.70938	0.50322	7.8551	0.00305844	1.06583	3.66828e-05
A630055G03Rik	0.068594	0.709299	0.503105	5.75873	0.00306333	-1.19878	1.44785e-05
Ar	0.0870319	0.709007	0.502691	8.04044	0.00308096	-1.16146	5.4754e-05
Dennd4c	0.109482	0.708978	0.50265	9.76114	0.0030827	-1.29161	0.000148482
Pcdhga11	0.0562596	0.708461	0.501917	3.95732	0.00311415	-1.59185	0.000185639
BC068281	0.0771203	0.708152	0.50148	6.47429	0.00313306	-1.08403	0.000540355
Tecpr2	0.0730636	0.707788	0.500964	9.16069	0.00315548	-1.07503	1.46414e-07
Ift27	-0.0720494	-0.707143	0.500051	7.30492	0.00319546	1.02148	3.4845e-05
Arl5b	0.12021	0.706842	0.499625	7.60145	0.00321428	-1.57835	0.000113982
Nudt16	-0.0655005	-0.706682	0.4994	7.30851	0.00322428	1.00892	2.64189e-07
Heg1	0.126517	0.706641	0.499342	8.26251	0.00322688	-1.51455	0.000386822
Gdnf	-0.078367	-0.706454	0.499077	4.90717	0.00323864	1.51023	3.42152e-06
Samd5	0.0786371	0.706238	0.498772	4.49791	0.00325226	-2.06173	5.01878e-07
Loxl2	0.0867168	0.706136	0.498628	7.94642	0.00325873	-1.15524	0.000145164
Lrrtm2	-0.0329697	-0.706128	0.498617	2.10834	0.00325924	1.90986	0.00230558
Zfp369	0.0883422	0.706023	0.498469	5.23887	0.00326585	-1.51915	0.00217776
Sufu	0.0917042	0.705963	0.498384	6.57089	0.0032697	-1.12217	0.00633946
Dcxr	-0.0739614	-0.705896	0.498289	7.23825	0.00327394	1.16678	2.93886e-08
BC021891	-0.0553545	-0.705822	0.498185	3.07842	0.00327862	2.21634	1.32172e-06
2310009B15Rik	-0.0696874	-0.705604	0.497877	7.04291	0.00329255	1.01097	3.05934e-05
Ldhal6b	0.0279213	0.705414	0.497609	2.21576	0.0033047	-1.6339	0.00524159
Hspb3	-0.074387	-0.705324	0.497481	8.7217	0.00331049	1.12064	1.57031e-08
Snhg3	-0.0812141	-0.705004	0.497031	7.34999	0.00333101	1.14917	2.34768e-05
Cdhr3	-0.0609975	-0.704661	0.496548	4.33507	0.00335315	1.29785	0.000104505
2310034G01Rik	-0.053676	-0.704304	0.496044	3.7131	0.00337636	1.42789	0.000129478
Apol9a	-0.0453231	-0.704074	0.49572	2.22675	0.00339138	2.08436	0.00497792
Ak4	-0.0639249	-0.703906	0.495484	6.11039	0.00340234	1.08134	1.24235e-07
Rhpn2	-0.0779268	-0.703888	0.495458	5.80939	0.00340356	1.2404	3.58766e-05
Kcnn4	-0.0573274	-0.703827	0.495372	4.24512	0.00340754	1.08411	0.0036661
Zbp1	-0.0804683	-0.703644	0.495115	3.98041	0.00341956	1.48231	0.00437954
Cpeb4	0.179606	0.703509	0.494925	9.653	0.00342846	-2.07033	0.00157024
Zbed6	0.148171	0.703307	0.494641	9.27833	0.0034418	-1.69262	0.00176632
Mthfd1l	-0.063675	-0.702825	0.493963	4.36623	0.00347377	1.06411	0.00792686
H2-K1	-0.0779683	-0.702239	0.49314	11.1677	0.00351299	1.07169	7.03373e-06
Spc24	-0.0620221	-0.702097	0.49294	5.29753	0.00352256	1.03017	0.000413886
Lama2	0.0727582	0.701997	0.4928	9.98088	0.00352927	-1.01018	1.00929e-06
3110021N24Rik	0.0729113	0.701763	0.492471	7.44599	0.00354512	-1.00185	8.02887e-05
Btbd7	0.117234	0.701395	0.491955	8.29926	0.00357007	-1.44059	0.000221669
Sertad1	-0.0772643	-0.701395	0.491954	7.19364	0.00357011	1.18785	6.24556e-07
Prokr1	0.0558847	0.700817	0.491145	3.9491	0.00360959	-1.74792	1.13596e-06
Grhl1	-0.0462231	-0.700674	0.490944	4.0855	0.00361945	1.01969	0.00144876
Eef1b2	-0.073733	-0.700613	0.490859	11.3063	0.00362363	1.04753	1.13596e-06
Gm14827	0.0370513	0.700083	0.490116	2.76185	0.00366033	-1.68315	0.000817263
Zbtb38	0.0910848	0.698834	0.488368	9.59299	0.00374789	-1.16479	3.14512e-05
Bicc1	0.0619426	0.69868	0.488154	7.08436	0.00375876	-1.06425	4.27928e-10
Ndst1	0.106847	0.698416	0.487785	10.6317	0.00377753	-1.16164	0.00108992
Sorcs1	0.0362211	0.698092	0.487333	3.93878	0.00380064	-1.01266	0.00135874
2310001K24Rik	-0.0338905	-0.697804	0.486931	2.63896	0.00382131	1.484	0.00208507
Ly6g6e	0.0497344	0.697735	0.486834	3.68841	0.00382626	-1.42281	0.00210969
Cbl	0.108677	0.697674	0.486749	6.43093	0.00383065	-1.67422	8.15388e-05
Spred2	0.112444	0.696846	0.485595	7.14093	0.00389065	-1.38713	0.00230971
4933439F18Rik	0.0788325	0.69678	0.485502	11.3117	0.00389548	-1.09934	1.25874e-07
Gale	-0.0487199	-0.696571	0.485211	3.80941	0.00391076	1.18481	0.00113663
Ccdc122	-0.0684869	-0.696318	0.484859	5.80713	0.0039293	1.17866	1.47628e-06
Nhlrc3	0.0676348	0.696161	0.48464	5.21628	0.00394089	-1.21898	0.000767695
2810008D09Rik	-0.0806822	-0.695521	0.48375	6.80888	0.00398821	1.27492	4.63896e-07
Lrp5	0.0870198	0.695519	0.483746	9.86923	0.00398838	-1.07659	0.000108315
Lyst	0.104394	0.695478	0.48369	6.77194	0.0039914	-1.39634	0.00106976
Pcdhga9	0.0340574	0.695472	0.483681	2.51851	0.00399186	-1.57844	0.00663471
Gdf11	0.0854266	0.695119	0.48319	6.86797	0.00401822	-1.08571	0.00279017
Mme	0.0794544	0.69506	0.483108	6.27589	0.00402261	-1.46113	3.45343e-10

## Sheet: eTableS11 6m vs. 28m VWR
gene_id	slope	R	intercept	pval	log2FoldChange	padj	|R|
Necab1	0.283095	0.791268	2.09049	0.000441745	-2.19518	0.00194689	0.791268		eTable S11 6m vs. 28m. All gene expression changes greater than or equal to + or - log2fc1 with padj<0.05, top 30 DEGs by |R|, from linear regression with VWR (voluntary wheel running) at pval<0.05
Rims4	-0.792035	-0.687733	8.10188	0.0046016	1.1028	0.00665736	0.687733
Tspan18	-0.474499	-0.681079	4.76685	0.00518302	1.21147	1.03998e-05	0.681079
Megf6	0.371054	0.669055	4.89514	0.00637978	-1.02055	0.000697181	0.669055
Plekhg1	0.480671	0.666175	5.97827	0.00669631	-1.12006	4.07742e-05	0.666175
Gck	0.335907	0.662461	4.77605	0.00712275	-1.05374	5.96642e-05	0.662461
Frem1	0.489382	0.662379	7.17846	0.00713245	-1.14073	6.29133e-11	0.662379
Zfp750	0.520657	0.649504	7.18578	0.00878007	-1.04843	8.30156e-05	0.649504
Sorcs1	0.326543	0.640934	4.28286	0.0100323	-1.21371	0.00013979	0.640934
Sacs	0.430057	0.637445	4.87403	0.0105804	-1.57142	1.11721e-09	0.637445
Akap12	0.25515	0.6339	4.02133	0.0111608	-1.01266	0.00135874	0.6339
B3gnt9-ps	0.50017	0.628262	4.9654	0.0121346	-1.59143	1.44785e-05	0.628262
Akap5	0.466814	0.615056	8.42629	0.0146741	-1.04817	5.09913e-09	0.615056
Atp2b4	0.370877	0.604124	5.56703	0.0170715	-1.05675	3.04631e-05	0.604124
Loxl2	0.387153	0.601783	4.99066	0.0176218	-1.00331	0.00540857	0.601783
Zbtb37	-0.25388	-0.600787	4.06403	0.0178602	1.01485	9.99275e-05	0.600787
Zfp382	-0.306935	-0.599759	3.99843	0.0181087	1.01969	0.00144876	0.599759
Tiam1	-0.304465	-0.595455	3.23689	0.0191779	1.49019	0.0001735	0.595455
Dchs1	-0.557677	-0.59535	5.83877	0.0192046	1.25363	0.000165843	0.59535
Daam2	0.469784	0.594503	8.7819	0.0194208	-1.1343	5.74437e-15	0.594503
Ston1	0.566297	0.594433	8.10046	0.0194389	-1.15524	0.000145164	0.594433
Pcdh12	0.370925	0.591953	4.63044	0.0200832	-1.06873	0.00780443	0.591953
Col4a3	-0.479876	-0.591646	7.12761	0.0201642	1.22717	3.13816e-13	0.591646
Ret	0.212517	0.591323	3.36416	0.0202495	-1.11518	0.00374125	0.591323
Col4a2	0.679305	0.590115	7.70031	0.0205713	-1.44876	3.13465e-05	0.590115
D630003M21Rik	0.549709	0.587727	7.53046	0.0212187	-1.05633	0.00106809	0.587727
P2ry1	0.455846	0.58758	7.66449	0.0212591	-1.06102	3.80974e-07	0.58758
Adra1a	-0.499617	-0.587458	10.1336	0.0212926	1.06251	1.12142e-05	0.587458
Nr4a3	0.68279	0.587267	6.46282	0.0213454	-1.76535	4.61902e-06	0.587267
Ptpn4	0.578134	0.581726	7.49536	0.0229146	-1.27333	2.34768e-05	0.581726

## Sheet: eTableS12 6m vs. 28m Grip
gene_id	slope	R	intercept	pval	log2FoldChange	padj	|R|
Tecpr2	0.377227	0.93739	9.11718	2.54622e-07	-1.07503	1.46414e-07	0.93739		eTable S12 6m vs. 28m. All gene expression changes greater than or equal to + or - log2fc1 with padj<0.05, top DEGs by |R| and |R|≥0.70, from linear regression with Grip Test at pval<0.05
3632451O06Rik	-0.381403	-0.935753	7.03304	2.99905e-07	1.14154	5.26409e-08	0.935753
Cyr61	-0.402058	-0.927579	9.96609	6.4031e-07	1.20679	8.86102e-15	0.927579
Gm14827	0.190759	0.924583	2.73937	8.27244e-07	-1.68315	0.000817263	0.924583
Golga7b	-0.385567	-0.918079	6.67217	1.39375e-06	1.20521	5.85019e-08	0.918079
Dpysl5	0.245005	0.90621	4.19683	3.26139e-06	-1.12242	0.00150951	0.90621
2210403K04Rik	-0.422314	-0.905404	9.60795	3.44102e-06	1.36167	8.16237e-24	0.905404
Otog	0.494499	0.894727	6.19069	6.71529e-06	-1.53312	0.000195135	0.894727
Aqp4	0.344044	0.890109	9.95467	8.77575e-06	-1.00661	1.78263e-08	0.890109
Hr	0.437964	0.887978	11.05	9.88992e-06	-1.25754	2.15652e-07	0.887978
Smad3	0.43369	0.883868	11.6304	1.23723e-05	-1.23391	8.55544e-07	0.883868
Ccdc104	-0.341931	-0.883414	7.73615	1.26759e-05	1.14823	4.74316e-15	0.883414
Zfp750	0.298072	0.879184	4.68518	1.58123e-05	-1.57142	1.11721e-09	0.879184
Bace1	0.353975	0.874229	10.3499	2.02794e-05	-1.00041	3.53597e-06	0.874229
Hipk2	0.680222	0.872994	9.68596	2.15429e-05	-2.01867	1.63036e-09	0.872994
Dopey2	0.370569	0.87043	9.63594	2.43742e-05	-1.11347	9.78717e-09	0.87043
Dagla	0.469607	0.866907	8.06702	2.87608e-05	-1.55593	1.38446e-13	0.866907
Btaf1	0.474219	0.865695	9.4646	3.04137e-05	-1.55249	2.00893e-18	0.865695
Myl4	-0.566916	-0.864522	8.10245	3.20879e-05	1.57247	1.77009e-05	0.864522
Zbtb16	0.434673	0.862835	10.5795	3.46282e-05	-1.09581	0.000402803	0.862835
Zfp180	0.344629	0.862256	8.96412	3.5537e-05	-1.05356	2.68917e-08	0.862256
Car3	-0.427061	-0.862215	16.083	3.56027e-05	1.32361	9.04454e-12	0.862215
Ncor2	0.41789	0.861089	11.693	3.74298e-05	-1.21925	3.30453e-08	0.861089
Fam65b	0.429624	0.854777	6.91536	4.91736e-05	-1.57577	3.45972e-12	0.854777
5330437I02Rik	0.425936	0.853705	5.95042	5.14436e-05	-1.48126	6.97879e-05	0.853705
Pogk	0.358844	0.851452	8.73637	5.64926e-05	-1.1407	1.05869e-09	0.851452
Slc23a3	-0.187418	-0.849951	2.54234	6.00777e-05	2.08122	0.000111461	0.849951
Lama3	0.371853	0.84778	5.50488	6.55956e-05	-1.57339	4.34796e-08	0.84778
Slc38a4	0.581562	0.847677	11.2195	6.58675e-05	-1.82077	2.95388e-11	0.847677
1700071M16Rik	0.382596	0.844837	3.66813	7.37393e-05	-2.55566	1.55143e-05	0.844837
Gm6307	0.330033	0.841479	9.1535	8.40307e-05	-1.0924	5.26305e-13	0.841479
Depdc7	-0.333152	-0.840923	6.09246	8.58421e-05	1.36182	4.9956e-20	0.840923
Spen	0.378065	0.840082	9.71359	8.86466e-05	-1.12633	3.94133e-07	0.840082
Ep300	0.392977	0.838532	10.6107	9.40119e-05	-1.17563	8.81816e-08	0.838532
Smox	0.532655	0.838268	12.8885	9.49492e-05	-1.63616	8.81043e-09	0.838268
Ier3	-0.341643	-0.8382	7.33129	9.51935e-05	1.22717	3.13816e-13	0.8382
1700001O22Rik	0.78413	0.834057	8.0229	0.000111018	-2.53669	6.18374e-06	0.834057
Zmiz2	0.391914	0.833898	10.8127	0.000111667	-1.13367	1.51013e-06	0.833898
Olfr920	-0.179945	-0.831054	3.04001	0.000123791	1.3152	0.00337735	0.831054
Fbxl22	-0.348509	-0.830925	6.92442	0.000124366	1.09652	2.01781e-05	0.830925
Mustn1	-0.491714	-0.830886	11.081	0.000124542	1.67559	1.52261e-16	0.830886
Prima1	0.478721	0.830574	5.34515	0.000125944	-1.87114	0.000233163	0.830574
Zfp366	0.608571	0.829238	5.80039	0.000132087	-2.47652	9.45232e-06	0.829238
Pcnx	0.362273	0.828902	11.676	0.000133673	-1.06933	5.8135e-07	0.828902
Amy1	-0.347971	-0.828891	10.2169	0.000133724	1.19282	4.52527e-16	0.828891
Marveld2	-0.295329	-0.827562	4.30786	0.000140144	1.43218	4.32734e-05	0.827562
Neto2	0.41386	0.82691	7.5643	0.000143385	-1.388	1.41042e-07	0.82691
Pdzd7	0.363657	0.826387	7.79207	0.000146028	-1.21177	1.13936e-08	0.826387
1700112E06Rik	-0.287765	-0.826089	5.20378	0.000147551	1.29701	8.81043e-09	0.826089
Ar	0.395297	0.82606	7.94653	0.000147702	-1.16146	5.4754e-05	0.82606
Wnt5b	-0.293643	-0.825713	6.09274	0.000149495	1.05373	1.44679e-06	0.825713
Pdzd2	0.414669	0.824939	9.46602	0.00015356	-1.2404	1.0009e-06	0.824939
5031439G07Rik	0.340703	0.822613	11.9801	0.000166319	-1.01679	5.85123e-07	0.822613
Chst11	0.43583	0.821966	6.46297	0.000170022	-1.50646	1.68287e-05	0.821966
4933439F18Rik	0.36165	0.819963	11.2294	0.000181912	-1.09934	1.25874e-07	0.819963
Pde4a	0.361993	0.819306	10.7235	0.000185954	-1.21079	3.3393e-14	0.819306
Rel	0.316234	0.818948	5.62376	0.000188193	-1.28042	2.70874e-06	0.818948
Grem2	0.606362	0.818378	6.25203	0.000191797	-2.44809	1.06004e-09	0.818378
Abl2	0.325166	0.817962	9.79769	0.000194462	-1.00895	1.70041e-07	0.817962
Kcng4	0.389495	0.816088	10.5501	0.000206852	-1.32708	2.33876e-16	0.816088
Foxn3	0.361548	0.81383	9.60821	0.000222627	-1.11549	2.86048e-07	0.81383
2310050B05Rik	-0.409041	-0.813682	9.07842	0.000223696	1.36988	1.62e-09	0.813682
Zfhx2	0.330525	0.812937	7.85168	0.000229136	-1.01379	1.82467e-05	0.812937
Fam78b	0.266185	0.81271	5.46898	0.000230816	-1.08989	2.27507e-05	0.81271
Dyrk2	0.42108	0.810346	9.58835	0.000248899	-1.28071	6.48887e-07	0.810346
Zfp532	0.309344	0.809885	8.81011	0.000252561	-1.00275	4.73607e-08	0.809885
9130404H23Rik	0.308161	0.808265	2.26526	0.000265765	-4.51201	3.34747e-05	0.808265
Iqsec1	0.37354	0.807635	11.0382	0.000271057	-1.13401	3.64182e-07	0.807635
Snph	0.4012	0.80691	5.44586	0.000277242	-1.63472	6.83178e-05	0.80691
E2f2	-0.335598	-0.804116	7.22277	0.000302195	1.07637	3.2033e-05	0.804116
Baiap3	-0.13967	-0.803985	2.5617	0.000303405	1.55882	0.00179046	0.803985
Mlxip	0.374593	0.803792	11.2138	0.000305205	-1.13716	5.06887e-07	0.803792
Zfp609	0.37913	0.803698	9.35803	0.00030608	-1.17495	5.8135e-07	0.803698
Usp24	0.371472	0.803147	12.1222	0.000311269	-1.07963	6.94689e-06	0.803147
Atp2b4	0.318457	0.801954	8.57005	0.00032274	-1.1343	5.74437e-15	0.801954
Fgd4	0.455558	0.801502	7.17722	0.00032717	-1.61221	1.7542e-08	0.801502
Rhoc	-0.296339	-0.801261	9.43415	0.000329561	1.03916	1.7088e-11	0.801261
Slc25a30	0.472909	0.79996	6.42803	0.000342684	-1.63179	7.30004e-05	0.79996
2310001K24Rik	-0.151459	-0.799954	2.67746	0.000342737	1.484	0.00208507	0.799954
C920006O11Rik	-0.239237	-0.799859	4.78079	0.000343713	1.05069	0.000122127	0.799859
Nos1	0.930781	0.799316	10.4816	0.000349329	-2.41179	0.000887102	0.799316
Fhl5	0.248213	0.799214	3.97394	0.000350395	-1.36767	0.00144862	0.799214
Best3	0.682506	0.798547	8.38137	0.000357408	-1.85274	0.00135874	0.798547
1700093K21Rik	-0.118986	-0.798124	2.33056	0.000361926	1.466	0.00524381	0.798124
Trip11	0.442927	0.79775	9.0503	0.000365947	-1.34488	2.32225e-06	0.79775
Bend5	-0.189323	-0.797491	3.63941	0.000368762	1.27902	0.000175538	0.797491
Dst	0.391627	0.796858	13.8736	0.000375701	-1.11453	1.87131e-05	0.796858
Kif3c	0.345753	0.796768	10.61	0.0003767	-1.0383	3.75768e-06	0.796768
Zfp652	0.531349	0.796663	9.53712	0.000377861	-1.56173	4.39572e-06	0.796663
Car1	-0.176754	-0.795555	3.69107	0.000390323	1.06092	0.00174218	0.795555
Lcor	0.414758	0.795012	6.01957	0.000396555	-1.56126	1.23196e-05	0.795012
Ccdc122	-0.304804	-0.794943	5.8859	0.000397351	1.17866	1.47628e-06	0.794943
Cdkl5	0.223711	0.794668	3.12255	0.000400535	-2.12491	2.87945e-05	0.794668
Lrp5	0.387517	0.794506	9.76932	0.000402427	-1.07659	0.000108315	0.794506
Asxl3	0.151017	0.793879	2.39373	0.000409815	-1.94508	0.000533172	0.793879
Fam5b	0.155022	0.791733	3.12177	0.000435921	-1.25155	0.00360211	0.791733
Pabpc1l	-0.148251	-0.791607	2.66753	0.000437494	1.52261	0.00160454	0.791607
Spnb2	0.326352	0.79139	12.0846	0.000440214	-1.0297	1.19519e-07	0.79139
Ptar1	0.261373	0.791355	5.50696	0.000440658	-1.15454	6.24556e-07	0.791355
Tmem8	-0.280255	-0.789927	5.63215	0.000458929	1.19805	5.28708e-08	0.789927
Lhfpl4	-0.16773	-0.789849	4.18192	0.000459936	1.01485	9.99275e-05	0.789849
Mmp15	0.322371	0.789803	9.32708	0.000460542	-1.06891	1.31391e-08	0.789803
Mrs2	0.421766	0.789622	8.87434	0.000462901	-1.27298	8.65709e-06	0.789622
Tnni1	-0.513681	-0.789411	6.26356	0.000465678	1.34319	0.00628848	0.789411
Cacng4	-0.173636	-0.789211	2.24448	0.000468307	2.62953	7.60809e-05	0.789211
Spns2	0.388634	0.788759	11.0068	0.000474321	-1.0685	0.000184742	0.788759
Inpp5j	0.352058	0.787511	6.85847	0.000491235	-1.20655	1.02592e-05	0.787511
Dclk3	0.138245	0.787473	3.78452	0.000491759	-1.02509	0.000675217	0.787473
BC068281	0.33427	0.787354	6.37862	0.000493396	-1.08403	0.000540355	0.787354
Gabrd	-0.185029	-0.787309	3.94143	0.000494025	1.20057	4.11624e-05	0.787309
Cdk19	0.350889	0.785058	10.032	0.000525923	-1.15111	1.48278e-08	0.785058
Pak1	-0.379942	-0.784611	9.2765	0.000532451	1.23399	6.24556e-07	0.784611
Mrgprh	0.3086	0.784484	6.13891	0.000534326	-1.22849	2.72349e-07	0.784484
Wnk2	0.391299	0.783976	11.6373	0.000541849	-1.04024	0.000329488	0.783976
Bmp8a	0.312906	0.78387	3.68023	0.000543417	-1.9525	0.00185583	0.78387
1700020I14Rik	0.518039	0.783663	11.4646	0.000546515	-1.55509	1.00929e-06	0.783663
Arhgap20	0.567128	0.783184	9.70675	0.000553748	-1.76844	2.06765e-07	0.783184
Gm5567	0.121423	0.78314	1.94459	0.000554413	-1.93044	0.00489289	0.78314
Arntl	0.449671	0.782665	8.6944	0.000561653	-1.36669	4.07742e-05	0.782665
Dnmt3a	0.329729	0.78262	10.7685	0.000562346	-1.16314	2.65824e-15	0.78262
Cyyr1	0.578528	0.782484	7.08325	0.000564439	-1.78824	0.00144724	0.782484
Npc1	0.43509	0.781791	11.0049	0.000575191	-1.17124	0.000255696	0.781791
Map3k13	0.369403	0.780983	5.03781	0.000587937	-1.50188	0.00180208	0.780983
Sgcd	0.396686	0.780623	8.70505	0.000593682	-1.2118	1.57232e-05	0.780623
Zdhhc5	0.345017	0.779692	11.5192	0.000608774	-1.03109	9.0807e-06	0.779692
Zyg11a	0.198034	0.779539	4.02536	0.000611282	-1.3292	1.50626e-05	0.779539
Uap1l1	-0.305486	-0.778687	7.23077	0.000625408	1.05926	4.57437e-06	0.778687
Zfyve26	0.335732	0.777783	9.00377	0.000640697	-1.00054	4.99601e-05	0.777783
Plekhg1	0.288151	0.776105	6.92383	0.000669853	-1.14073	6.29133e-11	0.776105
Caly	-0.199244	-0.775423	3.37976	0.000682008	1.49019	0.0001735	0.775423
Eif2c2	0.65778	0.775372	9.68139	0.000682924	-1.85436	0.000398328	0.775372
Ttll4	0.460072	0.773093	7.55517	0.000724911	-1.41399	8.98078e-05	0.773093
Man1a	0.294496	0.772594	8.01043	0.000734381	-1.03017	2.50421e-07	0.772594
4831426I19Rik	0.393048	0.77244	6.12308	0.00073732	-1.57552	6.24556e-07	0.77244
Atp2b3	0.398727	0.772157	8.18363	0.000742753	-1.08498	0.0011209	0.772157
Tspo	-0.333475	-0.771354	8.71926	0.000758331	1.13064	6.52387e-07	0.771354
Rab11fip3	0.340237	0.770583	11.5751	0.000773555	-1.00434	2.78762e-05	0.770583
C3	0.373196	0.770366	10.6364	0.000777878	-1.13368	2.46447e-05	0.770366
Zhx3	0.413429	0.769864	7.64808	0.000787956	-1.31497	2.82401e-05	0.769864
Ift27	-0.305664	-0.769548	7.39946	0.000794355	1.02148	3.4845e-05	0.769548
Asl	-0.282016	-0.769334	7.06737	0.000798724	1.10301	4.04956e-10	0.769334
Crybg3	0.380628	0.769292	9.82561	0.000799583	-1.13134	2.54433e-05	0.769292
Slc25a36	0.38767	0.768684	8.69255	0.000812068	-1.27844	6.33454e-07	0.768684
Cbl	0.466628	0.768421	6.29266	0.000817533	-1.67422	8.15388e-05	0.768421
Gstm2	-0.329161	-0.768053	9.78368	0.00082522	1.1977	1.60152e-13	0.768053
Tnnt2	-0.39899	-0.767535	6.65082	0.00083614	1.2925	0.000165096	0.767535
Rbm3	-0.372223	-0.76734	9.89485	0.00084027	1.35511	1.1783e-12	0.76734
Itga1	0.369495	0.767301	8.18514	0.000841103	-1.21499	2.16593e-06	0.767301
Mdfi	-0.41675	-0.767073	5.25323	0.000845956	1.32822	0.00578062	0.767073
Cpeb4	0.763296	0.766933	9.41836	0.000848956	-2.07033	0.00157024	0.766933
Cxcl10	-0.467132	-0.766815	4.58588	0.000851495	2.6054	1.89818e-11	0.766815
Heatr5b	0.323289	0.766022	8.06329	0.000868688	-1.00045	7.04805e-05	0.766022
BC021891	-0.233949	-0.765206	3.15174	0.000886666	2.21634	1.32172e-06	0.765206
Psd3	0.335605	0.764997	9.65272	0.000891331	-1.11873	6.33541e-08	0.764997
Slfn3	0.221097	0.764681	3.74337	0.000898393	-1.5193	0.000334301	0.764681
Nt5c	-0.280426	-0.764043	6.56778	0.000912826	1.06668	2.43127e-06	0.764043
D330050I16Rik	-0.228881	-0.763972	3.71232	0.000914442	1.44691	0.000256752	0.763972
Lamc3	0.212537	0.763965	4.4231	0.000914583	-1.27495	2.32545e-05	0.763965
Kdr	0.384848	0.763259	10.3898	0.000930788	-1.27986	1.54964e-08	0.763259
Tmsb15b1	-0.137959	-0.762878	2.76946	0.000939626	1.22959	0.00857129	0.762878
Arl5b	0.505324	0.762196	7.44008	0.000955635	-1.57835	0.000113982	0.762196
Mfap3l	0.275955	0.761689	7.64999	0.000967662	-1.08915	2.26987e-15	0.761689
Ankrd1	-0.708006	-0.761554	9.87819	0.000970878	2.68099	1.03048e-17	0.761554
3110021N24Rik	0.308418	0.761466	7.34961	0.000972987	-1.00185	8.02887e-05	0.761466
Pde3a	0.350064	0.761433	5.10812	0.00097377	-1.68212	1.1795e-05	0.761433
2610002J02Rik	-0.293456	-0.760105	5.81728	0.00100604	1.22944	4.06533e-07	0.760105
Bmpr2	0.633718	0.759007	9.13694	0.00103335	-1.76329	0.00113728	0.759007
2210009G21Rik	0.355069	0.758596	5.42699	0.00104372	-1.32486	0.00288228	0.758596
Cacna1c	0.333296	0.758404	6.00694	0.00104862	-1.29007	3.37513e-05	0.758404
9930111J21Rik1	0.199586	0.757993	3.5019	0.00105912	-1.71146	9.0807e-06	0.757993
Irs2	0.546513	0.757848	8.34969	0.00106285	-1.5143	0.000571417	0.757848
Tbcb	-0.281741	-0.756927	9.13446	0.00108675	1.00553	4.73546e-08	0.756927
Erc2	-0.575898	-0.756595	4.63636	0.00109548	3.54275	4.92333e-20	0.756595
Nptxr	0.0946382	0.756051	1.44922	0.0011099	-2.34379	0.00282855	0.756051
Celf4	-0.197623	-0.756001	3.54398	0.00111122	1.37857	0.000325513	0.756001
Btbd7	0.492498	0.755839	8.14164	0.00111555	-1.44059	0.000221669	0.755839
Hivep1	0.333542	0.755536	9.24602	0.00112368	-1.06291	5.85611e-06	0.755536
Gstm7	-0.305873	-0.755115	5.54604	0.00113508	1.34045	4.63896e-07	0.755115
Ifit3	-0.336993	-0.75496	6.19189	0.00113929	1.0571	0.0019037	0.75496
Gm15800	0.351504	0.754939	9.57962	0.00113986	-1.07636	2.61143e-05	0.754939
Usp34	0.439516	0.754666	10.5873	0.00114731	-1.24969	0.000113363	0.754666
1700101I11Rik	-0.140694	-0.754576	2.45087	0.00114976	2.209	3.82282e-05	0.754576
Hes6	-0.315145	-0.754478	7.52351	0.00115247	1.09808	1.30592e-05	0.754478
D830031N03Rik	0.548453	0.753645	7.15714	0.00117552	-1.67512	0.000473089	0.753645
Nradd	-0.203725	-0.753607	4.73927	0.00117658	1.03734	4.03782e-05	0.753607
Tnnt1	-0.363199	-0.753564	6.91072	0.0011778	1.01559	0.00429233	0.753564
Hspb3	-0.30979	-0.753483	8.82382	0.00118005	1.12064	1.57031e-08	0.753483
Wdfy3	0.348337	0.753266	10.0733	0.00118614	-1.05659	3.15343e-05	0.753266
Snhg1	-0.277697	-0.752453	6.76165	0.0012092	1.08821	1.2849e-07	0.752453
Ak4	-0.266318	-0.752245	6.19807	0.00121512	1.08134	1.24235e-07	0.752245
Abca2	0.385671	0.752001	9.84222	0.00122216	-1.15103	4.79068e-05	0.752001
Zfp382	0.135796	0.751897	3.26189	0.00122516	-1.11518	0.00374125	0.751897
Tcap	-0.315178	-0.751837	16.0096	0.00122689	1.08463	1.04214e-07	0.751837
Mtr	0.360453	0.751185	8.79989	0.00124584	-1.06683	0.000183387	0.751185
Ssh1	0.367778	0.750956	6.48409	0.00125256	-1.35834	1.64728e-05	0.750956
1110002L01Rik	0.276879	0.750882	5.2024	0.00125474	-1.13104	0.00125316	0.750882
Uchl1	-0.587006	-0.750302	6.72854	0.0012719	2.22249	3.30758e-07	0.750302
Gm16982	0.103067	0.750139	1.40063	0.00127674	-2.2838	0.0069264	0.750139
Nr4a3	0.636355	0.749411	5.89593	0.00129862	-2.19262	0.008721	0.749411
Thrsp	-0.369839	-0.749169	7.96609	0.00130594	1.06718	0.00120221	0.749169
Fgf6	0.298973	0.749158	5.22339	0.00130628	-1.33294	9.17534e-05	0.749158
Phc1	0.359226	0.749043	9.04402	0.00130979	-1.20802	3.01103e-07	0.749043
Lhx6	0.250282	0.749011	5.50092	0.00131078	-1.06503	6.19154e-05	0.749011
Tnnc1	-0.329212	-0.748866	5.92124	0.00131518	1.17482	0.00028086	0.748866
Snhg11	-0.270275	-0.748699	4.45558	0.00132031	1.48803	2.14664e-06	0.748699
Leprel1	0.297285	0.748659	4.72434	0.00132154	-1.40317	0.00148199	0.748659
Zbed6	0.61476	0.74852	9.07312	0.00132581	-1.69262	0.00176632	0.74852
Grlf1	0.378565	0.748427	10.2365	0.00132866	-1.13656	4.13151e-05	0.748427
Arhgap5	0.360941	0.748237	10.1871	0.00133454	-1.07432	6.53192e-05	0.748237
1190005I06Rik	-0.20305	-0.748231	3.94391	0.00133472	1.10302	0.00224928	0.748231
Gm5105	0.531441	0.747674	7.66252	0.00135205	-1.93046	2.68917e-08	0.747674
H2afj	-0.291113	-0.747669	8.31908	0.00135218	1.06318	4.97642e-08	0.747669
Vwa3a	0.230094	0.747135	4.67569	0.00136896	-1.18408	0.000132227	0.747135
Ctxn3	-0.357797	-0.746863	9.77018	0.00137757	1.27295	3.44813e-08	0.746863
Dennd4c	0.448595	0.745176	9.60511	0.00143196	-1.29161	0.000148482	0.745176
St3gal1	0.313744	0.744938	8.94523	0.00143976	-1.08693	3.63491e-07	0.744938
Gna12	0.404043	0.744717	8.82821	0.00144703	-1.22157	7.59499e-05	0.744717
Hspg2	0.453592	0.744582	12.2913	0.00145149	-1.49165	5.85019e-08	0.744582
Nme4	-0.3104	-0.744446	5.36832	0.00145598	1.47153	2.68917e-08	0.744446
Ppp1r12b	0.648808	0.744335	10.8496	0.00145968	-1.57532	0.00762544	0.744335
Dock3	-0.126958	-0.743486	2.60697	0.00148814	1.5679	0.000999397	0.743486
Fhit	-0.259652	-0.742558	4.01311	0.00151975	1.4881	0.000164983	0.742558
9830001H06Rik	0.324976	0.741849	7.97666	0.00154424	-1.15326	2.41731e-07	0.741849
Gm4841	-0.6322	-0.741825	7.5392	0.00154507	2.07813	0.000237008	0.741825
Ston1	0.433397	0.741781	6.13198	0.00154659	-1.76535	4.61902e-06	0.741781
Gm16576	0.344306	0.74161	7.75193	0.00155256	-1.02133	0.000824333	0.74161
Myl12a	-0.375396	-0.741217	12.2404	0.00156635	1.38868	4.00047e-10	0.741217
Fam38a	0.511966	0.740966	8.71246	0.00157522	-1.44752	0.000480183	0.740966
Megf6	0.188673	0.740446	4.59419	0.00159369	-1.05374	5.96642e-05	0.740446
4833403I15Rik	0.344435	0.740321	5.57404	0.00159812	-1.35216	0.000702999	0.740321
Nt5c1a	0.649799	0.738143	7.74539	0.00167756	-1.86485	0.00560484	0.738143
Cth	-0.247914	-0.738143	5.73574	0.00167759	1.03729	4.57437e-06	0.738143
Cyp2u1	0.301132	0.737306	6.71432	0.00170893	-1.02604	0.0003078	0.737306
H2-T10	-0.213023	-0.737233	4.10265	0.00171169	1.03751	0.00532948	0.737233
Gins1	-0.204663	-0.736444	4.96452	0.0017417	1.04563	9.48171e-06	0.736444
Rasd1	-0.237865	-0.736434	4.3516	0.00174209	1.1555	0.00117322	0.736434
Slc6a2	0.194708	0.735609	3.77643	0.00177397	-1.37206	0.000297953	0.735609
Ebf2	0.322389	0.73546	6.14645	0.00177978	-1.407	1.21794e-08	0.73546
Raver2	0.34095	0.734854	7.82749	0.00180352	-1.23875	1.49458e-07	0.734854
Gatad2b	0.459822	0.734395	8.02218	0.00182169	-1.29664	0.00117855	0.734395
Xylt1	0.396373	0.734086	5.25997	0.001834	-1.81862	0.000106546	0.734086
Notch3	0.327469	0.733984	9.7227	0.00183808	-1.03029	2.80001e-05	0.733984
Trappc6a	-0.403131	-0.733312	5.67952	0.00186512	1.65015	7.3611e-06	0.733312
Mt3	-0.58753	-0.733269	5.27431	0.00186688	2.93223	1.28309e-12	0.733269
4930578C19Rik	0.32808	0.73316	5.41407	0.00187131	-1.31164	0.00111839	0.73316
2310034G01Rik	-0.217816	-0.733136	3.79124	0.00187228	1.42789	0.000129478	0.733136
Gpr17	0.360026	0.733119	5.33148	0.00187294	-1.51699	0.000733146	0.733119
Zbtb38	0.372457	0.733025	9.4626	0.00187679	-1.16479	3.14512e-05	0.733025
Atp5l	-0.271463	-0.732059	8.11606	0.00191644	1.01661	1.60611e-07	0.732059
4933415F23Rik	-0.61067	-0.731604	5.00113	0.00193532	2.94719	5.85019e-08	0.731604
Heg1	0.510601	0.731555	8.07615	0.00193739	-1.51455	0.000386822	0.731555
Mbd5	0.412877	0.730633	8.42583	0.00197617	-1.29544	6.01485e-05	0.730633
Slc17a8	-0.119339	-0.730455	1.49768	0.00198375	2.83634	0.00211554	0.730455
Adcy9	0.685742	0.729692	9.72548	0.00201641	-1.77748	0.0055486	0.729692
Auts2	0.394059	0.729149	8.61564	0.00203996	-1.36441	6.63145e-07	0.729149
Mast4	0.375519	0.729061	10.2829	0.0020438	-1.148	5.41686e-05	0.729061
2810008D09Rik	-0.329335	-0.728259	6.92483	0.00207897	1.27492	4.63896e-07	0.728259
Vps13c	0.551371	0.728252	9.95771	0.00207927	-1.40004	0.00751569	0.728252
Sik2	0.546152	0.727982	7.5159	0.00209127	-1.53686	0.0097786	0.727982
Mme	0.324392	0.727931	6.16176	0.0020935	-1.46113	3.45343e-10	0.727931
Ret	0.310409	0.727818	6.53542	0.00209852	-1.32138	1.57462e-09	0.727818
Tecta	0.203795	0.727801	4.33512	0.00209928	-1.03977	0.00376998	0.727801
1700012D01Rik	-0.179515	-0.72765	3.50857	0.00210604	1.26394	0.00109317	0.72765
Nwd1	0.29731	0.72754	5.69896	0.00211094	-1.01952	0.00610023	0.72754
Ctla2b	-0.259594	-0.727519	5.60693	0.00211188	1.0555	8.83482e-05	0.727519
Mpv17l	-0.179349	-0.727503	4.0633	0.00211259	1.05722	0.000891785	0.727503
Itga4	0.39659	0.72708	8.81089	0.0021316	-1.12497	0.000912604	0.72708
Pomp	-0.284795	-0.72694	10.6497	0.00213789	1.0263	1.32264e-07	0.72694
Zfp493	0.235251	0.726846	5.78146	0.00214217	-1.02045	1.41986e-05	0.726846
Lhfpl3	-0.0956509	-0.726755	1.63091	0.00214628	2.14642	0.00387266	0.726755
H2-K1	-0.314531	-0.726684	11.2827	0.00214949	1.07169	7.03373e-06	0.726684
Psmg4	-0.32655	-0.72659	6.77461	0.0021538	1.33233	1.21794e-08	0.72659
1700011I03Rik	-0.266484	-0.726487	3.4581	0.00215848	2.11628	5.5415e-06	0.726487
Spint2	-0.326756	-0.726294	6.63169	0.00216728	1.43636	3.42069e-14	0.726294
Palld	0.403017	0.72627	9.58909	0.00216836	-1.1726	0.000273543	0.72627
Hmbox1	0.474092	0.726241	6.71426	0.00216971	-1.72946	3.34172e-05	0.726241
Atf7	0.479968	0.725899	7.16372	0.00218536	-1.57582	0.000192914	0.725899
Huwe1	0.366364	0.725501	12.4178	0.00220375	-1.03379	0.000465616	0.725501
Slc36a4	0.280921	0.725302	4.34636	0.00221298	-1.54161	0.0035918	0.725302
Vps13d	0.475971	0.724205	10.7849	0.00226439	-1.31143	0.000530017	0.724205
2410066E13Rik	0.318791	0.723656	5.9775	0.00229052	-1.193	0.000573855	0.723656
Tmem229a	0.124526	0.723393	2.99819	0.00230309	-1.30432	0.00150117	0.723393
Pcdhgb6	0.333482	0.72325	5.1223	0.00230994	-1.51308	0.000822075	0.72325
Gck	0.291288	0.723095	6.90299	0.00231742	-1.04843	8.30156e-05	0.723095
Pcbd1	-0.215712	-0.723074	2.97602	0.00231845	1.6765	0.00740404	0.723074
2810032G03Rik	-0.258829	-0.722306	3.74186	0.00235571	1.75653	3.74707e-05	0.722306
Heatr5a	0.289498	0.722248	9.50854	0.00235853	-1.00062	6.66117e-07	0.722248
Impad1	0.370886	0.721914	11.0219	0.00237488	-1.05384	0.000471513	0.721914
Il1r1	0.316717	0.7216	7.98343	0.00239037	-1.09104	8.11082e-05	0.7216
Gm7609	-0.0826661	-0.721347	0.817344	0.00240294	3.26632	0.00267098	0.721347
1110018J18Rik	0.345614	0.721311	8.3092	0.00240471	-1.05356	0.0003491	0.721311
Lynx1	0.310452	0.721217	11.9086	0.00240939	-1.05245	5.13423e-07	0.721217
E230016M11Rik	-0.159851	-0.721083	3.7328	0.00241603	1.05834	0.00163881	0.721083
Pggt1b	0.422649	0.72103	7.68094	0.00241868	-1.37962	9.07691e-05	0.72103
Ttll7	0.452746	0.72044	12.2598	0.00244824	-1.21265	0.00106196	0.72044
Dbndd1	0.347356	0.72028	5.43452	0.00245635	-1.34414	0.00505537	0.72028
Rpl3	-0.329619	-0.720103	9.8864	0.00246527	1.30029	1.5693e-07	0.720103
Arhgdig	-0.447699	-0.719819	4.34548	0.00247972	2.62652	3.30453e-08	0.719819
Evi5l	0.454596	0.719496	7.2735	0.00249617	-1.3111	0.00342937	0.719496
Tesc	-0.22223	-0.719324	3.82383	0.00250499	1.35333	0.000791459	0.719324
Cdkn2a	-0.265823	-0.718879	2.74453	0.00252791	2.32248	0.00186124	0.718879
Cdkn1a	-0.575364	-0.717858	8.5633	0.0025811	2.20663	1.05085e-08	0.717858
AI506816	0.312383	0.716766	4.79596	0.002639	-1.3803	0.00835398	0.716766
Nudt16	-0.258821	-0.716299	7.4093	0.00266408	1.00892	2.64189e-07	0.716299
Rybp	0.276266	0.716059	5.69224	0.00267705	-1.00401	0.00390481	0.716059
Romo1	-0.27572	-0.715909	10.4004	0.00268515	1.01523	1.13768e-07	0.715909
Sned1	0.405342	0.715346	6.28916	0.00271587	-1.37068	0.00187074	0.715346
Lgi2	0.291548	0.714546	4.49377	0.00275993	-1.99734	5.84426e-11	0.714546
2410137F16Rik	-0.497614	-0.714432	5.7962	0.00276624	2.3363	1.75564e-10	0.714432
C130083M11Rik	0.356707	0.713706	6.0714	0.0028068	-1.19275	0.0050971	0.713706
Has3	0.325706	0.713289	6.07853	0.0028303	-1.28824	0.000111991	0.713289
Gdnf	-0.308346	-0.713023	5.02878	0.0028454	1.51023	3.42152e-06	0.713023
Sln	-1.031	-0.712601	6.89641	0.00286947	4.32713	1.08185e-06	0.712601
Fam196b	-0.21511	-0.712454	4.55059	0.00287785	1.21065	1.1425e-05	0.712454
LOC100504703	-0.276053	-0.712449	4.30413	0.00287817	1.58567	1.61093e-05	0.712449
Atpif1	-0.286605	-0.711986	8.47803	0.00290479	1.03958	4.14799e-06	0.711986
Nup98	0.385637	0.711933	8.46368	0.00290784	-1.05461	0.00294504	0.711933
Dcxr	-0.290403	-0.710972	7.3535	0.00296386	1.16678	2.93886e-08	0.710972
Tbck	0.442726	0.709923	6.98912	0.00302592	-1.37859	0.00194864	0.709923
Col4a4	0.245656	0.709864	5.17261	0.00302946	-1.36543	1.32426e-09	0.709864
Gdap10	0.379403	0.709708	5.45253	0.00303876	-1.58159	0.000901215	0.709708
Gpr132	-0.159476	-0.709446	3.31831	0.00305447	1.10495	0.00959599	0.709446
H2-Q4	-0.301896	-0.709157	9.0311	0.00307192	1.01925	0.000376865	0.709157
Uhmk1	0.418335	0.709028	6.69392	0.00307967	-1.34332	0.00218536	0.709028
Lyst	0.414785	0.70884	6.61308	0.00309111	-1.39634	0.00106976	0.70884
Ankrd52	0.512609	0.708687	10.673	0.00310038	-1.37818	0.00106879	0.708687
Psmb4	-0.275945	-0.707752	11.7099	0.00315771	1.0168	1.75741e-07	0.707752
Rpl13a	-0.3092	-0.707579	12.4958	0.00316837	1.14491	8.76255e-08	0.707579
Gpld1	0.447951	0.707226	9.1996	0.00319029	-1.25942	0.000998752	0.707226
Rassf8	0.47413	0.707088	7.67881	0.00319893	-1.41437	0.00134834	0.707088
Wdfy2	0.38803	0.706571	6.10679	0.00323125	-1.44961	0.00050841	0.706571
Fam46c	0.217751	0.706225	4.15198	0.00325309	-1.36432	0.000335443	0.706225
Scn4a	0.410463	0.705993	13.6868	0.00326777	-1.10881	0.00140403	0.705993
1700029F09Rik	-0.228958	-0.705734	5.91458	0.00328423	1.0167	4.01018e-06	0.705734
Prdm10	0.354027	0.703836	5.3824	0.00340693	-1.4049	0.0048083	0.703836
Akap12	0.268135	0.703017	8.17817	0.00346104	-1.04817	5.09913e-09	0.703017
Map1lc3a	-0.284013	-0.702321	12.39	0.00350745	1.04273	1.50808e-07	0.702321
P2ry1	0.266367	0.702205	7.97528	0.00351526	-1.07609	1.99738e-10	0.702205
Tspan18	0.254572	0.702092	5.70603	0.00352287	-1.12006	4.07742e-05	0.702092
Snx29	0.316051	0.702063	6.1873	0.00352485	-1.16738	0.000633543	0.702063
Eif4ebp2	0.529112	0.702054	10.774	0.00352543	-1.34905	0.00983963	0.702054
Sertad1	-0.301154	-0.701273	7.31577	0.0035784	1.18785	6.24556e-07	0.701273
Pcsk6	0.343277	0.701165	8.25296	0.00358575	-1.45049	2.35438e-19	0.701165
Rps19-ps3	-0.187671	-0.700877	3.34828	0.00360547	1.33	0.00358407	0.700877
Tead4	0.450199	0.700703	7.62971	0.00361741	-1.19811	0.00893762	0.700703
Prap1	0.124196	0.700541	1.8963	0.00362858	-2.51258	0.000480183	0.700541
Etohi1	0.395927	0.700528	8.3822	0.00362953	-1.16268	0.00112209	0.700528
Sipa1l3	0.27597	0.700256	7.18735	0.0036483	-1.01853	2.53199e-05	0.700256
Sec14l5	0.583856	0.700109	8.29645	0.00365851	-1.90239	0.000416436	0.700109
Bahcc1	0.328672	0.700094	7.89039	0.00365954	-1.1592	1.43219e-05	0.700094
Cacna2d4	0.379125	0.699657	8.41336	0.00368996	-1.43511	9.73309e-09	0.699657
Nbeal1	0.403504	0.699027	8.7849	0.00373422	-1.20831	0.000590032	0.699027
Creb5	0.179854	0.698503	4.11487	0.00377134	-1.15945	0.000481768	0.698503
Zfp398	0.303954	0.698287	6.26362	0.00378674	-1.13942	0.000368759	0.698287
Fat4	0.347886	0.697592	7.57794	0.00383656	-1.38248	1.21794e-08	0.697592
5930438M14	-0.234734	-0.696893	3.26982	0.00388726	1.65241	0.00410308	0.696893
Trpm3	0.188015	0.696604	4.02188	0.00390835	-1.36327	2.78762e-05	0.696604
Fbxl18	0.397064	0.695193	6.6157	0.00401264	-1.28307	0.00308305	0.695193

## Sheet: eTableS13 6m vs. 28m Cling
gene_id	slope	R	intercept	pval	log2FoldChange	padj	|R|
P2ry1	0.151708	0.911941	7.9321	2.19573e-06	-1.07609	1.99738e-10	0.911941		eTable S13 6m vs. 28m. All gene expression changes greater than or equal to + or - log2fc1 with padj<0.05, top 30 DEGs by |R|, from linear regression with Inverted Cling at pval<0.05
Grm1	0.125269	0.891175	4.85695	8.2588e-06	-1.03563	0.00235596	0.891175
Lynx1	0.167291	0.886174	11.8479	1.09225e-05	-1.05245	5.13423e-07	0.886174
Slc10a6	-0.141076	-0.88429	5.32261	1.20958e-05	1.03568	0.00120221	0.88429
BC051142	-0.106735	-0.868568	2.68199	2.66176e-05	2.46217	2.77004e-05	0.868568
Kdr	0.191637	0.866637	10.2976	2.91221e-05	-1.27986	1.54964e-08	0.866637
Rtn4rl2	-0.110234	-0.85738	3.81898	4.40084e-05	1.22551	0.00272311	0.85738
Pcdh12	0.187209	0.854737	7.13216	4.92567e-05	-1.27333	2.34768e-05	0.854737
Wnt5a	0.143288	0.853992	6.56335	5.08278e-05	-1.04301	3.1841e-05	0.853992
Erc2	-0.281831	-0.84427	4.77968	7.53982e-05	3.54275	4.92333e-20	0.84427
Nr1d1	0.156511	0.828523	12.129	0.000135476	-1.00714	7.35941e-06	0.828523
Ppp1r1a	-0.225912	-0.823936	9.6332	0.000158961	1.59812	2.32225e-06	0.823936
2010300C02Rik	-0.1654	-0.822053	5.50271	0.00016952	1.57252	1.01892e-07	0.822053
Zfp385b	0.194344	0.821644	7.66529	0.000171892	-1.02822	0.00785917	0.821644
Vwa3a	0.110772	0.820162	4.61645	0.000180697	-1.18408	0.000132227	0.820162
Col15a1	0.232567	0.814497	9.30886	0.000217868	-1.3074	0.00112586	0.814497
Pde4a	0.157238	0.811481	10.6119	0.000240078	-1.21079	3.3393e-14	0.811481
Glul	-0.170948	-0.80925	12.0404	0.000257667	1.17096	1.12038e-05	0.80925
Zyg11a	0.0899953	0.807781	3.96859	0.000269822	-1.3292	1.50626e-05	0.807781
Nr5a2	0.0759673	0.806979	2.64309	0.000276655	-1.7282	0.00197692	0.806979
Frem1	0.0903386	0.804568	4.06105	0.000298038	-1.21371	0.00013979	0.804568
Kcnn4	-0.111825	-0.803033	4.38865	0.000312351	1.08411	0.0036661	0.803033
Ier3	-0.142938	-0.799644	7.44256	0.000345933	1.22717	3.13816e-13	0.799644
Rhpn2	-0.151224	-0.798961	6.00535	0.00035304	1.2404	3.58766e-05	0.798961
Papln	0.197938	0.798661	5.09979	0.000356203	-1.74154	0.0015548	0.798661
Rbm3	-0.169437	-0.796468	10.0012	0.000380024	1.35511	1.1783e-12	0.796468
Caly	-0.0896838	-0.795869	3.4378	0.000386753	1.49019	0.0001735	0.795869
Ror1	0.139439	0.791878	3.99085	0.000434106	-1.85331	0.000984311	0.791878
Akap5	0.111897	0.789213	4.73286	0.000468291	-1.00331	0.00540857	0.789213
Zfp750	0.117313	0.789004	4.5801	0.000471058	-1.57142	1.11721e-09	0.789004
Nppb	-0.0409385	-0.788218	0.641168	0.0004816	3.55059	0.00293448	0.788218
Ctxn3	-0.165257	-0.786572	9.86988	0.000504291	1.27295	3.44813e-08	0.786572
Lgals3	-0.270632	-0.785703	7.52323	0.000516611	2.06212	0.000171906	0.785703
Spint2	-0.154957	-0.78537	6.71836	0.000521405	1.43636	3.42069e-14	0.78537
E030010A14Rik	-0.128109	-0.784873	4.65132	0.00052862	1.43973	1.16999e-05	0.784873
Cyp1a1	-0.12038	-0.784027	5.10095	0.000541088	1.21147	1.03998e-05	0.784027
Slpi	-0.105679	-0.781008	2.21889	0.000587544	2.35054	0.00726019	0.781008
Gnmt	-0.138451	-0.77793	4.71783	0.000638179	1.60698	8.244e-07	0.77793
Snhg1	-0.125781	-0.777134	6.84171	0.000651841	1.08821	1.2849e-07	0.777134
Fxyd7	-0.107779	-0.774928	4.43918	0.000690952	1.11105	0.00180031	0.774928
Amica1	-0.0606622	-0.774279	2.86222	0.000702814	1.20852	0.00785917	0.774279
Mfap3l	0.122993	0.774095	7.56827	0.000706202	-1.08915	2.26987e-15	0.774095
Dclk3	0.0594883	0.772666	3.74128	0.000732995	-1.02509	0.000675217	0.772666
Msln	-0.155866	-0.771418	3.91983	0.000757077	1.9269	0.000187899	0.771418
Myh10	0.165781	0.76941	8.93761	0.000797159	-1.13857	3.05934e-05	0.76941
Raver2	0.156412	0.768698	7.73134	0.000811794	-1.23875	1.49458e-07	0.768698
Col4a2	0.186986	0.767365	11.2349	0.000839741	-1.28698	7.52616e-06	0.767365
Lhfpl4	-0.0713444	-0.766069	4.23529	0.000867656	1.01485	9.99275e-05	0.766069
A530013C23Rik	-0.125468	-0.765638	6.30009	0.000877113	1.11728	3.75768e-06	0.765638
Ifit1	-0.158034	-0.765522	6.21352	0.000879672	1.25363	0.000165843	0.765522
Col4a1	0.181497	0.762969	11.5739	0.000937527	-1.23453	2.78762e-05	0.762969
Col4a3	0.112343	0.76274	5.6427	0.00094284	-1.08141	7.96159e-06	0.76274
Tecta	0.093661	0.7627	4.27783	0.000943791	-1.03977	0.00376998	0.7627
Dnmt3a	0.140918	0.762667	10.6643	0.000944559	-1.16314	2.65824e-15	0.762667
Cebpd	-0.193233	-0.76133	8.6679	0.000976255	1.1028	0.00665736	0.76133
Fbxo48	0.0384982	0.757813	1.20895	0.00106374	-2.57941	0.00298057	0.757813
Cacna2d4	0.1788	0.752391	8.31172	0.00121095	-1.43511	9.73309e-09	0.752391
Gm5105	0.234329	0.751722	7.5024	0.00123022	-1.93046	2.68917e-08	0.751722
Plekhg1	0.122279	0.750977	6.83184	0.00125193	-1.14073	6.29133e-11	0.750977
8430408G22Rik	-0.167237	-0.749291	7.21392	0.00130225	1.29431	3.72159e-05	0.749291
Ddit4	-0.148239	-0.747544	8.15056	0.00135611	1.08988	4.89323e-05	0.747544
Tspan18	0.118825	0.747248	5.63645	0.0013654	-1.12006	4.07742e-05	0.747248
Heatr5a	0.131237	0.746573	9.4252	0.0013868	-1.00062	6.66117e-07	0.746573
Inpp5j	0.146352	0.746474	6.74279	0.00138996	-1.20655	1.02592e-05	0.746474
Cdt1	-0.106101	-0.742376	4.02012	0.001526	1.32189	0.00098329	0.742376
Ccdc8	0.0906928	0.739071	4.04665	0.00164335	-1.49547	5.51289e-07	0.739071
Cit	0.0947037	0.738743	3.94737	0.00165538	-1.34264	0.000602357	0.738743
Mmp15	0.131993	0.737375	9.21897	0.00170633	-1.06891	1.31391e-08	0.737375
Gm4013	-0.056206	-0.736767	2.86231	0.00172939	1.38909	0.00148081	0.736767
2700086A05Rik	0.0569814	0.736621	2.1032	0.00173494	-2.31108	0.000153004	0.736621
Prkcz	-0.190947	-0.735909	6.15743	0.00176234	1.87178	3.31045e-09	0.735909
Rgs9bp	0.121871	0.734584	4.41497	0.00181418	-1.60406	2.09469e-05	0.734584
Gadd45g	-0.15665	-0.733197	9.91962	0.00186979	1.18032	1.125e-05	0.733197
Scg5	-0.0490497	-0.732216	1.47591	0.00190993	2.73735	0.00293627	0.732216
Irf7	-0.14221	-0.730844	6.6105	0.00196723	1.17849	3.82282e-05	0.730844
Mthfd1l	-0.113198	-0.730816	4.53757	0.00196843	1.06411	0.00792686	0.730816
Tmem178	-0.0855726	-0.73028	4.25281	0.00199122	1.12113	0.000269349	0.73028
Gale	-0.0872537	-0.72968	3.93981	0.00201697	1.18481	0.00113663	0.72968
Tmem229a	0.0550549	0.729262	2.96083	0.00203502	-1.30432	0.00150117	0.729262
Akap12	0.121538	0.726607	8.10096	0.00215302	-1.04817	5.09913e-09	0.726607
Soat2	-0.0644106	-0.725557	1.71437	0.00220114	2.51707	0.00547524	0.725557
Gm2694	-0.0502824	-0.724904	1.71671	0.00223153	3.01735	0.000532135	0.724904
Snhg11	-0.114488	-0.723164	4.54209	0.00231411	1.48803	2.14664e-06	0.723164
Lhfpl3	-0.0416966	-0.722394	1.66024	0.00235141	2.14642	0.00387266	0.722394
Itih5	0.141754	0.719923	9.08953	0.0024744	-1.12446	3.08038e-06	0.719923
D630003M21Rik	0.096958	0.71902	5.5764	0.00252065	-1.02863	2.16593e-06	0.71902
Mkl1	0.135398	0.718813	9.78327	0.00253135	-1.04338	3.4759e-06	0.718813
Gm5567	0.0488489	0.718402	1.90293	0.00255266	-1.93044	0.00489289	0.718402
Cacna1g	0.106899	0.717212	6.06277	0.00261526	-1.07049	1.07669e-06	0.717212
Odz4	0.0884847	0.715999	3.685	0.00268028	-1.52085	0.00011288	0.715999
Pax7	0.152686	0.714616	5.09237	0.00275606	-1.60409	0.000786393	0.714616
1700101I11Rik	-0.0584048	-0.71425	2.49719	0.00277639	2.209	3.82282e-05	0.71425
2310016D03Rik	0.156812	0.713145	6.95379	0.00283846	-1.23043	0.00015155	0.713145
Pcsk6	0.15292	0.71222	8.15122	0.00289132	-1.45049	2.35438e-19	0.71222
Zfp493	0.101036	0.711804	5.70767	0.00291533	-1.02045	1.41986e-05	0.711804
Hspg2	0.189403	0.708939	12.1432	0.00308508	-1.49165	5.85019e-08	0.708939
Dbf4	-0.103563	-0.708675	4.05276	0.00310111	1.48938	9.53283e-05	0.708675
Gm6307	0.121822	0.708248	9.02842	0.00312721	-1.0924	5.26305e-13	0.708248
Baiap3	-0.0538695	-0.707071	2.61213	0.00319994	1.55882	0.00179046	0.707071
Plxna1	0.162756	0.706201	9.06433	0.0032546	-1.20539	3.4963e-05	0.706201
Gm16576	0.143677	0.705657	7.63939	0.00328915	-1.02133	0.000824333	0.705657
Psd3	0.135616	0.704885	9.53822	0.00333868	-1.11873	6.33541e-08	0.704885
Arsi	0.107859	0.704231	4.63149	0.00338111	-1.36605	4.68251e-05	0.704231
Nid1	0.149152	0.703718	10.2694	0.00341471	-1.2043	1.19648e-06	0.703718
Kcng4	0.147199	0.703258	10.4062	0.00344503	-1.32708	2.33876e-16	0.703258
Cebpb	-0.131792	-0.703147	10.4799	0.00345239	1.06251	1.12142e-05	0.703147
Edn3	0.0785449	0.702062	3.70875	0.00352489	-1.22742	0.00171915	0.702062
Kif3c	0.133217	0.700002	10.485	0.00366595	-1.0383	3.75768e-06	0.700002
Cstb	-0.131326	-0.699995	7.41876	0.0036664	1.1554	7.74367e-06	0.699995
Ntn4	0.129148	0.698806	7.05407	0.00374982	-1.03991	0.000130817	0.698806
Mt2	-0.288886	-0.697875	7.68551	0.00381622	1.97336	0.00561338	0.697875
9930111J21Rik1	0.0803724	0.696012	3.43351	0.00395185	-1.71146	9.0807e-06	0.696012
Sacs	0.122088	0.695847	4.60803	0.00396406	-1.59143	1.44785e-05	0.695847
Trpm3	0.0823618	0.695816	3.96464	0.00396631	-1.36327	2.78762e-05	0.695816

## Sheet: eTableS14 6m vs. 28m Rota
gene_id	slope	R	intercept	pval	log2FoldChange	padj	|R|
Ccdc48	0.239867	0.812061	3.58378	0.000235669	-1.63279	2.45851e-05	0.812061		eTable S14 6m vs. 28m. All gene expression changes greater than or equal to + or - log2fc1 with padj<0.05, top DEGs by |R|>0.70, from linear regression with Rotarod at pval<0.05
Wnt5b	-0.336906	-0.798448	5.91533	0.000358464	1.05373	1.44679e-06	0.798448
Coch	0.268122	0.797931	4.26414	0.000363991	-1.42462	1.02917e-05	0.797931
Prelp	0.417736	0.78561	9.8317	0.000517946	-1.09147	4.21047e-06	0.78561
Lrp1	0.366396	0.785364	11.0485	0.000521486	-1.00287	1.63233e-07	0.785364
Vcan	0.443744	0.784968	7.07759	0.000527227	-1.2315	0.000171942	0.784968
Gm4841	-0.787472	-0.778772	7.08239	0.000623994	2.07813	0.000237008	0.778772
Gabrd	-0.21669	-0.777091	3.82434	0.000652587	1.20057	4.11624e-05	0.777091
Tnxb	0.349206	0.760186	10.572	0.00100404	-1.02163	1.7727e-08	0.760186
4831426I19Rik	0.457575	0.757896	6.36851	0.0010616	-1.57552	6.24556e-07	0.757896
Bicc1	0.306914	0.748426	7.16836	0.0013287	-1.06425	4.27928e-10	0.748426
2310001K24Rik	-0.167099	-0.743831	2.594	0.00147652	1.484	0.00208507	0.743831
Igtp	-0.446936	-0.743646	8.08358	0.00148274	1.22809	8.56644e-05	0.743646
Pcdhga11	0.273138	0.743611	4.02684	0.00148393	-1.59185	0.000185639	0.743611
Slit3	0.35266	0.74239	8.13583	0.00152552	-1.11412	2.68917e-08	0.74239
Creb5	0.225241	0.737265	4.24629	0.00171049	-1.15945	0.000481768	0.737265
Amy1	-0.366432	-0.735659	10.0462	0.00177203	1.19282	4.52527e-16	0.735659
Rgag1	0.118751	0.732757	1.39854	0.00188773	-2.44116	0.004837	0.732757
Fbn1	0.529101	0.731375	10.149	0.0019449	-1.54364	6.11995e-07	0.731375
1700093K21Rik	-0.129166	-0.730221	2.26753	0.00199372	1.466	0.00524381	0.730221
Cdkl5	0.243734	0.729698	3.24211	0.00201617	-2.12491	2.87945e-05	0.729698
Prox1	0.193075	0.72844	3.23529	0.00207099	-1.49745	0.000992755	0.72844
Plce1	0.299233	0.723151	6.76519	0.00231471	-1.04181	2.30176e-07	0.723151
BC021891	-0.261783	-0.721652	3.0184	0.00238783	2.21634	1.32172e-06	0.721652
Mrgprb1	0.236053	0.721426	3.68062	0.002399	-1.38567	0.00242978	0.721426
Sipa1l3	0.335645	0.717801	7.37699	0.00258411	-1.01853	2.53199e-05	0.717801
Adamts4	0.273929	0.716274	3.80099	0.00266543	-1.38711	0.00864387	0.716274
Gpr133	0.403321	0.715162	7.10311	0.00272592	-1.42186	7.8324e-09	0.715162
Depdc7	-0.335687	-0.714128	5.94728	0.00278315	1.36182	4.9956e-20	0.714128
1700101I11Rik	-0.157979	-0.714093	2.37002	0.00278514	2.209	3.82282e-05	0.714093
Sacs	0.338806	0.713748	4.88419	0.00280447	-1.59143	1.44785e-05	0.713748
Adamts2	0.350663	0.711767	7.98806	0.00291748	-1.0447	6.81872e-05	0.711767
Fndc1	0.418313	0.708884	9.46062	0.00308841	-1.20927	1.498e-05	0.708884
Egfr	0.32056	0.708699	7.64068	0.00309964	-1.07931	4.17739e-08	0.708699
Dock3	-0.143164	-0.7066	2.53328	0.00322946	1.5679	0.000999397	0.7066
Gm4925	-0.131786	-0.706042	2.22111	0.00326469	1.61462	0.00311746	0.706042
Zyg11a	0.212533	0.705106	4.12732	0.00332443	-1.3292	1.50626e-05	0.705106
St3gal1	0.351713	0.703819	9.12482	0.00340805	-1.08693	3.63491e-07	0.703819
Adra1a	0.28535	0.701311	5.01254	0.00357582	-1.3291	8.89349e-06	0.701311
2210403K04Rik	-0.386812	-0.698933	9.47057	0.00374083	1.36167	8.16237e-24	0.698933
Prap1	0.147015	0.698901	1.97678	0.00374309	-2.51258	0.000480183	0.698901
Gm12185	-0.487873	-0.698356	4.37993	0.00378181	1.7276	0.00122777	0.698356
Mrgprh	0.325724	0.697857	6.2912	0.00381751	-1.22849	2.72349e-07	0.697857
Igsf10	0.430916	0.695874	5.90365	0.00396206	-1.59778	9.17602e-05	0.695874

## Sheet: eTableS15 6m vs. 28m Treadmill
gene_id	slope	R	intercept	pval	log2FoldChange	padj	|R|
Zbp1	-0.192147	-0.432048	4.23826	0.107779	1.48231	0.00437954	0.432048		eTable S15 6m vs. 28m. All gene expression changes greater than or equal to + or - log2fc1 with padj<0.05, top 30 DEGs by |R|, from linear regression with Treadmill at pval<0.05
Bcl2a1b	-0.181618	-0.416332	2.30693	0.122677	2.66268	0.00348375	0.416332
Dntt	0.0497623	0.387578	0.900888	0.153473	3.73983	0.000849059	0.387578
Clec1b	-0.123785	-0.373307	2.90965	0.170517	2.07451	0.00148505	0.373307
Spp1	-0.433663	-0.3653	5.72034	0.180605	1.56077	0.00118047	0.3653
Tmem178	0.0920006	0.345164	4.39976	0.207668	1.12113	0.000269349	0.345164
Plac8	-0.201378	-0.337628	4.33047	0.218425	2.041	0.000675217	0.337628
Gm12185	-0.196243	-0.33411	4.85194	0.223564	1.7276	0.00122777	0.33411
Ldhal6b	0.0512659	0.333048	2.11719	0.225131	-1.6339	0.00524159	0.333048
Ptpn18	-0.144078	-0.329531	5.56674	0.230368	1.28631	0.000407878	0.329531
Gm10638	-0.118718	-0.329346	4.85901	0.230646	1.06879	0.00401249	0.329346
Cd52	-0.180041	-0.329336	5.13054	0.23066	1.74364	9.29724e-05	0.329336
Nme5	-0.0752529	-0.3279	3.73711	0.232822	1.06896	0.00329881	0.3279
Grhl1	-0.0837737	-0.326538	4.24933	0.234884	1.01969	0.00144876	0.326538
Gm4925	-0.0505427	-0.322066	2.35006	0.241733	1.61462	0.00311746	0.322066
E130006D01Rik	0.0697239	0.320567	2.86725	0.244056	1.49539	0.00497848	0.320567
Id1	-0.135964	-0.319059	8.13351	0.246406	1.06583	3.66828e-05	0.319059
Lrrtm2	-0.0578075	-0.318362	2.22634	0.247498	1.90986	0.00230558	0.318362
Nppb	0.0375713	0.318017	0.707664	0.24804	3.55059	0.00293448	0.318017
Plekho1	-0.134724	-0.317089	8.90033	0.249498	1.02829	3.13281e-05	0.317089
Cxcr5	-0.0962271	-0.308922	4.47837	0.26257	1.0745	0.00249424	0.308922
4930509E16Rik	0.0714626	0.305169	3.25398	0.268715	1.57385	0.000351728	0.305169
Chad	0.24231	0.300992	7.08842	0.275654	-1.6772	0.00945505	0.300992
Slpi	-0.0887088	-0.288213	2.28086	0.29754	2.35054	0.00726019	0.288213
Lamc3	0.0790348	0.284781	4.30433	0.303587	-1.27495	2.32545e-05	0.284781
Spc24	-0.097548	-0.283948	5.52613	0.305067	1.03017	0.000413886	0.283948
Hsd3b3	-0.0604927	-0.282764	2.00761	0.307175	2.29115	0.00316775	0.282764
Treml1	-0.0501525	-0.281792	1.76354	0.308913	2.31415	0.00528425	0.281792
Ms4a4b	-0.061541	-0.276487	2.43449	0.318495	1.95093	0.0015479	0.276487
Gabrd	-0.0641118	-0.273462	4.0476	0.324034	1.20057	4.11624e-05	0.273462

## Sheet: eTableS16 Comparison
CFAB		VWR		GRIP TEST		INVERTED CLING		ROTAROD		TREADMILL
gene_id	R	gene_id	R	gene_id	R	gene_id	R	gene_id	R	gene_id	R		eTable S16 Comparison of DEGs Associated with CFAB and with the CFAB Determinants
Dclk3	0.89935	Necab1	0.791268	Tecpr2	0.93739	P2ry1	0.911941	Ccdc48	0.812061	Zbp1	-0.432048		All gene expression changes greater than or equal to + or - log2fc1 with padj<0.05, top 30 DEGs by |R|, from linear regression at pval<0.05; NOTE: For CFAB all DEGs with |R|>0.80 are lsited.
Plekhg1	0.896271	Rims4	-0.687733	3632451O06Rik	-0.935753	Grm1	0.891175	Wnt5b	-0.798448	Bcl2a1b	-0.416332		Green highlight indicates a DEG found on the top 30 CFAB and at least in the top 30 DEGs of the determiannts,
Zfp750	0.895211	Tspan18	-0.681079	Cyr61	-0.927579	Lynx1	0.886174	Coch	0.797931	Dntt	0.387578		Blue highlight indicate s a DEG found on the list of CFAB with|R|>0.80, but not in the top 30 and on at least one of the Top 30 lists of the determinants
Gabrd	-0.885624	Megf6	0.669055	Gm14827	0.924583	Slc10a6	-0.88429	Prelp	0.78561	Clec1b	-0.373307		CFAB = comprehensive functional assessment battery, VWR = voluntary wheel running, R is from linear regression.
Erc2	-0.882122	Plekhg1	0.666175	Golga7b	-0.918079	BC051142	-0.868568	Lrp1	0.785364	Spp1	-0.3653
Ier3	-0.881459	Gck	0.662461	Dpysl5	0.90621	Kdr	0.866637	Vcan	0.784968	Tmem178	0.345164
P2ry1	0.88078	Frem1	0.662379	2210403K04Rik	-0.905404	Rtn4rl2	-0.85738	Gm4841	-0.778772	Plac8	-0.337628
Kdr	0.88013	Zfp750	0.649504	Otog	0.894727	Pcdh12	0.854737	Gabrd	-0.777091	Gm12185	-0.33411
Pde4a	0.877404	Sorcs1	0.640934	Aqp4	0.890109	Wnt5a	0.853992	Tnxb	0.760186	Ldhal6b	0.333048
Zyg11a	0.874788	Sacs	0.637445	Hr	0.887978	Erc2	-0.84427	4831426I19Rik	0.757896	Ptpn18	-0.329531
Pcdh12	0.872928	Akap12	0.6339	Smad3	0.883868	Nr1d1	0.828523	Bicc1	0.748426	Gm10638	-0.329346
Lynx1	0.872916	B3gnt9-ps	0.628262	Ccdc104	-0.883414	Ppp1r1a	-0.823936	2310001K24Rik	-0.743831	Cd52	-0.329336
Lhfpl4	-0.8551	Akap5	0.615056	Zfp750	0.879184	2010300C02Rik	-0.822053	Igtp	-0.743646	Nme5	-0.3279
Tspan18	0.854804	Atp2b4	0.604124	Bace1	0.874229	Zfp385b	0.821644	Pcdhga11	0.743611	Grhl1	-0.326538
Kcng4	0.85339	Loxl2	0.601783	Hipk2	0.872994	Vwa3a	0.820162	Slit3	0.74239	Gm4925	-0.322066
BC051142	-0.850053	Zbtb37	-0.600787	Dopey2	0.87043	Col15a1	0.814497	Creb5	0.737265	E130006D01Rik	0.320567
Cacna2d4	0.849271	Zfp382	-0.599759	Dagla	0.866907	Pde4a	0.811481	Amy1	-0.735659	Id1	-0.319059
Spint2	-0.843845	Tiam1	-0.595455	Btaf1	0.865695	Glul	-0.80925	Rgag1	0.732757	Lrrtm2	-0.318362
Cyp1a1	-0.842289	Dchs1	-0.59535	Myl4	-0.864522	Zyg11a	0.807781	Fbn1	0.731375	Nppb	0.318017
Mmp15	0.840715	Daam2	0.594503	Zbtb16	0.862835	Nr5a2	0.806979	1700093K21Rik	-0.730221	Plekho1	-0.317089
Vwa3a	0.840645	Ston1	0.594433	Zfp180	0.862256	Frem1	0.804568	Cdkl5	0.729698	Cxcr5	-0.308922
Frem1	0.839335	Pcdh12	0.591953	Car3	-0.862215	Kcnn4	-0.803033	Prox1	0.72844	4930509E16Rik	0.305169
Gm5105	0.839013	Col4a3	-0.591646	Ncor2	0.861089	Ier3	-0.799644	Plce1	0.723151	Chad	0.300992
Mfap3l	0.838301	Ret	0.591323	Fam65b	0.854777	Rhpn2	-0.798961	BC021891	-0.721652	Slpi	-0.288213
Dnmt3a	0.837021	Col4a2	0.590115	5330437I02Rik	0.853705	Papln	0.798661	Mrgprb1	0.721426	Lamc3	0.284781
Rbm3	-0.836885	D630003M21Rik	0.587727	Pogk	0.851452	Rbm3	-0.796468	Sipa1l3	0.717801	Spc24	-0.283948
Akap12	0.835578	P2ry1	0.58758	Slc23a3	-0.849951	Caly	-0.795869	Adamts4	0.716274	Hsd3b3	-0.282764
Col4a3	0.834943	Adra1a	-0.587458	Lama3	0.84778	Ror1	0.791878	Gpr133	0.715162	Treml1	-0.281792
Psd3	0.833475	Nr4a3	0.587267	Slc38a4	0.847677	Akap5	0.789213	Depdc7	-0.714128	Ms4a4b	-0.276487
Atp2b4	0.833399	Ptpn4	0.581726	1700071M16Rik	0.844837	Zfp750	0.789004	1700101I11Rik	-0.714093	Gabrd	-0.273462
Nr1d1	0.827489
Ctxn3	-0.826255
Itga1	0.824111
Cyr61	-0.823544
Heatr5a	0.820287
1700101I11Rik	-0.816698
Lhfpl3	-0.815908
Inpp5j	0.815466
Gnmt	-0.81538
Pogk	0.815079
Gm2694	-0.814725
Hspg2	0.814407
Col4a2	0.813671
2210403K04Rik	-0.81272
Tmem229a	0.81166
Lama3	0.811393
Dagla	0.809624
Caly	-0.808968
Zfp366	0.808642
Slc25a36	0.806589
Btaf1	0.806491
Col4a1	0.805565
A530013C23Rik	-0.80538
Fgd4	0.805188
Snhg1	-0.803976
Asl	-0.802292
Trpm3	0.801972
Daam2	0.801821
Megf6	0.801057
Ncor2	0.800652
Amy1	-0.800256
Gm6307	0.798795
Depdc7	-0.798569
Zfp532	0.798066
Ccdc8	0.798062
Fbp1	-0.798007
Gm5567	0.797893
Irf7	-0.797135
Cebpb	-0.79645
2010300C02Rik	-0.796332
Sacs	0.796105
