# Supplementary material for: Skeletal Muscle Transcriptome Alterations Related to Declining Physical Function in Older Mice
Source: J Ageing Longev. Author manuscript; Available in PMC 2023 Oct 24. (PMC10597580; doi:10.3390/jal3020013)
Supplement: JAL3020013 Supplementary Material [file NIHMS1905574-supplement-JAL3020013__Supplementary_Material.zip › eTable S17-S22 6m-24m DEGs with Strong Association to CFAB and CFAB Determinants.xlsx]

## Sheet: eTableS16 6m vs. 24m CFAB
gene_id	slope	R	R2	intercept	pval	log2fc	padj	|R|
Rrad	-0.427013	-0.841467	0.708066	6.99241	0.000161405	4.09047	1.64008e-05	0.841467		eTable S16 6m vs. 24m. All gene expression changes greater than or equal to + or - log2fc 1 with padj<0.05, and with |R| greater than or equal to 0.7 from linear regression with CFAB (Comprehensive Functional Assessment Battery)
Cpne2	-0.300127	-0.826335	0.682829	8.43707	0.000269411	2.69076	7.31203e-05	0.826335
Krt18	-0.597203	-0.82294	0.67723	4.8958	0.000300243	5.27252	0.000312591	0.82294		KEY: m= months of age; slope, R2, R, Intercept, and pvall from linear regression of the gene's expression with CFAB.
Tekt1	-0.207295	-0.821021	0.674076	6.1528	0.000318887	1.80855	0.00953877	0.821021
Ankrd1	-0.336847	-0.819913	0.672258	9.30678	0.000330073	3.10339	0.00164526	0.819913
Klhdc8a	-0.151141	-0.816664	0.66694	4.06271	0.000364711	2.24922	3.42965e-06	0.816664
Myog	-0.276106	-0.812718	0.660511	6.24337	0.000410661	2.41399	0.00247484	0.812718
Sln	-0.43212	-0.811208	0.658059	5.85939	0.000429426	3.82226	0.00700921	0.811208
Gm2694	-0.0736018	-0.810404	0.656755	1.74212	0.000439703	3.3517	0.00832719	0.810404
Runx1	-0.304461	-0.803413	0.645473	6.67906	0.000537619	2.86472	0.000312591	0.803413
Cdkn1a	-0.299526	-0.798846	0.638154	8.22024	0.000610552	2.69744	0.000493647	0.798846
Gadd45a	-0.312384	-0.794608	0.631401	9.11922	0.000685123	2.92535	0.00385109	0.794608
2410137F16Rik	-0.334814	-0.794421	0.631104	5.59596	0.000688575	3.65289	3.42965e-06	0.794421
Aif1l	-0.293897	-0.790758	0.625298	6.88881	0.000759031	2.64404	0.00182043	0.790758
Arhgdig	-0.253876	-0.790659	0.625142	3.90529	0.000761006	3.08036	0.00126058	0.790659
Chrng	-0.419011	-0.785757	0.617415	3.75879	0.000864433	5.0882	0.00138467	0.785757
Hsf2bp	-0.202654	-0.785248	0.616615	3.33219	0.000875792	3.37768	6.2438e-05	0.785248
Tubb6	-0.175398	-0.783242	0.613468	9.32238	0.000921714	1.51875	0.00271355	0.783242
Depdc7	-0.116677	-0.780211	0.608729	6.09611	0.000994709	1.13397	0.00999172	0.780211
Hip1r	-0.134984	-0.778739	0.606434	8.37416	0.0010318	1.19091	0.00436534	0.778739
Gdf5	-0.273538	-0.776371	0.602752	4.23364	0.00109376	3.37884	6.2438e-05	0.776371
Uchl1	-0.267773	-0.766853	0.588064	6.3772	0.00137344	2.55077	0.00551314	0.766853
Chrna1	-0.278908	-0.762053	0.580725	8.55687	0.00153461	2.63309	0.00224088	0.762053
Tnfrsf23	-0.201383	-0.756409	0.572155	7.14525	0.00174298	1.92299	0.00274076	0.756409
Bpifb1	-0.243792	-0.74197	0.550519	2.33458	0.0023794	5.55498	0.00627021	0.74197
Cyr61	-0.116805	-0.741683	0.550094	10.0247	0.00239367	1.13532	6.967e-05	0.741683
Snhg11	-0.0979528	-0.735774	0.541363	4.3383	0.00270326	1.74094	1.79625e-11	0.735774
Acox2	-0.10165	-0.735613	0.541126	2.78056	0.0027121	2.41136	0.00507679	0.735613
Orm1	-0.203797	-0.728707	0.531014	2.98243	0.00311407	3.31978	0.00396836	0.728707
Sik1	-0.183616	-0.727281	0.528938	8.50682	0.00320262	1.61535	0.00627021	0.727281
Mt3	-0.251652	-0.710958	0.505461	4.72777	0.00436459	3.01792	0.00247484	0.710958
Erc2	-0.175394	-0.70519	0.497293	4.22462	0.00484597	3.40783	6.90273e-24	0.70519
Ampd3	-0.174087	-0.696158	0.484636	8.13461	0.00568217	1.80915	0.000721413	0.696158
Timp1	-0.252563	-0.685637	0.470098	4.45302	0.00679363	2.91657	0.00627717	0.685637

## Sheet: eTableS17 6m vs. 24m VWR
gene_id	slope	R	intercept	pval	log2FoldChange	padj	|R|			eTable S17 6m vs. 24m. DEGs greater than or equal to + or - log2fc 1 with padj<0.05, and the top 30 DEGS by |R|from linear regression with CFAB (Comprehensive Functional Assessment Battery)
Arhgdig	-0.702545	-0.375565	4.13516	0.185738	3.08036	0.00126058	0.375565
Sln	-1.11841	-0.360391	6.31413	0.205583	3.82226	0.00700921	0.360391			KEY: m= months of age; slope, R2, R, Intercept, and pvall from linear regression of the gene's expression with VWR.
Prkcz	-0.338732	-0.349164	5.99578	0.221095	1.38026	0.000215857	0.349164
Gm2694	-0.183665	-0.347124	1.82518	0.223989	3.3517	0.00832719	0.347124
Ankrd1	-0.776404	-0.324389	9.73955	0.257831	3.10339	0.00164526	0.324389
Gdf5	-0.641377	-0.31247	4.57613	0.276736	3.37884	6.2438e-05	0.31247
2410137F16Rik	-0.765172	-0.311637	6.03149	0.278087	3.65289	3.42965e-06	0.311637
Krt18	-1.30241	-0.308061	5.72385	0.283931	5.27252	0.000312591	0.308061
Gadd45a	-0.700583	-0.305891	9.5365	0.287512	2.92535	0.00385109	0.305891
Snhg11	-0.235076	-0.303095	4.45651	0.292166	1.74094	1.79625e-11	0.303095
Tekt1	-0.442256	-0.300665	6.44828	0.296245	1.80855	0.00953877	0.300665
Uchl1	-0.60803	-0.298892	6.72874	0.299243	2.55077	0.00551314	0.298892
Rrad	-0.827877	-0.28003	7.6693	0.332206	4.09047	1.64008e-05	0.28003
Tmem8	-0.24497	-0.273701	5.75653	0.343705	1.2928	0.00158281	0.273701
Klhdc8a	-0.291975	-0.270802	4.30316	0.349045	2.24922	3.42965e-06	0.270802
Aif1l	-0.581319	-0.268477	7.34523	0.353361	2.64404	0.00182043	0.268477
Orm1	-0.425945	-0.261428	3.28019	0.366621	3.31978	0.00396836	0.261428
Cpne2	-0.552196	-0.260968	8.93717	0.367495	2.69076	7.31203e-05	0.260968
Runx1	-0.571189	-0.258721	7.17734	0.371785	2.86472	0.000312591	0.258721
Oprd1	-0.141102	-0.252964	2.24008	0.382892	3.02119	0.00176353	0.252964
Hip1r	-0.255411	-0.252924	8.59329	0.38297	1.19091	0.00436534	0.252924
Bpifb1	-0.483443	-0.252555	2.71217	0.383689	5.55498	0.00627021	0.252555
Depdc7	-0.217054	-0.249137	6.28857	0.390374	1.13397	0.00999172	0.249137
Mt3	-0.511434	-0.248014	5.10737	0.392585	3.01792	0.00247484	0.248014
Chrng	-0.743063	-0.239184	4.47984	0.410188	5.0882	0.00138467	0.239184
Erc2	-0.344023	-0.237424	4.49938	0.413746	3.40783	6.90273e-24	0.237424
Chrna1	-0.501024	-0.234978	9.03156	0.418715	2.63309	0.00224088	0.234978
Ankrd55	-0.333591	-0.233975	2.57872	0.42076	4.07552	0.00224088	0.233975
Cdkn1a	-0.47821	-0.218923	8.77912	0.452076	2.69744	0.000493647	0.218923
Sik1	-0.321804	-0.21879	8.82592	0.452358	1.61535	0.00627021	0.21879

## Sheet: eTableS18 6m vs. 24m Grip
gene_id	slope	R	intercept	pval	log2FoldChange	padj	|R|
4933415F23Rik	-0.589469	-0.823834	4.75846	0.000291856	2.09003	0.00092374	0.823834			eTable S18 6m vs. 24m. DEGs greater than or equal to + or - log2fc 1 with padj<0.05, and the top 30 DEGS by |R|from linear regression with the Grip Test
Cyr61	-0.426867	-0.819612	10.2126	0.000333164	1.13532	6.967e-05	0.819612
Aif1l	-0.966242	-0.786124	7.40785	0.000856321	2.64404	0.00182043	0.786124			KEY: m= months of age; slope, R2, R, Intercept, and pvall from linear regression of the gene's expression with VWR.
9130404H23Rik	0.361598	0.761968	2.9231	0.0015376	-2.87098	0.00385109	0.761968
Car3	-0.395237	-0.761952	16.2726	0.00153818	1.05391	0.000567828	0.761952
Sln	-1.31631	-0.747213	6.66729	0.00213003	3.82226	0.00700921	0.747213
Cntn2	-1.55206	-0.732161	3.67755	0.00290753	6.53331	0.000160019	0.732161
Ankrd55	-0.591501	-0.730844	2.59878	0.00298498	4.07552	0.00224088	0.730844
1700001O22Rik	0.561478	0.713691	8.42013	0.00414999	-1.58706	0.00627717	0.713691
Chrna1	-0.861502	-0.711767	9.07322	0.00430018	2.63309	0.00224088	0.711767
2410137F16Rik	-0.988702	-0.709365	6.23531	0.00449362	3.65289	3.42965e-06	0.709365
Tnfrsf23	-0.616993	-0.700763	7.52024	0.00524287	1.92299	0.00274076	0.700763
Chrng	-1.21805	-0.690694	4.56719	0.00624007	5.0882	0.00138467	0.690694
Oprd1	-0.217246	-0.686109	2.26269	0.00674042	3.02119	0.00176353	0.686109
Acox2	-0.30594	-0.669475	2.9722	0.00882202	2.41136	0.00507679	0.669475
Tmem8	-0.338572	-0.666389	5.81233	0.0092574	1.2928	0.00158281	0.666389
Ankrd1	-0.901106	-0.663237	9.99015	0.00971919	3.10339	0.00164526	0.663237
Klhdc8a	-0.403538	-0.65933	4.36967	0.0103158	2.24922	3.42965e-06	0.65933
Ampd3	-0.544428	-0.658324	8.45402	0.0104739	1.80915	0.000721413	0.658324
Uchl1	-0.753859	-0.652819	6.90434	0.0113725	2.55077	0.00551314	0.652819
Cpne2	-0.779262	-0.648772	9.05607	0.01207	2.69076	7.31203e-05	0.648772
Erc2	-0.533005	-0.648009	4.55308	0.0122051	3.40783	6.90273e-24	0.648009
Ak4	-0.336544	-0.645365	6.47967	0.0126822	1.47575	1.1523e-20	0.645365
Runx1	-0.806726	-0.64371	7.30005	0.0129879	2.86472	0.000312591	0.64371
Sik1	-0.5359	-0.641849	8.86015	0.0133386	1.61535	0.00627021	0.641849
Cdkn1a	-0.793188	-0.63968	8.83135	0.0137564	2.69744	0.000493647	0.63968
BC021891	-0.255478	-0.634737	3.66503	0.0147455	1.96365	2.26759e-05	0.634737
Tubb6	-0.45782	-0.618192	9.68309	0.0184556	1.51875	0.00271355	0.618192
Krt18	-1.47603	-0.615034	6.15949	0.0192374	5.27252	0.000312591	0.615034
Bpifb1	-0.661197	-0.608493	2.82529	0.0209363	5.55498	0.00627021	0.608493

## Sheet: eTableS19 6m vs. 24m Cling
gene_id	slope	R	intercept	pval	log2FoldChange	padj	|R|
Rrad	-0.67719	-0.825522	7.89842	0.000276549	4.09047	1.64008e-05	0.825522			eTable S19 6m vs. 24m. DEGs greater than or equal to + or - log2fc 1 with padj<0.05, and the top 30 DEGS by |R|from linear regression with the Inverted Cling Test.
Myog	-0.4408	-0.802653	6.82724	0.000549252	2.41399	0.00247484	0.802653
Gm2694	-0.11606	-0.79053	1.89872	0.000763611	3.3517	0.00832719	0.79053			KEY: m= months of age; slope, R2, R, Intercept, and pvall from linear regression of the gene's expression with VWR.
Snhg11	-0.164801	-0.76579	4.53984	0.00140792	1.74094	1.79625e-11	0.76579
Mt3	-0.435286	-0.760746	5.23765	0.001581	3.01792	0.00247484	0.760746
Tlr2	-0.220533	-0.76019	5.76145	0.00160108	1.45724	0.00385109	0.76019
Depdc7	-0.181495	-0.750783	6.34602	0.00197247	1.13397	0.00999172	0.750783
Klhdc8a	-0.222868	-0.744957	4.39457	0.00223464	2.24922	3.42965e-06	0.744957
Tubb6	-0.267583	-0.739185	9.70155	0.00252095	1.51875	0.00271355	0.739185
Zmynd17	-0.181192	-0.732518	11.081	0.00288683	1.08852	0.000163712	0.732518
Ckap2	-0.243938	-0.73208	3.53172	0.00291226	2.81829	0.00239297	0.73208
Dnase1l3	-0.16493	-0.729464	3.27204	0.00306788	2.39235	0.00104124	0.729464
Cdkn1a	-0.437326	-0.721534	8.8808	0.00357983	2.69744	0.000493647	0.721534
Hsf2bp	-0.300673	-0.720722	3.77593	0.00363584	3.37768	6.2438e-05	0.720722
Cpne2	-0.42253	-0.719666	9.10938	0.00370969	2.69076	7.31203e-05	0.719666
Tekt1	-0.292092	-0.715661	6.61699	0.00400053	1.80855	0.00953877	0.715661
Runx1	-0.437768	-0.714617	7.355	0.00407917	2.86472	0.000312591	0.714617
Hip1r	-0.199368	-0.711516	8.67033	0.00432007	1.19091	0.00436534	0.711516
Cxcl10	-0.359357	-0.710967	4.81978	0.00436389	2.98848	0.000530653	0.710967
Rrm2	-0.239437	-0.705477	5.03703	0.00482111	1.82008	0.00573486	0.705477
Krt18	-0.826621	-0.704652	6.24298	0.00489293	5.27252	0.000312591	0.704652
Erc2	-0.282697	-0.70313	4.59374	0.00502761	3.40783	6.90273e-24	0.70313
Gadd45a	-0.446684	-0.702888	9.8144	0.00504926	2.92535	0.00385109	0.702888
Chrng	-0.600934	-0.697127	4.69006	0.00558739	5.0882	0.00138467	0.697127
Gdf5	-0.391607	-0.687581	4.84206	0.0065765	3.37884	6.2438e-05	0.687581
Ankrd1	-0.453029	-0.682156	10.0754	0.00719629	3.10339	0.00164526	0.682156
Sik1	-0.274737	-0.673179	8.90734	0.00832045	1.61535	0.00627021	0.673179
Orm1	-0.301361	-0.666598	3.42935	0.0092274	3.31978	0.00396836	0.666598
2410137F16Rik	-0.449295	-0.659478	6.36063	0.0102927	3.65289	3.42965e-06	0.659478
Tmem8	-0.162906	-0.655962	5.84923	0.0108526	1.2928	0.00158281	0.655962

## Sheet: eTableS20 6m vs. 24m Rota
gene_id	slope	R	intercept	pval	log2FoldChange	padj	|R|
Depdc7	-0.582462	-0.678478	5.9738	0.00764162	1.13397	0.00999172	0.678478			eTable 20 6m vs. 24m. DEGs greater than or equal to + or - log2fc 1 with padj<0.05, and the top 30 DEGS by |R|from linear regression with Rotarod.
Gm2694	-0.332853	-0.638421	1.69422	0.0140033	3.3517	0.00832719	0.638421
Zmynd17	-0.553814	-0.630469	10.7328	0.0156427	1.08852	0.000163712	0.630469			KEY: m= months of age; slope, R2, R, Intercept, and pvall from linear regression of the gene's expression with VWR.
Klhdc8a	-0.64586	-0.607913	3.99621	0.0210924	2.24922	3.42965e-06	0.607913
Gdf5	-1.21593	-0.601177	4.07348	0.0229682	3.37884	6.2438e-05	0.601177
Hsf2bp	-0.889603	-0.600467	3.22304	0.0231729	3.37768	6.2438e-05	0.600467
Gadd45a	-1.34994	-0.598161	8.96904	0.0238474	2.92535	0.00385109	0.598161
Tekt1	-0.861032	-0.594055	6.08257	0.025085	1.80855	0.00953877	0.594055
Snhg11	-0.437196	-0.572065	4.27944	0.0325494	1.74094	1.79625e-11	0.572065
Rrad	-1.65283	-0.567369	6.94998	0.0343362	4.09047	1.64008e-05	0.567369
Acox2	-0.445379	-0.56145	2.72653	0.0366908	2.41136	0.00507679	0.56145
Krt18	-2.2656	-0.543839	4.87537	0.0444017	5.27252	0.000312591	0.543839
Orm1	-0.8698	-0.541771	2.89367	0.0453794	3.31978	0.00396836	0.541771
Mt3	-1.07805	-0.530548	4.61477	0.0509599	3.01792	0.00247484	0.530548
Chrng	-1.62392	-0.530481	3.7154	0.0509947	5.0882	0.00138467	0.530481
Cpne2	-1.10513	-0.530034	8.45512	0.0512269	2.69076	7.31203e-05	0.530034
Bpifb1	-0.984958	-0.522188	2.27539	0.0554295	5.55498	0.00627021	0.522188
Myog	-1.01045	-0.518108	6.26523	0.0577101	2.41399	0.00247484	0.518108
Tubb6	-0.660879	-0.514086	9.3202	0.0600246	1.51875	0.00271355	0.514086
Ankrd1	-1.21046	-0.513246	9.35231	0.0605159	3.10339	0.00164526	0.513246
Uchl1	-1.00697	-0.502344	6.37555	0.067161	2.55077	0.00551314	0.502344
2410137F16Rik	-1.21456	-0.502005	5.63156	0.0673756	3.65289	3.42965e-06	0.502005
Arhgdig	-0.919511	-0.498845	3.93351	0.0693999	3.08036	0.00126058	0.498845
Cdkn1a	-1.05588	-0.490554	8.27803	0.0749159	2.69744	0.000493647	0.490554
Chrna1	-1.00737	-0.479461	8.59024	0.0827727	2.63309	0.00224088	0.479461
Hip1r	-0.474972	-0.477328	8.40094	0.084347	1.19091	0.00436534	0.477328
Ostn	-0.494931	-0.473106	8.08044	0.0875254	1.38078	4.18654e-06	0.473106
Runx1	-1.02278	-0.470144	6.78055	0.0898045	2.86472	0.000312591	0.470144
Sln	-1.40388	-0.459091	6.04383	0.098675	3.82226	0.00700921	0.459091
Aif1l	-0.978996	-0.45885	6.99379	0.0988752	2.64404	0.00182043	0.45885

## Sheet: eTableS20 6m vs. 24m Treadmill
gene_id	slope	R	intercept	pval	log2FoldChange	padj	|R|
2010300C02Rik	0.226846	0.547486	5.69037	0.0427154	1.03208	0.00137367	0.547486			eTable 21 6m vs. 24m. DEGs greater than or equal to + or - log2fc 1 with padj<0.05, and the top 30 DEGS by |R|from linear regression with Treadmill.
Foxq1	0.118085	0.371228	2.63374	0.191279	2.23981	0.00709061	0.371228
Car3	0.20691	0.36138	16.5269	0.204251	1.05391	0.000567828	0.36138			KEY: m= months of age; slope, R2, R, Intercept, and pvall from linear regression of the gene's expression with VWR.
Ostn	0.232281	0.349187	8.59445	0.221063	1.38078	4.18654e-06	0.349187
Dnase1l3	0.150434	0.294646	3.44334	0.306492	2.39235	0.00104124	0.294646
BC021891	0.130178	0.293017	3.82795	0.309299	1.96365	2.26759e-05	0.293017
Ly6g6e	-0.1041	-0.283659	3.76187	0.325711	-1.59597	3.08432e-05	0.283659
Arhgdig	-0.285521	-0.2436	4.59448	0.401335	3.08036	0.00126058	0.2436
Ak4	0.133109	0.231251	6.67855	0.426344	1.47575	1.1523e-20	0.231251
Snhg11	0.107085	0.220357	4.69328	0.449045	1.74094	1.79625e-11	0.220357
Bpifb1	-0.262291	-0.218686	3.00126	0.452578	5.55498	0.00627021	0.218686
Chrna1	-0.286836	-0.214699	9.32502	0.461065	2.63309	0.00224088	0.214699
Tekt1	-0.196464	-0.213167	6.73057	0.464345	1.80855	0.00953877	0.213167
Sln	-0.408309	-0.209985	7.0643	0.471196	3.82226	0.00700921	0.209985
9130404H23Rik	-0.106979	-0.204231	2.72419	0.483707	-2.87098	0.00385109	0.204231
Uchl1	-0.258464	-0.202776	7.12162	0.486894	2.55077	0.00551314	0.202776
Cntn2	-0.45751	-0.195529	4.15547	0.502917	6.53331	0.000160019	0.195529
Krt18	-0.516919	-0.195137	6.58045	0.503792	5.27252	0.000312591	0.195137
Ankrd1	-0.288985	-0.1927	10.258	0.509238	3.10339	0.00164526	0.1927
Oprd1	0.0647217	0.185184	2.38238	0.526202	3.02119	0.00176353	0.185184
Tnfrsf23	-0.178103	-0.183263	7.71178	0.530578	1.92299	0.00274076	0.183263
Gadd45a	-0.259791	-0.181034	10.0048	0.535676	2.92535	0.00385109	0.181034
Cpne2	-0.233708	-0.176277	9.29439	0.546625	2.69076	7.31203e-05	0.176277
Aif1l	-0.228874	-0.1687	7.72832	0.564259	2.64404	0.00182043	0.1687
Erc2	0.15151	0.16688	4.84375	0.568532	3.40783	6.90273e-24	0.16688
Ankrd55	-0.146485	-0.163974	2.79235	0.575379	4.07552	0.00224088	0.163974
Zmynd17	0.0908326	0.162619	11.2387	0.578584	1.08852	0.000163712	0.162619
Runx1	-0.207295	-0.149853	7.56097	0.609122	2.86472	0.000312591	0.149853
Rrm2	0.11268	0.147024	5.24237	0.615974	1.82008	0.00573486	0.147024
Timp1	-0.196034	-0.14579	5.17473	0.618972	2.91657	0.00627717	0.14579
