# Supplementary material for: Skeletal Muscle Transcriptome Alterations Related to Declining Physical Function in Older Mice
Source: J Ageing Longev. Author manuscript; Available in PMC 2023 Oct 24. (PMC10597580; doi:10.3390/jal3020013)
Supplement: JAL3020013 Supplementary Material [file NIHMS1905574-supplement-JAL3020013__Supplementary_Material.zip › eTable S23-S24 DEGs vs. TA Mass.xlsx]

## Sheet: eTable S23 6m-28m DEGS vs. TA
gene_id	slope	R	intercept	pval	log2FoldChange	padj	|R|
2210403K04Rik	-0.051085	-0.960531	12.4872	1.34216e-08	1.36167	8.16237e-24	0.960531			eTable S23 6m-28m DEGS vs. TA. DEGs (|log2fc|≥1, padj<0.05) from 6m to 28m regressed against the TA mass, all DEGs with |R|>0.70
Dagla	0.0579974	0.938983	4.80583	2.16171e-07	-1.55593	1.38446e-13	0.938983
Pdzd7	0.0466519	0.929763	5.17981	5.27573e-07	-1.21177	1.13936e-08	0.929763			KEY: m= months of age; slope, R2, R, Intercept, and pval from linear regression of the gene's expression with CFAB,
Dnmt3a	0.0445667	0.927718	8.28675	6.32576e-07	-1.16314	2.65824e-15	0.927718
Cyr61	-0.0458007	-0.926712	12.5658	6.9034e-07	1.20679	8.86102e-15	0.926712
Pde4a	0.0464621	0.922264	8.12199	1.00144e-06	-1.21079	3.3393e-14	0.922264
Zfp180	0.0419448	0.920394	6.60168	1.16345e-06	-1.05356	2.68917e-08	0.920394
Ccdc104	-0.0405967	-0.919873	10.0292	1.21227e-06	1.14823	4.74316e-15	0.919873
Gm6307	0.0410165	0.917181	6.84877	1.49281e-06	-1.0924	5.26305e-13	0.917181
Dopey2	0.0444927	0.916567	7.1261	1.56383e-06	-1.11347	9.78717e-09	0.916567
Atp2b4	0.0414454	0.915345	6.25291	1.71367e-06	-1.1343	5.74437e-15	0.915345
Tmem229a	0.0179551	0.914772	2.00481	1.78802e-06	-1.30432	0.00150117	0.914772
Neto2	0.0521607	0.914027	4.63792	1.88851e-06	-1.388	1.41042e-07	0.914027
Mfap3l	0.0377469	0.913759	5.55059	1.92591e-06	-1.08915	2.26987e-15	0.913759
Gins1	-0.0288954	-0.911885	6.56649	2.20442e-06	1.04563	9.48171e-06	0.911885
Pogk	0.0438182	0.911843	6.26932	2.21104e-06	-1.1407	1.05869e-09	0.911843
Ier3	-0.0423277	-0.910773	9.71053	2.38511e-06	1.22717	3.13816e-13	0.910773
Rel	0.0400514	0.909654	3.37795	2.5793e-06	-1.28042	2.70874e-06	0.909654
Hipk2	0.0807994	0.909452	5.12239	2.6157e-06	-2.01867	1.63036e-09	0.909452
Fam65b	0.0519688	0.906813	3.98629	3.13219e-06	-1.57577	3.45972e-12	0.906813
Zfp366	0.0757991	0.905822	1.54224	3.34684e-06	-2.47652	9.45232e-06	0.905822
4933439F18Rik	0.0454822	0.904394	8.67711	3.67777e-06	-1.09934	1.25874e-07	0.904394
Smox	0.0654069	0.902759	9.20833	4.08982e-06	-1.63616	8.81043e-09	0.902759
Slc38a4	0.0706168	0.90272	7.24112	4.10011e-06	-1.82077	2.95388e-11	0.90272
Arhgap20	0.0744252	0.901392	5.54946	4.46316e-06	-1.76844	2.06765e-07	0.901392
Pdzd2	0.0516166	0.900576	6.56617	4.69919e-06	-1.2404	1.0009e-06	0.900576
Car3	-0.0508034	-0.899558	18.9519	5.00817e-06	1.32361	9.04454e-12	0.899558
3632451O06Rik	-0.0418029	-0.899486	9.41703	5.03073e-06	1.14154	5.26409e-08	0.899486
Ep300	0.0479696	0.897696	7.9098	5.61734e-06	-1.17563	8.81816e-08	0.897696
Abl2	0.0406846	0.897572	7.51331	5.65978e-06	-1.00895	1.70041e-07	0.897572
Cacng4	-0.0225119	-0.897379	3.5036	5.72685e-06	2.62953	7.60809e-05	0.897379
Plb1	-0.0248136	-0.896866	5.60644	5.90801e-06	1.09762	6.01679e-05	0.896866
Cdk19	0.0457024	0.896771	7.47707	5.94187e-06	-1.15111	1.48278e-08	0.896771
Fgd4	0.0580189	0.895243	3.92589	6.51263e-06	-1.61221	1.7542e-08	0.895243
Btaf1	0.0557915	0.893234	6.30996	7.33185e-06	-1.55249	2.00893e-18	0.893234
2310050B05Rik	-0.0511097	-0.891665	11.9486	8.02982e-06	1.36988	1.62e-09	0.891665
Dclk3	0.0178379	0.891127	2.78632	8.28123e-06	-1.02509	0.000675217	0.891127
Sema5a	0.0456943	0.890687	3.92132	8.49208e-06	-1.47413	1.4941e-12	0.890687
Rhoc	-0.0375481	-0.890397	11.5395	8.63327e-06	1.03916	1.7088e-11	0.890397
Gm5105	0.0720043	0.888436	3.65387	9.64092e-06	-1.93046	2.68917e-08	0.888436
Asl	-0.0371311	-0.888363	9.14074	9.68046e-06	1.10301	4.04956e-10	0.888363
1700001O22Rik	0.0952132	0.88821	2.6588	9.7631e-06	-2.53669	6.18374e-06	0.88821
Zfp609	0.0477594	0.887921	6.67842	9.92124e-06	-1.17495	5.8135e-07	0.887921
Myo7b	0.0161904	0.887648	1.68909	1.00724e-05	-1.43847	0.00253913	0.887648
Asxl3	0.0192416	0.887115	1.3155	1.03736e-05	-1.94508	0.000533172	0.887115
Depdc7	-0.0400255	-0.886056	8.35015	1.09931e-05	1.36182	4.9956e-20	0.886056
Pcsk6	0.0494404	0.885662	5.51734	1.12315e-05	-1.45049	2.35438e-19	0.885662
Zfp532	0.0385409	0.88494	6.64508	1.16797e-05	-1.00275	4.73607e-08	0.88494
Auts2	0.0545076	0.88455	5.5875	1.19279e-05	-1.36441	6.63145e-07	0.88455
Gadd45g	-0.0491285	-0.884425	12.542	1.20083e-05	1.18032	1.125e-05	0.884425
Wasf3	0.0225505	0.883236	1.80073	1.27963e-05	-1.5627	0.00104958	0.883236
Mme	0.0448731	0.883113	3.66887	1.28799e-05	-1.46113	3.45343e-10	0.883113
Bend5	-0.0238863	-0.882433	4.97936	1.33526e-05	1.27902	0.000175538	0.882433
Kdr	0.0507207	0.882225	7.55786	1.35e-05	-1.27986	1.54964e-08	0.882225
Gstm2	-0.0431041	-0.882088	12.192	1.35974e-05	1.1977	1.60152e-13	0.882088
Mustn1	-0.059506	-0.881862	14.4348	1.376e-05	1.67559	1.52261e-16	0.881862
Slc6a2	0.0266014	0.88141	2.29674	1.409e-05	-1.37206	0.000297953	0.88141
Pcnx	0.0438788	0.880509	9.20321	1.4767e-05	-1.06933	5.8135e-07	0.880509
Phc1	0.0481386	0.880326	6.36098	1.49075e-05	-1.20802	3.01103e-07	0.880326
Mast4	0.0516755	0.879887	7.41057	1.52503e-05	-1.148	5.41686e-05	0.879887
Spen	0.0451292	0.879476	7.16613	1.55769e-05	-1.12633	3.94133e-07	0.879476
Cacna1c	0.0439871	0.877822	3.55135	1.69488e-05	-1.29007	3.37513e-05	0.877822
Dyrk2	0.0519442	0.876707	6.66715	1.79299e-05	-1.28071	6.48887e-07	0.876707
5031439G07Rik	0.0413898	0.876443	9.64844	1.81695e-05	-1.01679	5.85123e-07	0.876443
Foxn3	0.0443277	0.875092	7.11362	1.94338e-05	-1.11549	2.86048e-07	0.875092
Zfp652	0.0665155	0.874639	5.80259	1.98736e-05	-1.56173	4.39572e-06	0.874639
Cdhr3	-0.0336081	-0.873451	6.2945	2.10677e-05	1.29785	0.000104505	0.873451
9830001H06Rik	0.0436123	0.873142	5.54626	2.1388e-05	-1.15326	2.41731e-07	0.873142
Cacna2d4	0.0539386	0.872998	5.42525	2.15384e-05	-1.43511	9.73309e-09	0.872998
Ncor2	0.0482862	0.872611	8.95692	2.19471e-05	-1.21925	3.30453e-08	0.872611
Iqsec1	0.0460127	0.872503	8.45011	2.20622e-05	-1.13401	3.64182e-07	0.872503
Kcng4	0.0474812	0.872503	7.8763	2.20625e-05	-1.32708	2.33876e-16	0.872503
Itga1	0.0478913	0.872217	5.50644	2.23703e-05	-1.21499	2.16593e-06	0.872217
Plekhg1	0.0369189	0.872086	4.85628	2.25124e-05	-1.14073	6.29133e-11	0.872086
Mlxip	0.0462627	0.870616	8.61248	2.41588e-05	-1.13716	5.06887e-07	0.870616
Mkl1	0.0426258	0.870388	7.50858	2.44226e-05	-1.04338	3.4759e-06	0.870388
Snhg1	-0.0366197	-0.87023	8.80613	2.46071e-05	1.08821	1.2849e-07	0.87023
Lamc3	0.0275778	0.869381	2.88078	2.56171e-05	-1.27495	2.32545e-05	0.869381
Mmp15	0.040459	0.869339	7.05615	2.56686e-05	-1.06891	1.31391e-08	0.869339
Zmiz2	0.0465542	0.868743	8.18328	2.64002e-05	-1.13367	1.51013e-06	0.868743
Itga11	0.0466988	0.868045	3.72744	2.72778e-05	-1.56496	1.71125e-12	0.868045
Nptxr	0.0123886	0.867996	0.757023	2.73403e-05	-2.34379	0.00282855	0.867996
Mrgprh	0.038933	0.867994	3.95489	2.73427e-05	-1.22849	2.72349e-07	0.867994
Bace1	0.0400033	0.866482	8.0771	2.93324e-05	-1.00041	3.53597e-06	0.866482
Rbm3	-0.0479009	-0.866043	12.5761	2.99311e-05	1.35511	1.1783e-12	0.866043
Rab11fip3	0.0435995	0.866024	9.13341	2.99569e-05	-1.00434	2.78762e-05	0.866024
1700020I14Rik	0.0652108	0.865163	7.80558	3.1163e-05	-1.55509	1.00929e-06	0.865163
Pcdhga11	0.0305204	0.86464	2.17391	3.19157e-05	-1.59185	0.000185639	0.86464
Zfp750	0.0333739	0.863328	2.7869	3.38689e-05	-1.57142	1.11721e-09	0.863328
Golga7b	-0.0413296	-0.863083	9.03577	3.42447e-05	1.20521	5.85019e-08	0.863083
Tnrc18	0.0456361	0.862888	7.63364	3.4545e-05	-1.03568	7.49097e-05	0.862888
Slc23a3	-0.0216866	-0.862551	3.77097	3.50707e-05	2.08122	0.000111461	0.862551
Pabpc1l	-0.0184138	-0.862313	3.70228	3.54474e-05	1.52261	0.00160454	0.862313
Nradd	-0.0265622	-0.86174	6.22403	3.63644e-05	1.03734	4.03782e-05	0.86174
Usp24	0.0454374	0.861575	9.56444	3.66322e-05	-1.07963	6.94689e-06	0.861575
1700112E06Rik	-0.0342014	-0.861082	7.13536	3.74417e-05	1.29701	8.81043e-09	0.861082
Lama3	0.0430418	0.860623	3.06647	3.82092e-05	-1.57339	4.34796e-08	0.860623
Gstm7	-0.0397237	-0.860067	7.76743	3.91563e-05	1.34045	4.63896e-07	0.860067
Nos1	0.114167	0.859847	4.0571	3.95353e-05	-2.41179	0.000887102	0.859847
Gnmt	-0.0396881	-0.85771	6.84916	4.33875e-05	1.60698	8.244e-07	0.85771
Psmg4	-0.0439354	-0.857363	9.22237	4.40402e-05	1.33233	1.21794e-08	0.857363
A630055G03Rik	0.0368397	0.85701	3.6029	4.47147e-05	-1.19878	1.44785e-05	0.85701
Heatr5a	0.0391582	0.85679	7.32814	4.51391e-05	-1.00062	6.66117e-07	0.85679
Eif2c2	0.0828663	0.85668	5.03209	4.53524e-05	-1.85436	0.000398328	0.85668
Psd3	0.0428371	0.856372	7.25275	4.59527e-05	-1.11873	6.33541e-08	0.856372
Nr1d1	0.0420411	0.855994	9.86063	4.67006e-05	-1.00714	7.35941e-06	0.855994
Zfp493	0.0315891	0.855972	4.02119	4.6745e-05	-1.02045	1.41986e-05	0.855972
Ace	0.0458672	0.855941	7.3528	4.68063e-05	-1.24814	1.06004e-09	0.855941
Hr	0.0481185	0.85563	8.30671	4.74285e-05	-1.25754	2.15652e-07	0.85563
Spnb2	0.0401996	0.854943	9.82353	4.88308e-05	-1.0297	1.19519e-07	0.854943
Ssh1	0.0477327	0.854782	3.81465	4.91637e-05	-1.35834	1.64728e-05	0.854782
Myl12a	-0.0493447	-0.854491	14.9962	4.97715e-05	1.38868	4.00047e-10	0.854491
2610002J02Rik	-0.0375937	-0.853999	7.92266	5.08127e-05	1.22944	4.06533e-07	0.853999
Ebf2	0.0426799	0.853912	3.76461	5.09972e-05	-1.407	1.21794e-08	0.853912
Amy1	-0.0408677	-0.853778	12.5282	5.12859e-05	1.19282	4.52527e-16	0.853778
Daam2	0.037948	0.85367	5.32375	5.15189e-05	-1.06102	3.80974e-07	0.85367
Pak1	-0.0471314	-0.853609	11.9254	5.16507e-05	1.23399	6.24556e-07	0.853609
Coch	0.0275602	0.853492	2.56504	5.19042e-05	-1.42462	1.02917e-05	0.853492
H2afj	-0.0378789	-0.85321	10.4369	5.25184e-05	1.06318	4.97642e-08	0.85321
Smad3	0.0477215	0.852969	8.91019	5.30507e-05	-1.23391	8.55544e-07	0.852969
Mrs2	0.0519424	0.852866	5.9527	5.3277e-05	-1.27298	8.65709e-06	0.852866
9930111J21Rik1	0.0256015	0.852729	2.06834	5.35827e-05	-1.71146	9.0807e-06	0.852729
Aqp4	0.03755	0.85202	7.8121	5.5183e-05	-1.00661	1.78263e-08	0.85202
Nme4	-0.0404917	-0.851704	7.63158	5.59077e-05	1.47153	2.68917e-08	0.851704
2410137F16Rik	-0.0676254	-0.851509	9.55989	5.63591e-05	2.3363	1.75564e-10	0.851509
Zyg11a	0.0246538	0.851125	2.64032	5.7259e-05	-1.3292	1.50626e-05	0.851125
Zbtb38	0.0492936	0.850832	6.71159	5.79513e-05	-1.16479	3.14512e-05	0.850832
Spint2	-0.0436204	-0.850334	9.06388	5.91453e-05	1.43636	3.42069e-14	0.850334
Map1lc3a	-0.0391362	-0.848765	14.565	6.30434e-05	1.04273	1.50808e-07	0.848765
2700086A05Rik	0.0170568	0.848098	1.18995	6.47634e-05	-2.31108	0.000153004	0.848098
Hspg2	0.0588947	0.847881	8.99779	6.53306e-05	-1.49165	5.85019e-08	0.847881
Gadd45a	-0.072955	-0.847764	13.4781	6.56382e-05	2.11311	4.20348e-11	0.847764
Hspb3	-0.0397245	-0.847375	11.0483	6.66718e-05	1.12064	1.57031e-08	0.847375
Prokr1	0.0300109	0.846675	2.19286	6.85617e-05	-1.74792	1.13596e-06	0.846675
Tmem8	-0.0342182	-0.845867	7.55872	7.07987e-05	1.19805	5.28708e-08	0.845867
Zhx3	0.0517842	0.845709	4.74083	7.12442e-05	-1.31497	2.82401e-05	0.845709
Nt5c	-0.0353874	-0.845588	8.55286	7.1586e-05	1.06668	2.43127e-06	0.845588
C920006O11Rik	-0.0288331	-0.84545	6.40657	7.19789e-05	1.05069	0.000122127	0.84545
D830031N03Rik	0.0701395	0.845281	3.22836	7.24589e-05	-1.67512	0.000473089	0.845281
Zdhhc5	0.0426091	0.844493	9.1233	7.47442e-05	-1.03109	9.0807e-06	0.844493
Hivep1	0.0424719	0.843757	6.8659	7.69293e-05	-1.06291	5.85611e-06	0.843757
Wdfy3	0.0444609	0.843215	7.58233	7.85724e-05	-1.05659	3.15343e-05	0.843215
Bicc1	0.0332275	0.843165	5.13957	7.87238e-05	-1.06425	4.27928e-10	0.843165
Pde3a	0.0441989	0.843154	2.6289	7.87595e-05	-1.68212	1.1795e-05	0.843154
Nudt16	-0.0347339	-0.843062	9.34493	7.90412e-05	1.00892	2.64189e-07	0.843062
Col4a4	0.033247	0.842581	3.32146	8.05293e-05	-1.36543	1.32426e-09	0.842581
Has3	0.0438331	0.841886	3.63654	8.27227e-05	-1.28824	0.000111991	0.841886
Heatr5b	0.0405069	0.841764	5.78925	8.3113e-05	-1.00045	7.04805e-05	0.841764
Akap12	0.0366032	0.841671	6.14196	8.34101e-05	-1.04817	5.09913e-09	0.841671
Abca8b	0.0399184	0.841515	7.0658	8.39147e-05	-1.00282	8.16355e-06	0.841515
2810008D09Rik	-0.0433781	-0.841258	9.34693	8.47477e-05	1.27492	4.63896e-07	0.841258
Mbd5	0.0541963	0.841123	5.39858	8.51868e-05	-1.29544	6.01485e-05	0.841123
Lamc1	0.0420029	0.841001	8.66533	8.55866e-05	-1.10896	6.56728e-08	0.841001
Ston1	0.0560078	0.840716	2.99831	8.65242e-05	-1.76535	4.61902e-06	0.840716
Ankrd1	-0.0890842	-0.840379	14.877	8.76479e-05	2.68099	1.03048e-17	0.840379
Tcap	-0.0401526	-0.840025	18.2596	8.88401e-05	1.08463	1.04214e-07	0.840025
Snph	0.0476209	0.839988	2.75599	8.8964e-05	-1.63472	6.83178e-05	0.839988
Tbcb	-0.0356443	-0.839856	11.1334	8.94111e-05	1.00553	4.73546e-08	0.839856
St3gal1	0.0403232	0.839675	6.68778	9.00289e-05	-1.08693	3.63491e-07	0.839675
Celf4	-0.0250188	-0.839388	4.94693	9.10164e-05	1.37857	0.000325513	0.839388
1700101I11Rik	-0.0178439	-0.839322	3.45128	9.12433e-05	2.209	3.82282e-05	0.839322
Trip11	0.0531309	0.839253	6.05285	9.14833e-05	-1.34488	2.32225e-06	0.839253
Ak4	-0.0338593	-0.838782	8.09588	9.31269e-05	1.08134	1.24235e-07	0.838782
Bahcc1	0.0448541	0.837929	5.39511	9.61667e-05	-1.1592	1.43219e-05	0.837929
Pomp	-0.0374134	-0.837538	12.7393	9.759e-05	1.0263	1.32264e-07	0.837538
Tecpr2	0.0384052	0.836985	6.90608	9.96286e-05	-1.07503	1.46414e-07	0.836985
Raver2	0.0442751	0.836913	5.35156	9.98946e-05	-1.23875	1.49458e-07	0.836913
Dcxr	-0.0389602	-0.836534	9.52472	0.000101317	1.16678	2.93886e-08	0.836534
Rpl3	-0.0436354	-0.836051	12.3216	0.000103151	1.30029	1.5693e-07	0.836051
Zfyve26	0.0411421	0.835916	6.68832	0.00010367	-1.00054	4.99601e-05	0.835916
4933415F23Rik	-0.0794959	-0.835267	9.44548	0.000106188	2.94719	5.85019e-08	0.835267
Gdap1l1	-0.0204037	-0.834868	3.77071	0.00010776	1.68509	0.00150951	0.834868
Gm15800	0.0443052	0.83454	7.09397	0.000109068	-1.07636	2.61143e-05	0.83454
Grlf1	0.0481245	0.834423	7.53912	0.000109537	-1.13656	4.13151e-05	0.834423
4930578C19Rik	0.042568	0.834282	3.0334	0.000110106	-1.31164	0.00111839	0.834282
Kif3c	0.0412796	0.834281	8.27986	0.00011011	-1.0383	3.75768e-06	0.834281
Trpm3	0.0256544	0.833619	2.59467	0.000112812	-1.36327	2.78762e-05	0.833619
Sertad1	-0.0408129	-0.833502	9.58785	0.000113293	1.18785	6.24556e-07	0.833502
Ccdc48	0.0236587	0.833474	2.11353	0.000113411	-1.63279	2.45851e-05	0.833474
Ptar1	0.0313571	0.83264	3.73793	0.000116902	-1.15454	6.24556e-07	0.83264
Grem2	0.0703432	0.832636	2.268	0.000116921	-2.44809	1.06004e-09	0.832636
Zfhx2	0.038593	0.832477	5.66755	0.000117597	-1.01379	1.82467e-05	0.832477
Dst	0.0466354	0.832214	11.2404	0.000118721	-1.11453	1.87131e-05	0.832214
Tspo	-0.0409993	-0.831721	11.0258	0.000120855	1.13064	6.52387e-07	0.831721
Cxcl10	-0.0577189	-0.830961	7.83124	0.000124207	2.6054	1.89818e-11	0.830961
3110021N24Rik	0.0383587	0.830587	5.1944	0.000125882	-1.00185	8.02887e-05	0.830587
4831426I19Rik	0.0481629	0.830123	3.41249	0.000127989	-1.57552	6.24556e-07	0.830123
Pcdhgb6	0.043627	0.829816	2.68455	0.000129398	-1.51308	0.000822075	0.829816
Sec14l5	0.0788195	0.828903	3.90675	0.000133664	-1.90239	0.000416436	0.828903
Ift27	-0.0375379	-0.828844	9.51155	0.000133947	1.02148	3.4845e-05	0.828844
2310034G01Rik	-0.0280631	-0.828404	5.3619	0.000136046	1.42789	0.000129478	0.828404
Notch3	0.0421284	0.828136	7.36445	0.000137341	-1.03029	2.80001e-05	0.828136
Hes6	-0.0394324	-0.827943	9.73757	0.000138278	1.09808	1.30592e-05	0.827943
Inpp5j	0.0421997	0.827871	4.47752	0.000138627	-1.20655	1.02592e-05	0.827871
Dennd4c	0.0568185	0.827761	6.41914	0.000139166	-1.29161	0.000148482	0.827761
Gpr17	0.0463412	0.827597	2.73755	0.000139972	-1.51699	0.000733146	0.827597
Arl5b	0.0624886	0.826624	3.92686	0.000144826	-1.57835	0.000113982	0.826624
Hmbox1	0.0615224	0.826537	3.27359	0.000145266	-1.72946	3.34172e-05	0.826537
Samd5	0.0408775	0.825913	2.09414	0.000148459	-2.06173	5.01878e-07	0.825913
Wdfy2	0.0517119	0.825833	3.22292	0.000148871	-1.44961	0.00050841	0.825833
Pde10a	0.0359528	0.825683	5.22754	0.000149654	-1.02283	3.91895e-06	0.825683
Cpeb4	0.0936979	0.825668	4.14613	0.000149727	-2.07033	0.00157024	0.825668
Ctla2b	-0.0335858	-0.8255	7.48584	0.000150604	1.0555	8.83482e-05	0.8255
Dock3	-0.0160601	-0.824841	3.50763	0.00015408	1.5679	0.000999397	0.824841
Cbl	0.0571	0.824661	3.07859	0.00015504	-1.67422	8.15388e-05	0.824661
E030010A14Rik	-0.0349952	-0.824642	6.53715	0.00015514	1.43973	1.16999e-05	0.824642
Rpl13a	-0.0410792	-0.824459	14.7875	0.000156123	1.14491	8.76255e-08	0.824459
Pggt1b	0.0550978	0.824365	4.60108	0.000156633	-1.37962	9.07691e-05	0.824365
E130306D19Rik	-0.0183208	-0.823949	3.50074	0.000158891	1.52883	0.00595088	0.823949
Ret	0.0400549	0.823675	4.29397	0.00016039	-1.32138	1.57462e-09	0.823675
Erc2	-0.0714833	-0.823632	8.65359	0.000160627	3.54275	4.92333e-20	0.823632
Atf7	0.0620563	0.823115	3.69182	0.000163497	-1.57582	0.000192914	0.823115
Arhgap5	0.0452623	0.822906	7.64635	0.000164667	-1.07432	6.53192e-05	0.822906
E2f2	-0.0391555	-0.822815	9.43893	0.000165177	1.07637	3.2033e-05	0.822815
Lama2	0.0379018	0.822696	7.7528	0.000165852	-1.01018	1.00929e-06	0.822696
Rpl35	-0.0358307	-0.822644	12.4299	0.000166147	1.00138	1.64504e-07	0.822644
Slc26a1	0.0142448	0.822519	1.15953	0.000166856	-1.93696	0.00256668	0.822519
Arhgdig	-0.0582313	-0.821116	7.60129	0.000174986	2.62652	3.30453e-08	0.821116
Sipa1l3	0.0368611	0.820303	5.13217	0.000179848	-1.01853	2.53199e-05	0.820303
Ttll4	0.0556433	0.820031	4.41894	0.000181497	-1.41399	8.98078e-05	0.820031
Man1a	0.0356389	0.819989	6.00184	0.000181751	-1.03017	2.50421e-07	0.819989
8430408G22Rik	-0.0475825	-0.819975	9.77054	0.000181838	1.29431	3.72159e-05	0.819975
Gm4925	-0.014704	-0.819747	3.11404	0.000183235	1.61462	0.00311746	0.819747
Crybg3	0.0462454	0.819728	7.22043	0.000183348	-1.13134	2.54433e-05	0.819728
Slc25a36	0.047128	0.819551	6.03781	0.000184438	-1.27844	6.33454e-07	0.819551
Cdkn1a	-0.0748876	-0.819439	12.7501	0.000185128	2.20663	1.05085e-08	0.819439
Bmpr2	0.0779836	0.819151	4.75015	0.000186921	-1.76329	0.00113728	0.819151
Gabrd	-0.0219259	-0.818225	5.18016	0.000192768	1.20057	4.11624e-05	0.818225
Abca2	0.0478232	0.817807	7.15434	0.00019546	-1.15103	4.79068e-05	0.817807
Rpl12	-0.0415693	-0.81758	13.9048	0.000196935	1.16818	1.30544e-07	0.81758
Zfp398	0.0405312	0.816632	4.00341	0.000203185	-1.13942	0.000368759	0.816632
Ddit4	-0.0420949	-0.816468	10.4126	0.000204282	1.08988	4.89323e-05	0.816468
Best3	0.0795137	0.815919	3.88021	0.000207998	-1.85274	0.00135874	0.815919
Psmb4	-0.0362556	-0.815539	13.7348	0.000210598	1.0168	1.75741e-07	0.815539
Pcdhgb1	0.0153736	0.814822	1.65586	0.000215575	-1.47146	0.00444883	0.814822
Atp5l	-0.0344478	-0.814719	10.0472	0.000216303	1.01661	1.60611e-07	0.814719
Xylt1	0.0501537	0.814623	2.4474	0.000216976	-1.81862	0.000106546	0.814623
Cacna1g	0.0315674	0.814607	4.37103	0.000217089	-1.07049	1.07669e-06	0.814607
Zbed6	0.0762633	0.814374	4.78698	0.000218741	-1.69262	0.00176632	0.814374
Gm7609	-0.0106349	-0.813878	1.41266	0.000222279	3.26632	0.00267098	0.813878
Gatad2b	0.0580893	0.813668	4.76402	0.000223798	-1.29664	0.00117855	0.813668
Robo1	0.0389455	0.81358	2.5831	0.000224436	-1.80435	2.28507e-08	0.81358
Fbxl22	-0.0389061	-0.813534	9.13818	0.000224766	1.09652	2.01781e-05	0.813534
Slit3	0.0371269	0.813294	5.85723	0.000226518	-1.11412	2.68917e-08	0.813294
Gpr161	0.0195951	0.813081	1.23318	0.000228072	-2.19442	0.000571362	0.813081
Lcor	0.0483571	0.812924	3.28239	0.000229228	-1.56126	1.23196e-05	0.812924
Usp34	0.0539636	0.812628	7.55089	0.000231421	-1.24969	0.000113363	0.812628
1700029F09Rik	-0.0300498	-0.812342	7.5931	0.000233558	1.0167	4.01018e-06	0.812342
Fat4	0.0461914	0.812338	5.00094	0.000233589	-1.38248	1.21794e-08	0.812338
Myl4	-0.0606929	-0.81172	11.574	0.000238252	1.57247	1.77009e-05	0.81172
Ar	0.0442809	0.811549	5.42801	0.000239559	-1.16146	5.4754e-05	0.811549
Chst11	0.0490602	0.811478	3.67428	0.000240097	-1.50646	1.68287e-05	0.811478
Sgcd	0.0470036	0.811218	6.0495	0.000242101	-1.2118	1.57232e-05	0.811218
Gdap10	0.049426	0.810859	2.6895	0.000244876	-1.58159	0.000901215	0.810859
Tiam1	0.0534829	0.810848	4.36527	0.000244966	-1.44876	3.13465e-05	0.810848
P2ry1	0.035065	0.810716	6.01725	0.000245998	-1.07609	1.99738e-10	0.810716
Adamtsl3	0.0362568	0.810243	4.49462	0.000249713	-1.19694	1.87504e-08	0.810243
Cacng7	0.0500256	0.809709	4.81096	0.000253968	-1.15488	0.00146037	0.809709
LOC100504703	-0.0357658	-0.809545	6.3047	0.000255288	1.58567	1.61093e-05	0.809545
E130008D07Rik	0.0151626	0.8089	0.720694	0.00026052	-2.51003	0.00302177	0.8089
Gm5567	0.0142996	0.808862	1.13613	0.000260838	-1.93044	0.00489289	0.808862
Ddt	-0.0401446	-0.808461	10.4381	0.000264141	1.12605	5.57564e-06	0.808461
Abca9	0.0512486	0.808113	5.17653	0.000267034	-1.46586	3.52882e-07	0.808113
Uap1l1	-0.0361087	-0.807226	9.27137	0.000274536	1.05926	4.57437e-06	0.807226
Impad1	0.0472764	0.807049	8.37287	0.000276052	-1.05384	0.000471513	0.807049
Adcy9	0.0864475	0.806756	4.87562	0.000278576	-1.77748	0.0055486	0.806756
Bmp5	0.046154	0.806437	4.59488	0.000281343	-1.36392	1.30723e-06	0.806437
Npc1	0.0511705	0.806386	8.11141	0.000281793	-1.17124	0.000255696	0.806386
Grhl1	-0.0236441	-0.806317	5.47928	0.000282398	1.01969	0.00144876	0.806317
Lhfpl3	-0.0120961	-0.80604	2.30929	0.00028483	2.14642	0.00387266	0.80604
Atpif1	-0.0369926	-0.80596	10.5481	0.000285532	1.03958	4.14799e-06	0.80596
BC021891	-0.0280951	-0.805933	4.73656	0.000285766	2.21634	1.32172e-06	0.805933
Lrp5	0.0448015	0.805583	7.23086	0.000288879	-1.07659	0.000108315	0.805583
Caly	-0.0235998	-0.805513	4.71312	0.0002895	1.49019	0.0001735	0.805513
Spns2	0.0452383	0.805231	8.44568	0.000292026	-1.0685	0.000184742	0.805231
Rps19	-0.036109	-0.804453	12.218	0.000299096	1.00203	2.4292e-06	0.804453
Irs2	0.0661222	0.804154	4.62299	0.000301841	-1.5143	0.000571417	0.804154
Lhfpl4	-0.0194687	-0.804046	5.2845	0.000302842	1.01485	9.99275e-05	0.804046
Sln	-0.132641	-0.804034	14.3213	0.000302956	4.32713	1.08185e-06	0.804034
Nt5c1a	0.0806766	0.803748	3.21163	0.00030561	-1.86485	0.00560484	0.803748
Plxna1	0.0481405	0.803411	6.4847	0.000308769	-1.20539	3.4963e-05	0.803411
Romo1	-0.0352802	-0.803401	12.3764	0.000308869	1.01523	1.13768e-07	0.803401
Naalad2	0.0336038	0.803254	4.85084	0.000310256	-1.07916	3.94133e-07	0.803254
Mt3	-0.0732991	-0.802311	9.39126	0.000319271	2.93223	1.28309e-12	0.802311
Adamts12	0.0538498	0.801961	2.53158	0.000322663	-2.08361	8.57667e-08	0.801961
Sned1	0.0517821	0.801467	3.38831	0.00032752	-1.37068	0.00187074	0.801467
Sik2	0.0685365	0.801197	3.66894	0.00033019	-1.53686	0.0097786	0.801197
Btbd7	0.0595045	0.800914	4.78739	0.000333016	-1.44059	0.000221669	0.800914
Rps20	-0.0402323	-0.800874	14.1638	0.000333417	1.15359	1.01617e-07	0.800874
Adamts3	0.0217053	0.80083	2.68472	0.000333857	-1.29654	3.89592e-05	0.80083
Spata24	-0.0388651	-0.800723	8.08354	0.000334933	1.34494	1.58325e-07	0.800723
Lynx1	0.0392874	0.800454	9.7054	0.000337645	-1.05245	5.13423e-07	0.800454
Mmp28	0.0354561	0.800437	3.26176	0.000337819	-1.30649	5.97467e-05	0.800437
C7	0.0627415	0.800343	4.34442	0.000338773	-1.91902	1.34705e-09	0.800343
Snx29	0.041081	0.800333	3.89023	0.000338874	-1.16738	0.000633543	0.800333
Ldhal6b	0.014081	0.800331	1.38389	0.000338891	-1.6339	0.00524159	0.800331
Mtr	0.0437731	0.800049	6.33385	0.000341772	-1.06683	0.000183387	0.800049
Fgf6	0.0364048	0.800039	3.17308	0.000341868	-1.33294	9.17534e-05	0.800039
E230016M11Rik	-0.0202207	-0.799977	4.86679	0.000342507	1.05834	0.00163881	0.799977
Creb3l2	0.0549728	0.799903	4.65113	0.00034326	-1.25401	0.0015903	0.799903
Cyyr1	0.067427	0.799826	3.26648	0.000344053	-1.78824	0.00144724	0.799826
Ttll7	0.0573076	0.799772	9.04618	0.000344607	-1.21265	0.00106196	0.799772
Olfr920	-0.0197413	-0.799609	4.16571	0.000346296	1.3152	0.00337735	0.799609
Heg1	0.0636342	0.799588	4.50162	0.000346513	-1.51455	0.000386822	0.799588
Ralgps1	0.0413405	0.799434	2.80835	0.000348101	-1.45454	0.000742839	0.799434
Mgat5	0.0221762	0.799301	1.92918	0.000349484	-1.7248	0.000121221	0.799301
2410066E13Rik	0.04013	0.798924	3.72577	0.00035343	-1.193	0.000573855	0.798924
Fam38a	0.0628574	0.797856	5.17565	0.000364809	-1.44752	0.000480183	0.797856
Fam196b	-0.0274517	-0.797403	6.08862	0.000369722	1.21065	1.1425e-05	0.797403
Col6a6	0.0581771	0.797312	2.88865	0.000370706	-2.16482	3.3844e-11	0.797312
Marveld2	-0.0324297	-0.796981	6.15687	0.000374342	1.43218	4.32734e-05	0.796981
Glis3	0.0135581	0.796965	1.14831	0.000374514	-1.87546	0.00459915	0.796965
Ccdc8	0.0254266	0.796964	2.67903	0.000374532	-1.49547	5.51289e-07	0.796964
Eef1b2	-0.0372651	-0.796608	13.5071	0.000378471	1.04753	1.13596e-06	0.796608
Ror1	0.0364553	0.796289	2.01986	0.000382026	-1.85331	0.000984311	0.796289
Rims4	0.0253032	0.796256	3.2687	0.000382398	-1.02055	0.000697181	0.796256
Il1rl2	0.0370726	0.795984	1.69745	0.000385455	-2.34559	4.26928e-06	0.795984
Epha3	0.032142	0.795777	1.68567	0.000387796	-2.3848	2.14842e-07	0.795777
Ptpn4	0.0563908	0.795739	4.89728	0.000388224	-1.48622	2.71095e-05	0.795739
Snhg11	-0.0327237	-0.795015	6.29977	0.000396517	1.48803	2.14664e-06	0.795015
Gna12	0.0491748	0.79491	6.05854	0.000397733	-1.22157	7.59499e-05	0.79491
Egfr	0.0345436	0.794701	5.52974	0.000400151	-1.07931	4.17739e-08	0.794701
2310001K24Rik	-0.0171546	-0.794625	3.65183	0.00040104	1.484	0.00208507	0.794625
2810029C07Rik	-0.0221903	-0.794461	4.5662	0.000402954	1.28794	0.00238775	0.794461
AA467197	-0.0368674	-0.794291	4.79084	0.000404945	3.58577	2.21213e-06	0.794291
Gm17296	0.059664	0.79425	4.43335	0.000405431	-1.38058	0.00125588	0.79425
Rps27a	-0.0385559	-0.794122	13.3416	0.000406938	1.09043	1.07669e-06	0.794122
Gm221	0.016021	0.794115	1.63146	0.000407019	-1.51449	0.00421781	0.794115
Cst6	-0.0367312	-0.793789	10.9522	0.000410874	1.08365	2.14842e-07	0.793789
Rassf8	0.0606507	0.793273	4.28163	0.000417054	-1.41437	0.00134834	0.793273
1110018J18Rik	0.0433299	0.793103	5.87684	0.0004191	-1.05356	0.0003491	0.793103
Gm7538	-0.0224799	-0.793086	3.57412	0.000419299	2.41803	0.000392956	0.793086
Adra1a	0.0309993	0.792808	3.12098	0.000422676	-1.3291	8.89349e-06	0.792808
Itga4	0.0493003	0.792685	6.04076	0.000424171	-1.12497	0.000912604	0.792685
Arntl	0.0519256	0.792636	5.75187	0.000424768	-1.36669	4.07742e-05	0.792636
Lrp1	0.0355226	0.792333	8.83346	0.000428488	-1.00287	1.63233e-07	0.792333
Map3k13	0.0427208	0.792121	2.61733	0.000431097	-1.50188	0.00180208	0.792121
Uchl1	-0.0706351	-0.791818	10.7121	0.000434862	2.22249	3.30758e-07	0.791818
Poln	-0.0188414	-0.791733	3.57501	0.000435919	1.67481	0.0024479	0.791733
Gan	0.0321349	0.791564	2.96483	0.000438023	-1.34314	0.000103784	0.791564
Fhit	-0.0315429	-0.791136	5.79007	0.000443416	1.4881	0.000164983	0.791136
Slc36a4	0.0349232	0.790789	2.38407	0.000447827	-1.54161	0.0035918	0.790789
Myh10	0.0442771	0.790384	6.5476	0.000453016	-1.13857	3.05934e-05	0.790384
Lgi2	0.0367553	0.790042	2.43174	0.000457429	-1.99734	5.84426e-11	0.790042
Scara5	0.0360965	0.789704	6.49333	0.00046183	-1.09383	4.44178e-08	0.789704
Cstb	-0.0385062	-0.789427	9.48336	0.00046546	1.1554	7.74367e-06	0.789427
Bola2	-0.0386663	-0.789385	10.1937	0.000466012	1.13499	1.65311e-06	0.789385
Eif4ebp2	0.0678321	0.78935	6.97549	0.000466477	-1.34905	0.00983963	0.78935
Megf6	0.0229313	0.789264	3.30243	0.00046761	-1.05374	5.96642e-05	0.789264
A530013C23Rik	-0.0336199	-0.789085	8.1144	0.000469977	1.11728	3.75768e-06	0.789085
Uhmk1	0.0530559	0.78865	3.71936	0.000475783	-1.34332	0.00218536	0.78865
Pcdh12	0.044907	0.7886	4.68751	0.000476449	-1.27333	2.34768e-05	0.7886
Rpl38	-0.0402751	-0.788389	12.055	0.000479291	1.16717	6.167e-07	0.788389
Lyst	0.0526014	0.788375	3.66397	0.00047948	-1.39634	0.00106976	0.788375
Plce1	0.0313416	0.788177	4.83981	0.000482153	-1.04181	2.30176e-07	0.788177
Dbf4	-0.0299313	-0.78778	5.65921	0.000487551	1.48938	9.53283e-05	0.78778
Wnk2	0.0447837	0.78691	9.09678	0.000499562	-1.04024	0.000329488	0.78691
Huwe1	0.0452963	0.786682	9.87114	0.000502752	-1.03379	0.000465616	0.786682
Ppp1r12b	0.0781745	0.786554	6.44154	0.00050454	-1.57532	0.00762544	0.786554
Prdm10	0.0451098	0.786533	2.85462	0.00050483	-1.4049	0.0048083	0.786533
Immp2l	-0.0342619	-0.786524	8.696	0.000504965	1.04376	1.6311e-05	0.786524
Spred2	0.0563944	0.786254	3.80644	0.000508772	-1.38713	0.00230971	0.786254
2310016D03Rik	0.0449422	0.786122	4.54028	0.000510641	-1.23043	0.00015155	0.786122
Rpl36a	-0.0378512	-0.785801	12.2001	0.000515214	1.06738	4.62652e-06	0.785801
Gpr133	0.042568	0.785452	4.4918	0.000520221	-1.42186	7.8324e-09	0.785452
Npnt	0.0550158	0.785275	4.2073	0.000522772	-1.46962	0.000250435	0.785275
Cdkl5	0.0252036	0.785186	1.69006	0.000524059	-2.12491	2.87945e-05	0.785186
Palld	0.0496773	0.785134	6.79514	0.000524813	-1.1726	0.000273543	0.785134
Rab13	-0.0406599	-0.784367	9.8548	0.000536045	1.19244	9.84341e-06	0.784367
Ctxn3	-0.0428444	-0.78435	12.1878	0.000536295	1.27295	3.44813e-08	0.78435
Rgag1	0.0122112	0.784088	0.645774	0.000540176	-2.44116	0.004837	0.784088
Cyp1a1	-0.0312846	-0.783692	6.79316	0.000546087	1.21147	1.03998e-05	0.783692
Cit	0.0261193	0.783654	2.54083	0.000546655	-1.34264	0.000602357	0.783654
BC068281	0.0379291	0.783533	4.22472	0.000548475	-1.08403	0.000540355	0.783533
Tnnt2	-0.0463987	-0.782804	9.27796	0.000559532	1.2925	0.000165096	0.782804
Glul	-0.0429804	-0.782576	14.3713	0.000563025	1.17096	1.12038e-05	0.782576
Etohi1	0.0504203	0.782396	5.55666	0.000565795	-1.16268	0.00112209	0.782396
2010107G23Rik	-0.0292028	-0.781774	7.08368	0.000575448	1.09178	2.87644e-06	0.781774
Cth	-0.0299353	-0.781688	7.4233	0.000576801	1.03729	4.57437e-06	0.781688
Trappc6a	-0.0489945	-0.781631	8.43948	0.000577703	1.65015	7.3611e-06	0.781631
Dbndd1	0.0429618	0.781305	3.01918	0.000582826	-1.34414	0.00505537	0.781305
Frem1	0.0227874	0.780585	2.82559	0.000594291	-1.21371	0.00013979	0.780585
Col4a3	0.0298603	0.779758	4.0303	0.000607689	-1.08141	7.96159e-06	0.779758
Ccdc122	-0.0340867	-0.779672	7.82502	0.000609112	1.17866	1.47628e-06	0.779672
Slfn3	0.0256979	0.779483	2.28824	0.000612211	-1.5193	0.000334301	0.779483
Hmgb2	-0.0318377	-0.77948	7.92413	0.000612261	1.0183	6.25757e-05	0.77948
Cebpb	-0.0379346	-0.778444	12.5165	0.000629486	1.06251	1.12142e-05	0.778444
Wnt5a	0.033951	0.778272	4.71323	0.000632385	-1.04301	3.1841e-05	0.778272
Vps13d	0.0583155	0.778173	7.50292	0.000634064	-1.31143	0.000530017	0.778173
Rps13	-0.0355016	-0.777859	13.1762	0.000639401	1.01696	2.02694e-06	0.777859
Gm2694	-0.0140259	-0.777737	2.4714	0.000641475	3.01735	0.000532135	0.777737
Atp2b3	0.0457844	0.777605	5.58737	0.000643744	-1.08498	0.0011209	0.777605
Rpl41	-0.0370246	-0.777193	13.308	0.000650822	1.0353	8.16355e-06	0.777193
Ccdc88c	0.0543878	0.777111	6.74735	0.000652239	-1.2748	0.000303931	0.777111
AI506816	0.0385701	0.776162	2.62711	0.00066885	-1.3803	0.00835398	0.776162
Fau	-0.0392369	-0.776031	13.1137	0.000671175	1.11928	3.19385e-06	0.776031
C1galt1	0.0532909	0.775997	4.8632	0.000671769	-1.22958	0.00204126	0.775997
Tbck	0.0551213	0.775186	3.89245	0.000686281	-1.37859	0.00194864	0.775186
Asb18	0.0619137	0.775161	4.33998	0.000686741	-1.46004	0.00125316	0.775161
Snhg3	-0.0396914	-0.775145	9.70644	0.000687019	1.14917	2.34768e-05	0.775145
Scn4a	0.0513783	0.775028	10.8021	0.000689133	-1.10881	0.00140403	0.775028
Id1	-0.0377291	-0.774604	10.0975	0.000696853	1.06583	3.66828e-05	0.774604
Scg5	-0.0134906	-0.77459	2.20253	0.000697108	2.73735	0.00293627	0.77459
Map3k3	0.0432373	0.773883	6.98355	0.000710121	-1.03221	0.000422248	0.773883
Tnxb	0.0341617	0.773858	8.4456	0.000710601	-1.02163	1.7727e-08	0.773858
Nme5	-0.0202974	-0.773775	4.79494	0.000712127	1.06896	0.00329881	0.773775
Otog	0.0487537	0.773649	3.37163	0.000714487	-1.53312	0.000195135	0.773649
Tmsb15b1	-0.0159487	-0.773468	3.67312	0.000717869	1.22959	0.00857129	0.773468
Gpld1	0.055858	0.773434	6.06208	0.000718491	-1.25942	0.000998752	0.773434
Fam129a	0.0426432	0.773054	5.47767	0.00072564	-1.13724	0.000100374	0.773054
Rps12	-0.0374991	-0.771576	13.4716	0.000754005	1.06526	6.35913e-06	0.771576
Slc25a30	0.0520077	0.771559	3.46332	0.000754323	-1.63179	7.30004e-05	0.771559
Plekho1	-0.0374476	-0.771114	10.8495	0.000763039	1.02829	3.13281e-05	0.771114
Rasd1	-0.0283885	-0.770825	5.95411	0.000768751	1.1555	0.00117322	0.770825
Nudt17	-0.0239136	-0.770211	4.88828	0.000780983	1.40442	0.000449476	0.770211
Prelid2	-0.0187772	-0.770041	3.9773	0.000784385	1.38461	0.00303482	0.770041
Scd2	0.0351862	0.769782	7.18923	0.000789621	-1.03416	6.82586e-07	0.769782
Prkcz	-0.0519157	-0.769569	8.95605	0.000793936	1.87178	3.31045e-09	0.769569
Prox1	0.0195942	0.769269	2.02435	0.00080005	-1.49745	0.000992755	0.769269
Prima1	0.0505429	0.769072	2.44904	0.000804079	-1.87114	0.000233163	0.769072
Col4a2	0.0487146	0.768931	8.60039	0.000806976	-1.28698	7.52616e-06	0.768931
Trim14	0.0205593	0.768708	2.47064	0.000811579	-1.22585	0.00144784	0.768708
1700011I03Rik	-0.0321279	-0.768157	5.26959	0.000823039	2.11628	5.5415e-06	0.768157
Ankrd52	0.0633298	0.767869	7.11211	0.000829087	-1.37818	0.00106879	0.767869
Cmklr1	0.0386356	0.767803	4.62204	0.000830474	-1.16301	4.79588e-05	0.767803
D630003M21Rik	0.0268743	0.766533	4.12973	0.000857579	-1.02863	2.16593e-06	0.766533
Flrt1	0.0408467	0.766109	4.1949	0.000866795	-1.24248	0.000110944	0.766109
Gdf5	-0.0681905	-0.765794	8.37545	0.000873674	3.26258	3.00662e-11	0.765794
Bcl9	0.0381378	0.76565	4.24494	0.000876843	-1.05746	0.00155623	0.76565
Rps21	-0.0391495	-0.765382	13.5981	0.000882763	1.12504	4.13583e-06	0.765382
Pkd1	0.0553001	0.765042	6.63559	0.000890325	-1.27334	0.000658422	0.765042
Ubxn11	-0.0245186	-0.764594	5.94113	0.000900342	1.06521	0.000196969	0.764594
Wnt5b	-0.0309845	-0.764124	7.86828	0.000910976	1.05373	1.44679e-06	0.764124
Ndst1	0.05196	0.764096	7.54443	0.000911611	-1.16164	0.00108992	0.764096
Nup98	0.0471853	0.763973	5.80767	0.000914421	-1.05461	0.00294504	0.763973
Scx	-0.0343982	-0.762932	9.40764	0.000938382	1.07953	1.42154e-06	0.762932
Rgs9bp	0.0328988	0.762708	2.64055	0.0009436	-1.60406	2.09469e-05	0.762708
5330437I02Rik	0.0433809	0.762557	3.45298	0.000947129	-1.48126	6.97879e-05	0.762557
Vps13c	0.0658057	0.762276	6.24302	0.000953739	-1.40004	0.00751569	0.762276
C3	0.0421028	0.762222	8.24388	0.000955018	-1.13368	2.46447e-05	0.762222
2310009B15Rik	-0.0334559	-0.762089	9.03484	0.000958154	1.01097	3.05934e-05	0.762089
BC051142	-0.0243307	-0.76153	4.01225	0.000971456	2.46217	2.77004e-05	0.76153
Hsf2bp	-0.0355911	-0.76098	5.2244	0.000984685	2.56515	1.0072e-05	0.76098
Rpl39	-0.0375158	-0.760934	11.1323	0.000985801	1.07143	2.244e-05	0.760934
Sox9	-0.0365847	-0.760755	7.80751	0.000990147	1.23698	4.99601e-05	0.760755
Gdf15	-0.0162612	-0.760545	2.79219	0.000995259	2.13216	0.0041707	0.760545
Pkhd1l1	0.0178075	0.760022	2.05335	0.00100807	-1.4084	0.00173761	0.760022
Rcor1	0.0491592	0.760005	4.24917	0.00100849	-1.19362	0.00402064	0.760005
0610040B10Rik	-0.0255394	-0.759879	5.92279	0.00101162	1.05488	0.000966946	0.759879
Evi5l	0.0547242	0.759615	4.18741	0.00101816	-1.3111	0.00342937	0.759615
Pds5a	0.0519894	0.759495	6.44502	0.00102114	-1.1729	0.00141881	0.759495
Gm4013	-0.0150599	-0.759287	3.67503	0.00102633	1.38909	0.00148081	0.759287
Cpne2	-0.0609784	-0.759134	12.0387	0.00103016	1.80592	3.63939e-06	0.759134
Fbxl18	0.0494371	0.759117	3.83837	0.0010306	-1.28307	0.00308305	0.759117
Strn	0.051949	0.758168	4.11679	0.00105462	-1.2008	0.00760118	0.758168
Fat1	0.0372517	0.758084	4.67942	0.00105677	-1.18672	9.907e-06	0.758084
Gm16576	0.0401297	0.758068	5.48036	0.00105719	-1.02133	0.000824333	0.758068
4833403I15Rik	0.0402093	0.757967	3.29839	0.00105978	-1.35216	0.000702999	0.757967
Vwa3a	0.0265984	0.757462	3.1686	0.00107281	-1.18408	0.000132227	0.757462
Fads2	0.0280584	0.756545	3.61859	0.00109681	-1.04452	0.000404007	0.756545
Cyp2u1	0.0351833	0.755507	4.72332	0.00112448	-1.02604	0.0003078	0.755507
Fbxo48	0.00997775	0.755425	0.669129	0.00112669	-2.57941	0.00298057	0.755425
B3gnt9-ps	0.0265531	0.754855	3.87836	0.00114215	-1.05675	3.04631e-05	0.754855
Odz4	0.0242498	0.754726	2.37853	0.00114565	-1.52085	0.00011288	0.754726
Fbp1	-0.0075648	-0.75436	1.00173	0.0011557	2.97399	0.00679707	0.75436
Tnnc1	-0.0377497	-0.7531	8.06223	0.00119082	1.17482	0.00028086	0.7531
Slc17a8	-0.0140232	-0.752784	2.29072	0.00119977	2.83634	0.00211554	0.752784
Car1	-0.0190617	-0.752441	4.78036	0.00120953	1.06092	0.00174218	0.752441
Zfp369	0.0418499	0.752438	2.74176	0.0012096	-1.51915	0.00217776	0.752438
Tppp2	-0.0170647	-0.751535	4.35797	0.00123563	1.09387	0.0029539	0.751535
Xrn1	0.0474894	0.751197	5.15794	0.0012455	-1.09838	0.00355636	0.751197
H2-K1	-0.0370503	-0.750732	13.3773	0.00125915	1.07169	7.03373e-06	0.750732
1700011J10Rik	-0.029548	-0.750507	6.21057	0.00126579	1.17657	0.000889753	0.750507
Id2	-0.0363481	-0.750302	8.71728	0.00127189	1.10013	0.00012968	0.750302
Il1r1	0.0375157	0.749635	5.86384	0.00129185	-1.09104	8.11082e-05	0.749635
Cidea	-0.0375968	-0.749409	6.35457	0.00129867	1.75951	3.05591e-05	0.749409
Ostn	-0.0411387	-0.749052	10.2172	0.00130952	1.2615	2.10359e-06	0.749052
Stmn1	-0.0373501	-0.748647	6.04578	0.00132189	1.74719	0.00034262	0.748647
Rps14	-0.0360822	-0.748545	14.155	0.00132503	1.02582	2.23353e-05	0.748545
Bmp8a	0.0340285	0.747626	1.73772	0.00135354	-1.9525	0.00185583	0.747626
Klhl28	0.042937	0.746158	4.53976	0.00140009	-1.03248	0.00688515	0.746158
Pnmt	-0.0246478	-0.746046	5.81246	0.0014037	1.11592	0.000247546	0.746046
Itga6	0.0493113	0.745986	6.16931	0.00140561	-1.10859	0.00272311	0.745986
S100a13	-0.0379113	-0.745843	9.71955	0.00141025	1.07862	0.000177983	0.745843
Hist1h1b	0.0100018	0.745441	0.736824	0.00142327	-2.14816	0.00901724	0.745441
Mob1a	0.0509027	0.745221	3.93653	0.00143048	-1.27292	0.00578835	0.745221
2610019E17Rik	-0.0190216	-0.744573	4.15575	0.00145178	1.20118	0.00983794	0.744573
Calml4	-0.0413716	-0.744264	6.55731	0.00146205	1.79359	0.000165843	0.744264
Dpysl5	0.0229399	0.744142	2.86079	0.00146612	-1.12242	0.00150951	0.744142
Gm14827	0.0174776	0.742941	1.71827	0.00150663	-1.68315	0.000817263	0.742941
1810027O10Rik	-0.0360463	-0.742735	11.2856	0.00151367	1.02274	6.03428e-05	0.742735
Col4a1	0.0458915	0.742006	9.08626	0.0015388	-1.23453	2.78762e-05	0.742006
Klhdc8a	-0.0378849	-0.741978	5.93925	0.00153977	1.82203	0.000615774	0.741978
Nhlrc3	0.0319959	0.740899	3.30671	0.00157756	-1.21898	0.000767695	0.740899
Fxyd7	-0.0267561	-0.73992	5.89166	0.00161251	1.11105	0.00180031	0.73992
C130083M11Rik	0.0421328	0.739332	3.69016	0.00163381	-1.19275	0.0050971	0.739332
Fam5b	0.0165	0.739061	2.1773	0.0016437	-1.25155	0.00360211	0.739061
Lrrtm2	-0.0153374	-0.739001	3.02623	0.00164592	1.90986	0.00230558	0.739001
Zap70	-0.0282861	-0.738885	5.26223	0.00165018	1.68084	6.71317e-05	0.738885
Med12	0.0484741	0.738719	6.79114	0.00165627	-1.08383	0.00278978	0.738719
Lgals3	-0.066127	-0.738405	11.1176	0.00166784	2.06212	0.000171906	0.738405
Ttc9	-0.0534589	-0.738239	10.1493	0.00167401	1.54602	0.000119911	0.738239
Gdf11	0.0403142	0.737989	4.46099	0.00168332	-1.08571	0.00279017	0.737989
Tspan18	0.0305101	0.737967	3.98459	0.00168413	-1.12006	4.07742e-05	0.737967
Svep1	0.0356062	0.737266	5.82135	0.00171043	-1.14658	2.72349e-07	0.737266
Irf7	-0.0372737	-0.736776	8.62535	0.00172905	1.17849	3.82282e-05	0.736776
Rgs5	0.05641	0.736766	8.10716	0.00172942	-1.2255	0.00244824	0.736766
Fcer2a	0.0147102	0.735669	1.5239	0.00177164	-1.71527	0.00218676	0.735669
Ctla2a	-0.0408115	-0.735419	9.96236	0.00178137	1.2639	2.26408e-05	0.735419
8030462N17Rik	0.0490076	0.734885	6.25156	0.00180232	-1.0901	0.00374555	0.734885
Btbd8	0.0300134	0.734471	2.23355	0.00181866	-1.80452	0.000173319	0.734471
1190005I06Rik	-0.0227117	-0.733994	5.2359	0.00183767	1.10302	0.00224928	0.733994
Mpv17l	-0.0205909	-0.732523	5.23096	0.0018973	1.05722	0.000891785	0.732523
Nid1	0.0403491	0.732219	8.09347	0.00190982	-1.2043	1.19648e-06	0.732219
Hist1h4h	-0.0349206	-0.731858	9.62036	0.00192475	1.0351	6.6845e-05	0.731858
Loxl4	0.0250236	0.731124	3.54892	0.00195543	-1.02638	0.000479374	0.731124
Padi1	-0.0199656	-0.730918	3.31969	0.00196415	2.72336	0.000192442	0.730918
Baiap3	-0.0144757	-0.730796	3.39315	0.00196928	1.55882	0.00179046	0.730796
Foxq1	-0.0158589	-0.730292	3.27626	0.00199069	1.88442	0.00100326	0.730292
Accn1	-0.0159109	-0.730258	3.41042	0.00199213	1.44962	0.00782949	0.730258
Dchs1	0.0391118	0.7298	5.03976	0.00201178	-1.05633	0.00106809	0.7298
Fam78b	0.0272249	0.729002	3.90252	0.00204635	-1.08989	2.27507e-05	0.729002
Fam46c	0.0256137	0.728561	2.70367	0.00206569	-1.36432	0.000335443	0.728561
1700012D01Rik	-0.0204866	-0.728288	4.67114	0.00207769	1.26394	0.00109317	0.728288
Itih5	0.0372816	0.728254	7.07478	0.00207919	-1.12446	3.08038e-06	0.728254
Gm10549	0.0148143	0.727873	1.9585	0.00209609	-1.25495	0.00777624	0.727873
2410006H16Rik	-0.034911	-0.727492	8.93529	0.00211307	1.08998	6.85985e-05	0.727492
Atf3	-0.0376214	-0.727313	8.6814	0.00212111	1.01092	0.00286617	0.727313
Zfp526	0.0461651	0.726839	4.04839	0.00214248	-1.15377	0.00915675	0.726839
Chrna9	-0.0261819	-0.726719	4.51245	0.00214793	1.86101	0.000658151	0.726719
Tuba1b	-0.0353596	-0.726711	8.74783	0.00214831	1.05777	0.000584104	0.726711
Pax7	0.0403473	0.726313	2.91273	0.00216639	-1.60409	0.000786393	0.726313
Tmem178	-0.0221102	-0.725745	5.44931	0.00219248	1.12113	0.000269349	0.725745
Dgkh	0.0241793	0.725662	3.40608	0.00219629	-1.01615	0.00100757	0.725662
Leprel1	0.0328375	0.725256	2.85345	0.00221511	-1.40317	0.00148199	0.725256
Siglec1	0.0271552	0.724633	3.17471	0.00224424	-1.18192	0.000610432	0.724633
Btnl9	0.0328647	0.724552	3.90925	0.00224801	-1.03243	0.00324648	0.724552
2210009G21Rik	0.0386633	0.724448	3.22025	0.00225291	-1.32486	0.00288228	0.724448
Ppl	0.0346328	0.721271	5.0991	0.00240669	-1.04252	0.000228199	0.721271
Ppp1r1a	-0.0513745	-0.720675	12.4426	0.00243646	1.59812	2.32225e-06	0.720675
Ptafr	0.020414	0.720602	2.70583	0.00244012	-1.1053	0.00342157	0.720602
Tecta	0.0230051	0.720534	3.02791	0.00244354	-1.03977	0.00376998	0.720534
Kcnd3	-0.021803	-0.720268	3.93279	0.00245696	2.15065	0.000157318	0.720268
Lhx6	0.0274257	0.719825	3.93681	0.0024794	-1.06503	6.19154e-05	0.719825
Gm4841	-0.0698903	-0.719242	11.5207	0.00250922	2.07813	0.000237008	0.719242
Spc24	-0.0282376	-0.719125	6.99356	0.00251522	1.03017	0.000413886	0.719125
Arhgef11	0.0540407	0.718445	6.07953	0.00255041	-1.20001	0.00449638	0.718445
Rrad	-0.0914446	-0.718254	12.3879	0.00256037	2.991	9.71737e-06	0.718254
D330050I16Rik	-0.0245252	-0.717945	5.11496	0.00257657	1.44691	0.000256752	0.717945
Igsf9b	0.0142628	0.717824	0.968083	0.00258291	-2.20865	0.00363388	0.717824
Gm5113	0.0491051	0.717359	4.69378	0.00260747	-1.26838	0.0020155	0.717359
Nbeal1	0.0471697	0.716672	6.11576	0.00264407	-1.20831	0.000590032	0.716672
Thrsp	-0.0403369	-0.716607	10.2679	0.00264752	1.06718	0.00120221	0.716607
Hspb7	-0.0464118	-0.716083	15.4141	0.00267575	1.3492	2.50524e-05	0.716083
Papln	0.0461321	0.715933	2.58236	0.00268385	-1.74154	0.0015548	0.715933
Rps19-ps3	-0.0218487	-0.715618	4.58521	0.00270099	1.33	0.00358407	0.715618
Prelp	0.0365605	0.715485	7.50295	0.00270825	-1.09147	4.21047e-06	0.715485
Otos	-0.0152767	-0.715479	2.54746	0.00270856	2.74181	0.00340657	0.715479
Tubgcp6	0.0481121	0.715071	5.45791	0.00273093	-1.09209	0.00656262	0.715071
Il6	-0.0120421	-0.714711	2.5665	0.0027508	1.74695	0.00865431	0.714711
Zfp382	0.0147172	0.714676	2.42139	0.00275272	-1.11518	0.00374125	0.714676
Rrm2	-0.0345175	-0.713581	6.62058	0.00281386	1.36236	0.000731237	0.713581
Fbn1	0.0496082	0.713572	7.0346	0.00281433	-1.54364	6.11995e-07	0.713572
Fam110a	-0.0335629	-0.713545	8.00342	0.00281587	1.07216	0.000565848	0.713545
2810032G03Rik	-0.0291134	-0.712545	5.39688	0.00287267	1.75653	3.74707e-05	0.712545
Gck	0.0326867	0.71163	5.04429	0.00292539	-1.04843	8.30156e-05	0.71163
Gdnf	-0.0350865	-0.711569	7.02057	0.00292899	1.51023	3.42152e-06	0.711569
Nphp4	0.0147357	0.71096	1.91655	0.00296455	-1.34238	0.00592464	0.71096
Gm16982	0.0111378	0.710935	0.764326	0.00296599	-2.2838	0.0069264	0.710935
Sacs	0.0324291	0.710904	2.85683	0.00296781	-1.59143	1.44785e-05	0.710904
3110003A17Rik	-0.0340649	-0.710523	7.25783	0.0029903	1.21169	0.000620378	0.710523
Creb5	0.020852	0.71024	2.93379	0.00300704	-1.15945	0.000481768	0.71024
Tead4	0.0519384	0.708972	4.68613	0.00308311	-1.19811	0.00893762	0.708972
1110002L01Rik	0.0297977	0.708721	3.49916	0.00309833	-1.13104	0.00125316	0.708721
Rybp	0.0311486	0.708061	3.92203	0.00313865	-1.00401	0.00390481	0.708061
Arsi	0.0281852	0.707811	3.10757	0.00315406	-1.36605	4.68251e-05	0.707811
Lnpep	0.0482114	0.705972	5.88213	0.00326911	-1.07086	0.00788265	0.705972
Olfr1372-ps1	-0.0171189	-0.705813	4.40847	0.00327921	1.19039	0.00113677	0.705813
Prap1	0.0142669	0.705772	1.08732	0.00328181	-2.51258	0.000480183	0.705772
Treml1	-0.0143483	-0.705329	2.50953	0.00331016	2.31415	0.00528425	0.705329
Sufu	0.0407258	0.705324	4.11439	0.00331044	-1.12217	0.00633946	0.705324
Lrrn3	-0.0168031	-0.705231	4.26257	0.00331644	1.19179	0.00225986	0.705231
Cited1	-0.0317628	-0.702865	4.984	0.00347113	2.09941	0.000742302	0.702865
2010300C02Rik	-0.0367186	-0.70192	7.51494	0.00353446	1.57252	1.01892e-07	0.70192
Fat3	0.0412631	0.701788	4.03798	0.0035434	-1.269	0.00155836	0.701788
Cda	-0.0213957	-0.701169	5.05007	0.00358552	1.04101	0.0083597	0.701169
Myog	-0.061884	-0.701151	9.90792	0.00358671	2.09589	1.0357e-05	0.701151
9130404H23Rik	0.0303958	0.699198	0.50781	0.00372215	-4.51201	3.34747e-05	0.699198
Pcbd1	-0.0237621	-0.69856	4.33031	0.0037673	1.6765	0.00740404	0.69856
Sorcs1	0.0160825	0.69732	2.96868	0.00385625	-1.01266	0.00135874	0.69732
Plaur	-0.0349595	-0.697294	6.64108	0.00385812	1.43239	0.000647154	0.697294
Upp1	-0.021386	-0.697034	4.65859	0.00387696	1.16777	0.00943894	0.697034
4930558C23Rik	-0.00871721	-0.695681	0.762106	0.00397633	3.66331	0.00745329	0.695681
Msln	-0.0365374	-0.695524	5.9127	0.00398798	1.9269	0.000187899	0.695524
4930579G18Rik	0.0302104	0.6954	3.42719	0.00399726	-1.07937	0.00774997	0.6954

## Sheet: eTable S23 6m-284 DEGS vs. TA
gene_id	slope	R	intercept	pval	log2FoldChange	padj	|R|
Ak4	-0.0602385	-0.745671	9.89256	0.00220114	1.47575	1.1523e-20	0.745671
Erc2	-0.0918414	-0.720772	9.76501	0.00363232	3.40783	6.90273e-24	0.720772			eTable S24 6m-24m DEGS vs. TA. DEGs (|log2fc|≥1, padj<0.05) from 6m to 28m regressed against the TA mass, Top 30 DEGs ranked by|R|.
Car3	-0.0559946	-0.69683	19.4803	0.00561635	1.05391	0.000567828	0.69683
Ostn	-0.0641363	-0.686979	11.9793	0.0066431	1.38078	4.18654e-06	0.686979			KEY: m= months of age; slope, R2, R, Intercept, and pval from linear regression of the gene's expression with CFAB,
Snhg11	-0.0462452	-0.678049	7.15867	0.00769485	1.74094	1.79625e-11	0.678049
Scamp5	-0.0567064	-0.66177	8.99167	0.00993992	1.31318	0.00953877	0.66177
1700001O22Rik	0.0789073	0.647448	3.89781	0.012305	-1.58706	0.00627717	0.647448
Spp1	-0.133569	-0.642029	13.6583	0.0133044	3.36805	1.60838e-05	0.642029
Foxq1	-0.0284639	-0.637585	4.1298	0.0141693	2.23981	0.00709061	0.637585
BC021891	-0.038958	-0.62481	5.88847	0.0168954	1.96365	2.26759e-05	0.62481
Tmem8	-0.046753	-0.594014	8.49435	0.0250977	1.2928	0.00158281	0.594014
Cyr61	-0.0469842	-0.582342	12.945	0.0288805	1.13532	6.967e-05	0.582342
9130404H23Rik	0.0426479	0.580121	0.453949	0.029646	-2.87098	0.00385109	0.580121
Prkcz	-0.0484645	-0.568095	8.9034	0.0340556	1.38026	0.000215857	0.568095
Gck	0.0488915	0.549114	4.07293	0.0419784	-1.40397	1.60838e-05	0.549114
2010300C02Rik	-0.0311847	-0.536267	7.28946	0.0480574	1.03208	0.00137367	0.536267
Ly6g6e	0.0272643	0.529342	2.32517	0.0515882	-1.59597	3.08432e-05	0.529342
Oprd1	-0.0259358	-0.52875	3.76314	0.0518987	3.02119	0.00176353	0.52875
Tlr2	-0.0475837	-0.517551	8.48995	0.0580272	1.45724	0.00385109	0.517551
Timp1	-0.097667	-0.517534	10.5546	0.0580366	2.91657	0.00627717	0.517534
Ckap2	-0.0525655	-0.497766	6.54609	0.0701011	2.81829	0.00239297	0.497766
2410137F16Rik	-0.107003	-0.495578	12.4653	0.0715379	3.65289	3.42965e-06	0.495578
Cxcl10	-0.0782515	-0.488496	9.30461	0.0763322	2.98848	0.000530653	0.488496
Rrm2	-0.051491	-0.478705	7.99011	0.083328	1.82008	0.00573486	0.478705
4933415F23Rik	-0.0518399	-0.467685	7.82409	0.0917276	2.09003	0.00092374	0.467685
Sik1	-0.059547	-0.460382	12.321	0.0976088	1.61535	0.00627021	0.460382
Dnase1l3	-0.0329727	-0.460156	5.17079	0.0977949	2.39235	0.00104124	0.460156
Zmynd17	-0.0352534	-0.449704	13.1143	0.10667	1.08852	0.000163712	0.449704
Depdc7	-0.0344345	-0.449457	8.33509	0.106887	1.13397	0.00999172	0.449457
Arhgdig	-0.0725688	-0.441148	8.64918	0.114336	3.08036	0.00126058	0.441148
