# Supplementary material for: Skeletal Muscle Transcriptome Alterations Related to Declining Physical Function in Older Mice
Source: J Ageing Longev. Author manuscript; Available in PMC 2023 Oct 24. (PMC10597580; doi:10.3390/jal3020013)
Supplement: JAL3020013 Supplementary Material [file NIHMS1905574-supplement-JAL3020013__Supplementary_Material.zip › eTable S25 ChEA Transcription Factor Analysis of DEGs Highly Associated with CFAB.xlsx]

## Sheet: eTable 25
Term	Overlap	P-value	padj	Odds Ratio	Combined Score	Genes
WT1 25993318 ChIP-Seq PODOCYTE Human	100/2909	3.06149e-10	2.27775e-07	2.2013	48.2238	SEMA5A;SCX;XYLT1;FADS2;DPYSL5;RAVER2;EP300;NUDT16;BAHCC1;IER3;RPS12;EBF2;TIAM1;COL4A2;DAAM2;COL4A1;WDFY3;ROR1;CTXN3;FREM1;NECAB1;NOTCH3;CACNA1C;PRKCZ;CACNA1G;PDZD2;HIVEP1;ARSI;PLXNA1;TNRC18;TRPM3;SLC10A6;DENND4C;NR1D1;FOXN3;SSH1;PPP1R1A;GDNF;CCDC88C;ID1;ITGA11;CYP1A1;PDE3A;FAT3;RPS20;DCHS1;FAT4;CCDC122;DAGLA;BMPR2;DYRK2;MAST4;STON1;LAMC1;PCSK6;LYST;ROBO1;SPRED2;ARL5B;ADAMTSL3;SUFU;PSD3;EDN3;DST;D…
MTF2 20144788 ChIP-Seq MESCs Mouse	79/2488	1.06971e-06	0.000351434	1.92722	26.4956	MRS2;RET;SEMA5A;KCNG4;DAGLA;BMPR2;DYRK2;DOCK3;LAMC3;POGK;ADRA1A;GRM1;C1QTNF4;LGALS3;ADAMTS3;RAVER2;KDR;PDE4A;BAHCC1;RPS12;EDN3;TESC;HEG1;WNT5A;DNMT3A;ITGA1;EBF2;SORCS1;RTN4RL2;PROX1;PCDHGA9;AR;COL4A2;DAAM2;SOAT2;MMP15;PAX7;COL4A1;RGS9BP;COL4A4;COL4A3;ROR1;FBP1;SAMD5;NECAB1;CEBPB;COL15A1;CEBPD;NTN4;CACNA1G;ARHGAP20;BTAF1;UAP1L1;P2RY1;HIVEP1;ARSI;TNRC18;GABRD;MFAP3L;SPEN;ACE;LGI2;DCLK3;LHFPL4;LHFPL…
CEBPD 23245923 ChIP-Seq MEFs Mouse	20/413	0.000102566	0.00493168	2.78091	25.5427	USP24;CDK19;MBD5;BMPR2;NHLRC3;MME;CRYBG3;LAMC3;HEG1;NBEAL1;SORCS1;LAMC1;BICC1;BTAF1;PALLD;PSD3;REL;FAT1;WDFY3;TRPM3
SUZ12 18692474 ChIP-Seq MEFs Mouse	39/1019	1.65862e-05	0.00205669	2.22857	24.5298	RET;COL15A1;POGK;NTN4;CACNA1C;ADRA1A;GRM1;CACNA1G;C1QTNF4;LGALS3;SGCD;DPYSL5;P2RY1;KDR;PDE4A;NOS1;GABRD;MFAP3L;ACE;EDN3;TESC;WNT5A;EBF2;PROX1;GADD45G;HIPK2;AR;PDE10A;COL4A2;GDNF;MMP15;PAX7;COL4A1;ID1;PDE3A;FXYD7;LHX6;ROR1;FBP1
SUZ12 20075857 ChIP-Seq MESCs Mouse	104/3611	1.41707e-06	0.000351434	1.78384	24.0228	SEMA5A;KCNG4;POGK;SCX;XYLT1;LGALS3;DPYSL5;KDR;NUDT16;BAHCC1;WNT5A;EBF2;AR;CYP2U1;COL4A2;DAAM2;COL4A1;RGS9BP;COL4A4;COL4A3;ROR1;NOTCH3;CACNA1G;GOLGA7B;ARHGAP20;UAP1L1;INPP5J;HIVEP1;ARSI;PLXNA1;TNRC18;KIF3C;MFAP3L;ABCA2;ACE;AUTS2;DCLK3;GADD45G;PCDHGA11;GDNF;ITGA11;CYP1A1;REL;PDE3A;FXYD7;LHX6;DCHS1;FAT4;MRS2;RET;CCDC122;DAGLA;DOCK3;MAST4;LAMC3;HSPB3;PCSK6;LYST;ADRA1A;GRM1;C1QTNF4;ADAMTS3;PDE4A;NOS1;…
SUZ12 18692474 ChIP-Seq MESCs Mouse	53/1531	8.38964e-06	0.00129257	2.04027	23.8477	RET;DOCK3;POGK;ADRA1A;GRM1;C1QTNF4;LGALS3;SGCD;ADAMTS3;DPYSL5;KDR;PDE4A;NOS1;EDN3;TESC;WNT5A;ITGA1;EBF2;RTN4RL2;PROX1;PCDHGA9;AR;COL4A2;MMP15;PAX7;COL4A1;ROR1;FBP1;CREB5;COL15A1;NTN4;CACNA1C;CACNA1G;P2RY1;ARSI;GABRD;MFAP3L;ACE;LHFPL3;BICC1;GADD45G;HIPK2;PCDHGA11;PDE10A;GDNF;TSPAN18;NT5C1A;ID1;ITGA11;PDE3A;FXYD7;LHX6;FAT4
SOX9 24532713 ChIP-Seq HFSC Mouse	43/1203	3.09184e-05	0.00328618	2.08082	21.6076	SAMD5;MEGF6;MAST4;LAMA2;PAPLN;LAMA3;STON1;LRP5;SCX;XYLT1;CACNA1C;LGALS3;PDZD2;SGCD;SUFU;ABL2;TNRC18;CYYR1;TRPM3;RALGPS1;RPS12;MFAP3L;SLC10A6;CDK19;PHC1;ACE;AUTS2;DST;IQSEC1;DENND4C;ITGA1;TBCB;NCOR2;TIAM1;COL4A2;COL4A1;PALLD;TSPAN18;COL4A3;ITGA11;SCG5;ATF7;CREB5
TP53 23651856 ChIP-Seq MEFs Mouse	77/2541	8.68663e-06	0.00129257	1.81822	21.189	RET;SEMA5A;CCDC122;DAGLA;BMPR2;MAST4;LAMC3;SCX;SPINT2;PCSK6;IFIT3;ROBO1;NDST1;ARL5B;SGCD;RPS19;DPYSL5;PSD3;SACS;NOS1;ERC2;BAHCC1;RALGPS1;IER3;DST;DCXR;WNT5A;DNMT3A;PROX1;HSPG2;PCDHGA9;NCOR2;TIAM1;DEPDC7;CYP2U1;GAN;PAX7;PALLD;DDIT4;ROR1;CREB5;SAMD5;CEBPB;LAMA2;LRP5;PCDH12;CACNA1C;CBL;CACNA1G;BTAF1;PDZD2;SERTAD1;MGAT5;SEC14L5;INPP5J;HIVEP1;PLXNA1;TNRC18;KCNN4;USP24;AUTS2;IQSEC1;LHFPL4;LHFPL3;BTBD7;…
YAP1 20516196 ChIP-Seq MESCs Mouse	59/1868	3.77965e-05	0.00351508	1.85675	18.9078	SEMA5A;BMPR2;DYRK2;XYLT1;ADRA1A;ROBO1;NDST1;SPRED2;SGCD;ADAMTS3;DPYSL5;RAVER2;PSD3;PDE4A;RPL38;NOS1;GLUL;MME;DST;RPL13A;SORCS1;PROX1;RHOC;NCOR2;NR5A2;COL4A2;GAN;PAX7;COL4A1;PALLD;COL4A3;ROR1;FBP1;LAMA2;CACNA1C;FGD4;PSMB4;NWD1;PDZD2;MTHFD1L;MGAT5;HIVEP1;MYH10;SLC38A4;PHC1;AUTS2;IQSEC1;NBEAL1;LHFPL3;NR1D1;GADD45G;PDE10A;ITGA11;PDE3A;FAT1;FAT3;FAT4;MAP3K13;SLC25A36
ZNF217 24962896 ChIP-Seq MCF-7 Human	44/1289	7.31966e-05	0.00493168	1.98073	18.8613	NECAB1;CEBPB;DAGLA;DYRK2;MAST4;CRYBG3;NTN4;XYLT1;LAMC1;PCSK6;ARHGAP5;ROBO1;SPRED2;ARL5B;ADAMTSL3;PSD3;P2RY1;GNA12;RHPN2;SLC38A4;MLXIP;PLEKHG1;ZHX3;EDN3;MME;AUTS2;IQSEC1;HEG1;ZBTB38;SORCS1;GRHL1;GADD45G;HIPK2;NCOR2;TIAM1;BCL9;NR5A2;PALLD;CCDC88C;ID1;MAP3K13;FBP1;SLC25A36;CPEB4
ESR1 22446102 ChIP-Seq UTERUS Mouse	41/1183	9.43828e-05	0.00493168	2.00508	18.5834	RET;SEMA5A;COL15A1;KCNG4;DYRK2;MAST4;PRKCZ;LYST;LOXL2;FGD4;SPRED2;ARHGAP20;HMBOX1;ADAMTS3;MTHFD1L;ADAMTSL3;MGAT5;KDR;HIVEP1;BAHCC1;MYH10;TECTA;ZBP1;USP24;PLEKHG1;AUTS2;DST;DENND4C;ATP2B4;BICC1;SSH1;NCOR2;AR;BCL9;PDE10A;COL4A2;PALLD;COL4A4;PDE3A;ROR1;PADI1
DROSHA 22980978 ChIP-Seq HELA Human	18/409	0.000701943	0.0186516	2.50167	18.1663	RET;SAMD5;COL15A1;AUTS2;AK4;ADAMTS12;PRKCZ;NCOR2;BCL9;NWD1;PALLD;ITGA11;FAT1;FAT3;ROR1;NOS1;ERC2;RALGPS1
GF1B 26923725 Chip-Seq HPCs Mouse	43/1284	0.000135825	0.00594436	1.93647	17.2426	ITIH5;DYRK2;MAST4;POGK;SCX;IFIT3;FBXL22;CACNA1G;PROKR1;DPYSL5;ZMIZ2;SUFU;RAVER2;PSD3;P2RY1;KDR;PLXNA1;PDE4A;RPL38;NOS1;MYH10;RPS13;SPEN;CDK19;ZYG11A;MBD5;EDN3;AUTS2;DNMT3A;SORCS1;BTBD7;PROX1;FOXN3;GADD45G;TIAM1;DEPDC7;COL4A1;PALLD;DDIT4;FAT1;LCOR;FAT4;CREB5
DMRT1 23473982 ChIP-Seq TESTES Mouse	53/1678	9.88158e-05	0.00493168	1.84067	16.9752	SEMA5A;DAGLA;DYRK2;MTR;PCSK6;ARHGAP5;RPS19;DPYSL5;PSD3;NOS1;RALGPS1;PLEKHG1;TESC;WNT5A;DNMT3A;PROX1;HSPG2;CIT;NR5A2;DAAM2;COL4A1;DDIT4;ATF7;WDFY3;FREM1;ITIH5;CEBPB;RPL12;AK4;CACNA1C;PRKCZ;CACNA1G;FGD4;BTAF1;MTHFD1L;HIVEP1;TNRC18;MYH10;TRPM3;SLC38A4;SPEN;AUTS2;IQSEC1;LGI2;HUWE1;GADD45G;SSH1;TTLL4;PDE10A;CCDC88C;ID1;FAT1;PTPN4
OLIG2 23332759 ChIP-Seq OLIGODENDROCYTES Mouse	53/1679	0.000100331	0.00493168	1.83944	16.9358	SEMA5A;BMPR2;DYRK2;STON1;MTR;ARHGAP5;LYST;ROBO1;SPRED2;SGCD;DPYSL5;LRRTM2;RPL38;TECTA;PLEKHG1;MME;ZBTB38;WNT5A;ZBTB37;DNMT3A;ITGA1;TIAM1;PAX7;COL4A1;WDFY3;FREM1;CREB5;SAMD5;NECAB1;FGD4;MTHFD1L;MGAT5;SEC14L5;GNA12;ARSI;CYYR1;TRPM3;BEND5;CDK19;DCLK3;VWA3A;GADD45G;BCL9;GDNF;ITGA11;CYP1A1;PDE3A;PSMG4;DCHS1;FAT4;PTPN4;LDHAL6B;CPEB4
SMARCA4 23332759 ChIP-Seq OLIGODENDROCYTES Mouse	63/2089	7.80515e-05	0.00493168	1.77135	16.7537	SEMA5A;BMPR2;LAMC1;PCSK6;ARHGAP5;LYST;ROBO1;AKAP12;LGALS3;SGCD;ADAMTS3;SUFU;LRRTM2;ANKRD1;RPL35;ERC2;TECTA;PLEKHG1;ZHX3;MME;ZBTB38;WNT5A;ITGA1;SORCS1;TIAM1;NR5A2;COL4A1;ATF7;WDFY3;ROR1;CTXN3;FREM1;CREB5;SAMD5;NECAB1;PRKCZ;ARHGAP20;PDZD2;MTHFD1L;MGAT5;P2RY1;GNA12;KIF3C;CYYR1;TRPM3;BEND5;CDK19;VWA3A;BTBD7;FOXN3;BICC1;GADD45G;HIPK2;CYP1A1;PDE3A;FAT1;PSMG4;FAT3;FAT4;TMEM229A;MAP3K13;LDHAL6B;CPEB4
FOXA2 19822575 ChIP-Seq HepG2 Human	73/2553	0.000106058	0.00493168	1.68816	15.4492	DAGLA;BMPR2;MAST4;USP34;XYLT1;PCSK6;ARHGAP5;ROBO1;LOXL2;AKAP12;NDST1;SPRED2;RPS19;ADAMTSL3;SUFU;PSD3;ANKRD1;SACS;BAHCC1;RALGPS1;IER3;DST;TESC;HEG1;RPL13A;RTN4RL2;PROX1;HSPG2;TMEM37;DAAM2;PAX7;PALLD;COL4A4;DDIT4;LCOR;ATF7;FBP1;CEBPB;LAMA3;NTN4;LRP5;NID1;PRKCZ;GOLGA7B;FGD4;MTHFD1L;MGAT5;GNA12;INPP5J;TNRC18;KIF3C;RAB11FIP3;MYH10;PDZD7;SLC38A4;USP24;AUTS2;IQSEC1;NR1D1;FOXN3;BTBD8;BICC1;HIPK2;BCL9;TTL…
FOXA1 21915096 ChIP-Seq LNCaP-1F5 Human	51/1641	0.000200885	0.00830323	1.80242	15.3436	MRS2;DYRK2;MTR;ARHGAP5;AKAP12;LGALS3;SPRED2;PTAR1;SUFU;LRRTM2;KDR;SACS;CLEC1B;GLUL;BAHCC1;RPS13;TECTA;MME;HEG1;ZBTB37;PROX1;HEATR5A;DAAM2;MMP15;CDHR3;WDFY3;ROR1;CTXN3;SAMD5;CEBPB;CEBPD;AKAP5;ADAMTS12;P2RY1;GNA12;HIVEP1;TNRC18;MLXIP;USP24;SLC10A6;PHC1;IQSEC1;LHFPL3;GRHL1;BTBD8;BICC1;GADD45G;HIPK2;BAIAP3;BCL9;TMEM229A
MITF 21258399 ChIP-Seq MELANOMA Human	118/4614	7.08736e-05	0.00493168	1.56357	14.9393	SEMA5A;RPL3;POGK;XYLT1;IFIT3;LGALS3;NDST1;FADS2;DPYSL5;RPL35;GLUL;BAHCC1;IER3;TECTA;ZBP1;ZBTB38;ZBTB37;CACNA2D4;HSPG2;TIAM1;CYP2U1;COL4A2;DAAM2;RGS9BP;DDIT4;SCG5;ATF7;WDFY3;ROR1;PADI1;PRKCZ;GOLGA7B;HMBOX1;UAP1L1;HIVEP1;ARSI;PLXNA1;ABL2;KIF3C;RAB11FIP3;MYH10;TRPM3;MFAP3L;CDK19;IQSEC1;NR1D1;FOXN3;BTBD8;SSH1;GDNF;ID1;CYP1A1;REL;PDE3A;FAT1;PSMG4;FAT3;RPS21;LDHAL6B;DOCK3;MAST4;LAMC3;LAMC1;PCSK6;LYST;G…
TEAD4 22529382 ChIP-Seq TROPHECTODERM Mouse	53/1748	0.000273534	0.0101755	1.7578	14.4211	SEMA5A;MAST4;PCSK6;LYST;AKAP12;SPRED2;SGCD;ADAMTS3;DPYSL5;SUFU;RAVER2;SACS;NOS1;BAHCC1;RALGPS1;TECTA;PLEKHG1;ZHX3;ZBTB38;ITGA1;TIAM1;NR5A2;PALLD;COL4A4;COL4A3;PADI1;COL15A1;LAMA3;CACNA1C;ADAMTS12;FGD4;BTAF1;PDZD2;MGAT5;SEC14L5;ARSI;ABL2;TNRC18;SLC38A4;SPEN;CDK19;AUTS2;DENND4C;FOXN3;BICC1;HIPK2;SSH1;PDE10A;TSPAN18;PDE3A;FAT1;FAT3;FAT4
EP300 20729851 ChIP-Seq FORBRAIN MIDBRAIN LIMB HEART Mouse	42/1313	0.000426317	0.0132158	1.83819	14.265	MAST4;USP34;LRP5;SCX;CACNA1G;NT5C;LGALS3;NDST1;PROKR1;FADS2;NWD1;PDZD2;SERTAD1;PSD3;ANKRD1;PDE4A;BAHCC1;MYH10;TRPM3;SPEN;AUTS2;HEG1;ZBTB38;WNT5A;HUWE1;ATP2B4;EBF2;PROX1;FOXN3;RHOC;HSPG2;GADD45G;HIPK2;PDE10A;RGS9BP;DDIT4;CCDC88C;ID1;ITGA11;LCOR;CPEB4;CREB5
NR3C2 34362910 ChIP-Seq WistarRat Hippocampus Stress	33/974	0.0006869	0.0186516	1.93314	14.0797	SEMA5A;CCDC122;DAGLA;MAST4;LAMA2;MTR;LAMC1;LYST;GRM1;CACNA1G;SPRED2;HMBOX1;PDZD2;ADAMTS3;PDE4A;TNRC18;KIF3C;ERC2;TRPM3;USP24;PLEKHG1;DST;TESC;GADD45G;NCOR2;CALY;PALLD;CCDC88C;ID1;ITGA11;FAT3;ROR1;PTPN4
AR 19668381 ChIP-Seq PC3 Human	77/2803	0.000238421	0.00933607	1.61838	13.4997	RET;DYRK2;MTR;HSPB3;IFIT1;PCSK6;ARHGAP5;GRM1;ROBO1;LOXL2;AKAP12;SPRED2;ARL5B;SGCD;DPYSL5;ZMIZ2;SUFU;PSD3;KDR;ERC2;GLUL;RPS13;ZBP1;ZHX3;EDN3;DNMT3A;EBF2;SORCS1;CACNA2D4;PROX1;CIT;NCOR2;TIAM1;AR;DEPDC7;NR5A2;COL4A2;GAN;PAX7;COL4A1;RGS9BP;PALLD;ROR1;CTXN3;FBP1;ITIH5;MEGF6;LAMA2;LAMA3;CACNA1C;ADAMTS12;NID1;PRKCZ;CACNA1G;PDZD2;ABL2;RAB11FIP3;GABRD;MYH10;SLC10A6;MBD5;ZFHX2;AUTS2;IQSEC1;HUWE1;ATP2B4;LHF…
SUZ12 27294783 Chip-Seq ESCs Mouse	50/1657	0.00046181	0.0137435	1.74131	13.3739	SEMA5A;BMPR2;DYRK2;MAST4;SCX;ADRA1A;GRM1;C1QTNF4;FGF6;SGCD;DPYSL5;KDR;BAHCC1;ZHX3;DCXR;WNT5A;EBF2;RTN4RL2;PROX1;PAX7;COL4A4;DDIT4;COL4A3;IRF7;FBP1;NECAB1;NOTCH3;MEGF6;PAPLN;NTN4;CACNA1C;CACNA1G;GOLGA7B;PROKR1;INPP5J;HIVEP1;KCNN4;MFAP3L;GDF11;ACE;AUTS2;GRHL1;BICC1;GADD45G;PDE10A;GDNF;REL;LHX6;FAT4;TMEM229A
RNF2 18974828 ChIP-Seq MESCs Mouse	35/1066	0.000827211	0.020022	1.87336	13.2961	RET;SEMA5A;COL15A1;NTN4;ADRA1A;GRM1;CACNA1G;ARHGAP20;ADAMTS3;DPYSL5;P2RY1;KDR;ARSI;PDE4A;AUTS2;TESC;WNT5A;EBF2;LHFPL3;RTN4RL2;PROX1;PRAP1;BICC1;GADD45G;AR;PDE10A;COL4A2;GDNF;MMP15;PAX7;COL4A1;RGS9BP;PDE3A;LHX6;FAT4
EZH2 18974828 ChIP-Seq MESCs Mouse	35/1066	0.000827211	0.020022	1.87336	13.2961	RET;SEMA5A;COL15A1;NTN4;ADRA1A;GRM1;CACNA1G;ARHGAP20;ADAMTS3;DPYSL5;P2RY1;KDR;ARSI;PDE4A;AUTS2;TESC;WNT5A;EBF2;LHFPL3;RTN4RL2;PROX1;PRAP1;BICC1;GADD45G;AR;PDE10A;COL4A2;GDNF;MMP15;PAX7;COL4A1;RGS9BP;PDE3A;LHX6;FAT4
LEF1 29337183 ChIP-Seq mESC Mouse Stem	66/2335	0.000335481	0.0118856	1.65011	13.2008	SEMA5A;MAST4;POGK;ZDHHC5;XYLT1;SPINT2;LAMC1;HSPB3;PCSK6;LYST;ROBO1;LOXL2;LGALS3;NDST1;RAVER2;PSD3;RPL38;ERC2;BAHCC1;IER3;PLEKHG1;NHLRC3;DST;TESC;ZBTB38;EBF2;NCOR2;TIAM1;DEPDC7;PALLD;DDIT4;ROR1;FREM1;PADI1;CREB5;ITIH5;NOTCH3;LAMA3;CACNA1C;PRKCZ;FBXL22;GOLGA7B;PDZD2;MTHFD1L;MGAT5;PLXNA1;TNRC18;SPEN;SLC10A6;PHC1;AUTS2;IQSEC1;DCLK3;LHFPL4;FOXN3;HIPK2;PDE10A;TSPAN18;CCDC88C;ID1;REL;TRIP11;TMEM229A;MAP…
SMAD4 21799915 ChIP-Seq A2780 Human	62/2167	0.000380492	0.0128676	1.66489	13.1094	SEMA5A;DYRK2;DOCK3;MAST4;CRYBG3;XYLT1;LAMC1;LYST;GRM1;ROBO1;SGCD;ADAMTS3;SUFU;PSD3;KDR;NOS1;ERC2;TECTA;ZYG11A;EDN3;DST;ZBTB38;WNT5A;PROX1;AR;MMP15;PAX7;PALLD;ROR1;FBP1;PADI1;CREB5;CACNA1C;FGD4;ARHGAP20;PDZD2;C7;MGAT5;P2RY1;HIVEP1;CYYR1;MYH10;TRPM3;MFAP3L;SLC38A4;USP24;MBD5;AUTS2;LGI2;HUWE1;LHFPL3;FOXN3;BTBD8;BICC1;BCL9;PDE10A;ITGA11;FAT1;FAT3;DCHS1;SLC25A36;CPEB4
NR3C1 27076634 ChIP-Seq BEAS2B Human Lung Inflammation	82/3084	0.000409097	0.0132158	1.566	12.2173	CCDC122;DAGLA;DYRK2;MAST4;XYLT1;MTR;BEST3;ADRA1A;ROBO1;LOXL2;NDST1;FGF6;SPRED2;SGCD;ADAMTS3;ADAMTSL3;PSD3;KDR;ANKRD1;SACS;ERC2;IER3;RPS12;ZHX3;DST;HEG1;ITGA1;EBF2;SORCS1;RHOC;HSPG2;NCOR2;TIAM1;NR5A2;COL4A2;MMP15;COL4A1;DDIT4;COL4A3;LCOR;ATF7;PADI1;CREB5;CSTB;CEBPB;CEBPD;PAPLN;LAMA3;AK4;NID1;ASB18;FGD4;PDZD2;MTHFD1L;GNA12;ARSI;PLXNA1;KIF3C;KCNN4;SLC38A4;SLC10A6;CDK19;ACE;IQSEC1;DENND4C;DCLK3;ATP2B…
AHR 22903824 ChIP-Seq MCF-7 Human	21/577	0.00280921	0.0464456	2.05227	12.0568	USP24;NECAB1;RPL3;BMPR2;AUTS2;DST;ZBTB38;NTN4;LRP5;FOXN3;GRHL1;ROBO1;ARL5B;ADAMTSL3;DDIT4;CYP1A1;ERC2;FBP1;PADI1;BEND5;CPEB4
FOXA1 26769127 Chip-Seq PDAC-Cell Line Human	49/1658	0.00083425	0.020022	1.6989	12.0435	CCDC122;DAGLA;MAST4;POGK;USP34;ZDHHC5;SPINT2;LAMC1;IFIT1;ARHGAP5;LYST;IFIT3;LGALS3;ARL5B;ADAMTSL3;ANKRD1;GLUL;ZHX3;NHLRC3;PROX1;HSPG2;NR5A2;DDIT4;LCOR;ROR1;PADI1;MEGF6;CEBPB;CEBPD;PAPLN;LRP5;CBL;GOLGA7B;PSMB4;HIVEP1;ABL2;KCNN4;MLXIP;ATP2B4;NETO2;BTBD8;BICC1;GNMT;SSH1;BCL9;GALE;CCDC88C;TRIP11;DCHS1
SUZ12 16625203 ChIP-ChIP MESCs Mouse	31/944	0.00162867	0.0318877	1.86349	11.9636	COL15A1;NTN4;NID1;ADRA1A;GRM1;CACNA1G;C1QTNF4;ARHGAP20;DPYSL5;TESC;WNT5A;EBF2;RTN4RL2;PROX1;BICC1;GADD45G;HIPK2;PCDHGA9;AR;PCDHGA11;COL4A2;GDNF;DAAM2;MMP15;PAX7;COL4A1;REL;PDE3A;FXYD7;LHX6;ROR1
KDM2B 26808549 Chip-Seq K562 Human	49/1673	0.00101242	0.0235388	1.68181	11.5968	DAGLA;DYRK2;CRYBG3;LAMC3;POGK;LAMC1;PCSK6;ARHGAP5;LYST;SPRED2;ARL5B;DPYSL5;RAVER2;PDE4A;GLUL;BAHCC1;ZYG11A;TESC;HEG1;RTN4RL2;HSPG2;NCOR2;MMP15;GAN;PAX7;DDIT4;CDHR3;SAMD5;NOTCH3;MEGF6;LRP5;PRKCZ;CACNA1G;FGD4;PROKR1;MTHFD1L;MGAT5;TNRC18;GABRD;MLXIP;SPEN;IQSEC1;ATP2B4;NETO2;BAIAP3;TSPAN18;ID1;PSMG4;TECPR2
KDM2B 26808549 Chip-Seq REH Human	42/1389	0.00129436	0.0283237	1.7273	11.4861	ITIH5;NECAB1;CCDC122;DAGLA;CEBPD;LAMA2;LRP5;CACNA1C;LAMC1;HSPB3;IFIT1;PCSK6;ARHGAP5;AKAP12;GOLGA7B;SGCD;MTHFD1L;SERTAD1;MUSTN1;ZMIZ2;GNA12;ANKRD1;SACS;ASL;CYYR1;GLUL;RALGPS1;BEND5;MFAP3L;SPEN;AUTS2;SORCS1;GADD45G;TIAM1;PDE10A;COL4A2;MMP15;HEATR5B;CCDC88C;LCOR;TMEM229A;CREB5
TCF4 23295773 ChIP-Seq U87 Human	83/3177	0.000650017	0.0186005	1.53475	11.2628	SEMA5A;BMPR2;DYRK2;DOCK3;MAST4;CRYBG3;LAMC3;USP34;MTR;FHL5;HSPB3;LYST;BEST3;GRM1;ROBO1;AKAP12;SGCD;ADAMTS3;ZMIZ2;PSD3;ANKRD1;NUDT16;ERC2;BAHCC1;RPS12;PLEKHG1;ZHX3;DST;HEG1;ZBTB38;WNT5A;ITGA1;SORCS1;NCOR2;TIAM1;AR;HEATR5A;COL4A2;SOAT2;MMP15;GAN;HEATR5B;COL4A1;COL4A4;LCOR;ROR1;FREM1;PADI1;CREB5;LAMA2;LAMA3;NTN4;CACNA1C;ADAMTS12;FGD4;PDZD2;C7;KIF3C;TRPM3;USP24;AUTS2;IQSEC1;ATP2B4;NBEAL1;VWA3A;LHFPL3…
SMAD4 21741376 ChIP-Seq HESCs Human	53/1862	0.00118859	0.0267973	1.63655	11.0222	SEMA5A;KCNG4;BMPR2;DOCK3;LAMC3;AQP4;SPINT2;IFIT3;ROBO1;C1QTNF4;NOS1;GLUL;BAHCC1;RALGPS1;IER3;NHLRC3;DST;TESC;EBF2;CACNA2D4;TMEM37;PAX7;PALLD;DDIT4;ROR1;CTXN3;FREM1;CREB5;ITIH5;CEBPB;LAMA2;LAMA3;NTN4;CACNA1C;CACNA1G;GOLGA7B;FGD4;BTAF1;MTHFD1L;GNA12;PLXNA1;RHPN2;USP24;MBD5;IQSEC1;LGI2;ATP2B4;BICC1;PDE10A;TSPAN18;ID1;MAP3K13;CPEB4
PPARG 20176806 ChIP-Seq MACROPHAGES Mouse	34/1083	0.00206127	0.0366781	1.7816	11.0182	DYRK2;DOCK3;MAST4;ROBO1;AKAP12;NDST1;FGD4;PSMB4;HMBOX1;BTAF1;MUSTN1;MGAT5;RAVER2;P2RY1;GNA12;HIVEP1;SACS;PLXNA1;GLUL;CDK19;ZYG11A;IQSEC1;WNT5A;DNMT3A;LGI2;PROX1;FOXN3;GRHL1;HIPK2;SSH1;NCOR2;CDHR3;FREM1;LDHAL6B
RARB 27405468 Chip-Seq BRAIN Mouse	47/1611	0.00139635	0.0288579	1.67029	10.9803	SAMD5;RPL3;DAGLA;CRYBG3;POGK;AKAP5;CACNA1C;FHL5;PRKCZ;C1QTNF4;EEF1B2;NDST1;SPRED2;ADAMTS3;ZMIZ2;SEC14L5;LRRTM2;ABL2;PDE4A;TNRC18;NOS1;KCNN4;ERC2;BAHCC1;TRPM3;SPEN;LYNX1;AUTS2;DST;ZBTB38;ZBTB37;DENND4C;DNMT3A;DCLK3;BTBD7;NR1D1;MT3;BAIAP3;NCOR2;NR5A2;PDE10A;PPP1R1A;SOAT2;PALLD;DDIT4;TCAP;CPEB4
PPARG 20176806 ChIP-Seq 3T3-L1 Mouse	41/1369	0.00176574	0.0328427	1.7069	10.8204	COL15A1;AKAP5;ADAMTS12;AKAP12;PSMB4;ARHGAP20;PDZD2;SGCD;SUFU;MGAT5;P2RY1;SACS;TSPO;ABL2;NOS1;BAHCC1;MYH10;RPS12;SLC38A4;MLXIP;USP24;DST;IQSEC1;TESC;WNT5A;ATP2B4;SORCS1;GADD45G;HIPK2;SSH1;NCOR2;AR;COL4A2;COL4A1;FAT1;PSMG4;ROR1;PTPN4;LDHAL6B;CPEB4;CREB5
TOP2B 26459242 ChIP-Seq MCF-7 Human	46/1575	0.00153836	0.0309336	1.67027	10.8184	SAMD5;ITIH5;CCDC122;NOTCH3;DYRK2;LAMA2;XYLT1;MTR;ADAMTS12;ARHGAP5;LYST;GRM1;ROBO1;PROKR1;ARHGAP20;PDZD2;ADAMTS3;MTHFD1L;ADAMTSL3;LRRTM2;GNA12;RPL38;ERC2;RAB11FIP3;TRPM3;SLC38A4;USP24;PLEKHG1;MME;AUTS2;DST;TESC;EBF2;LHFPL4;SORCS1;LHFPL3;PROX1;FOXN3;GADD45G;SSH1;AR;DAAM2;GAN;PALLD;ROR1;MAP3K13
GATA1 19941827 ChIP-Seq MEL Mouse	43/1453	0.00171348	0.0326879	1.68871	10.7558	COL15A1;ZDHHC5;NTN4;LRP5;XYLT1;AKAP5;CACNA1C;PRKCZ;NDST1;PROKR1;PDZD2;DPYSL5;SUFU;MGAT5;GNA12;KDR;SACS;PLXNA1;PDE4A;KCNN4;BAHCC1;RALGPS1;ZBTB38;DNMT3A;RPL13A;FOXN3;CIT;SSH1;TIAM1;BCL9;PDE10A;COL4A2;SOAT2;MMP15;GAN;PAX7;COL4A4;CCDC88C;COL4A3;FAT3;WDFY3;PADI1;SPC24
RCOR3 21632747 ChIP-Seq MESCs Mouse	59/2142	0.00135278	0.0287562	1.58771	10.4878	XYLT1;LAMC1;PCSK6;ARHGAP5;ADRA1A;ROBO1;SACS;PDE4A;RPL38;NOS1;ERC2;RALGPS1;LYNX1;PLEKHG1;TESC;HEG1;CACNA2D4;HSPG2;PRAP1;CIT;TIAM1;NR5A2;HEATR5A;SOAT2;GAN;COL4A1;DDIT4;LCOR;WDFY3;COL6A6;PADI1;LAMA2;PAPLN;PRKCZ;GOLGA7B;HMBOX1;ASL;TNRC18;ROMO1;RHPN2;RAB11FIP3;TRPM3;SLC38A4;MLXIP;USP24;PHC1;ACE;AUTS2;IQSEC1;LGI2;ATP2B4;LHFPL4;LHFPL3;NR1D1;BCL9;PPP1R1A;ID1;DCHS1;RPS21
NANOG 18358816 ChIP-ChIP MESCs Mouse	28/865	0.0033075	0.0512662	1.82736	10.4371	CACNA1C;LAMC1;AKAP12;FGD4;SPRED2;ANKRD1;SACS;GLUL;MLXIP;PHC1;DST;DNMT3A;ITGA1;PRAP1;GADD45G;PCDHGA9;PCDHGA11;DBF4;CYP2U1;PPP1R1A;COL4A2;PAX7;ID1;WDFY3;ROR1;RPS21;FBP1;SLC25A36
POU5F1 18347094 ChIP-ChIP MESCs Mouse	45/1555	0.00207054	0.0366781	1.65119	10.2043	RPL3;BMPR2;LAMC3;ARHGAP5;AKAP12;EEF1B2;FGD4;SPRED2;RPS19;MTHFD1L;DPYSL5;MGAT5;HIVEP1;SACS;TSPO;ABL2;RHPN2;GLUL;IER3;SLC38A4;ZBP1;SPEN;PHC1;DST;HEG1;ZBTB38;ZBTB37;DNMT3A;ITGA1;PROX1;GADD45G;PCDHGA9;NCOR2;TTLL4;DBF4;PAX7;DDIT4;ID1;REL;LCOR;FAT3;ROR1;SPC24;SLC25A36;LDHAL6B
CDX2 21402776 ChIP-Seq INTESTINAL-VILLUS Mouse	44/1514	0.00214291	0.0370774	1.65703	10.1834	SAMD5;BMPR2;DYRK2;LAMA2;POGK;LAMC1;LYST;ASB18;GRM1;AKAP12;EEF1B2;SPRED2;SGCD;MTHFD1L;ZMIZ2;MGAT5;ABL2;ZBED6;RPS27A;GLUL;MYH10;RPS12;CDK19;PLEKHG1;DST;WNT5A;ZBTB37;DNMT3A;ATP2B4;NBEAL1;PROX1;BICC1;TMEM37;NR5A2;TTLL4;HEATR5A;COL4A4;DDIT4;CCDC88C;COL4A3;REL;PSMG4;PTPN4;CPEB4
FOXM1 26100407 CHIP-SEQ Hek293 Flp-In Human	45/1577	0.00270616	0.0457587	1.62551	9.61036	BMPR2;MAST4;LAMA3;SPINT2;LAMC1;ARHGAP5;LYST;BEST3;ROBO1;LGALS3;FGD4;FADS2;SPRED2;ARHGAP20;RPS19;SERTAD1;SACS;NAALAD2;TNRC18;GLUL;BAHCC1;SPEN;USP24;CDK19;MME;AUTS2;DST;WNT5A;DCLK3;HUWE1;EBF2;CIT;TIAM1;BCL9;NR5A2;PDE10A;CALY;GDNF;DDIT4;CCDC88C;FAT1;LCOR;ROR1;PTPN4;CREB5
TCF21 26020271 ChIP-Seq SMOOTH MUSCLE Human	46/1629	0.00296527	0.0479601	1.60848	9.36263	KCNG4;DYRK2;MAST4;RPL12;PAPLN;LAMC1;IFIT1;ADAMTS12;NID1;RBM3;NDST1;SPRED2;ARHGAP20;ADAMTS3;SERTAD1;ZMIZ2;HIVEP1;SACS;ARSI;MLXIP;CDK19;MME;DST;HEG1;ZBTB38;ITGA1;EBF2;HSPG2;BICC1;SSH1;TTLL4;PDE10A;CYP2U1;PPP1R1A;GAN;COL4A4;TSPAN18;DDIT4;ID1;CYP1A1;FAT1;PSMG4;ATF7;DCHS1;FBP1;SPC24
SMARCD1 25818293 ChIP-Seq ESCs Mouse	47/1683	0.00330683	0.0512662	1.59042	9.08408	RET;MAST4;LAMA2;ZDHHC5;LRP5;ADAMTS12;PCSK6;PRKCZ;LYST;GRM1;ROBO1;HMBOX1;ARL5B;PDZD2;MGAT5;PSD3;PGGT1B;ABL2;PDE4A;TNRC18;KCNN4;ERC2;MYH10;RALGPS1;MFAP3L;CDK19;GSTM2;MBD5;MME;AUTS2;DST;HUWE1;NBEAL1;SORCS1;LHFPL3;CACNA2D4;FOXN3;HIPK2;SSH1;TIAM1;GAN;SCG5;FXYD7;FAT3;WDFY3;FBP1;SLC25A36
eTable S25 ChEA Transcription Factor Analysis of DEGs Highly Associated with CFAB
