# Supplementary material for: Skeletal Muscle Transcriptome Alterations Related to Declining Physical Function in Older Mice
Source: MDPI journal article supplement (doi:10.3390/jal3020013), 2023-05-31
Supplement: s1 [file s1]

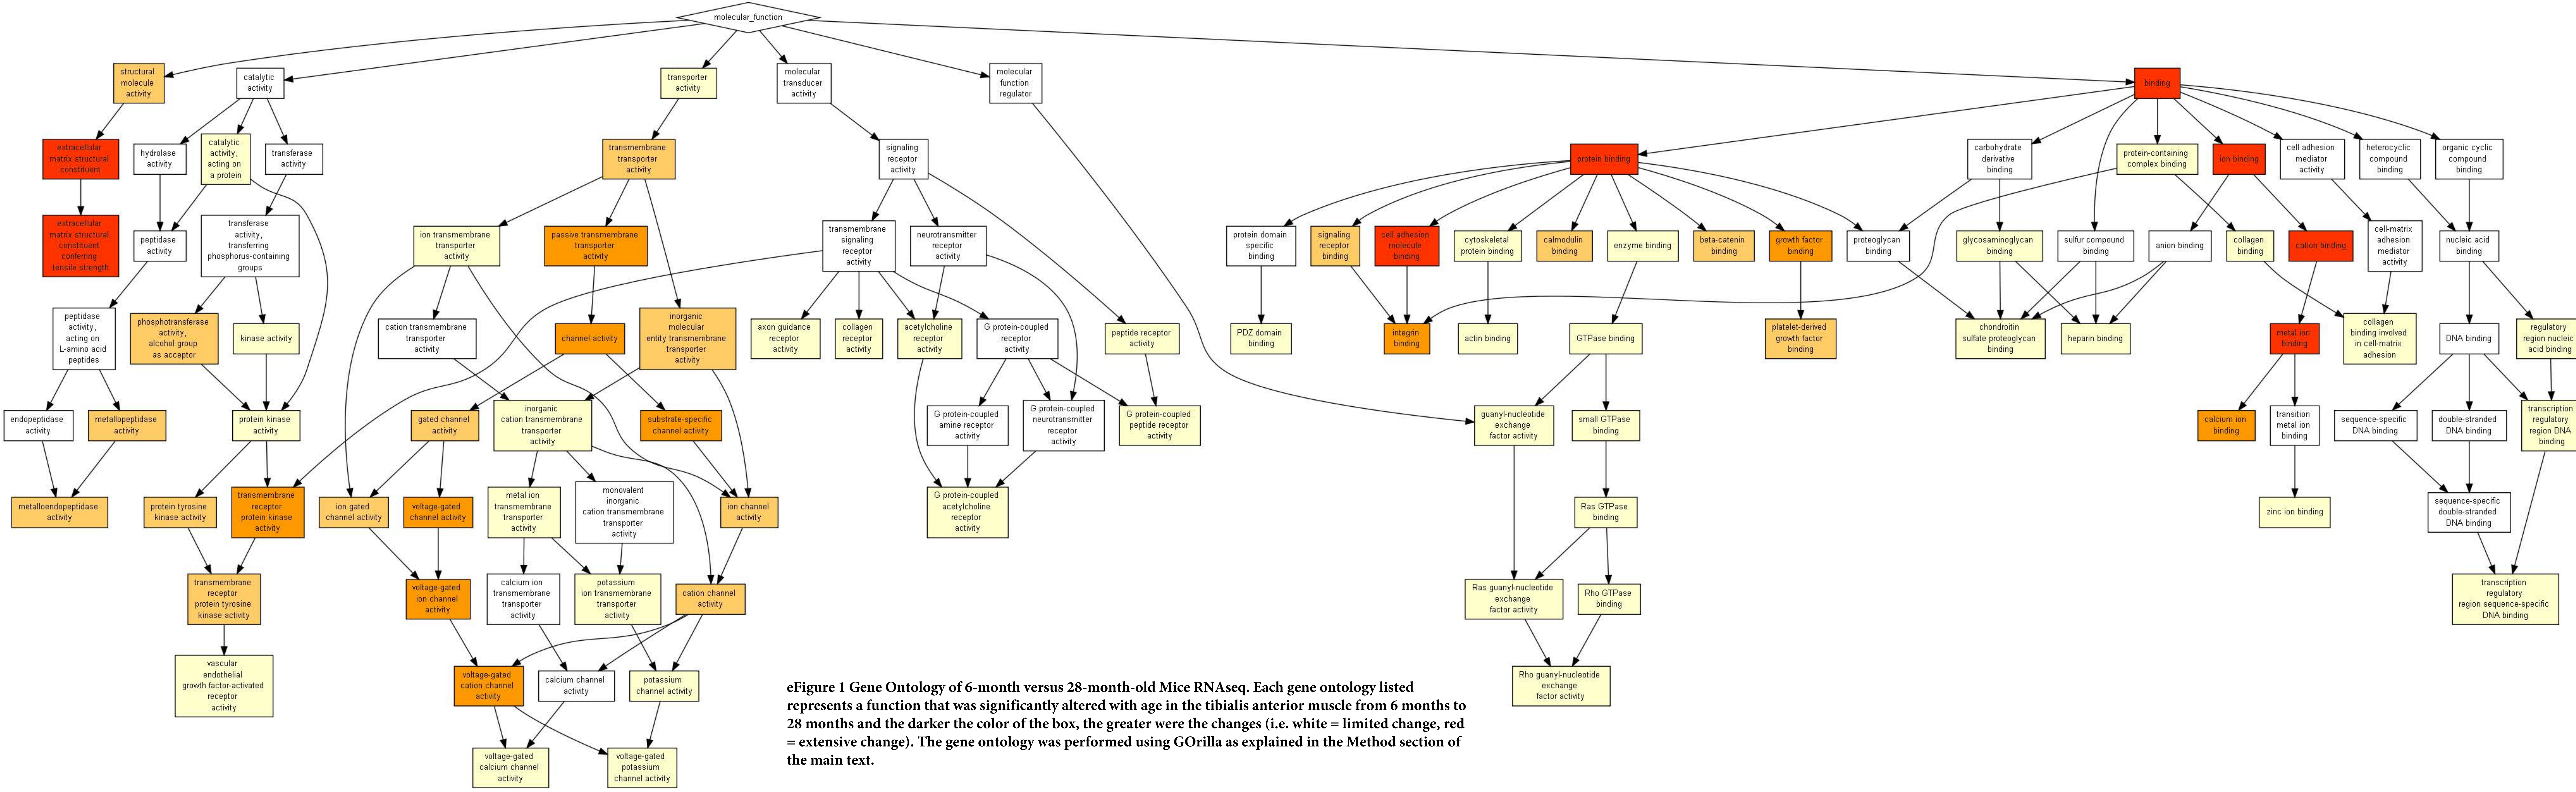

**eFigure 1 Gene Ontology of 6-month versus 28-month-old Mice RNaseq.** Each gene ontology listed represents a function that was significantly altered with age in the tibialis anterior muscle from 6 months to 28 months and the darker the color of the box, the greater were the changes (i.e. white = limited change, red = extensive change). The gene ontology was performed using GOrilla as explained in the Method section of the main text.
