# Supplementary figures and images for: Skeletal Muscle Transcriptome Alterations Related to Declining Physical Function in Older Mice
Source: MDPI journal article supplement (doi:10.3390/jal3020013), 2023-05-31

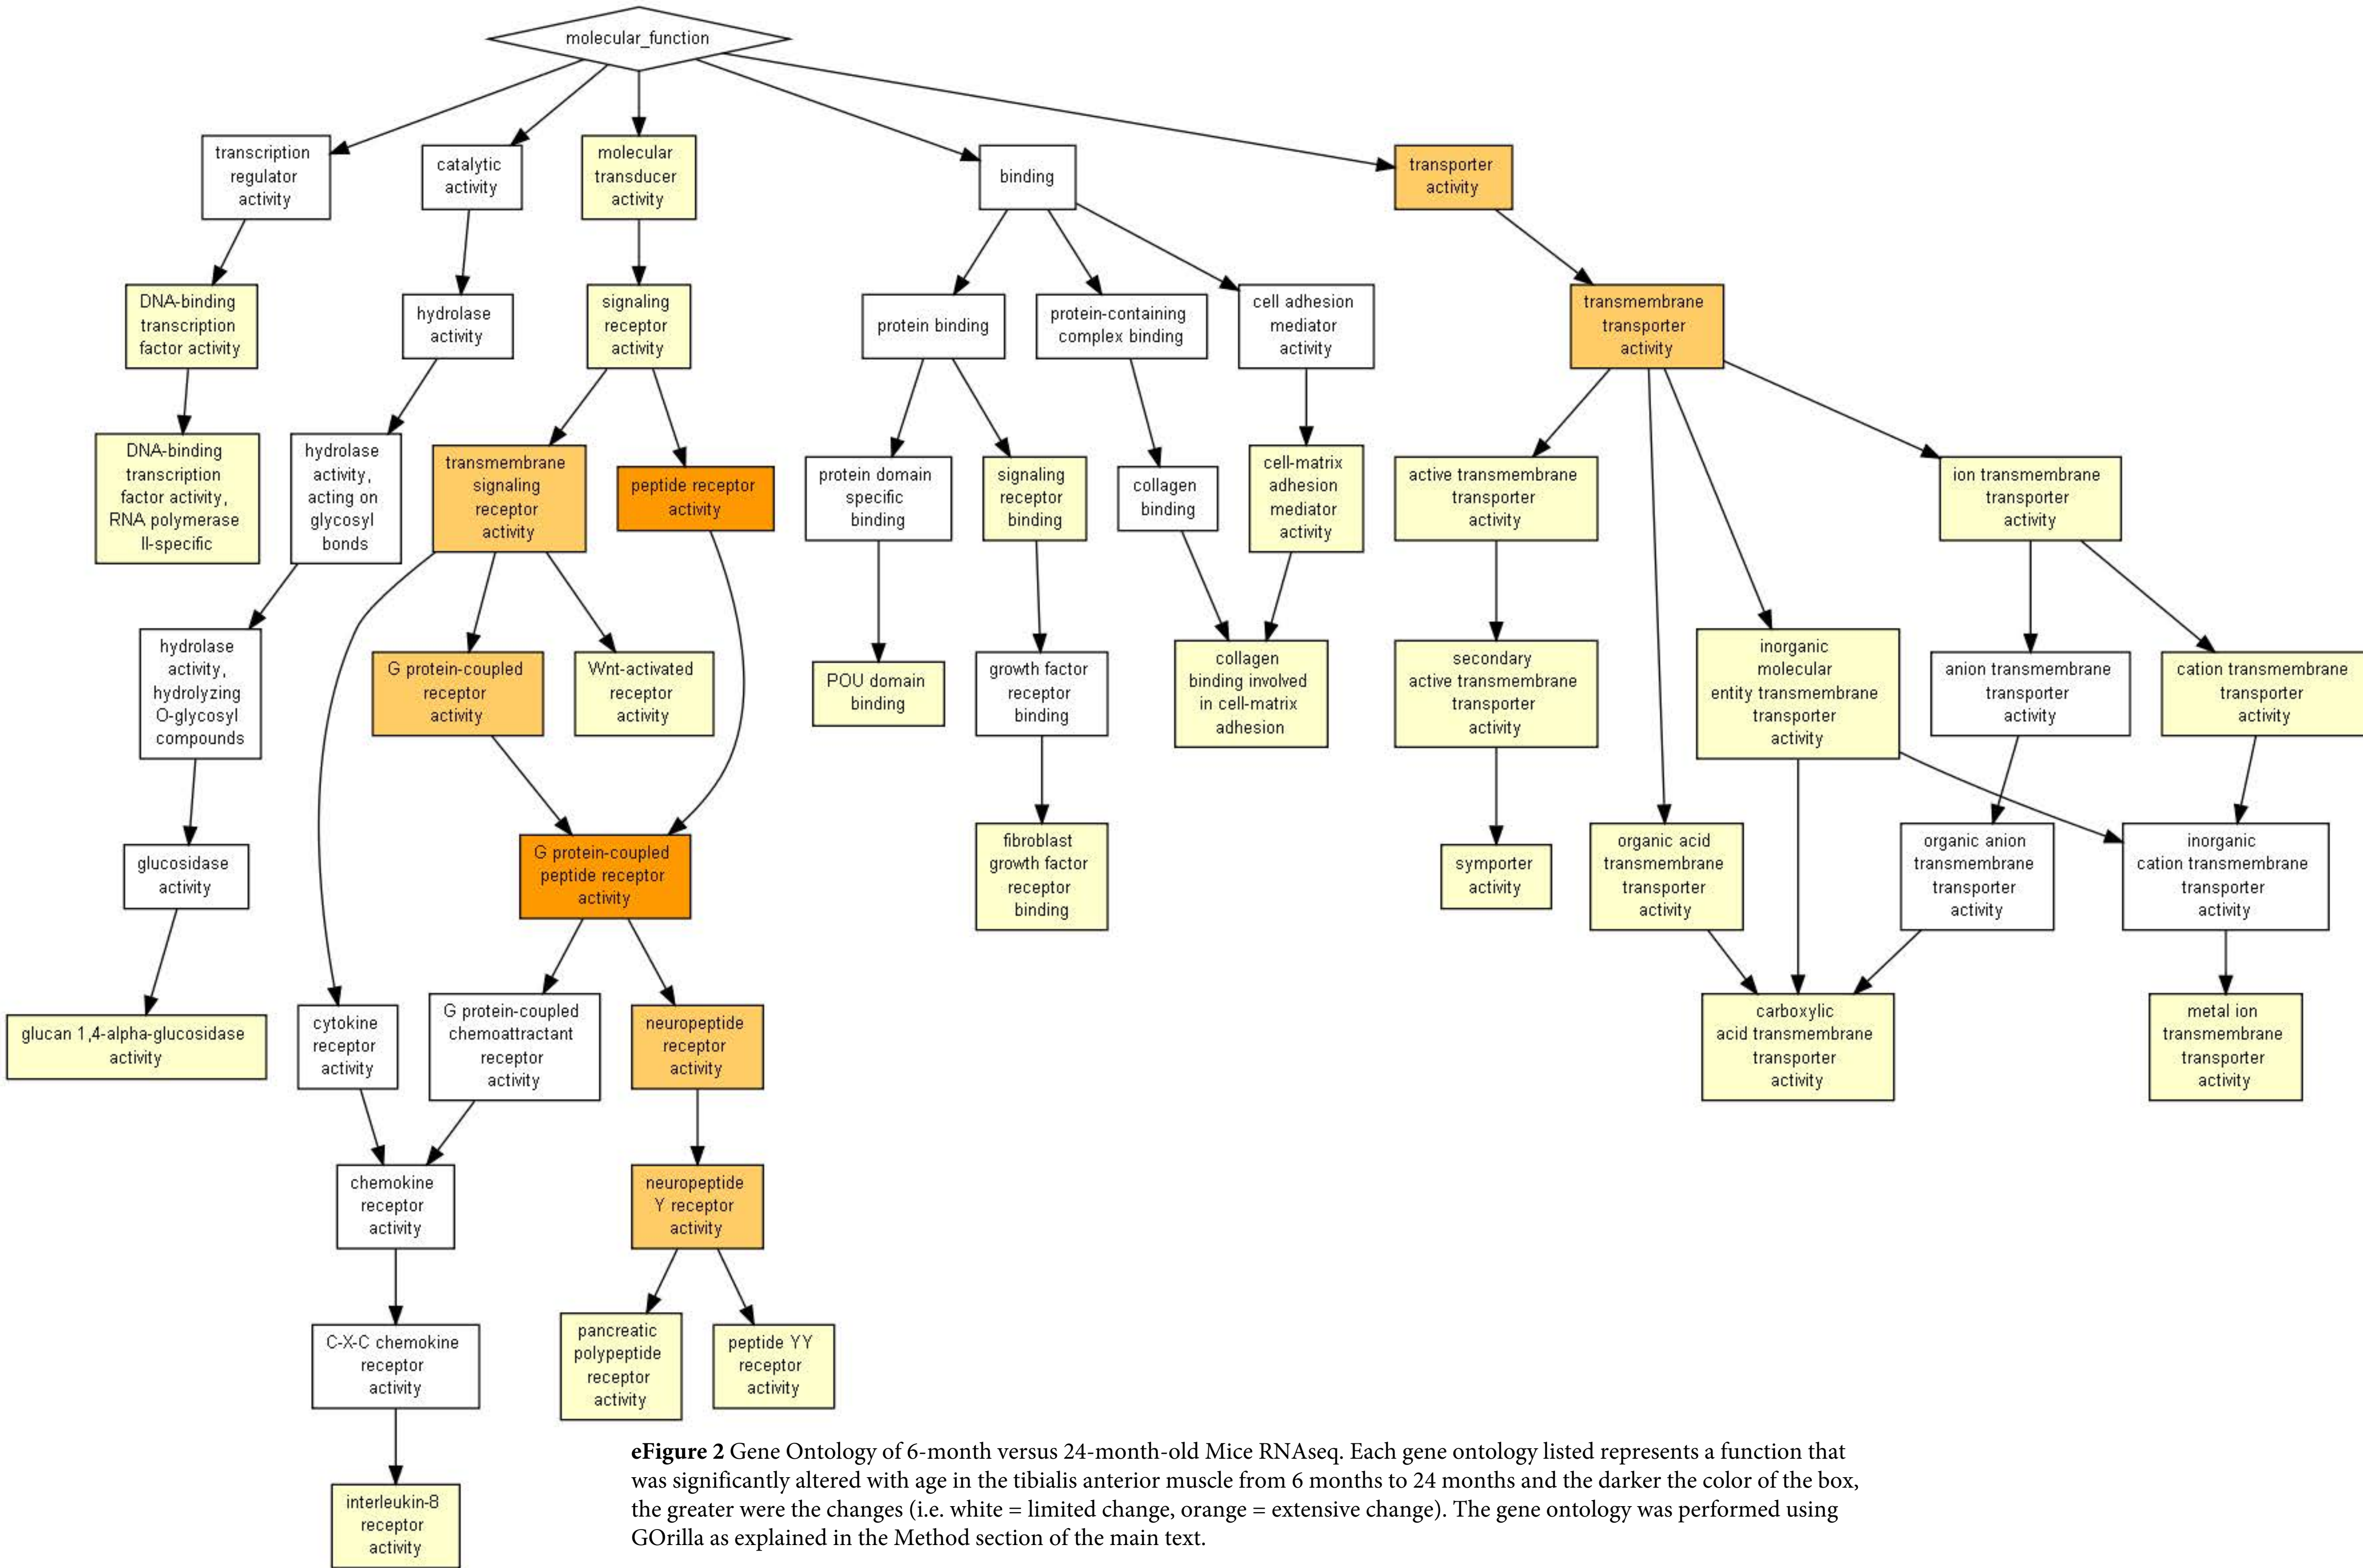

Supplement: s1 [file s1]
